# Supplementary material for: Aminocatalytic asymmetric [4 + 2]-annulation to access functionally rich hexahydrospiroindole pyrazolones
Source: Royal Society of Chemistry journal article supplement (doi:10.1039/d2ob01085b), 2022-01-01

## Supporting Information-II

### NMR Spectral Data

#### Aminocatalytic asymmetric [4+2]-annulation to access functionally rich hexahydrospiroindole pyrazolones

Madavi S. Prasad,\* Murugesan Sivaprakash, and A. Palanichamy

*Asymmetric Synthesis and Catalysis Laboratory, Department of Chemistry, Central University of Tamil Nadu, Thiruvarur, 610 005, India*

[shivaprasad@cutn.ac.in](mailto:shivaprasad@cutn.ac.in) and [shivacutn@gmail.com](mailto:shivacutn@gmail.com)

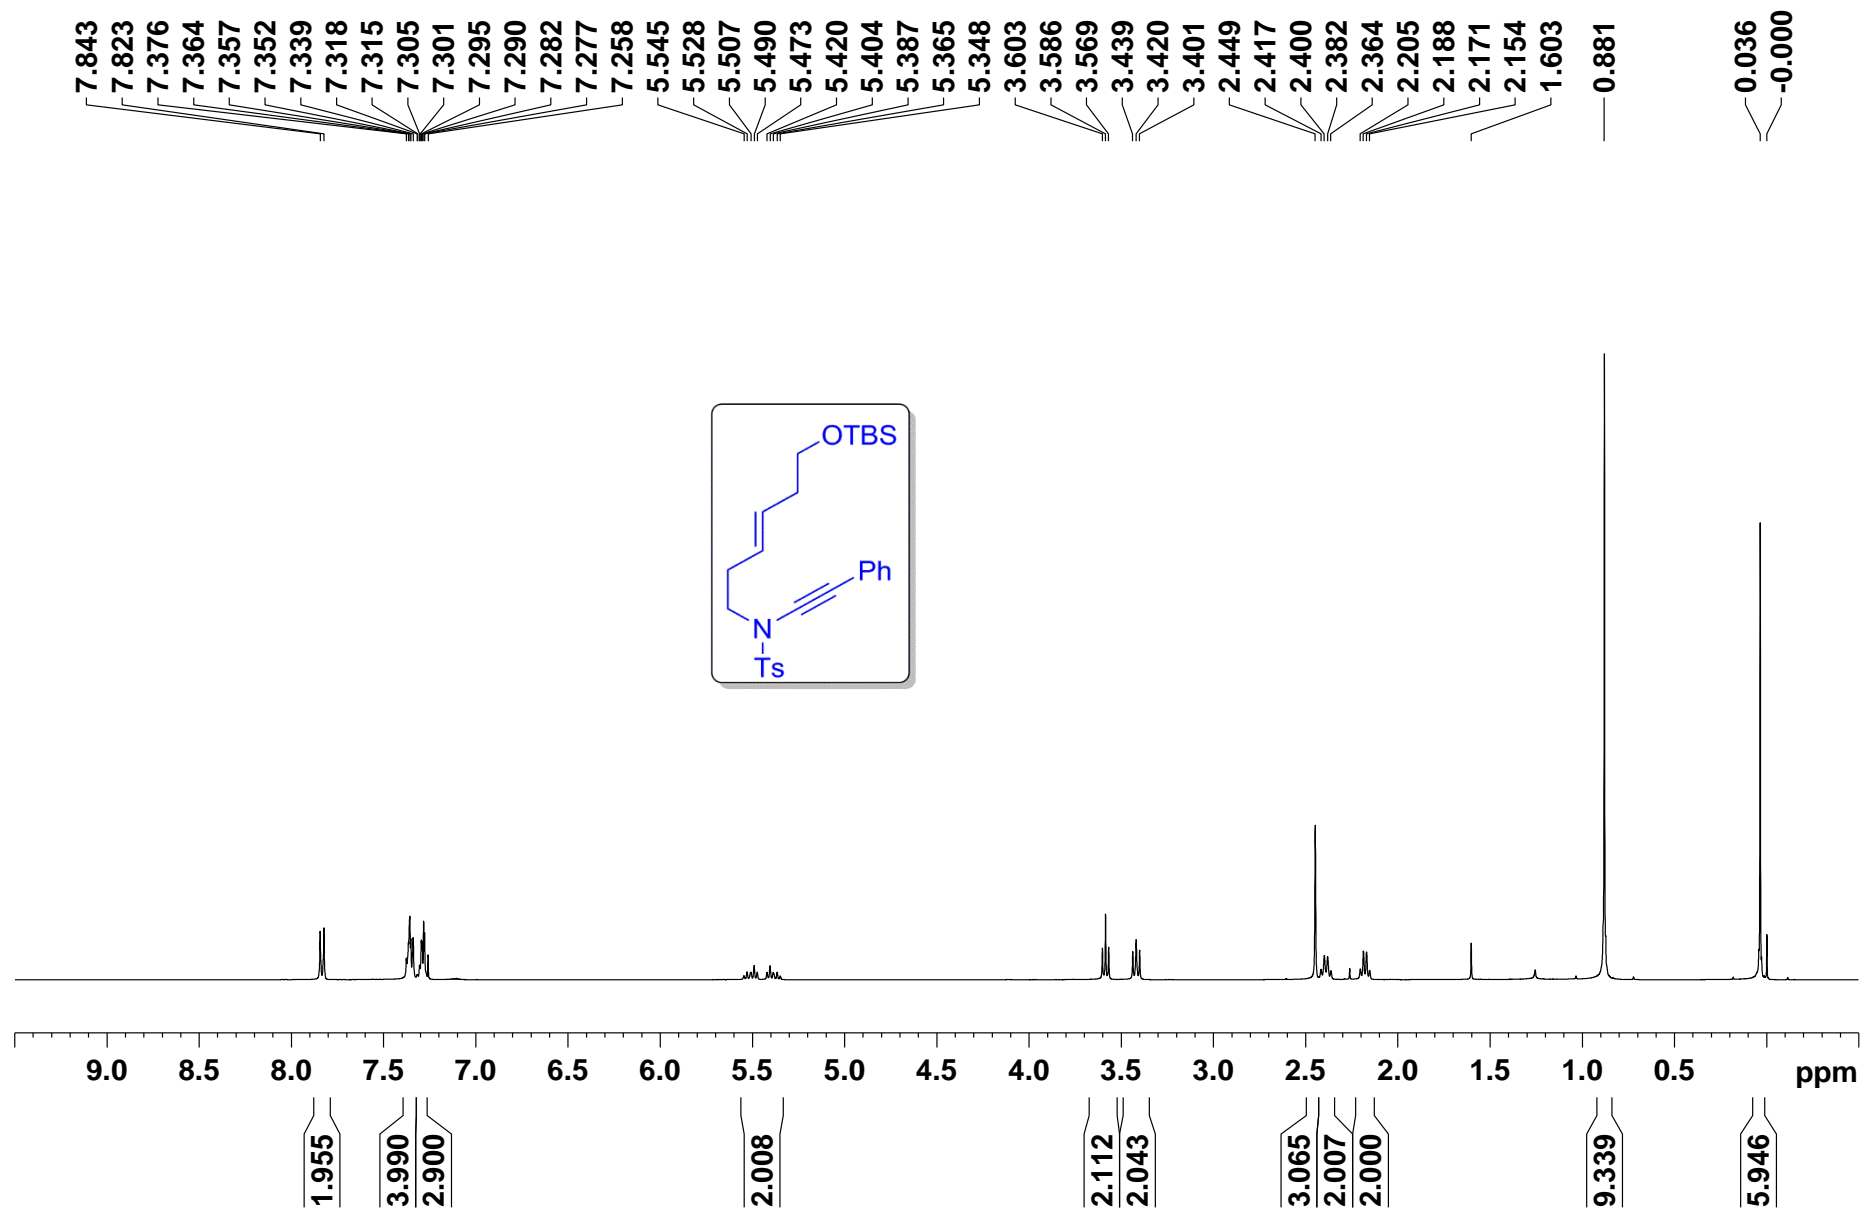

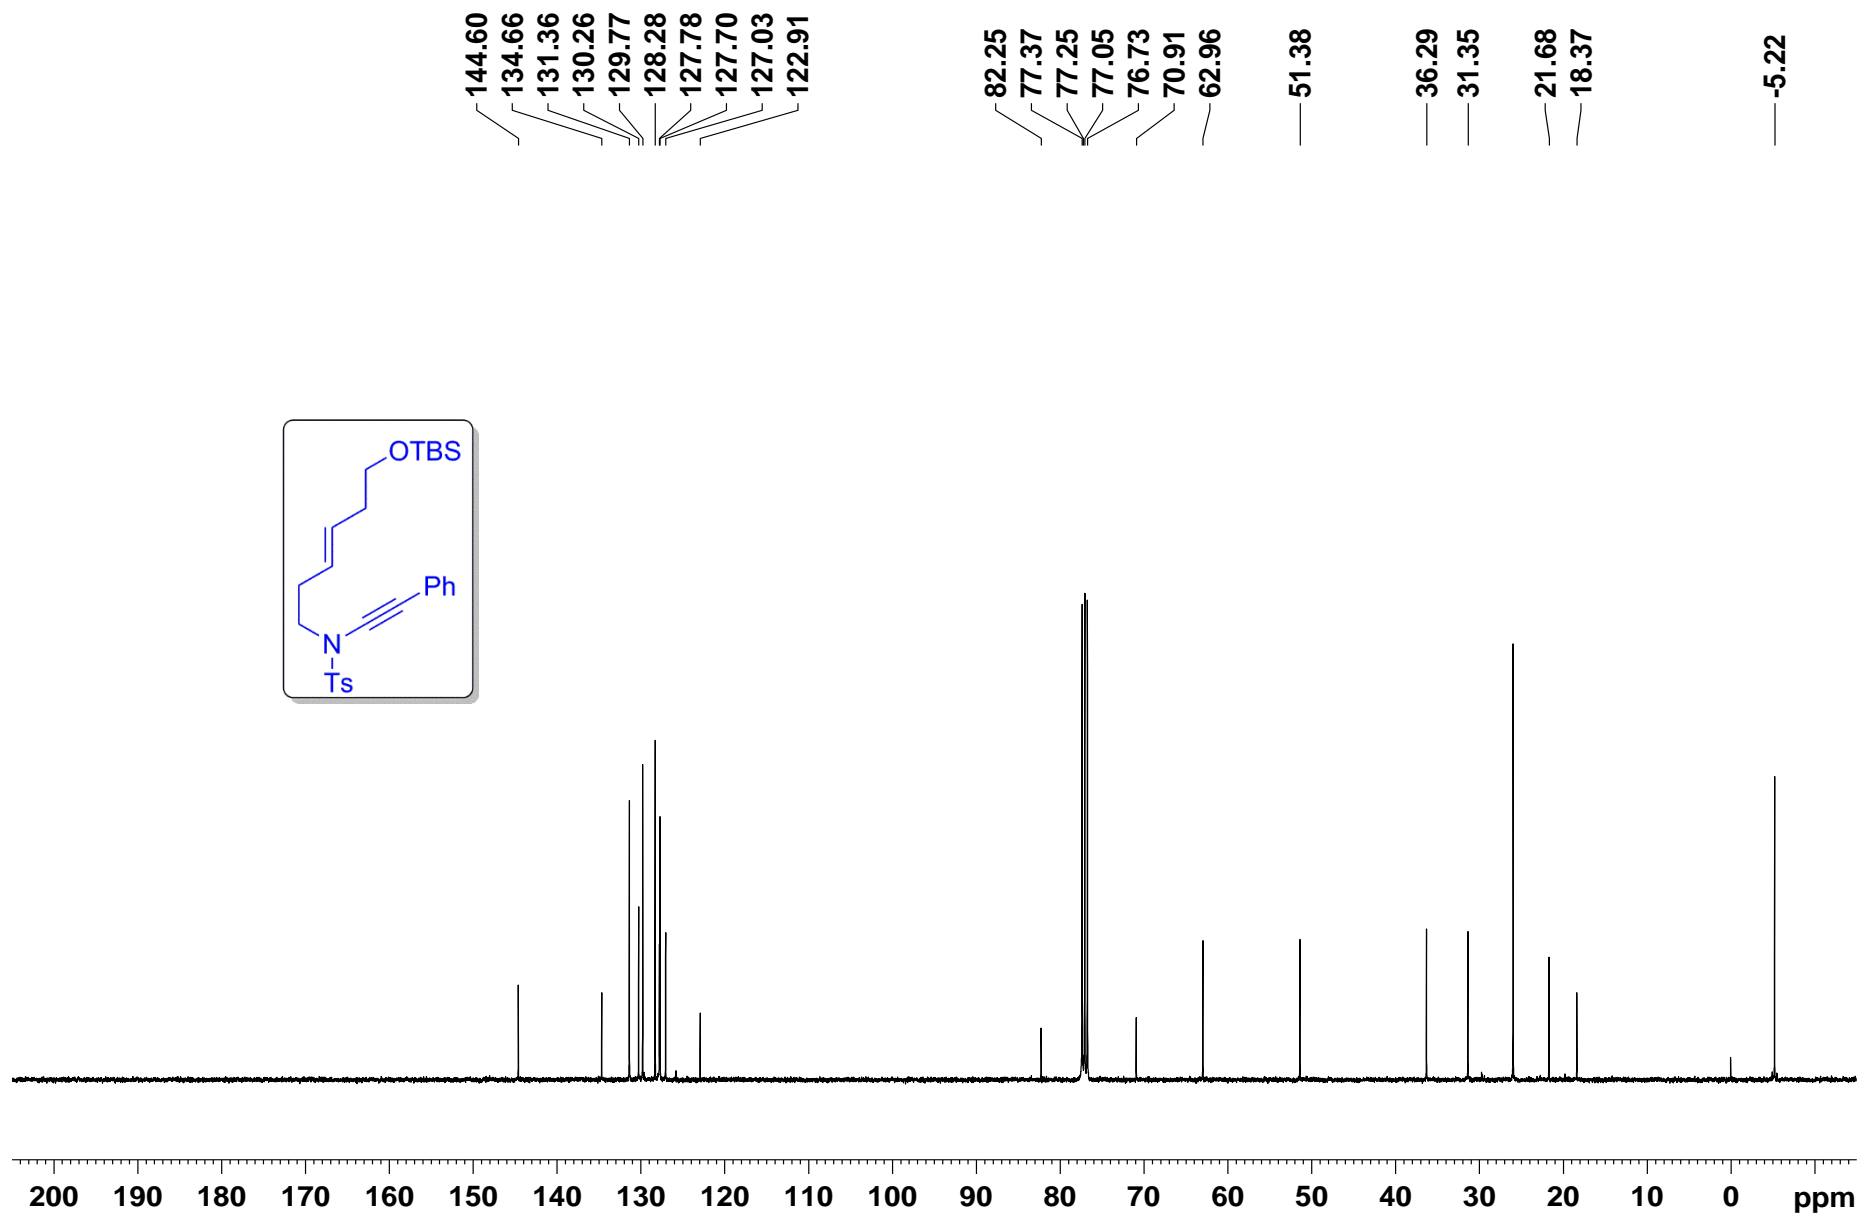

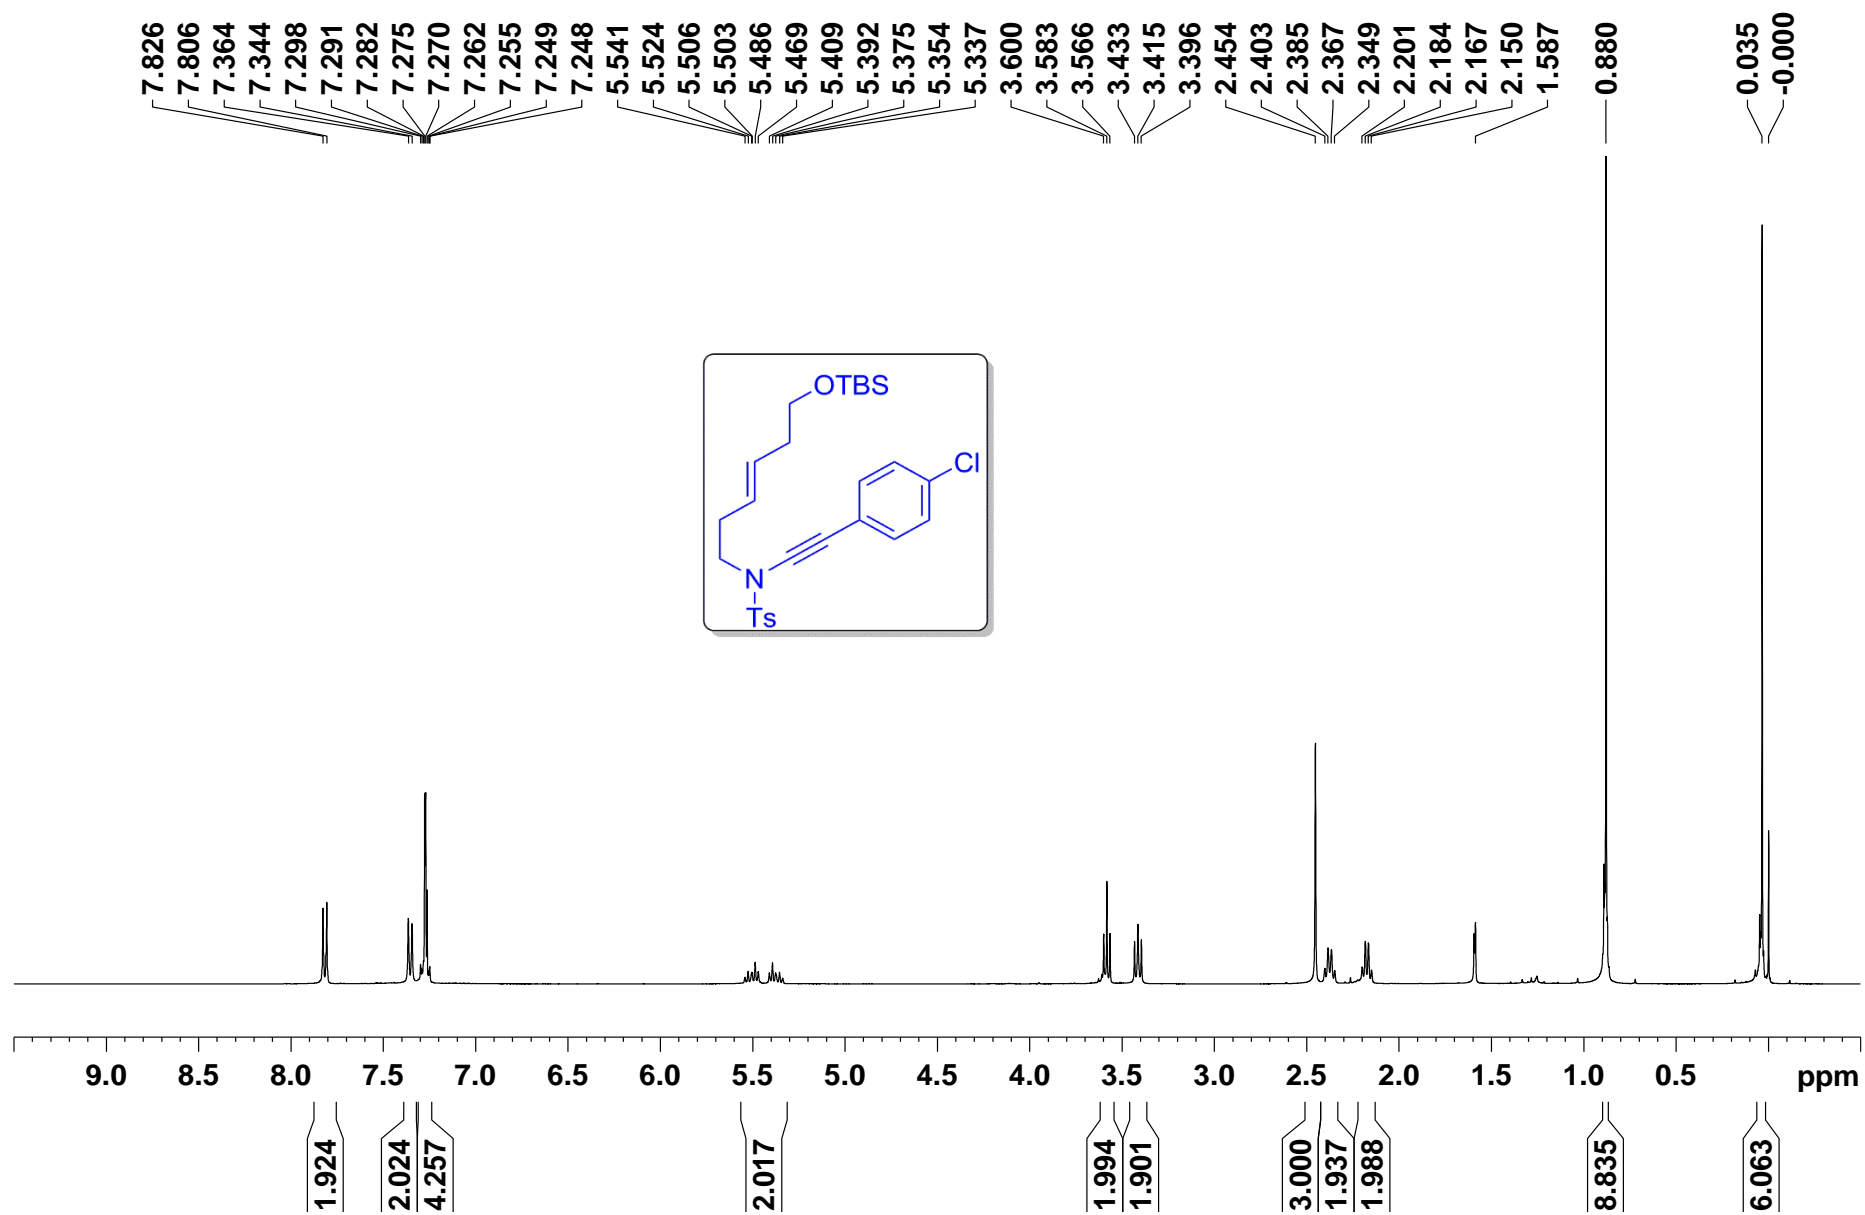

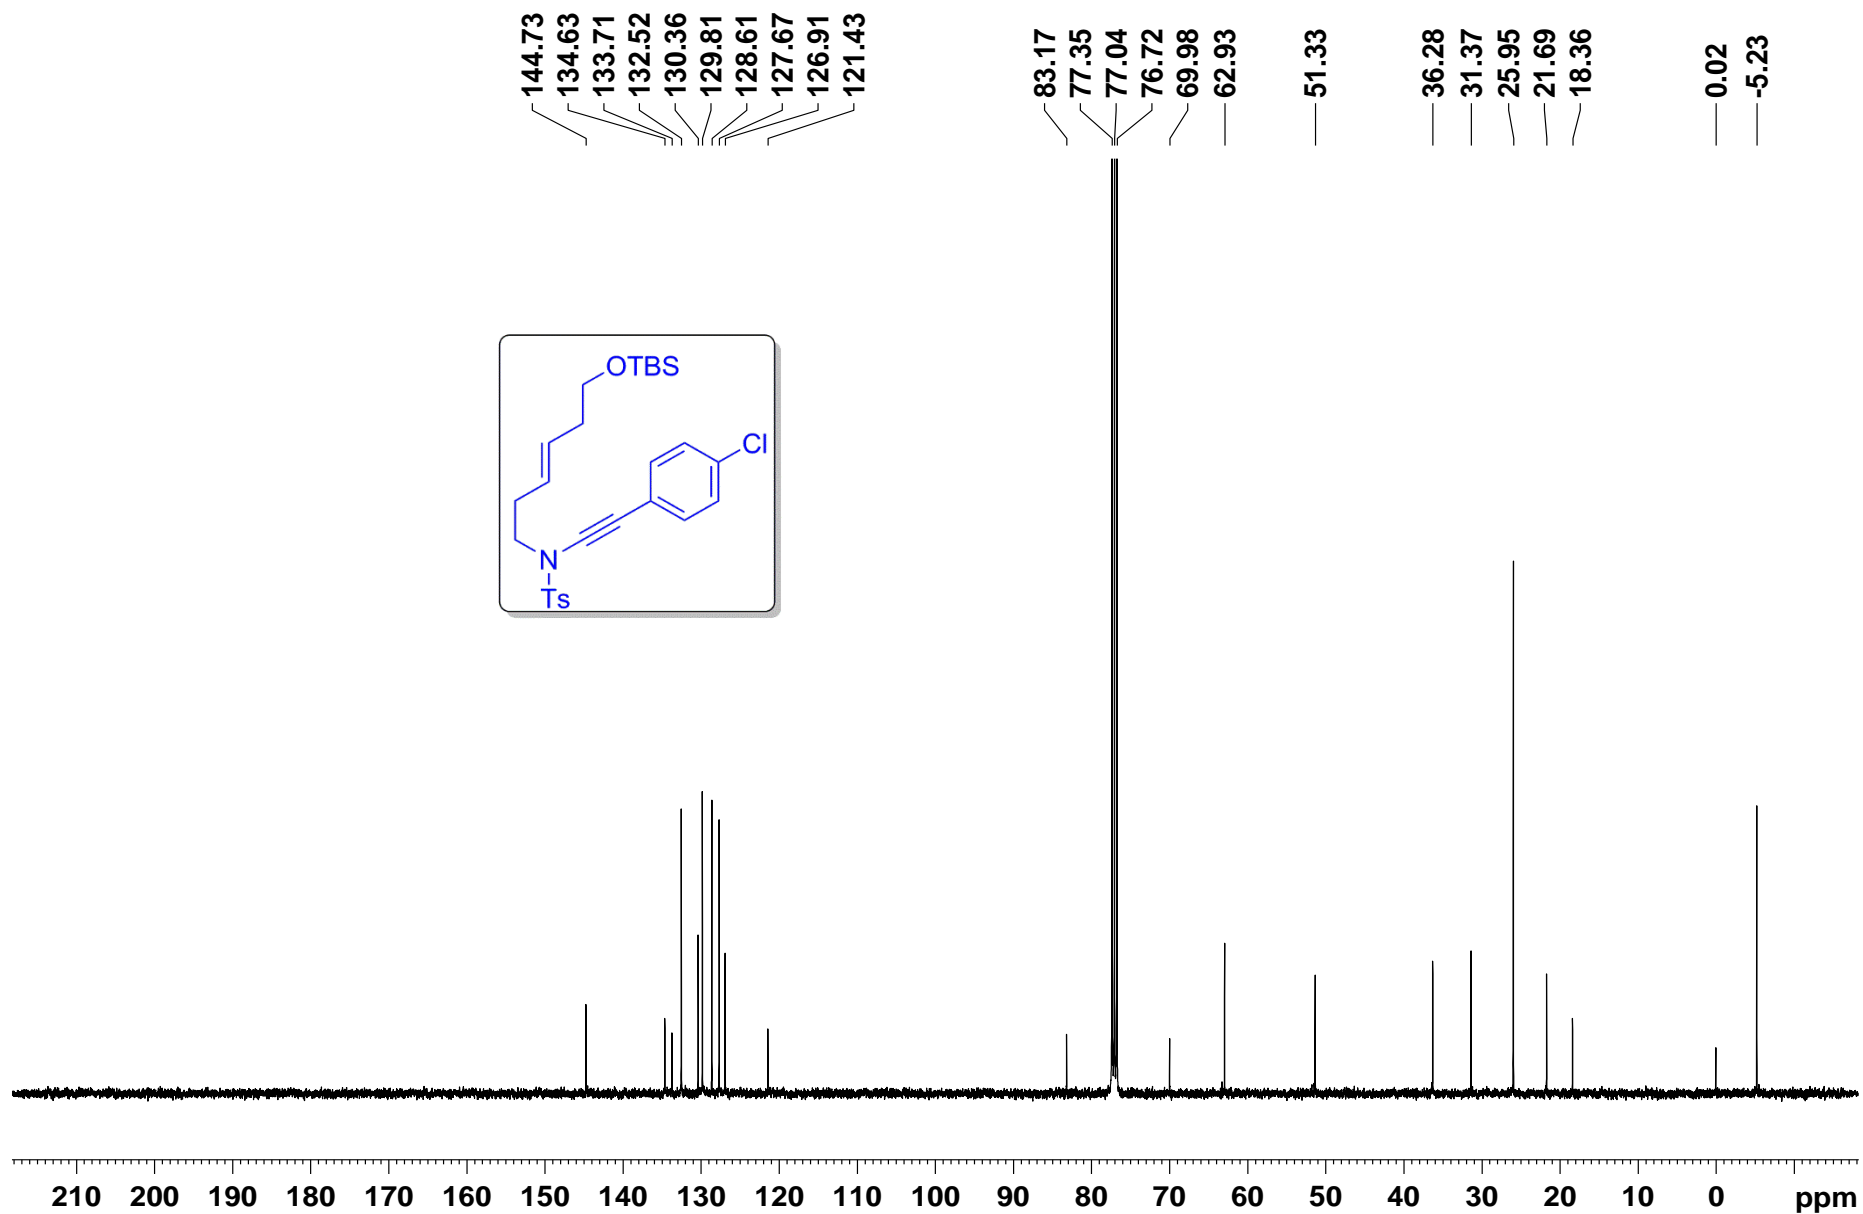

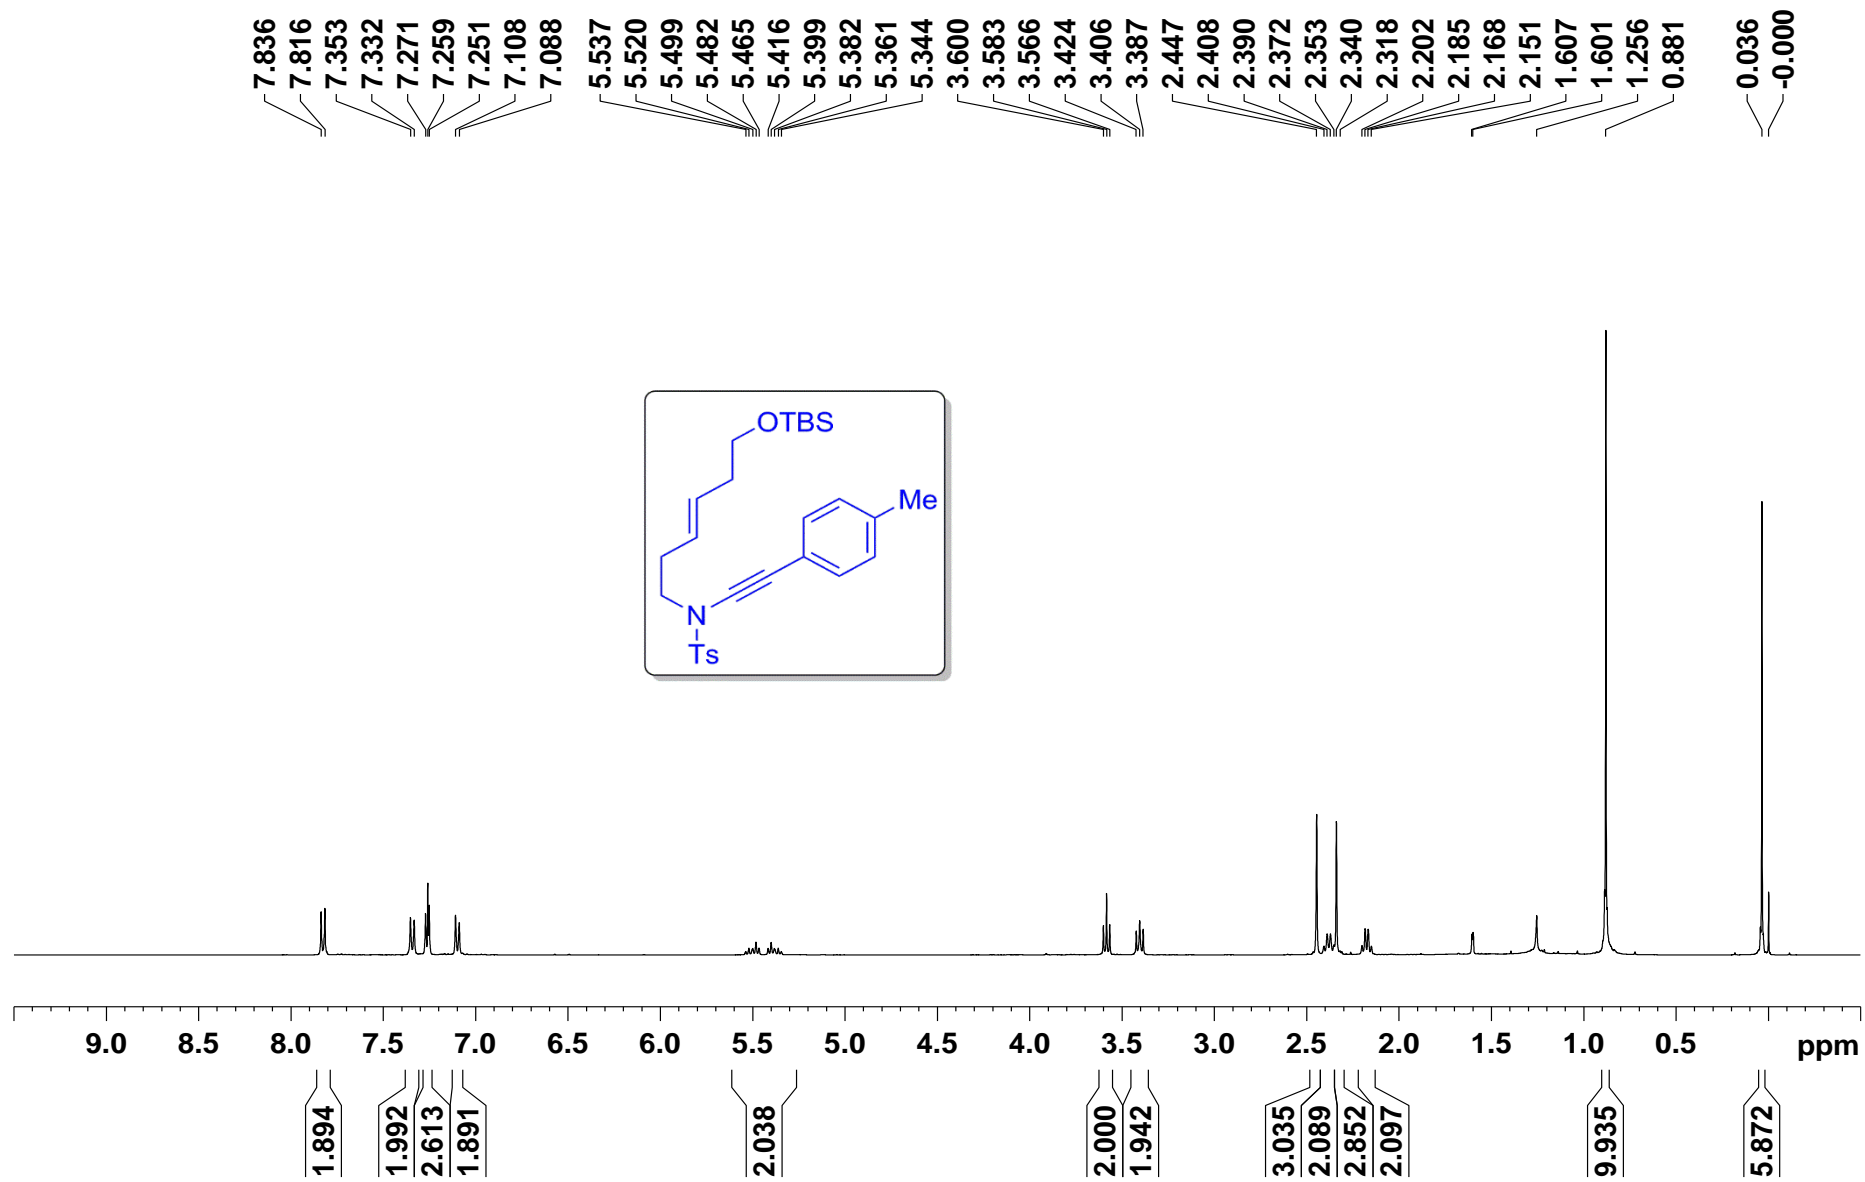

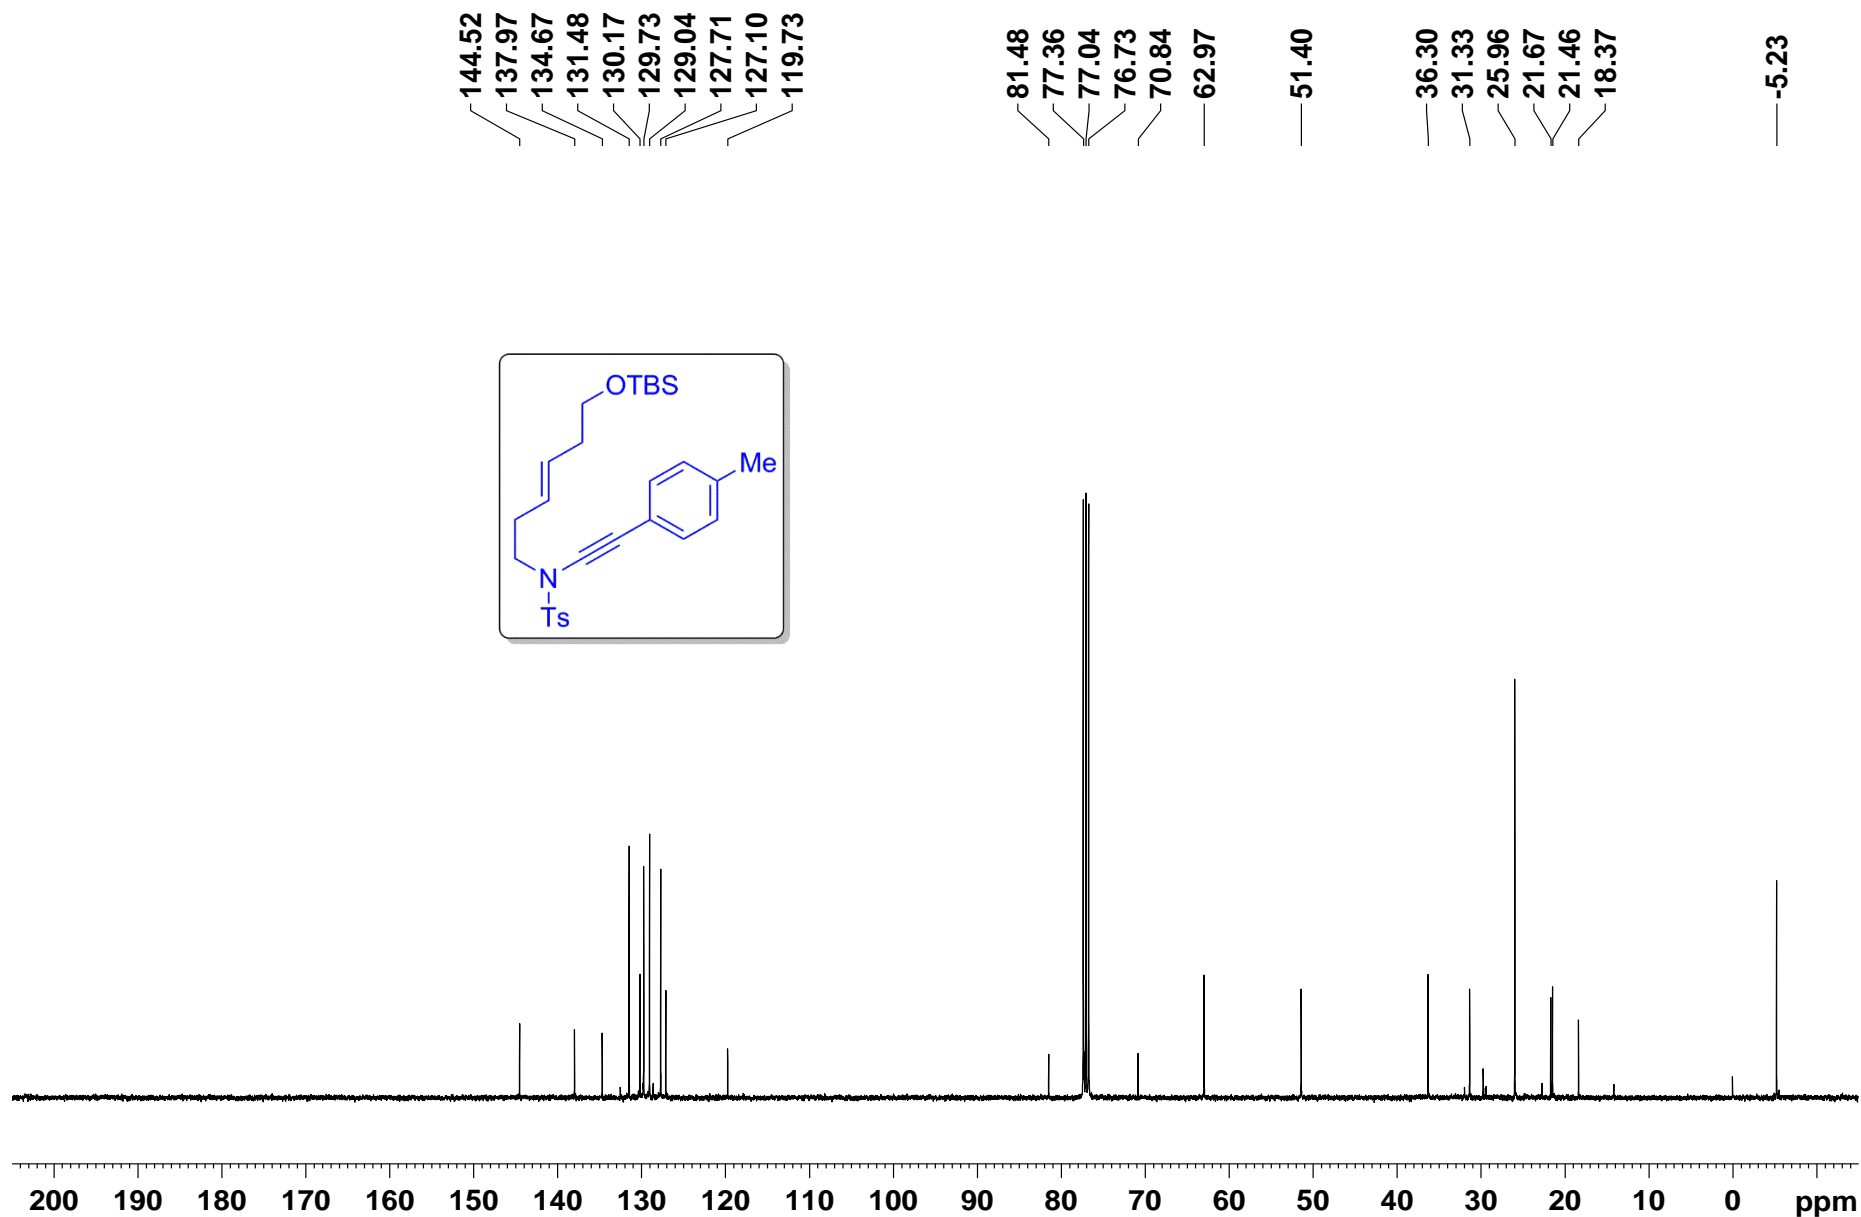

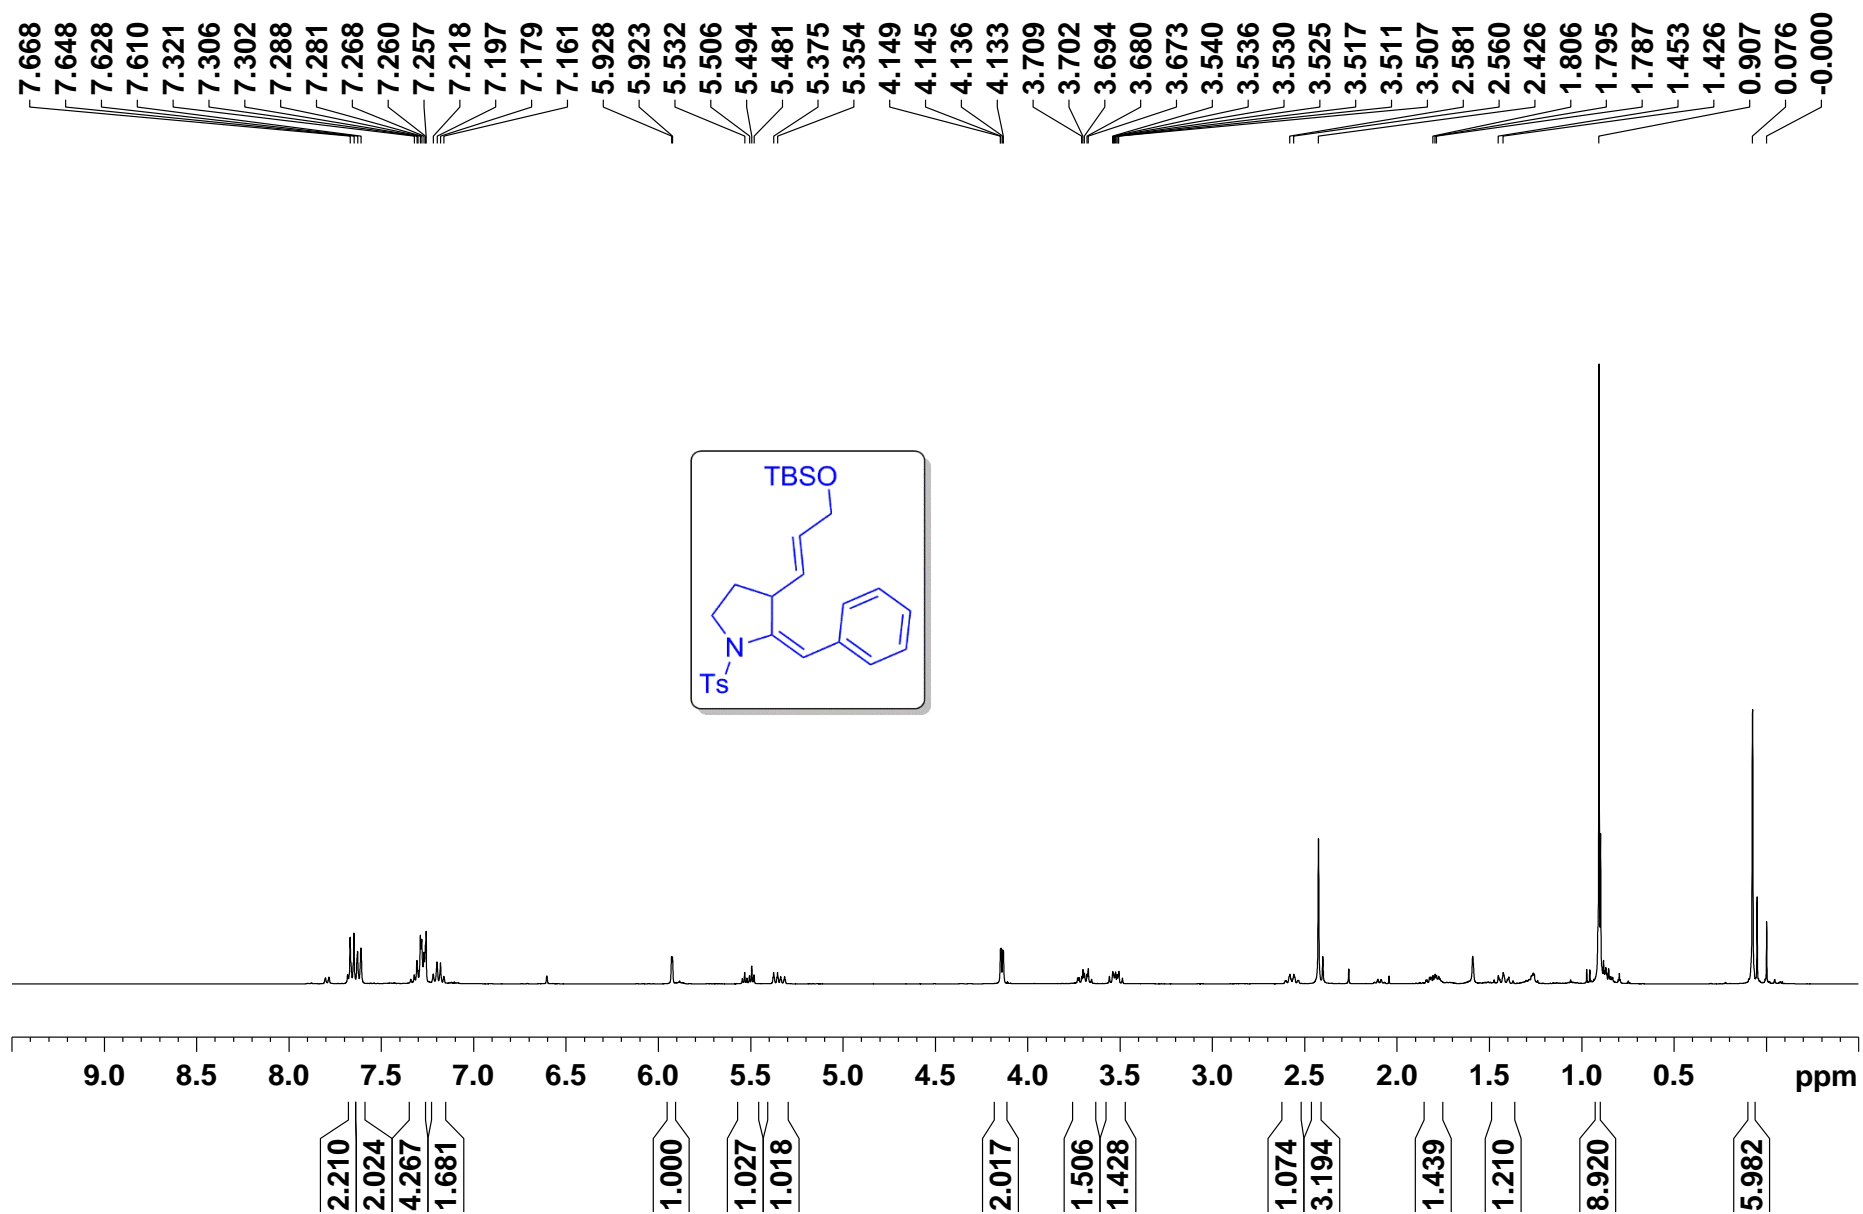



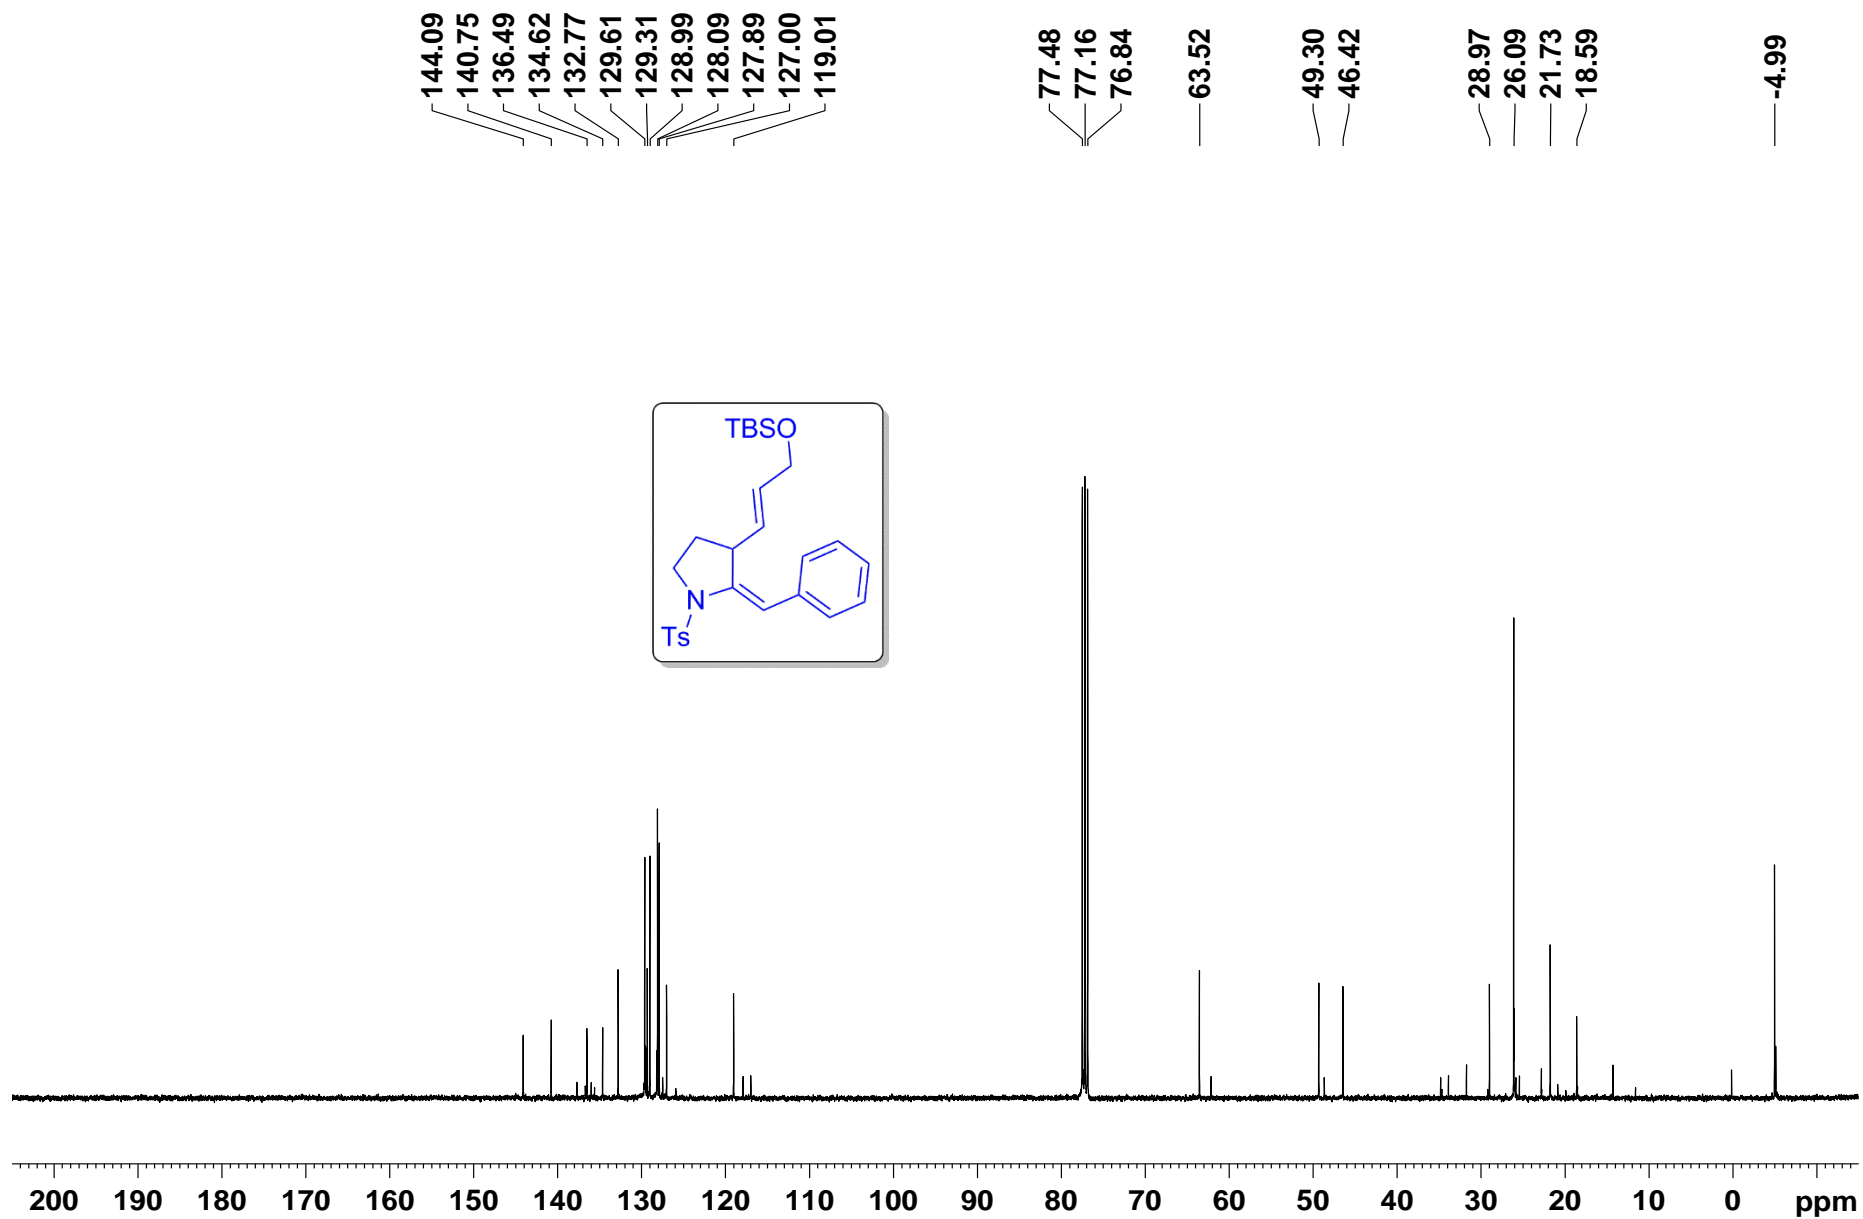

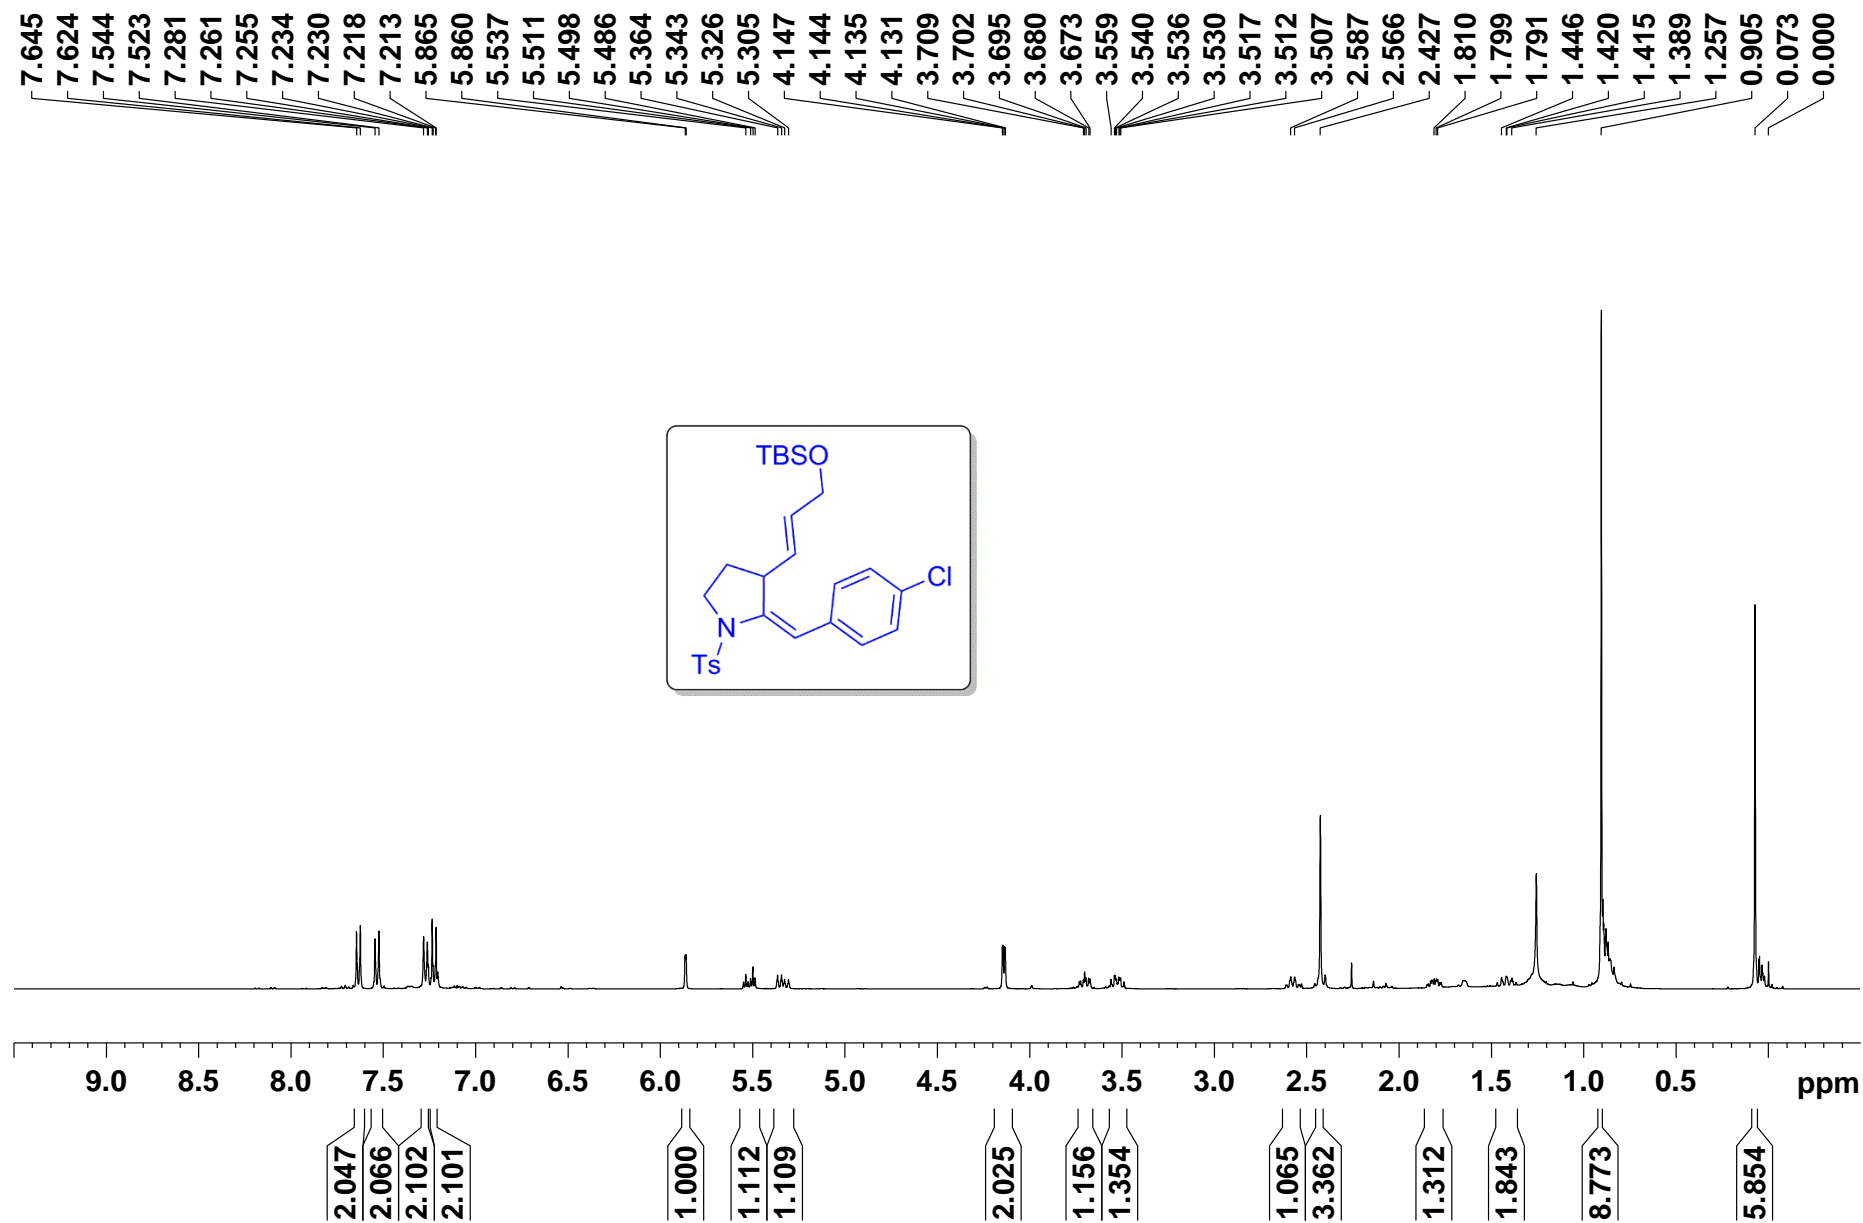

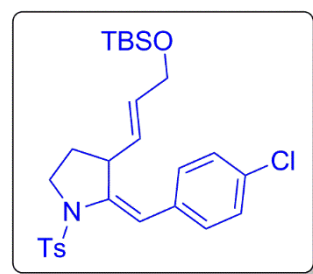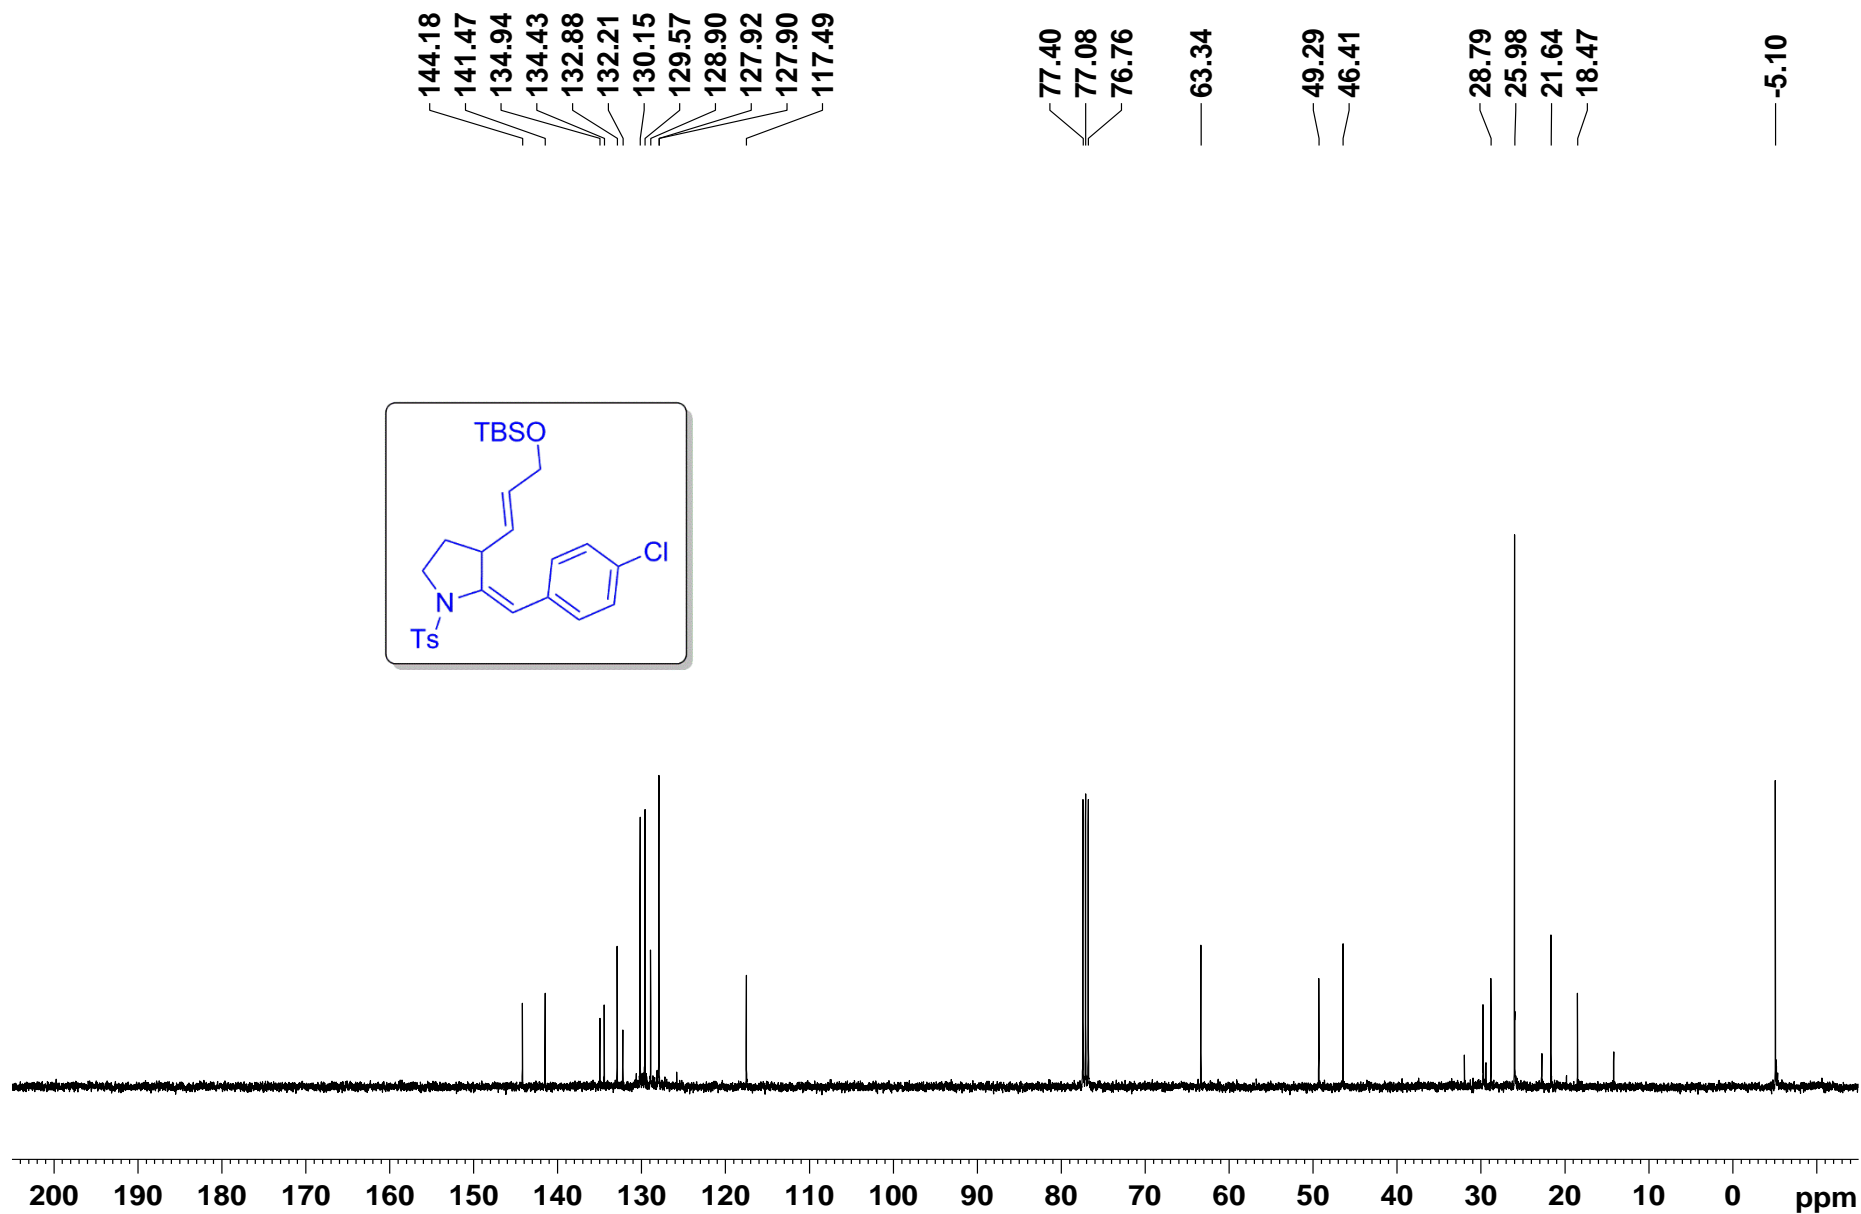

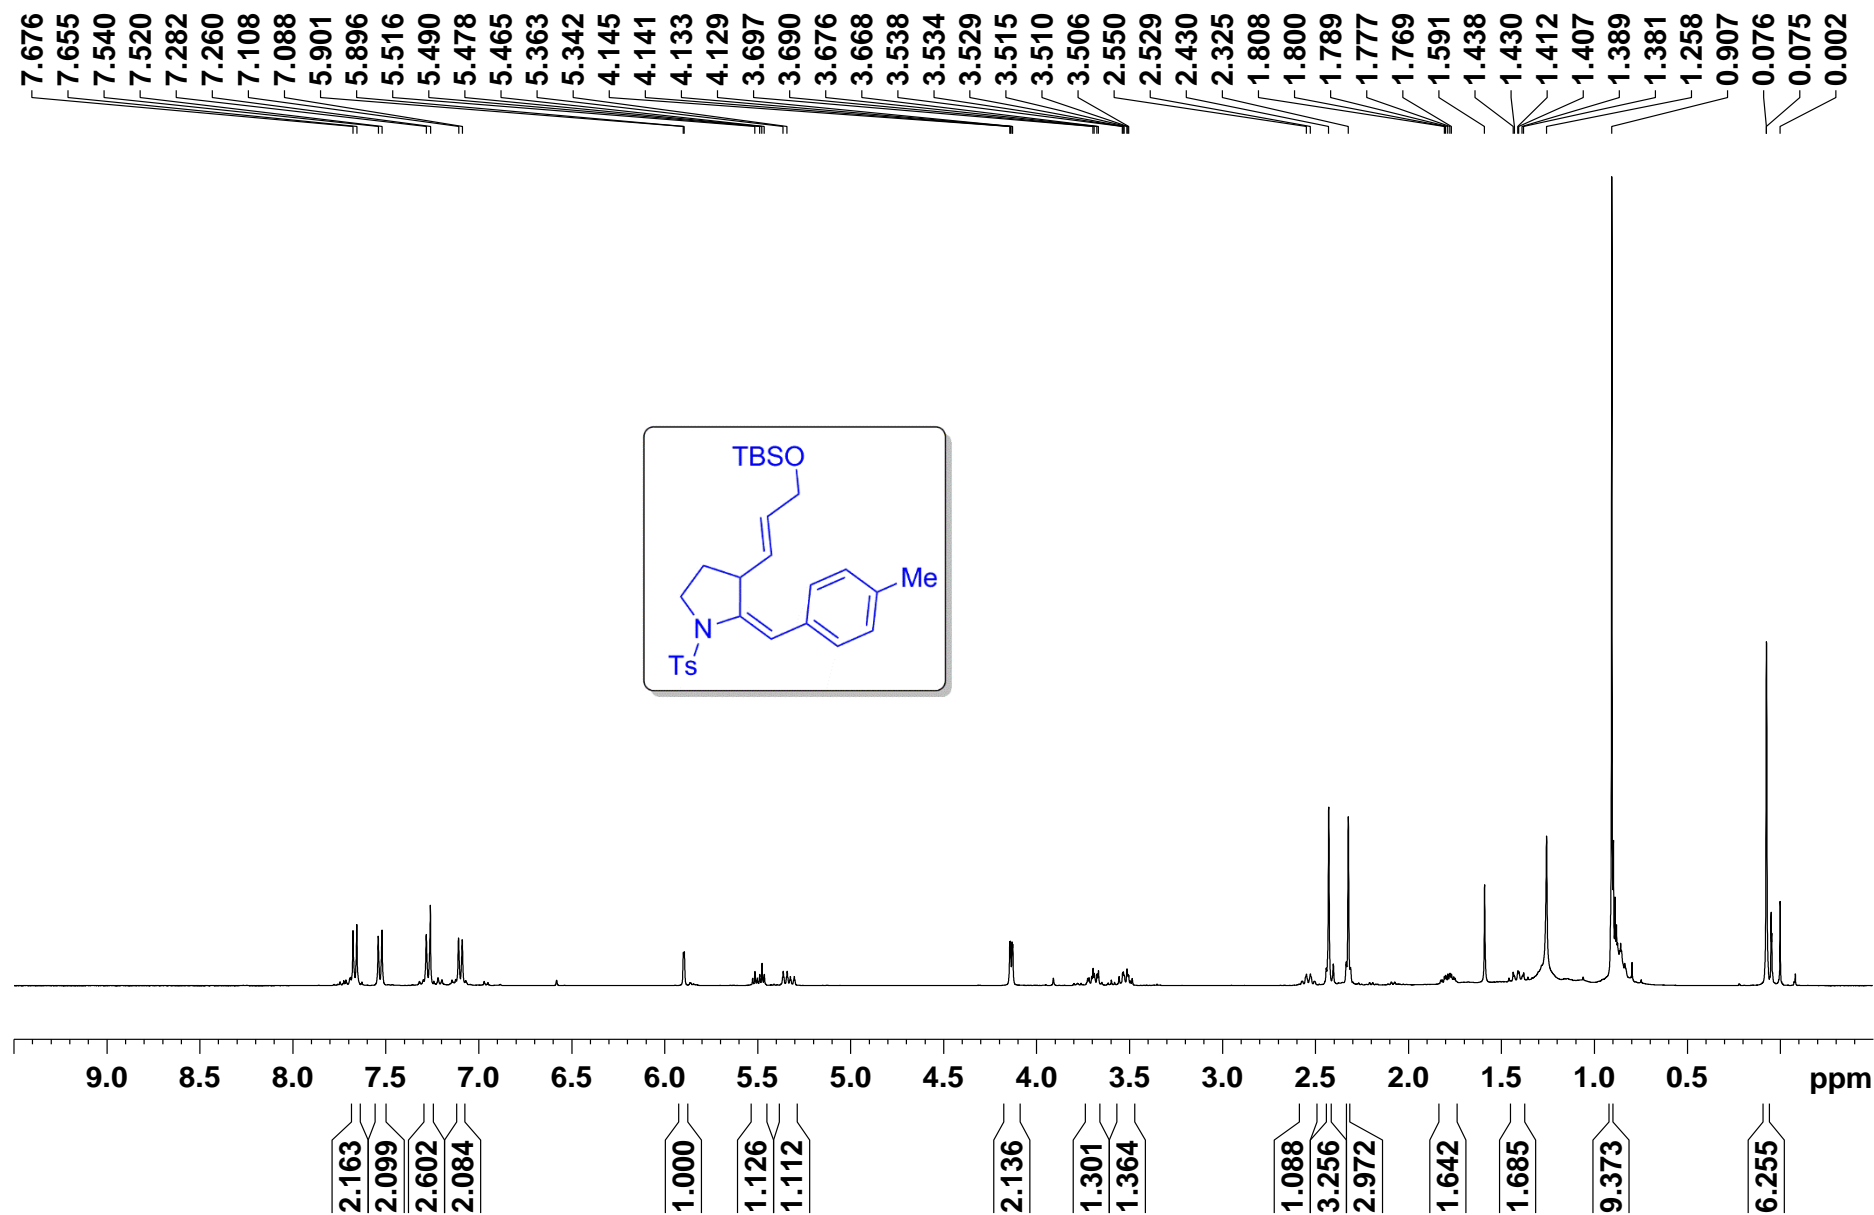

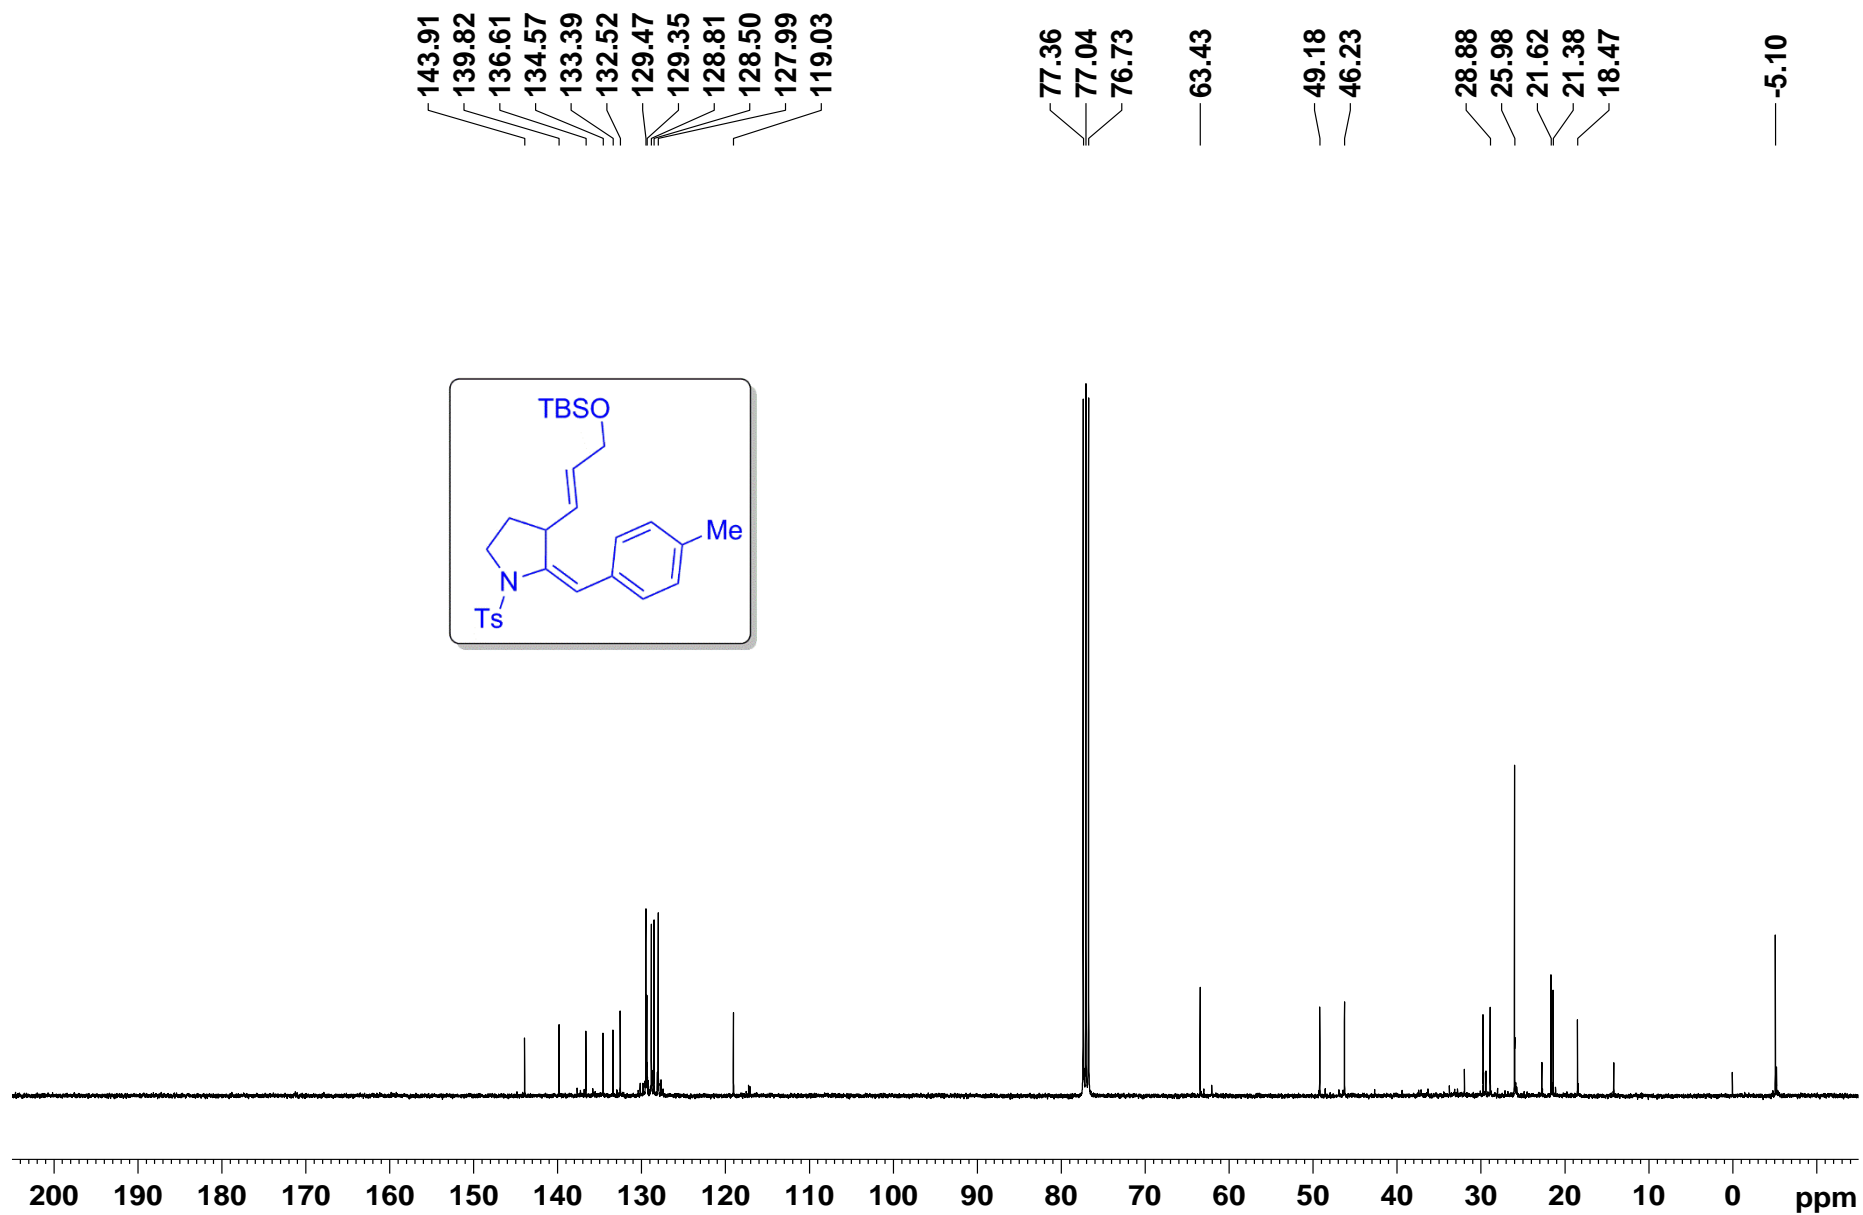

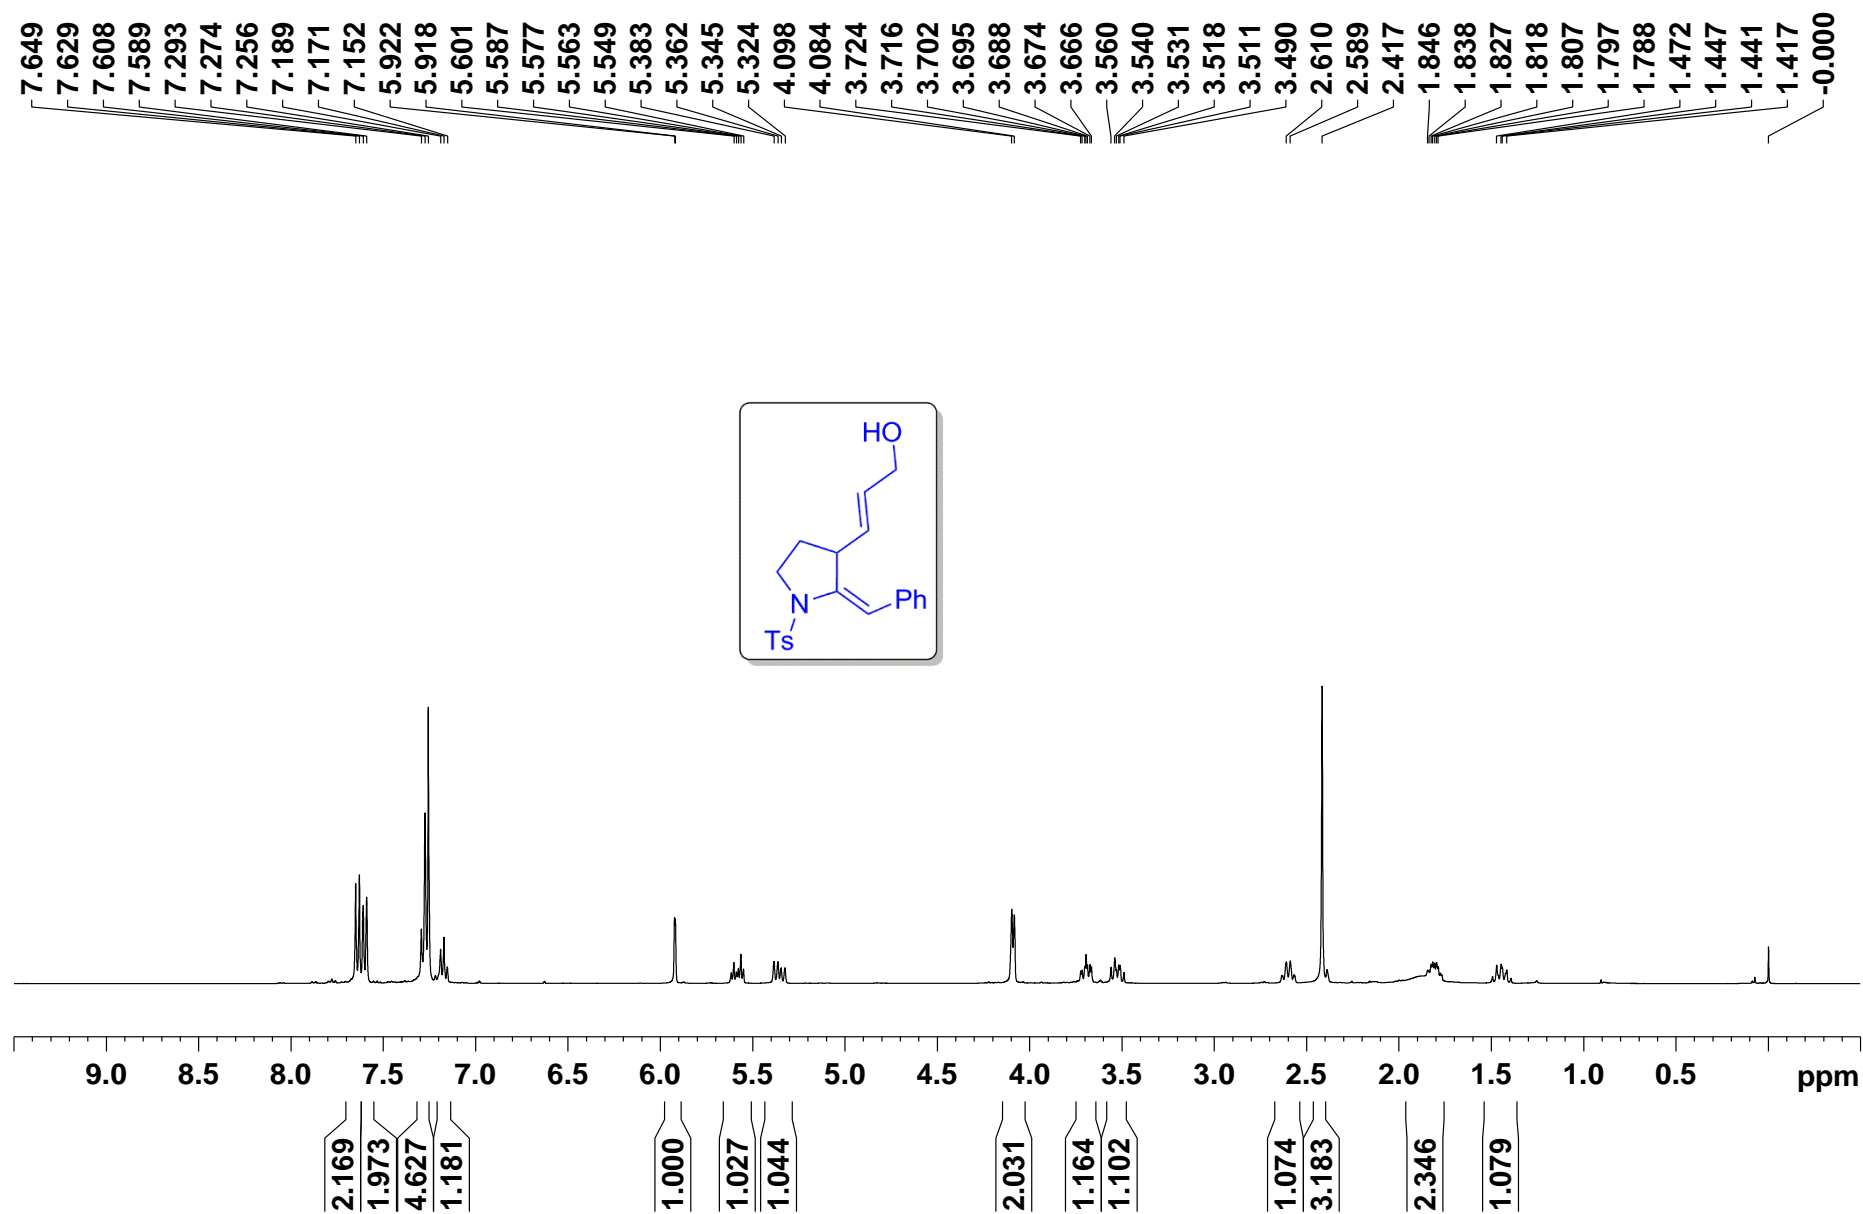

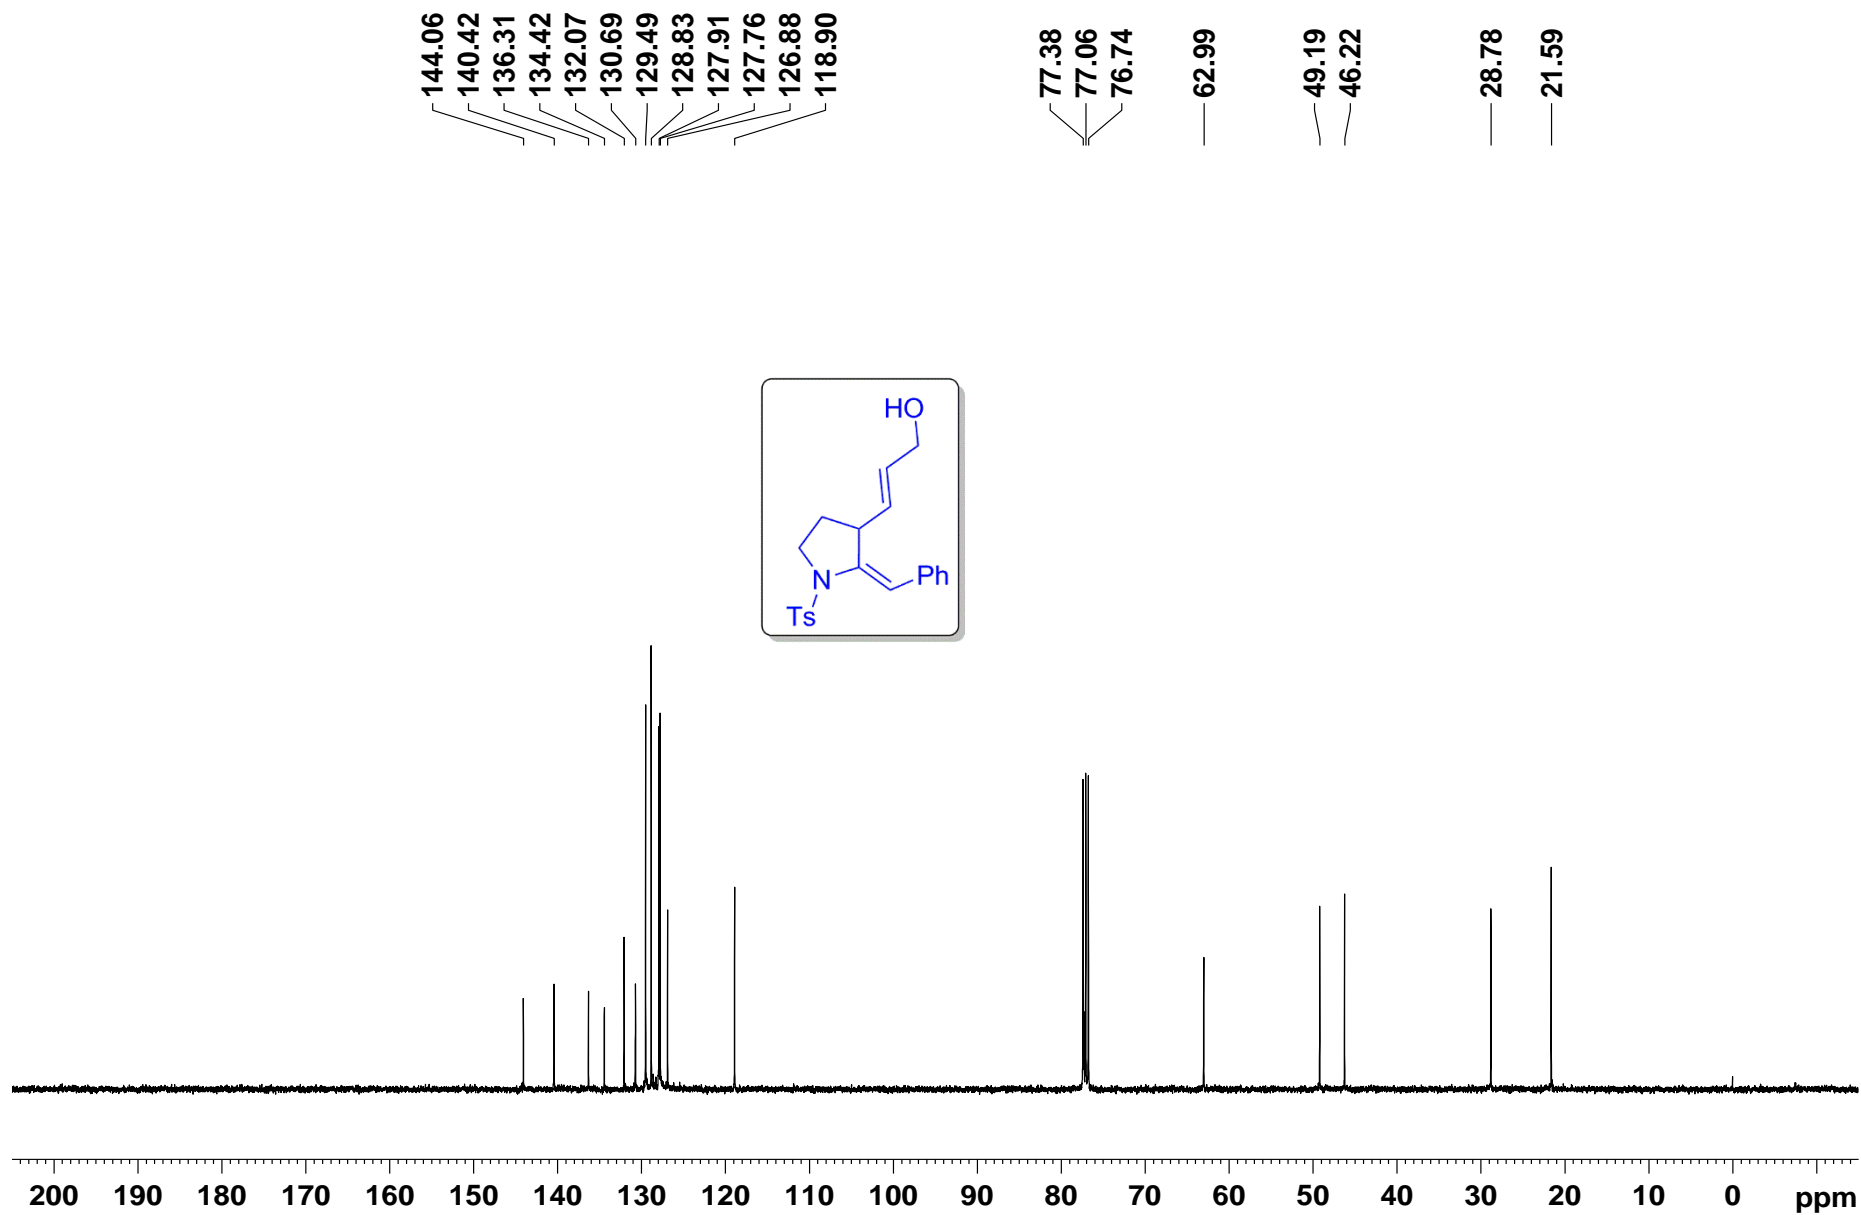

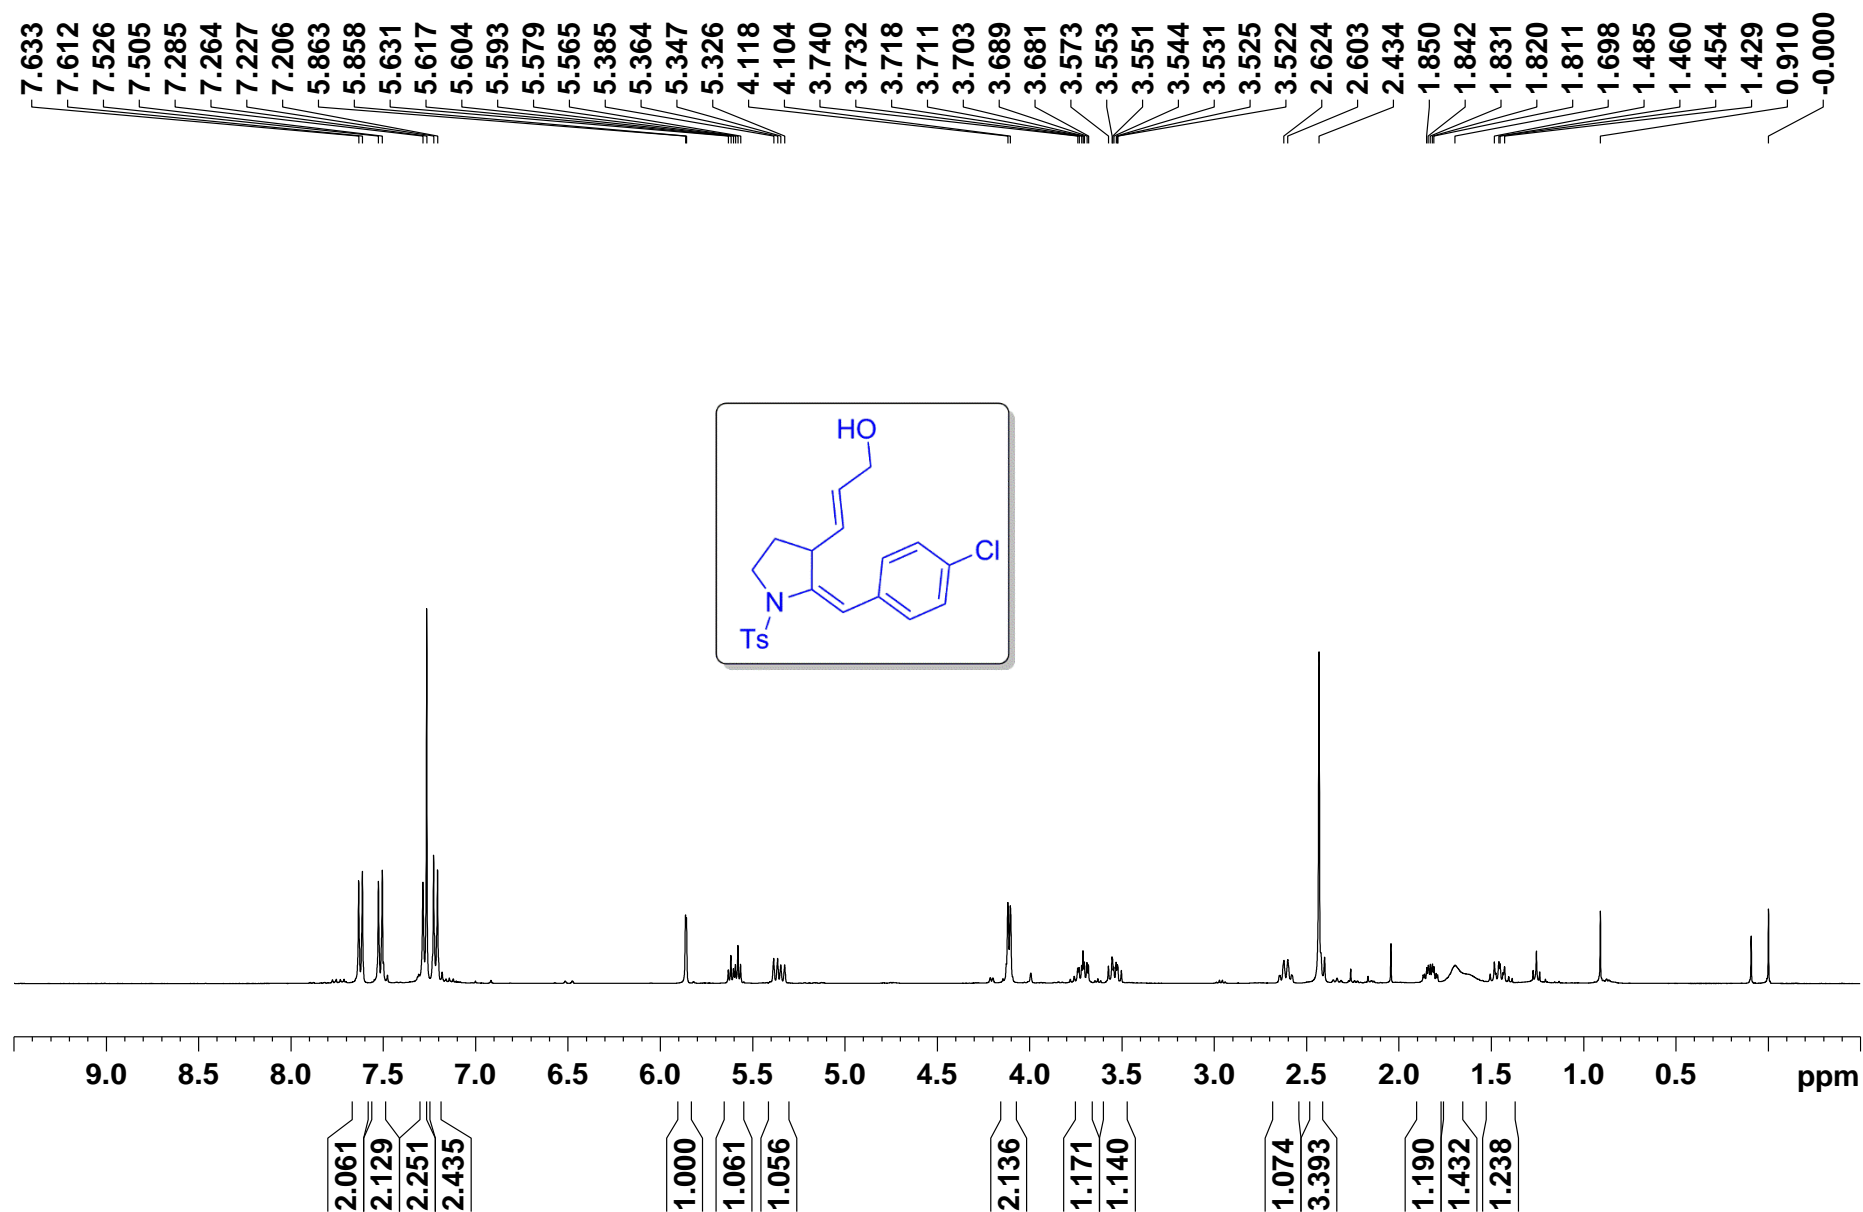



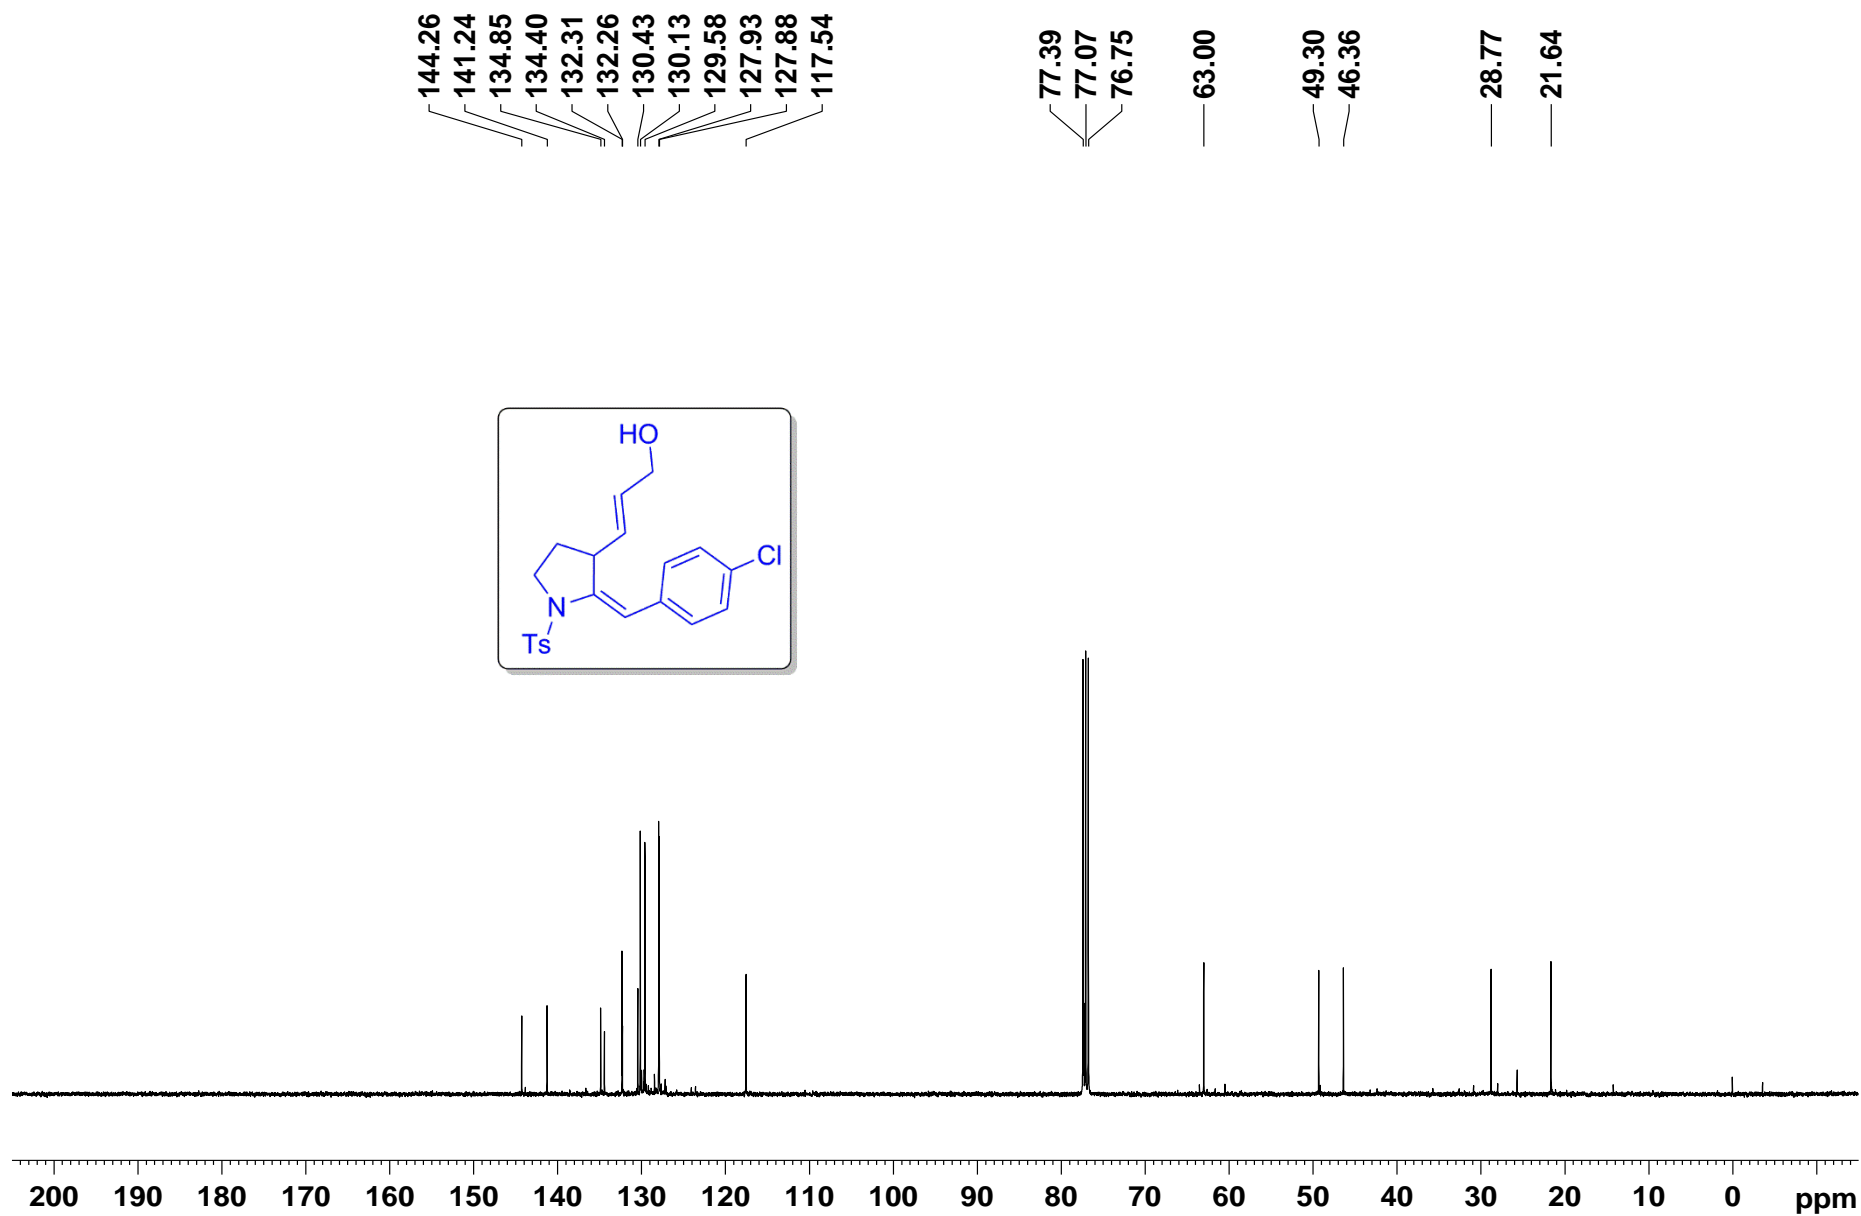

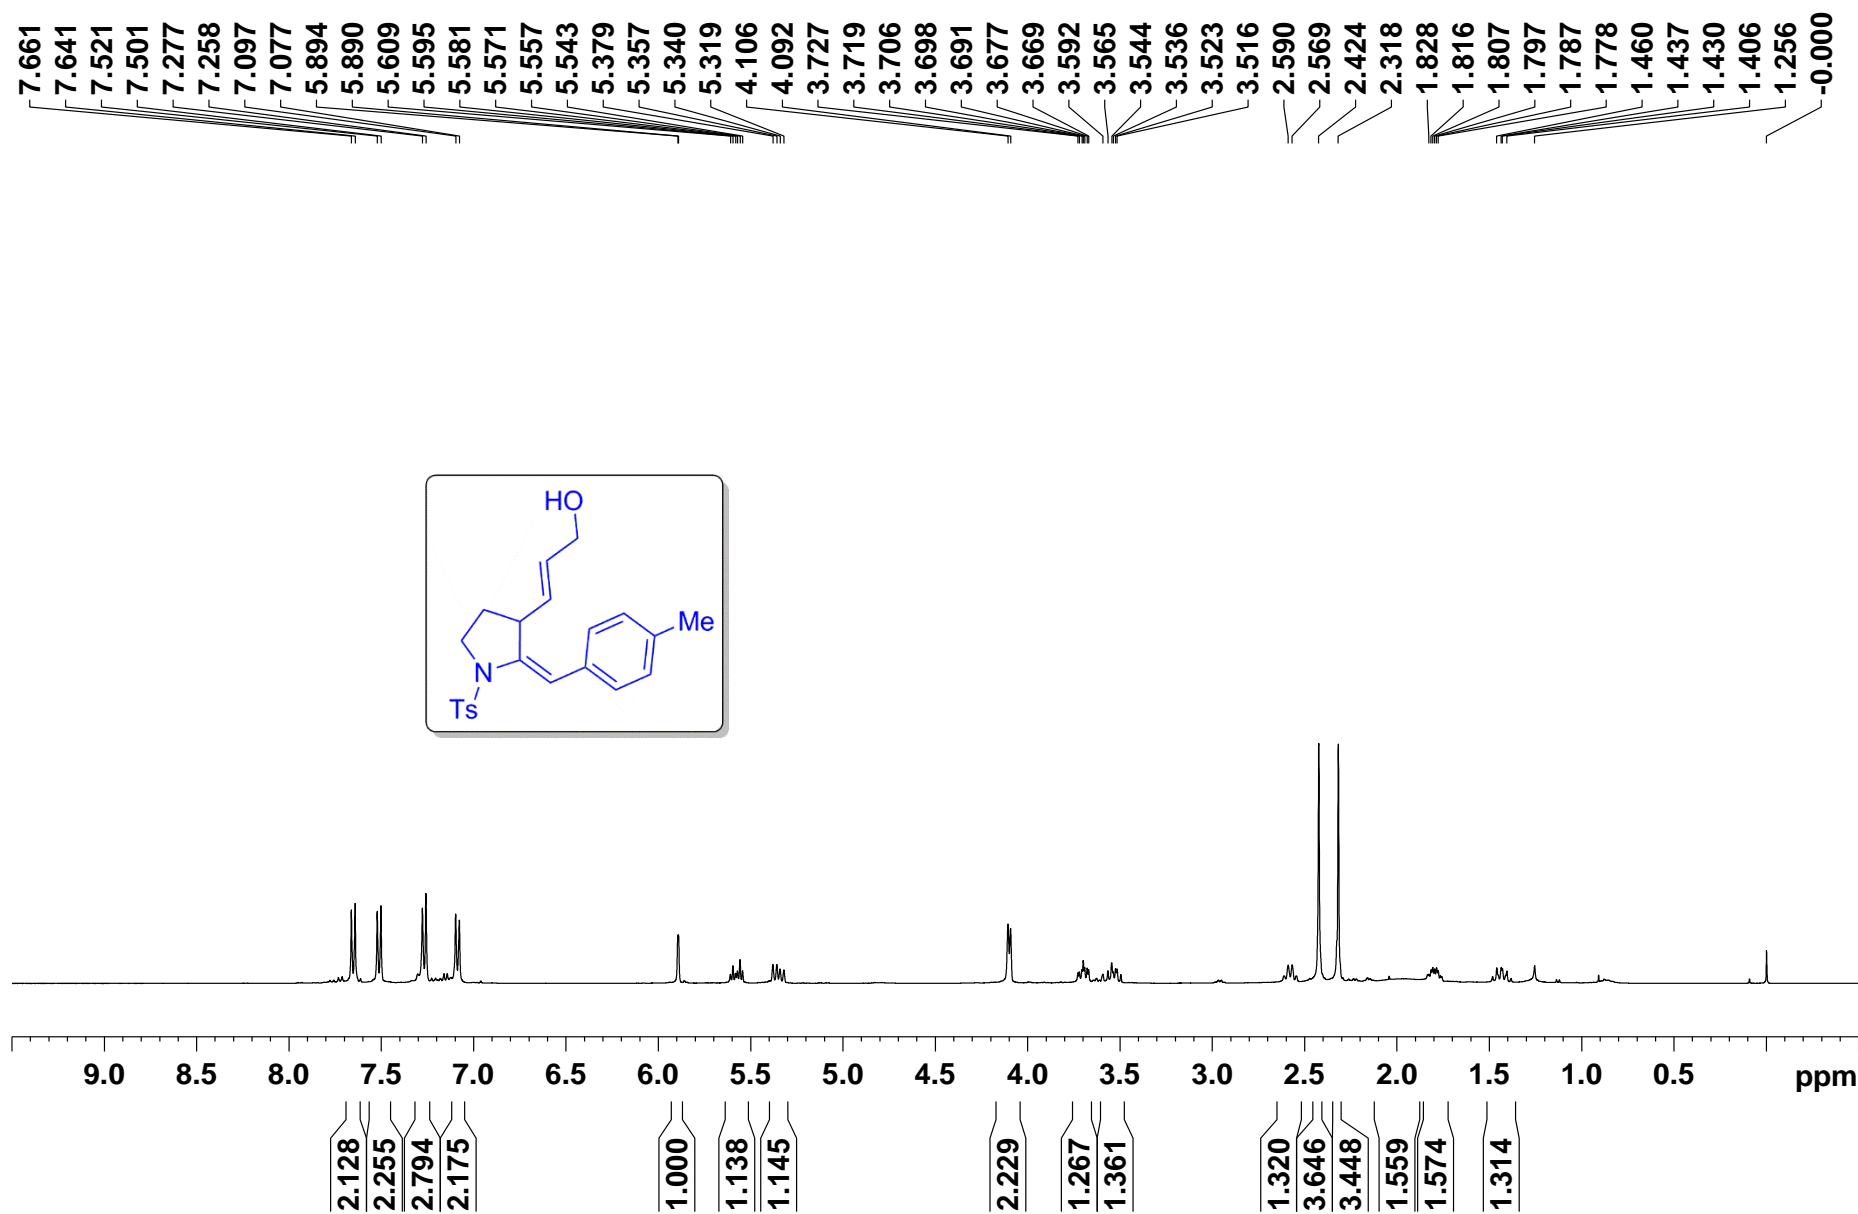

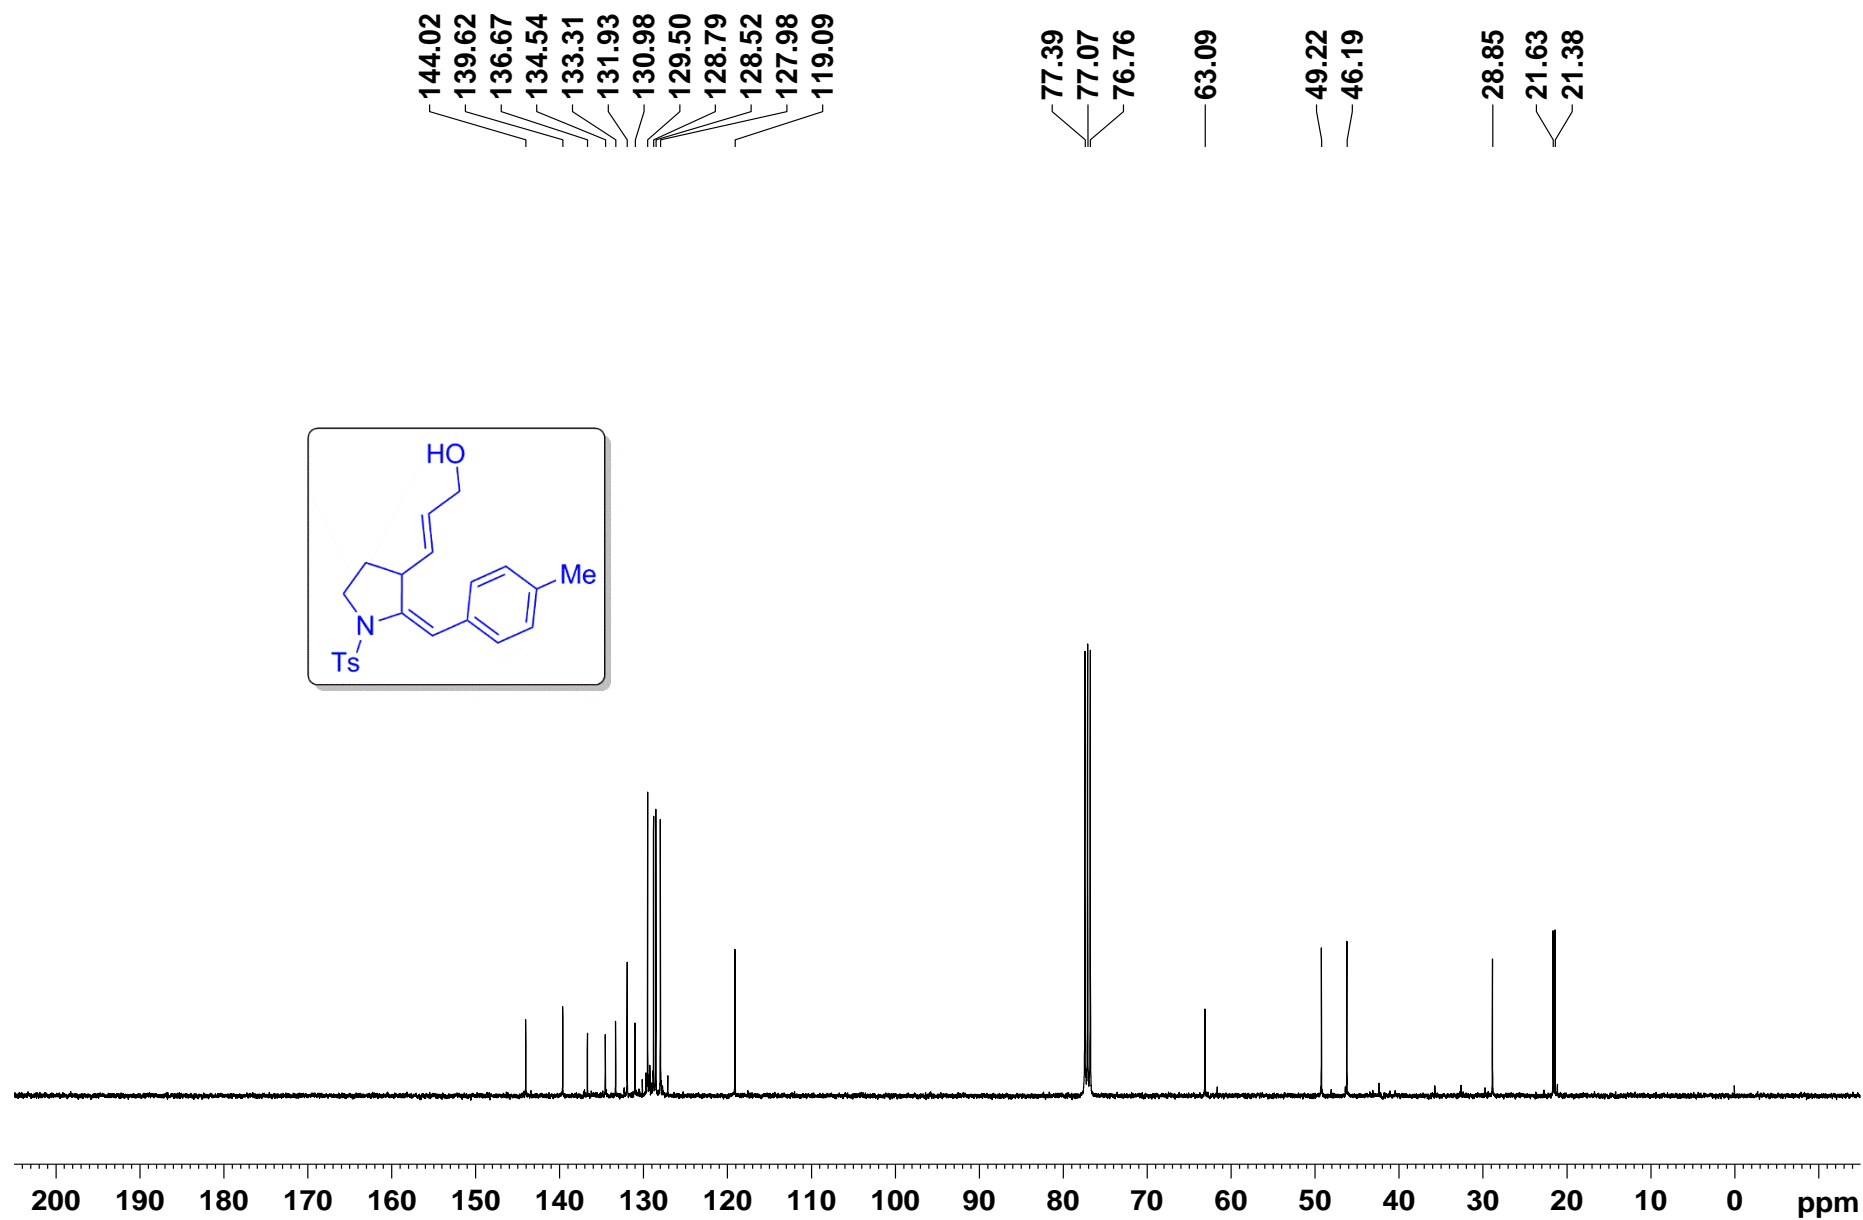

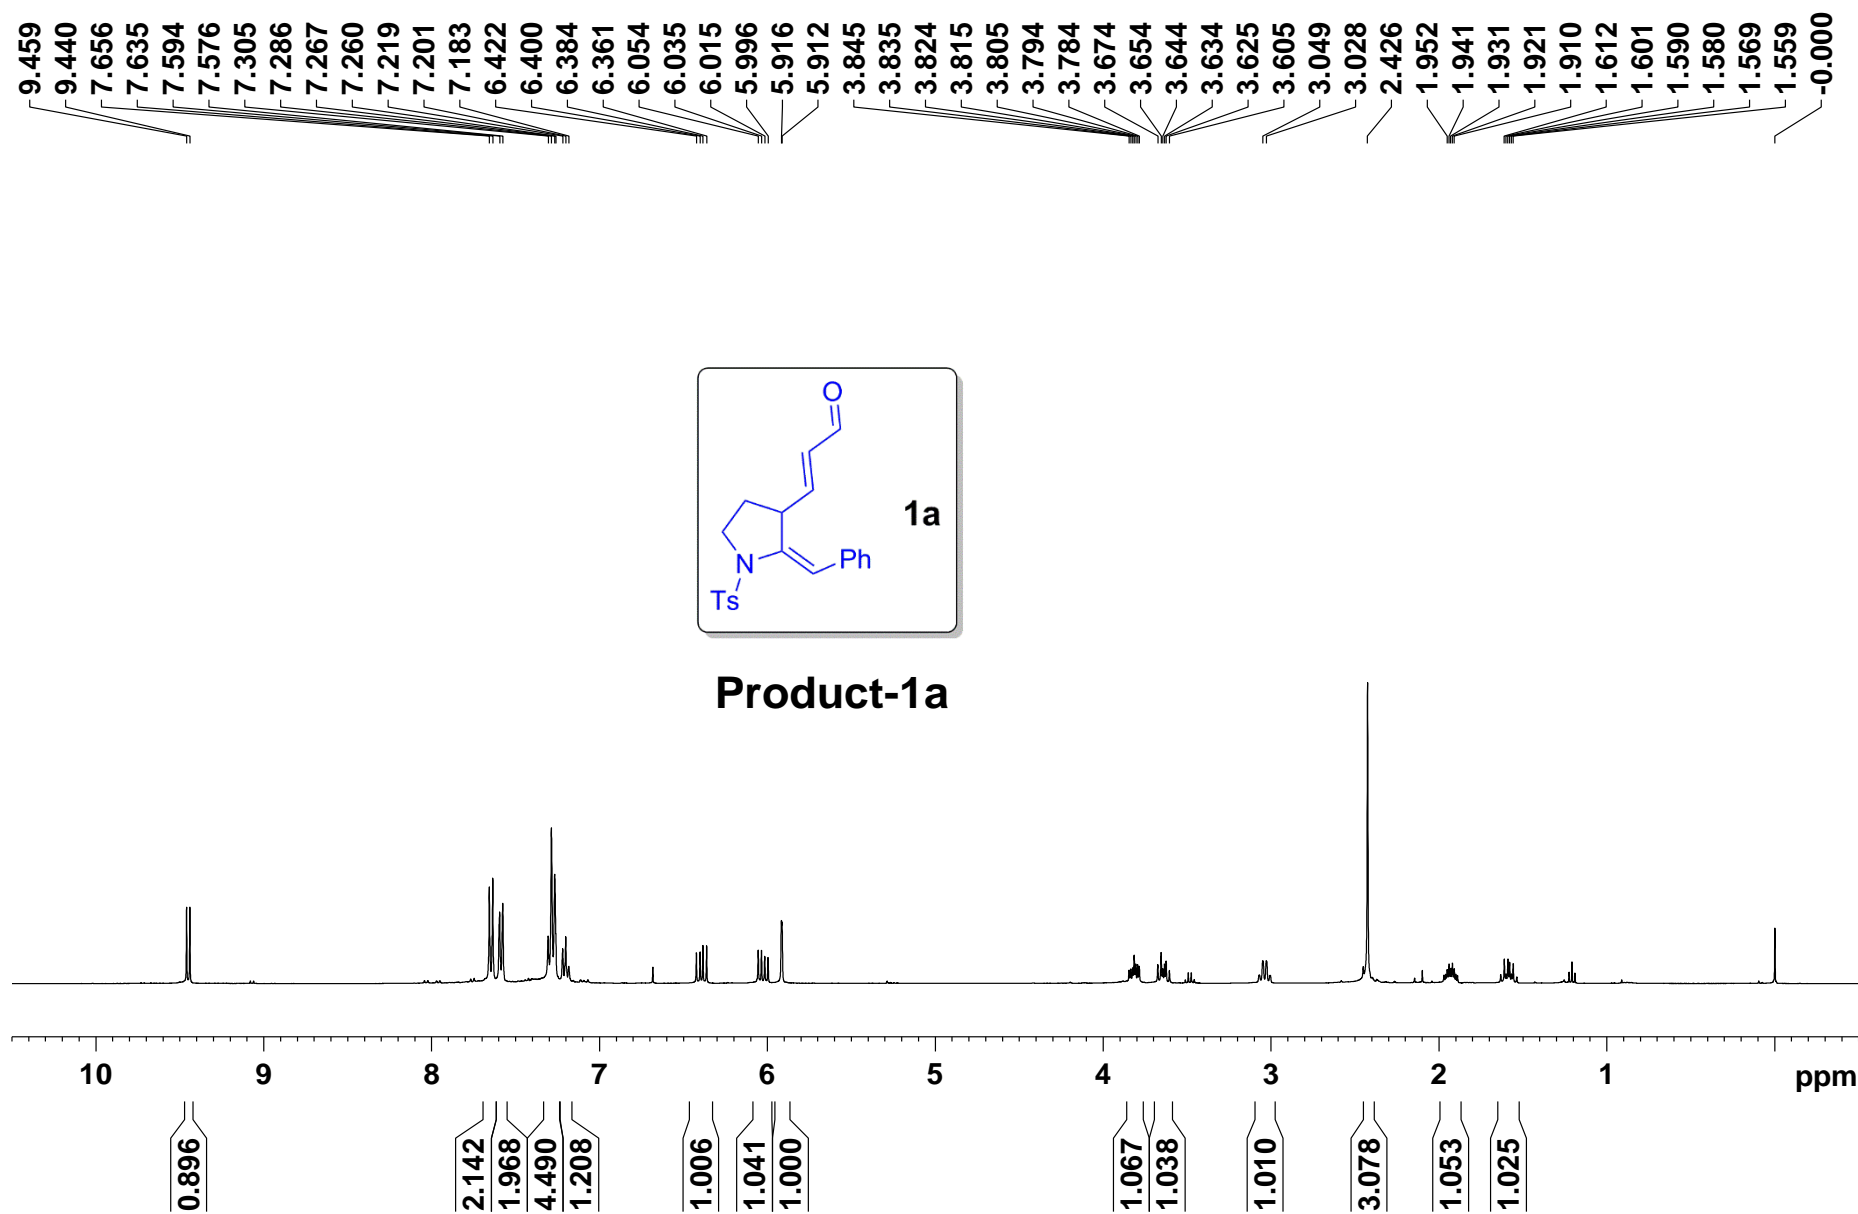

— 193.29

155.19  
144.58  
138.52  
135.72  
134.53  
133.80  
129.77  
128.96  
128.05  
127.97  
127.48  
120.77

77.47  
77.16  
76.84

49.76  
46.57

28.46  
21.70

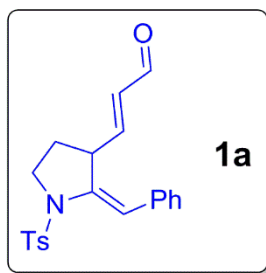

**Product-1a**

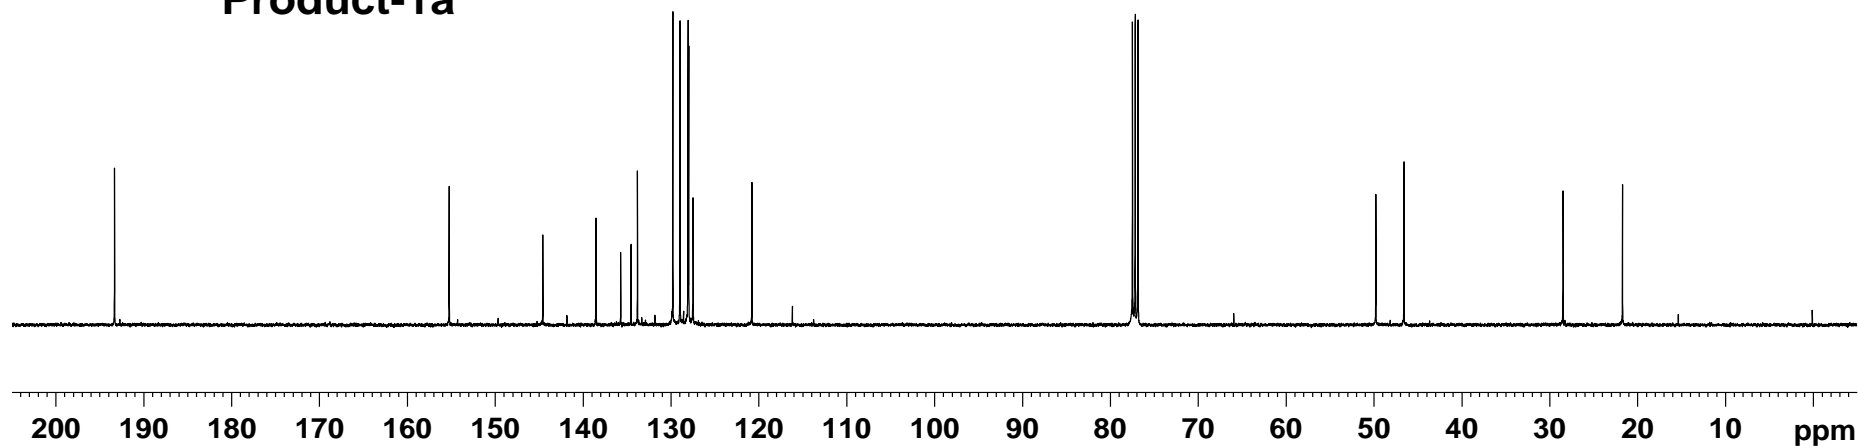

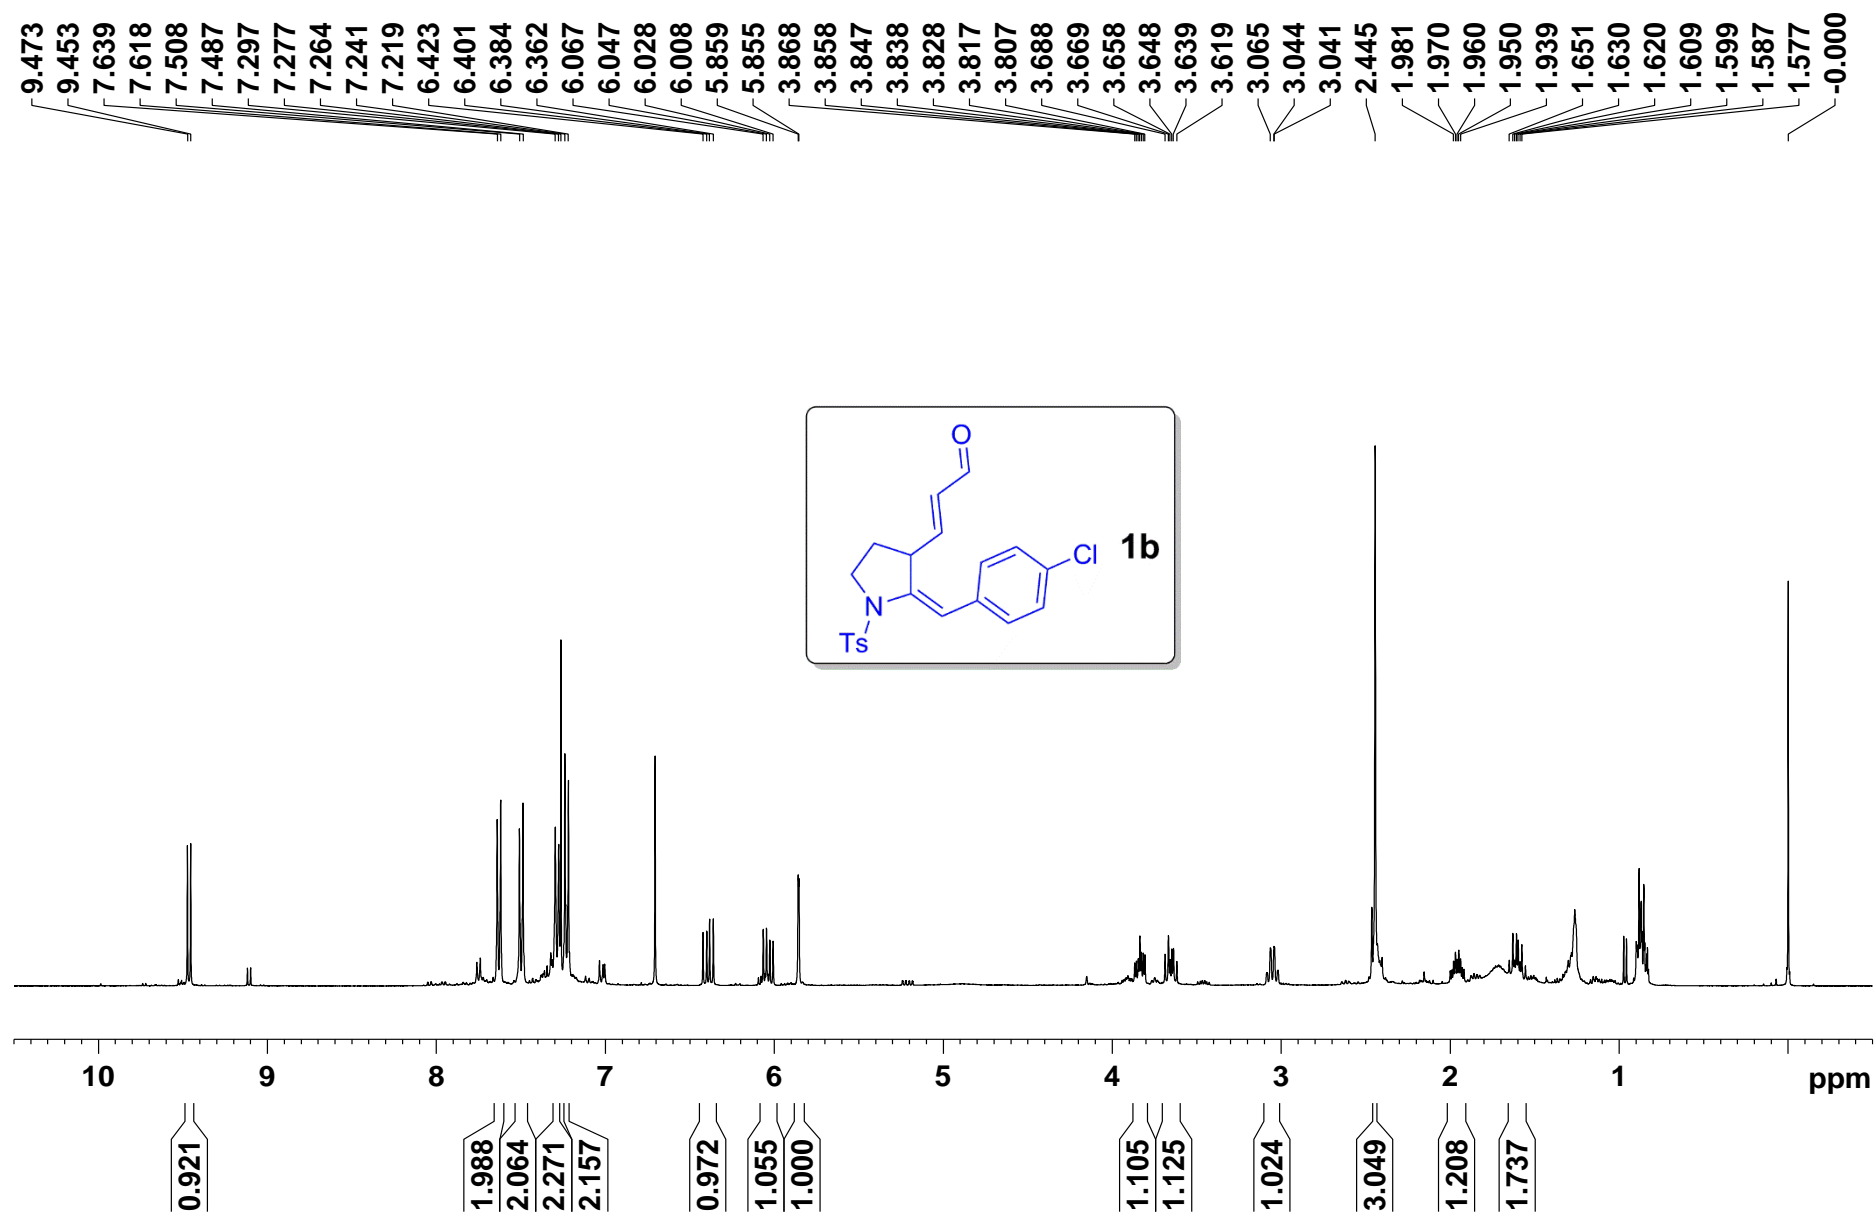

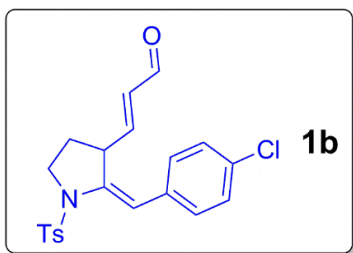

**Product-1b**

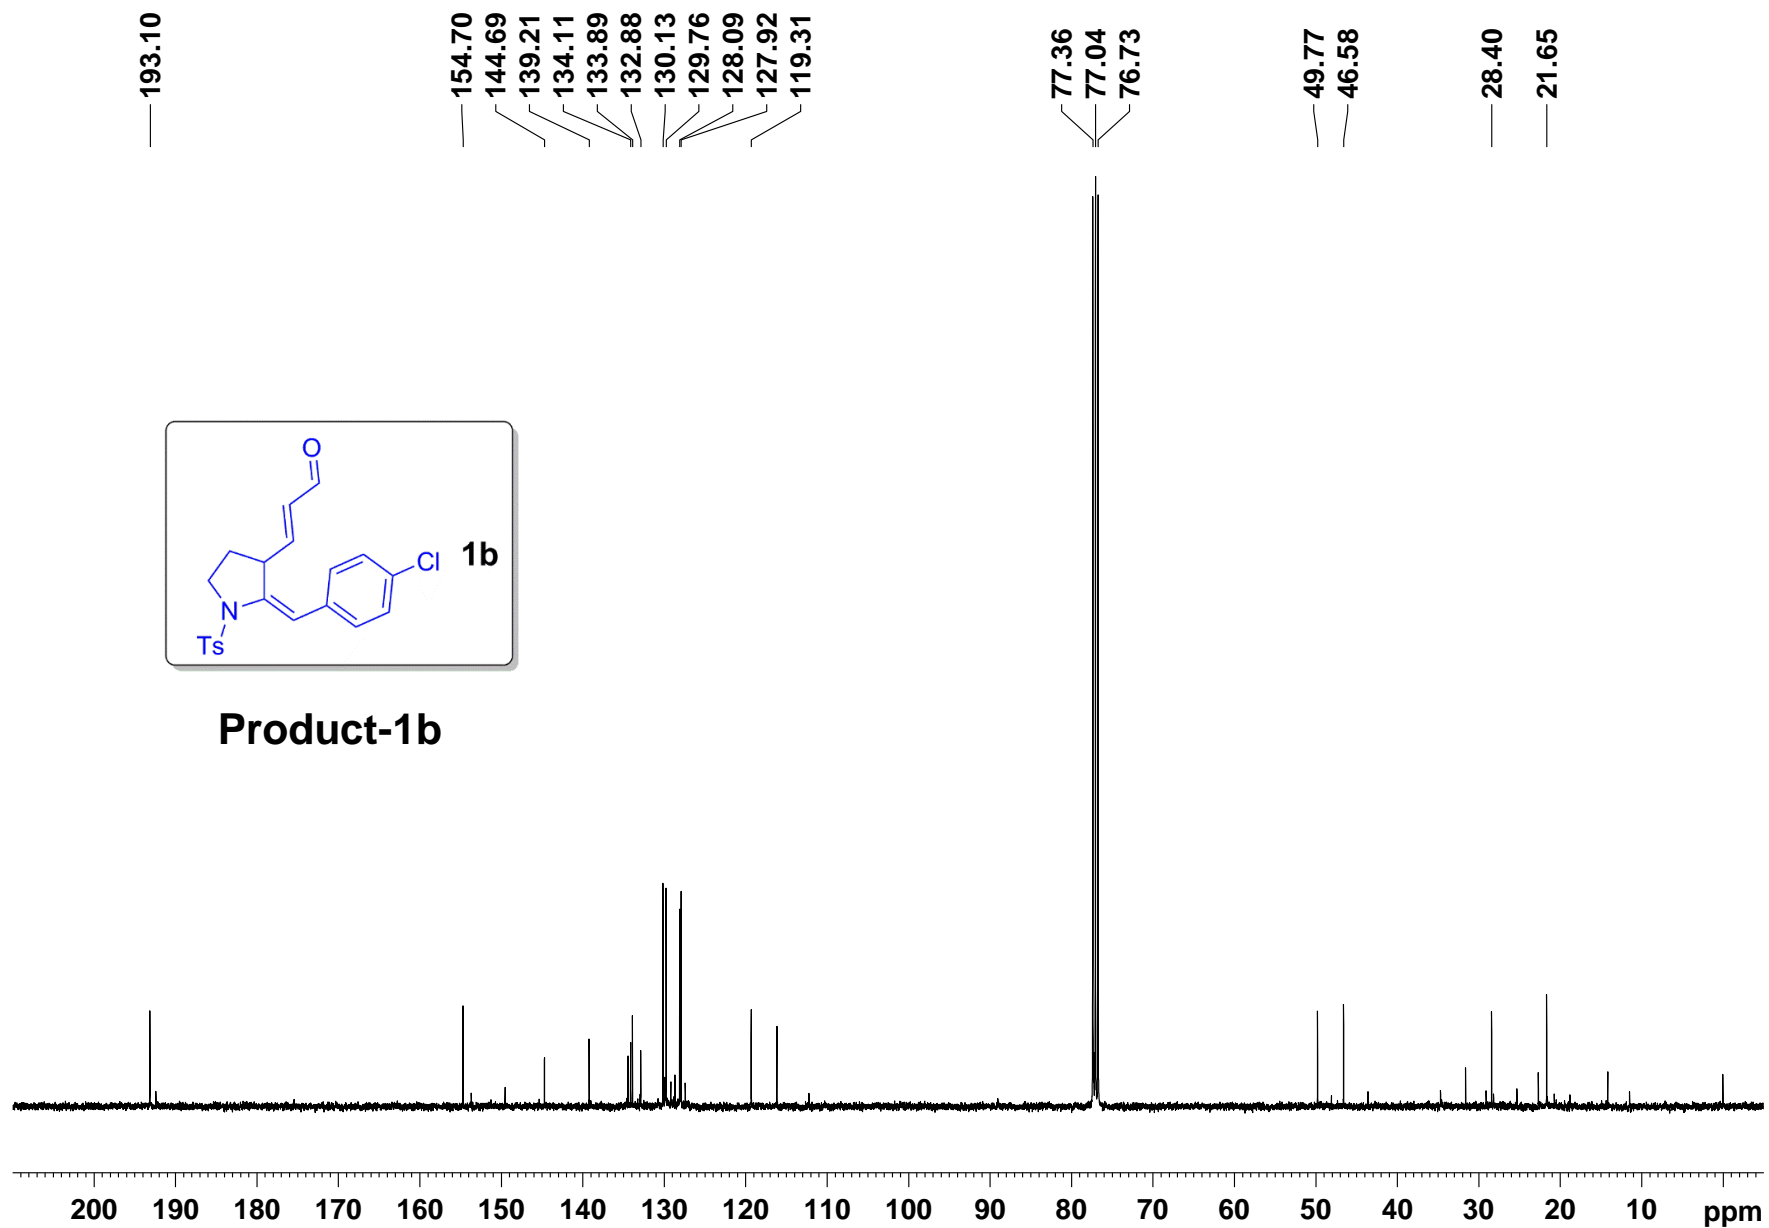

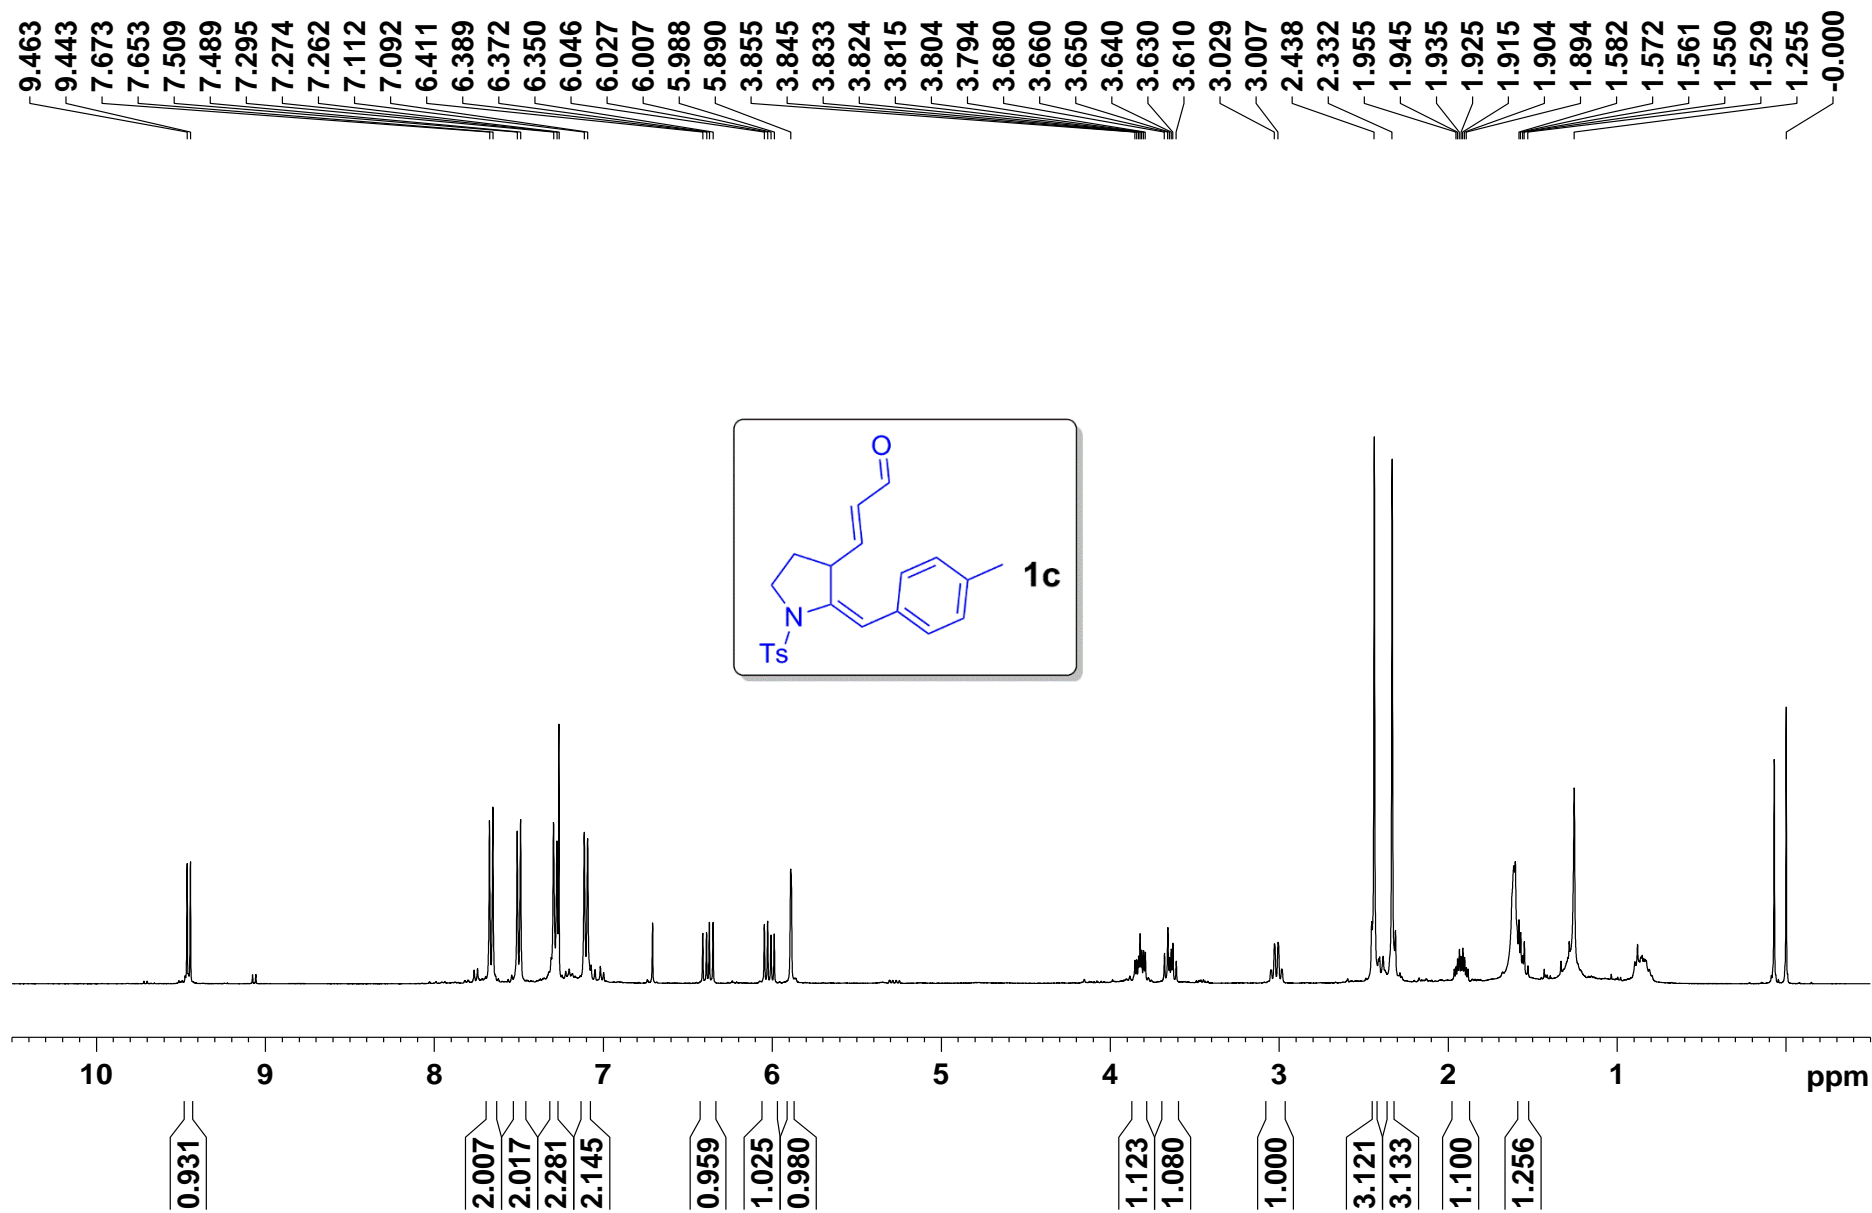



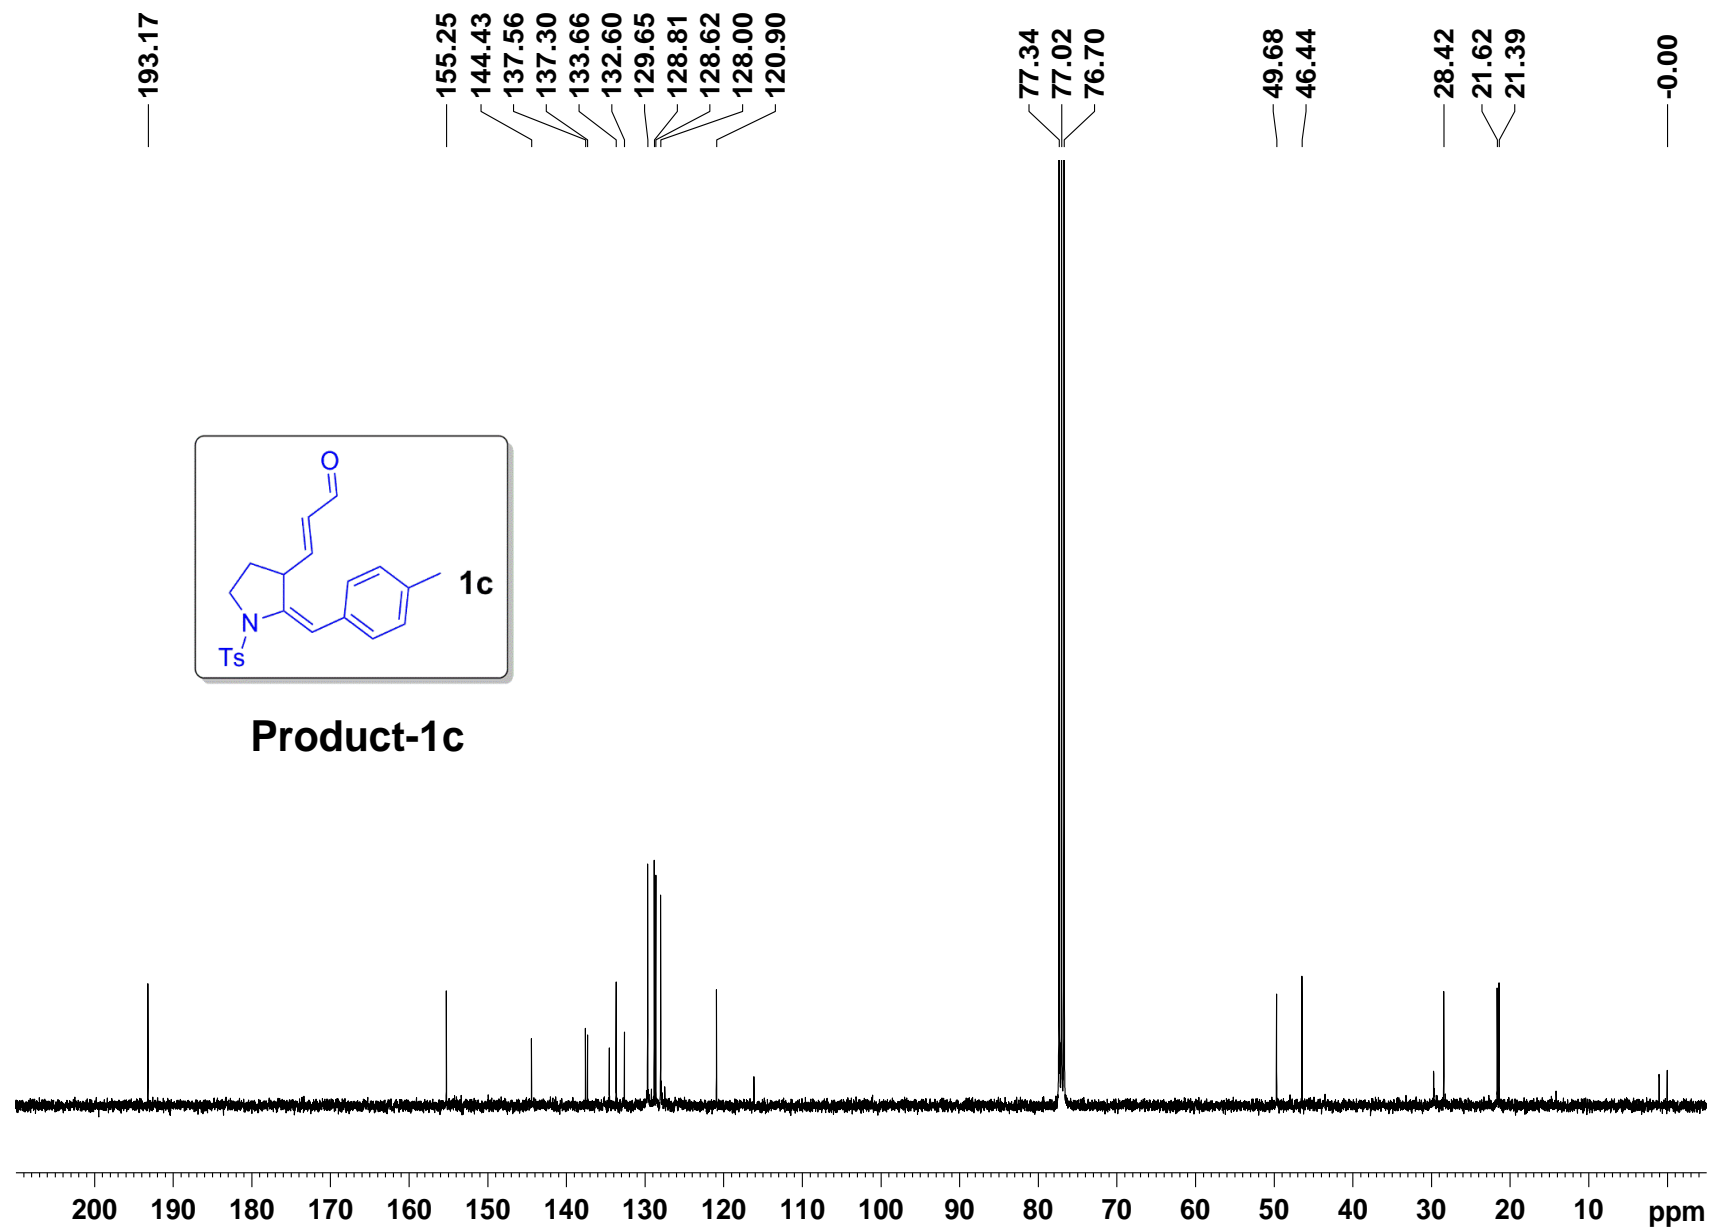

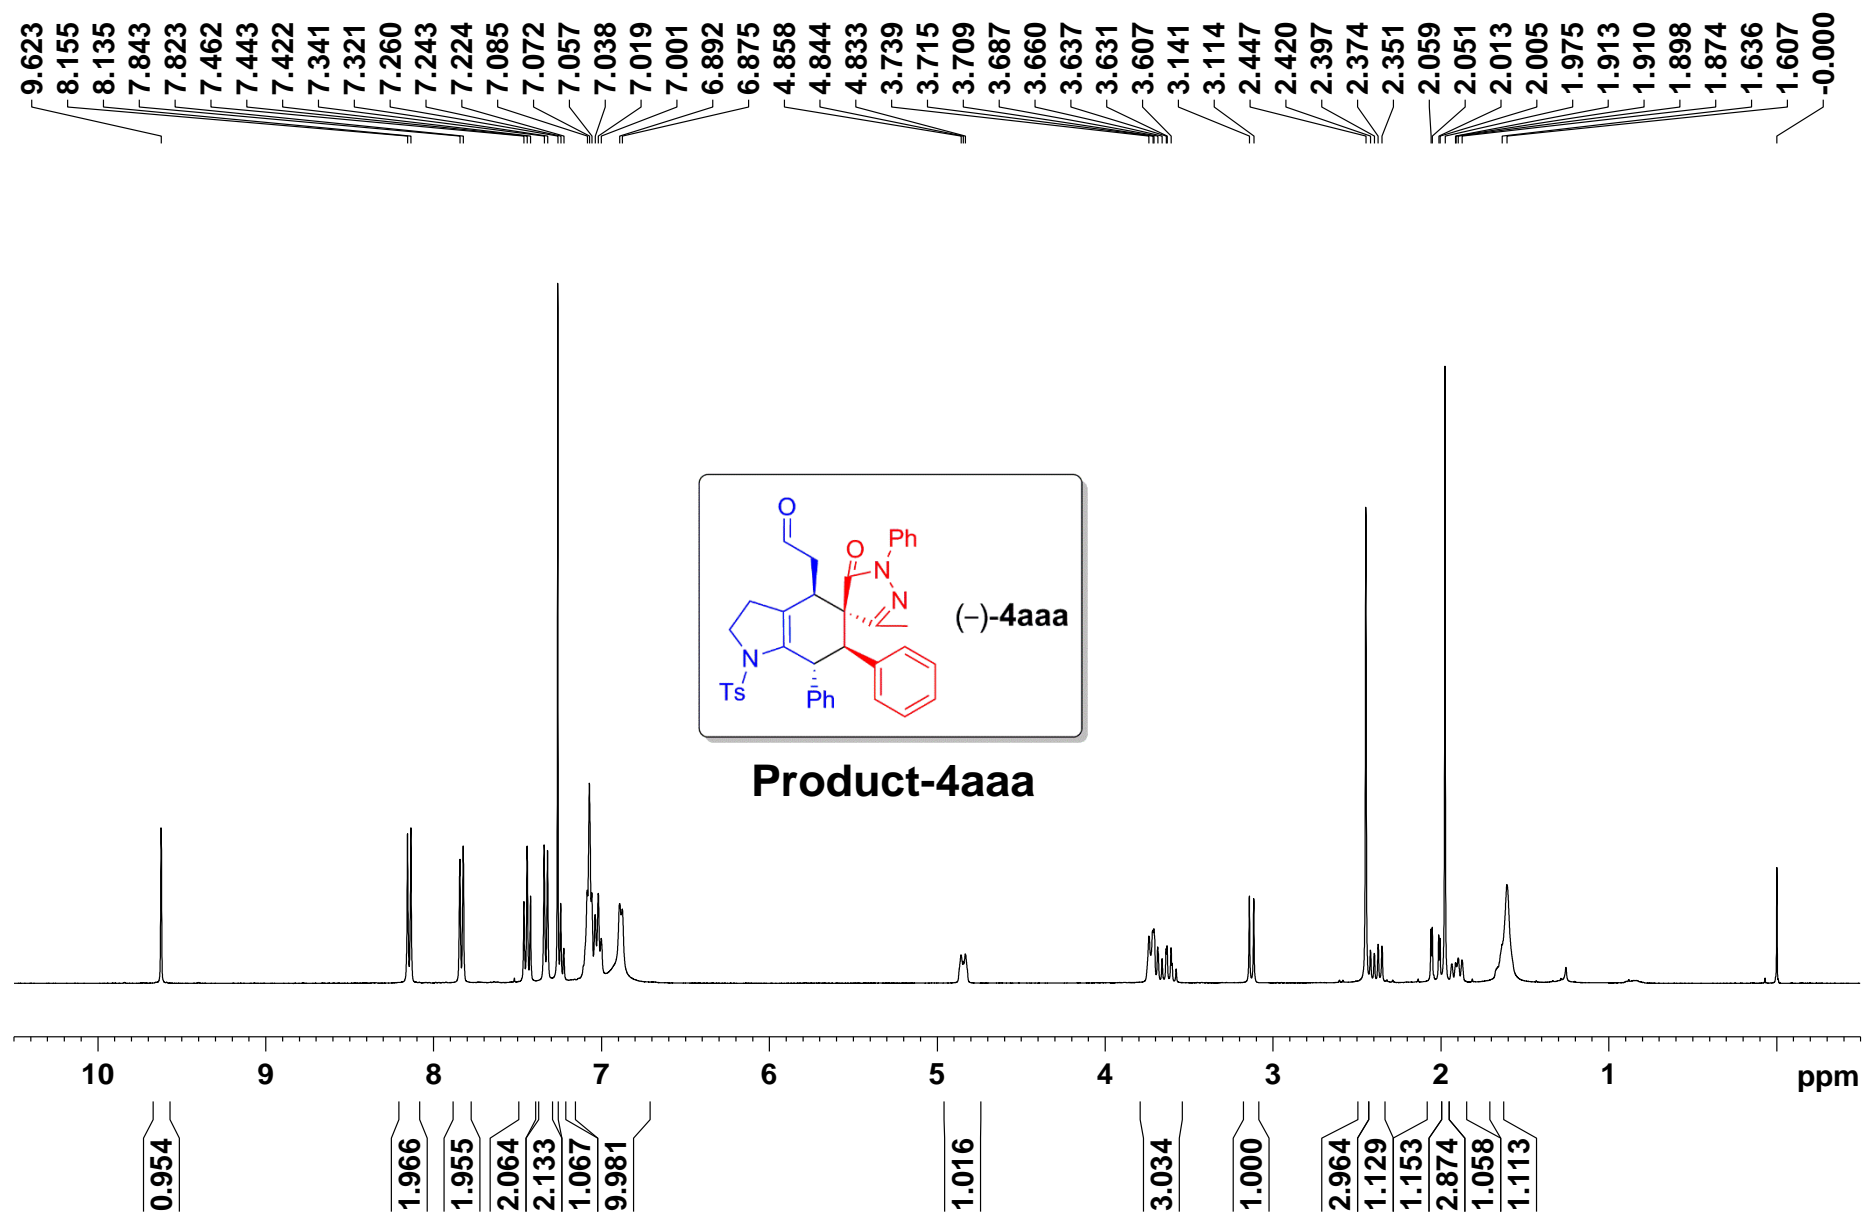

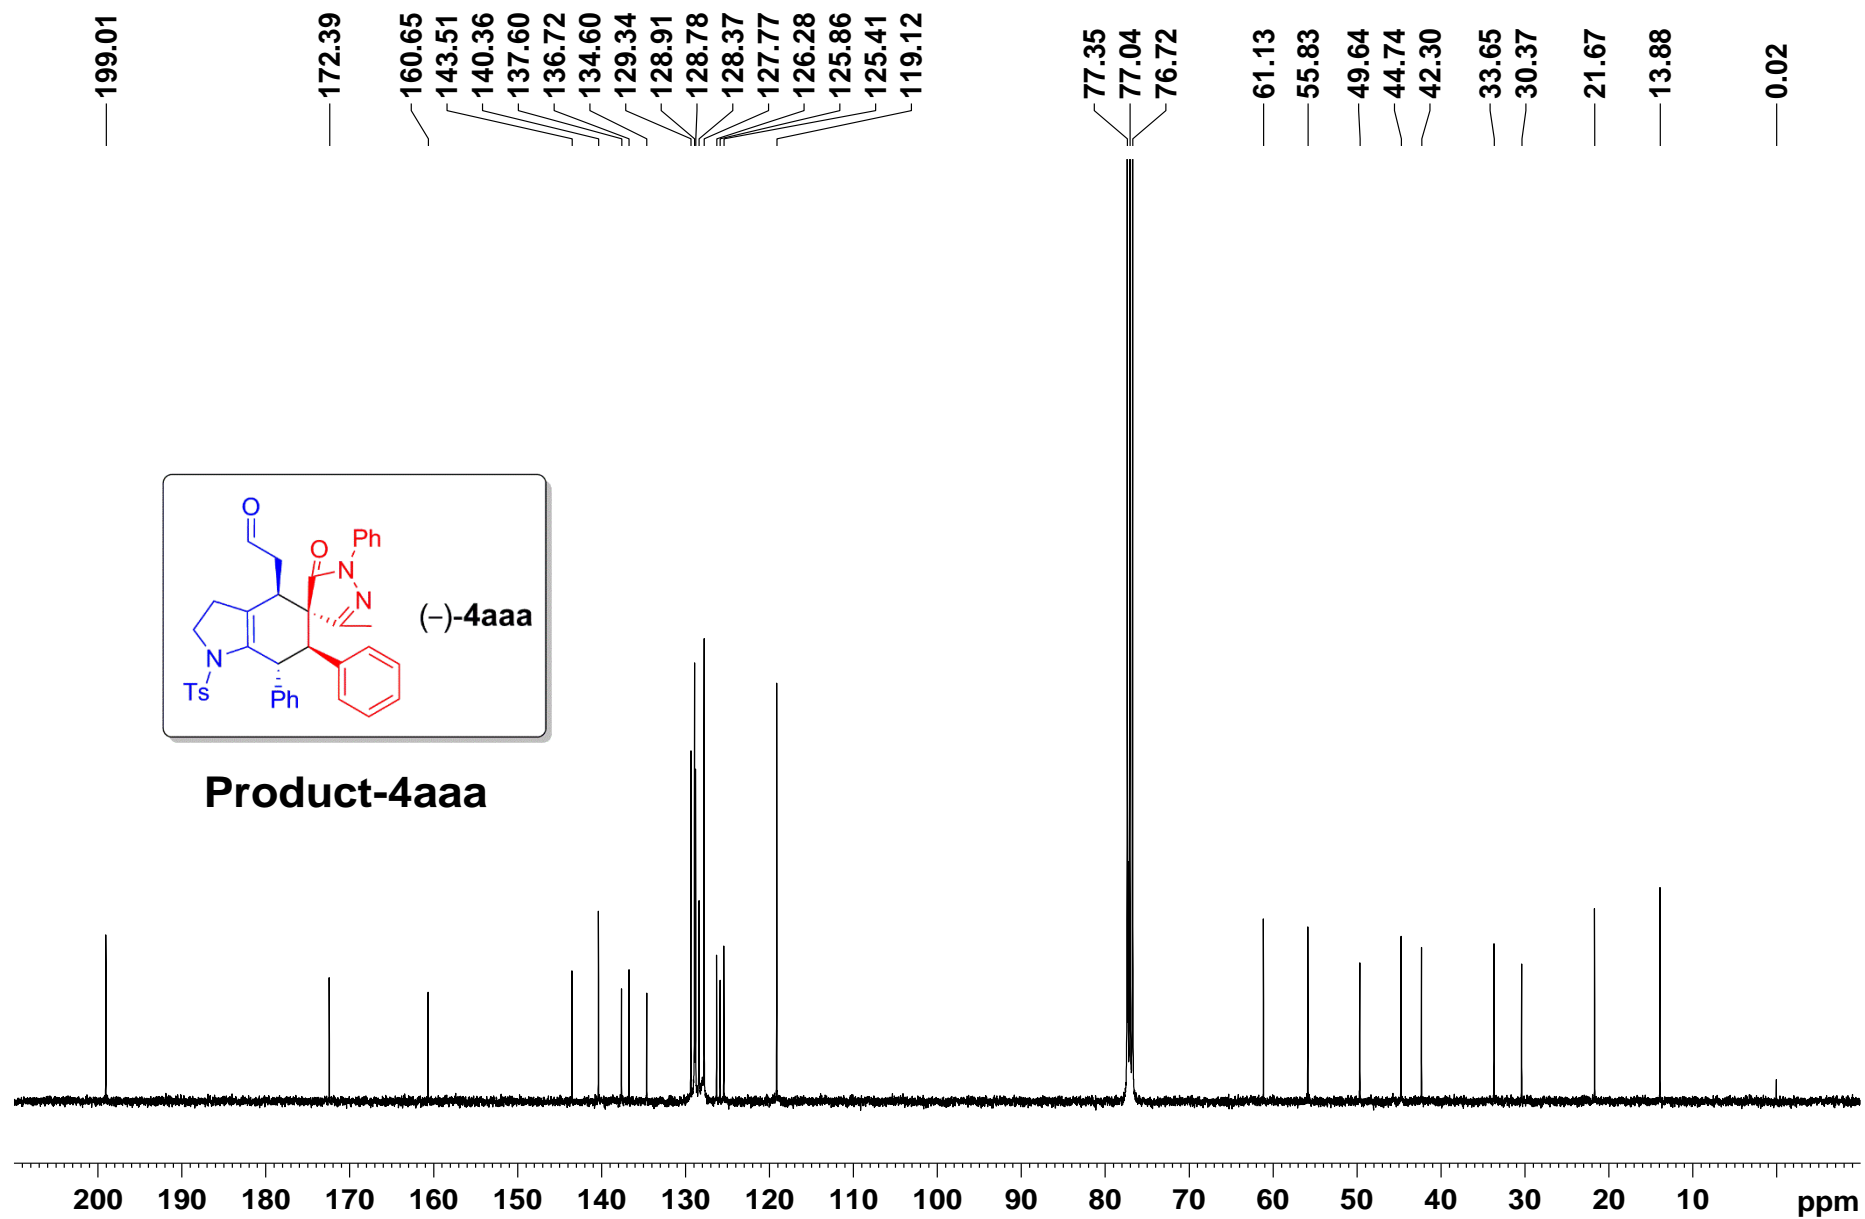

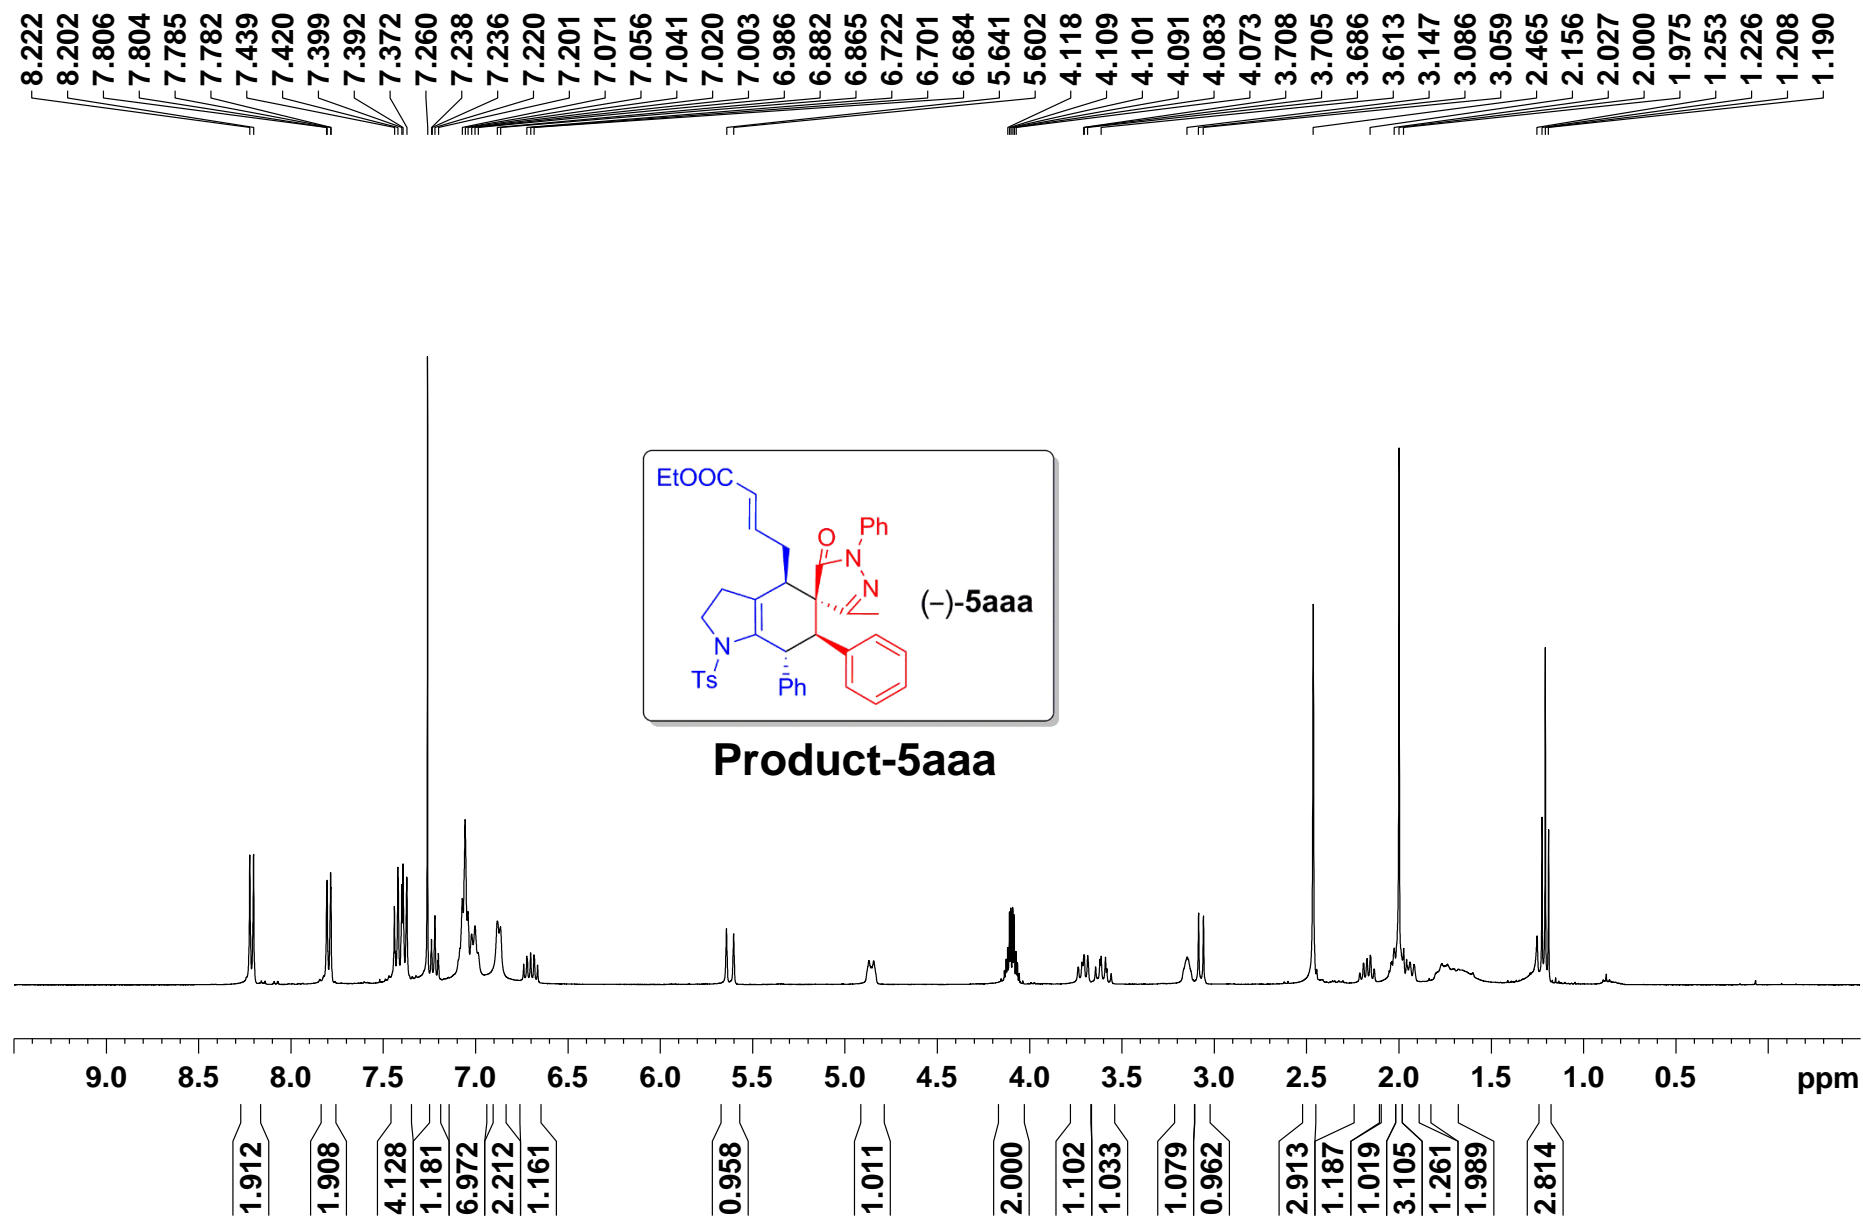

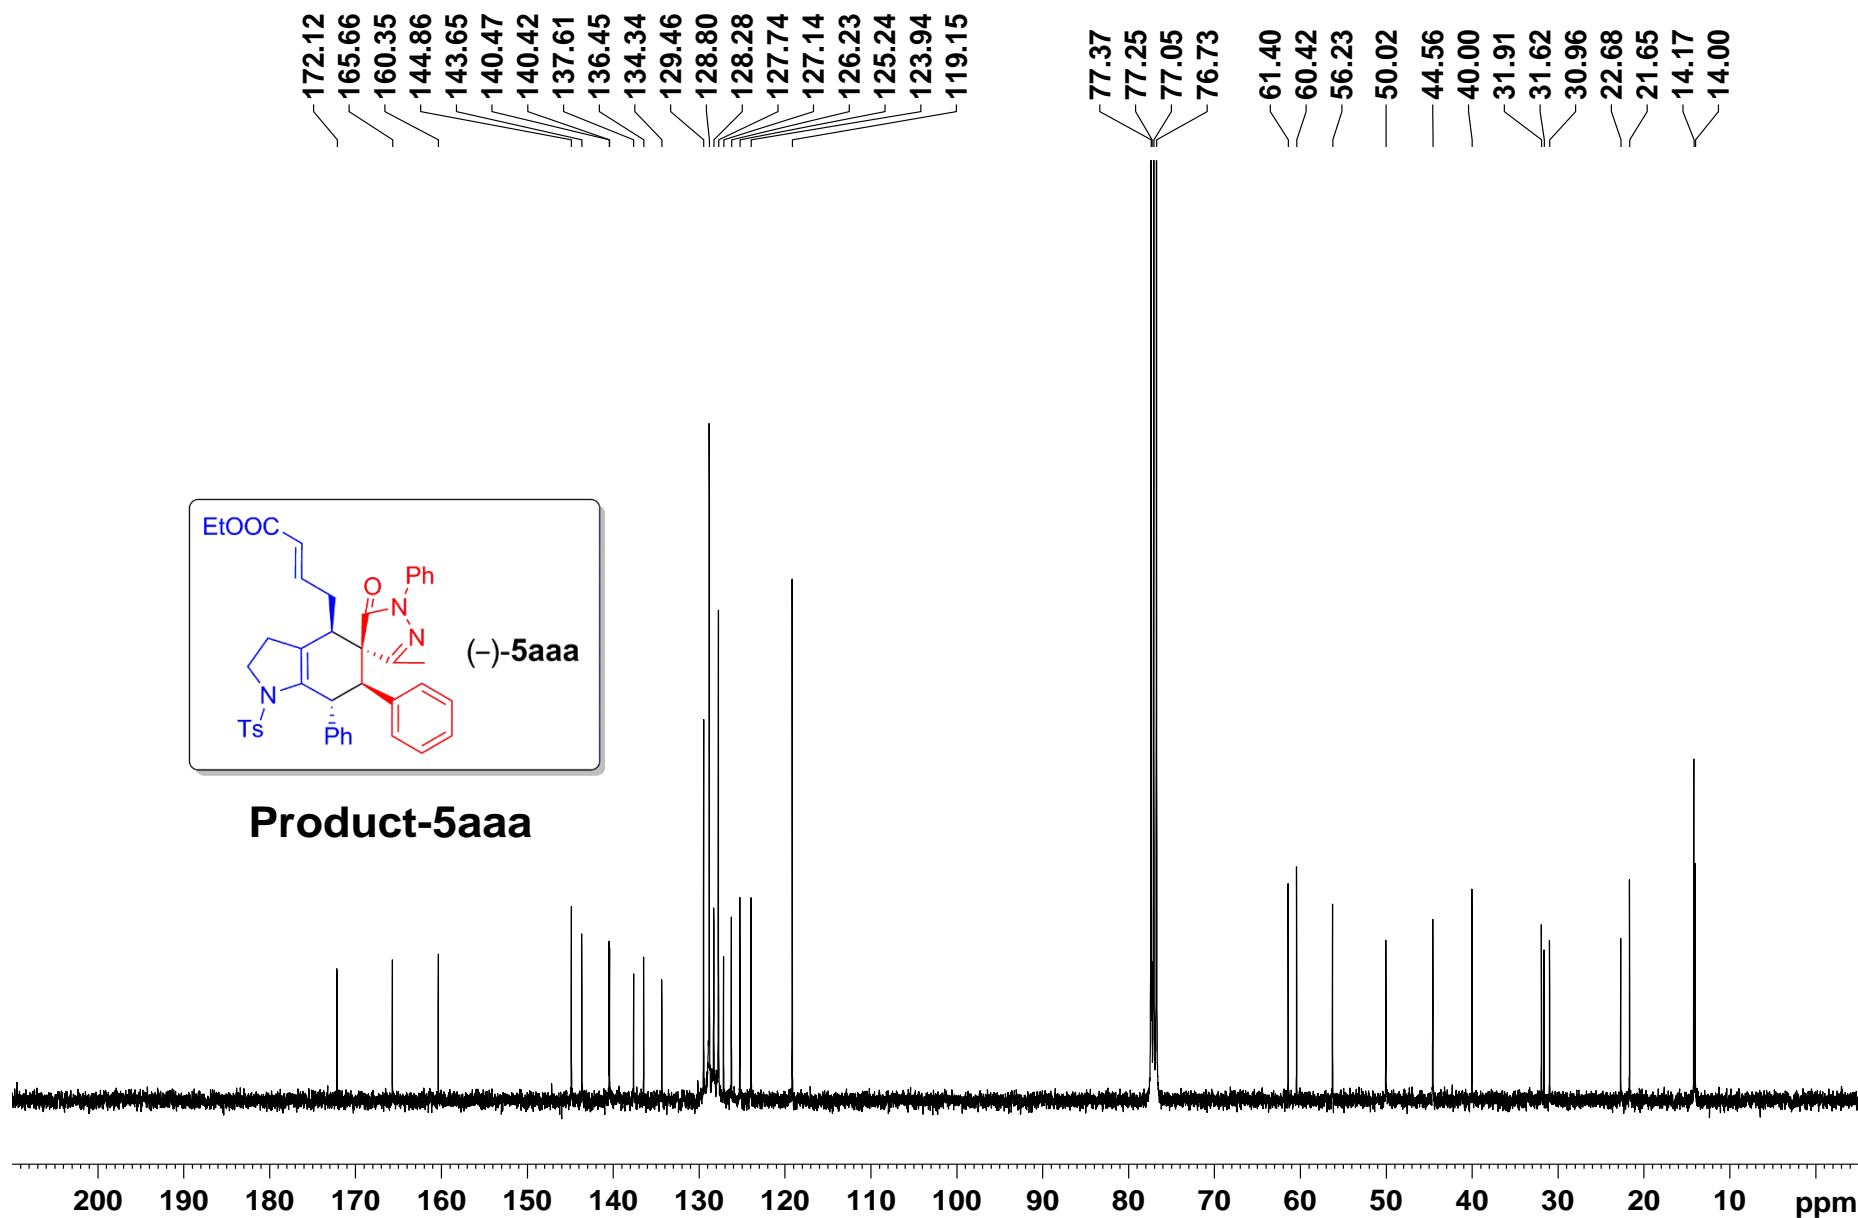

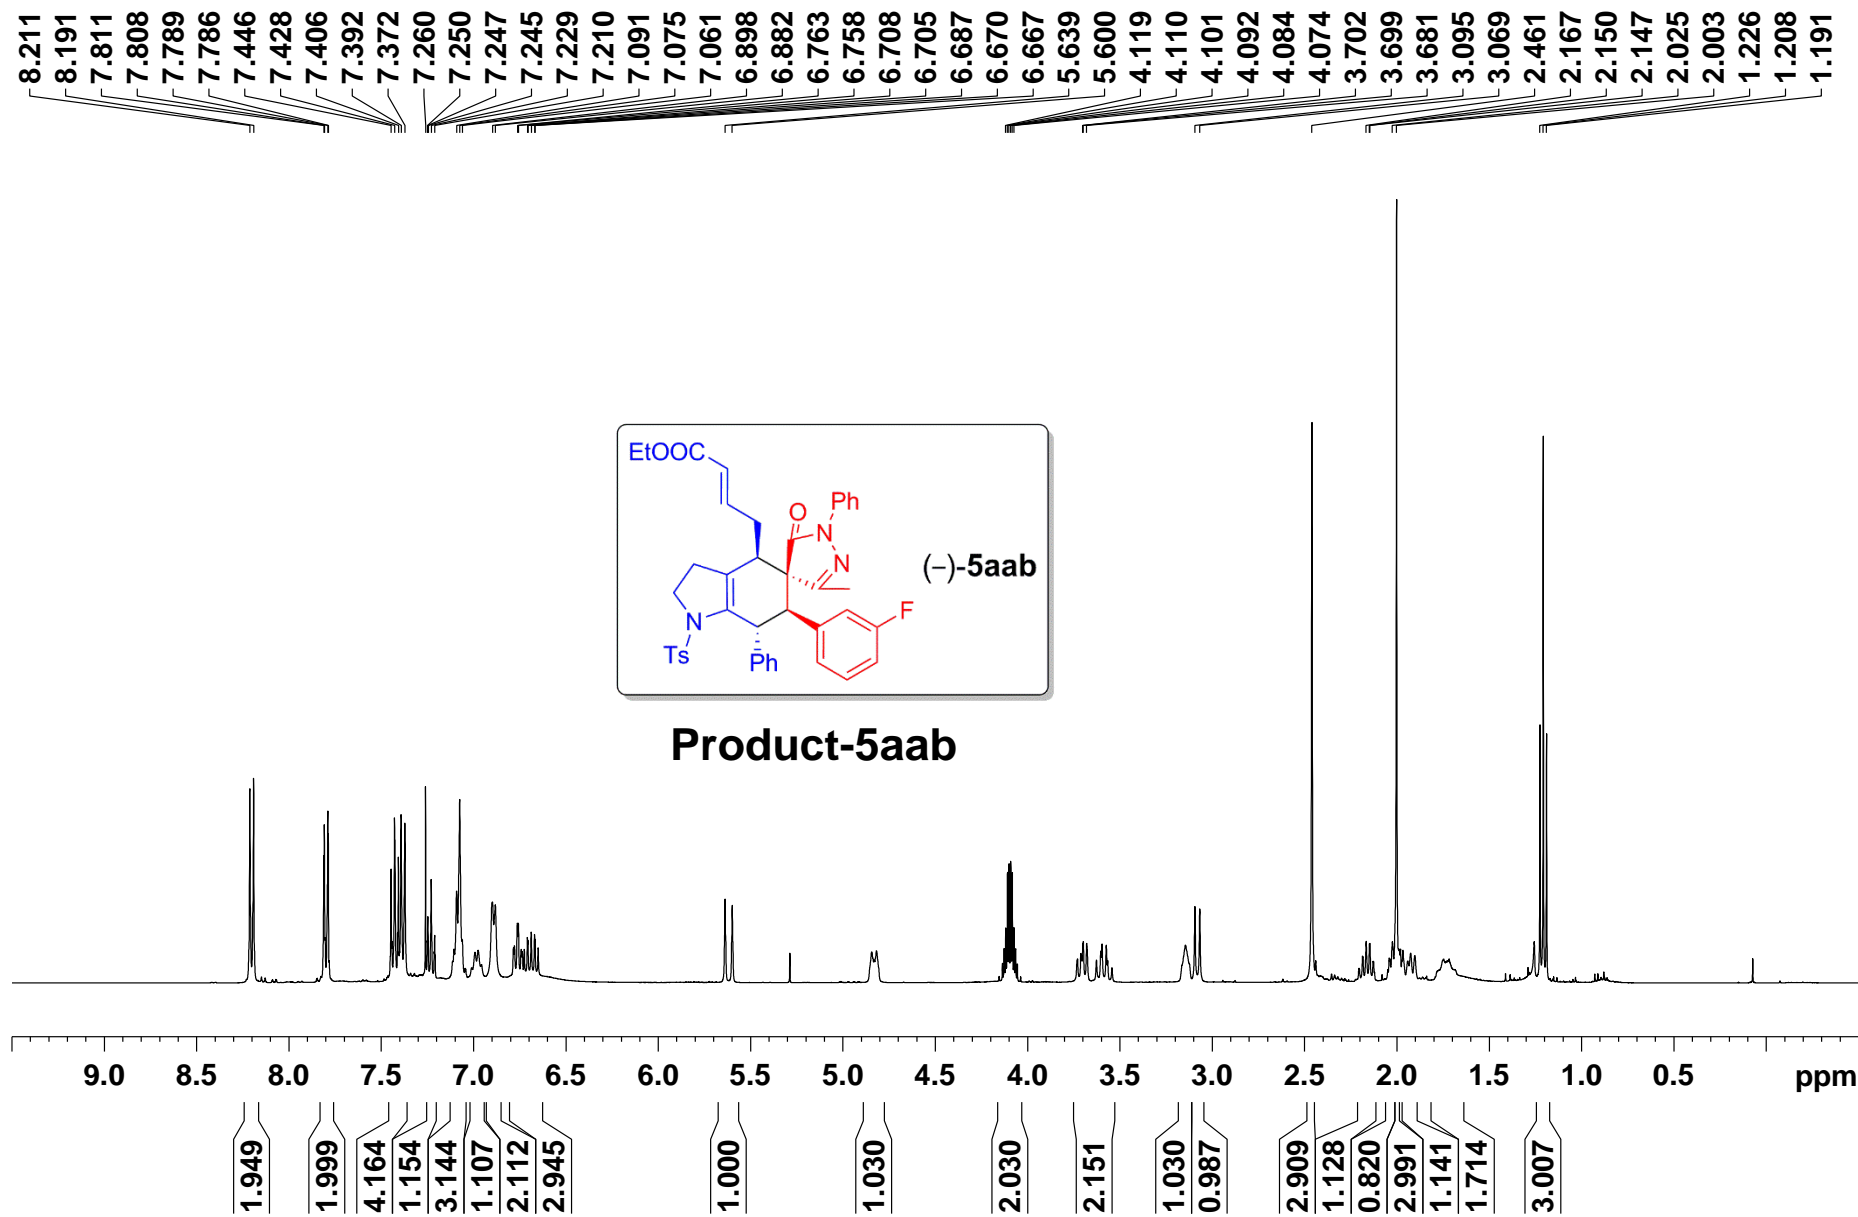

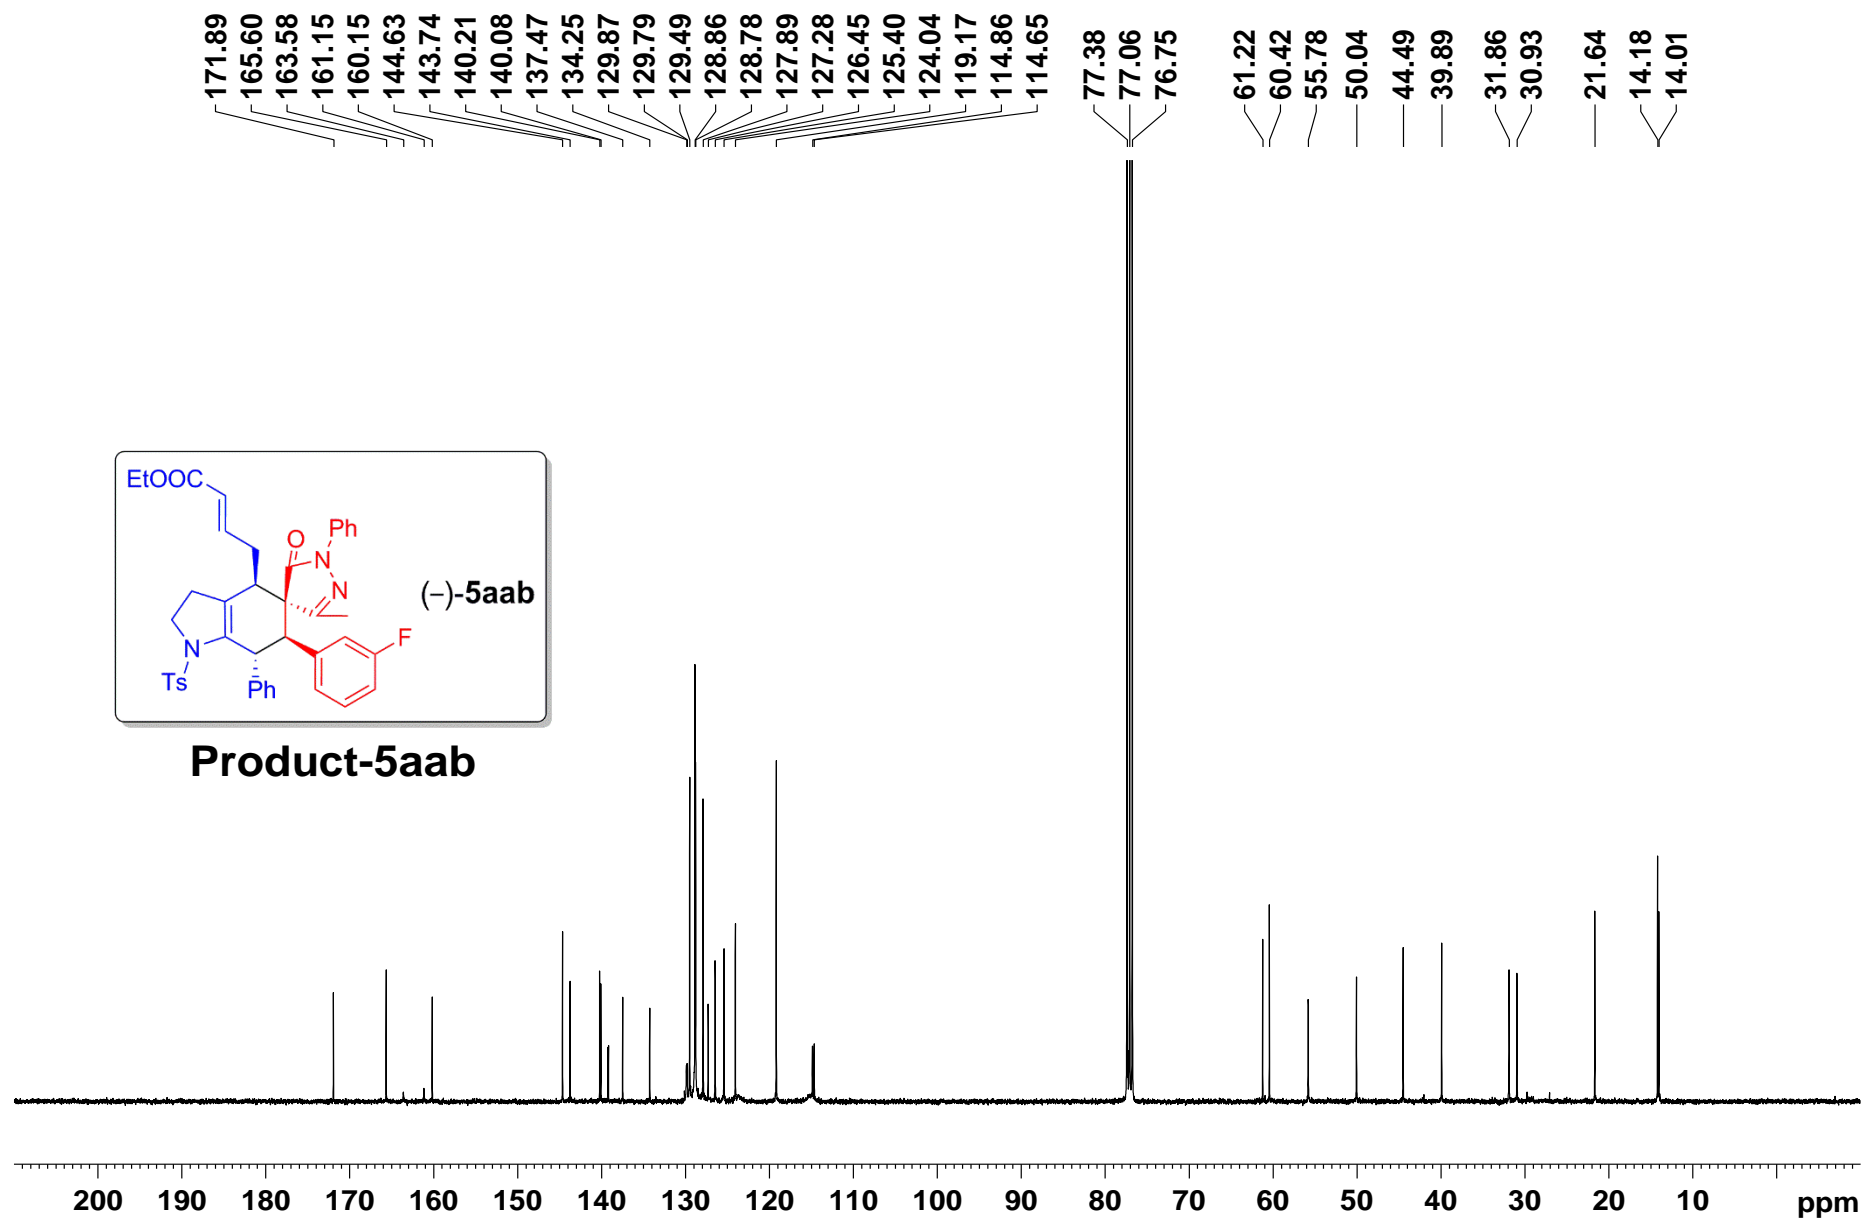

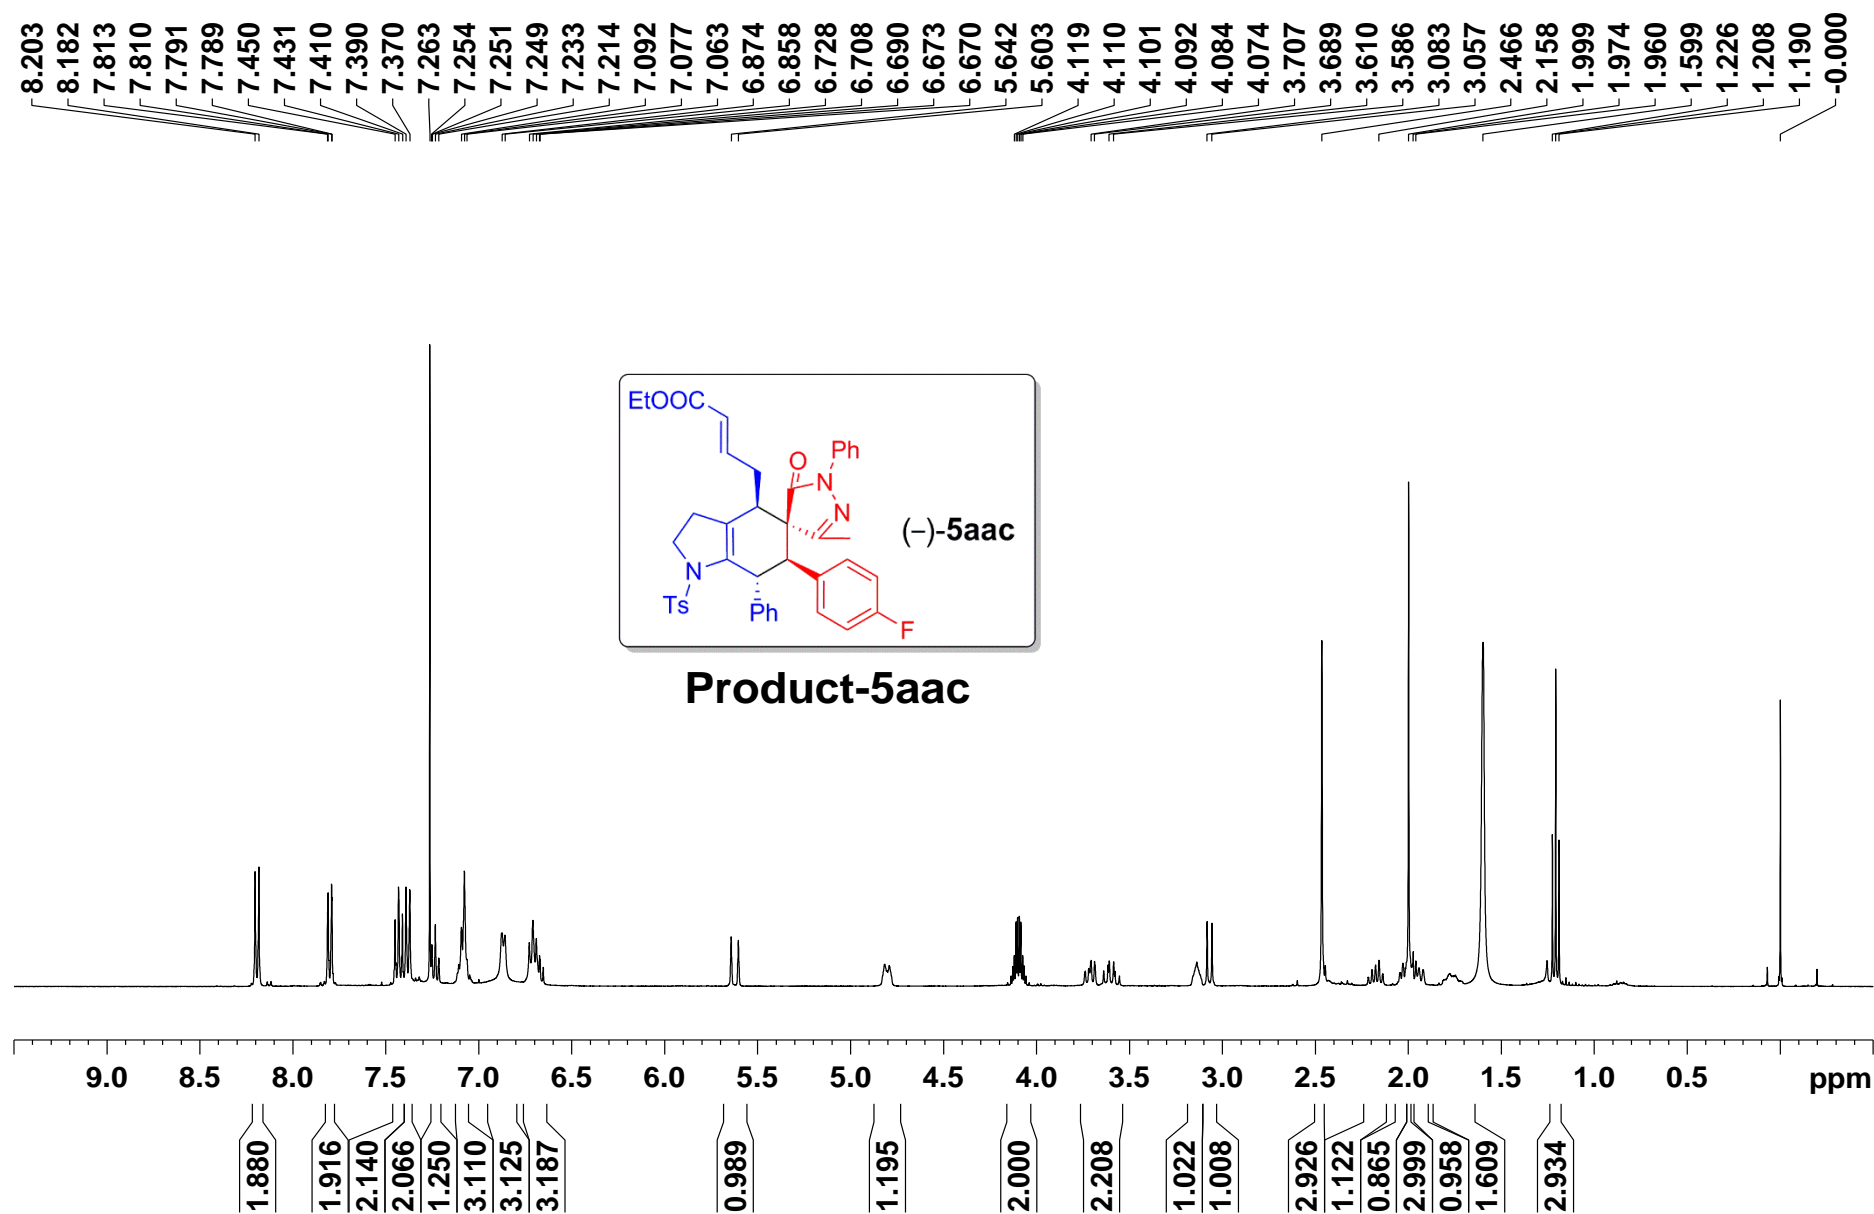



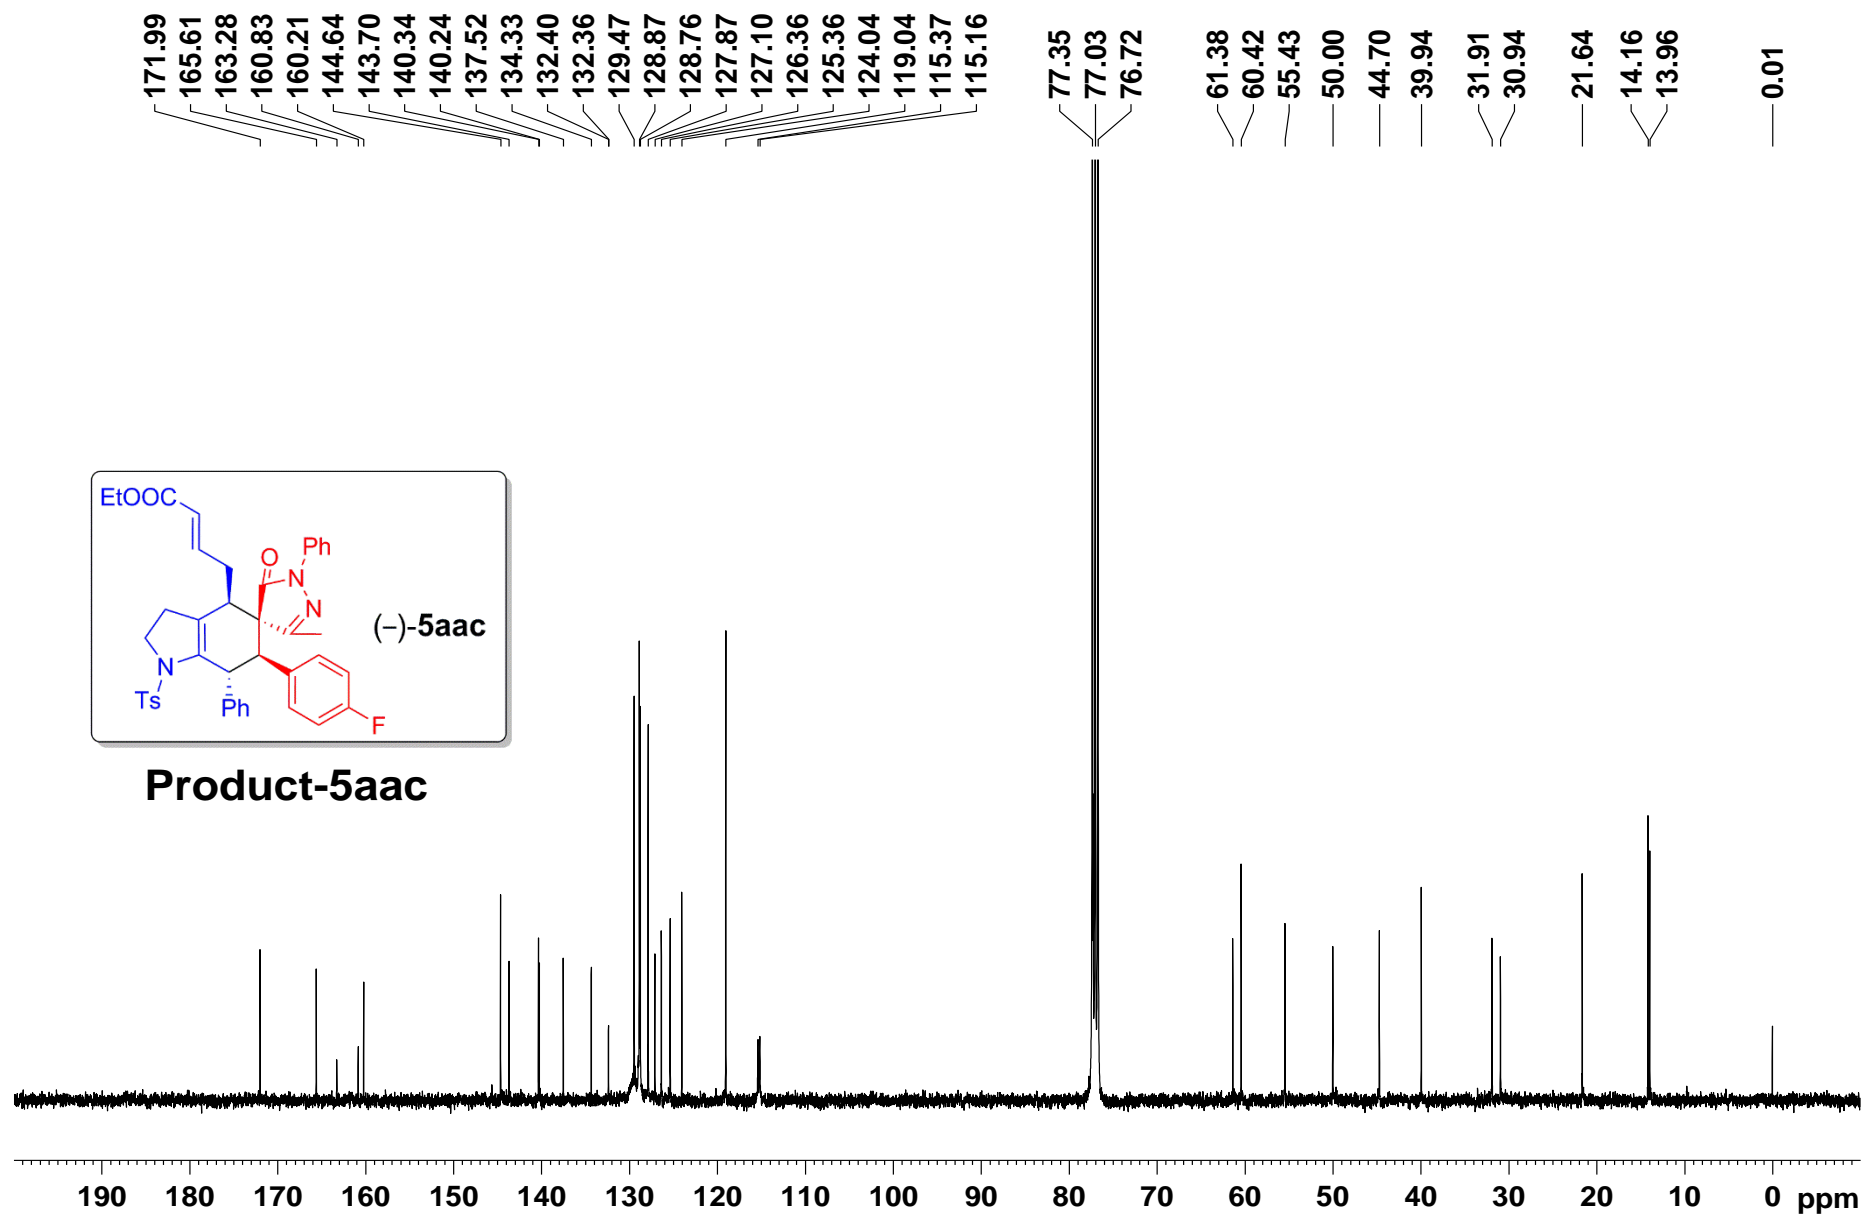

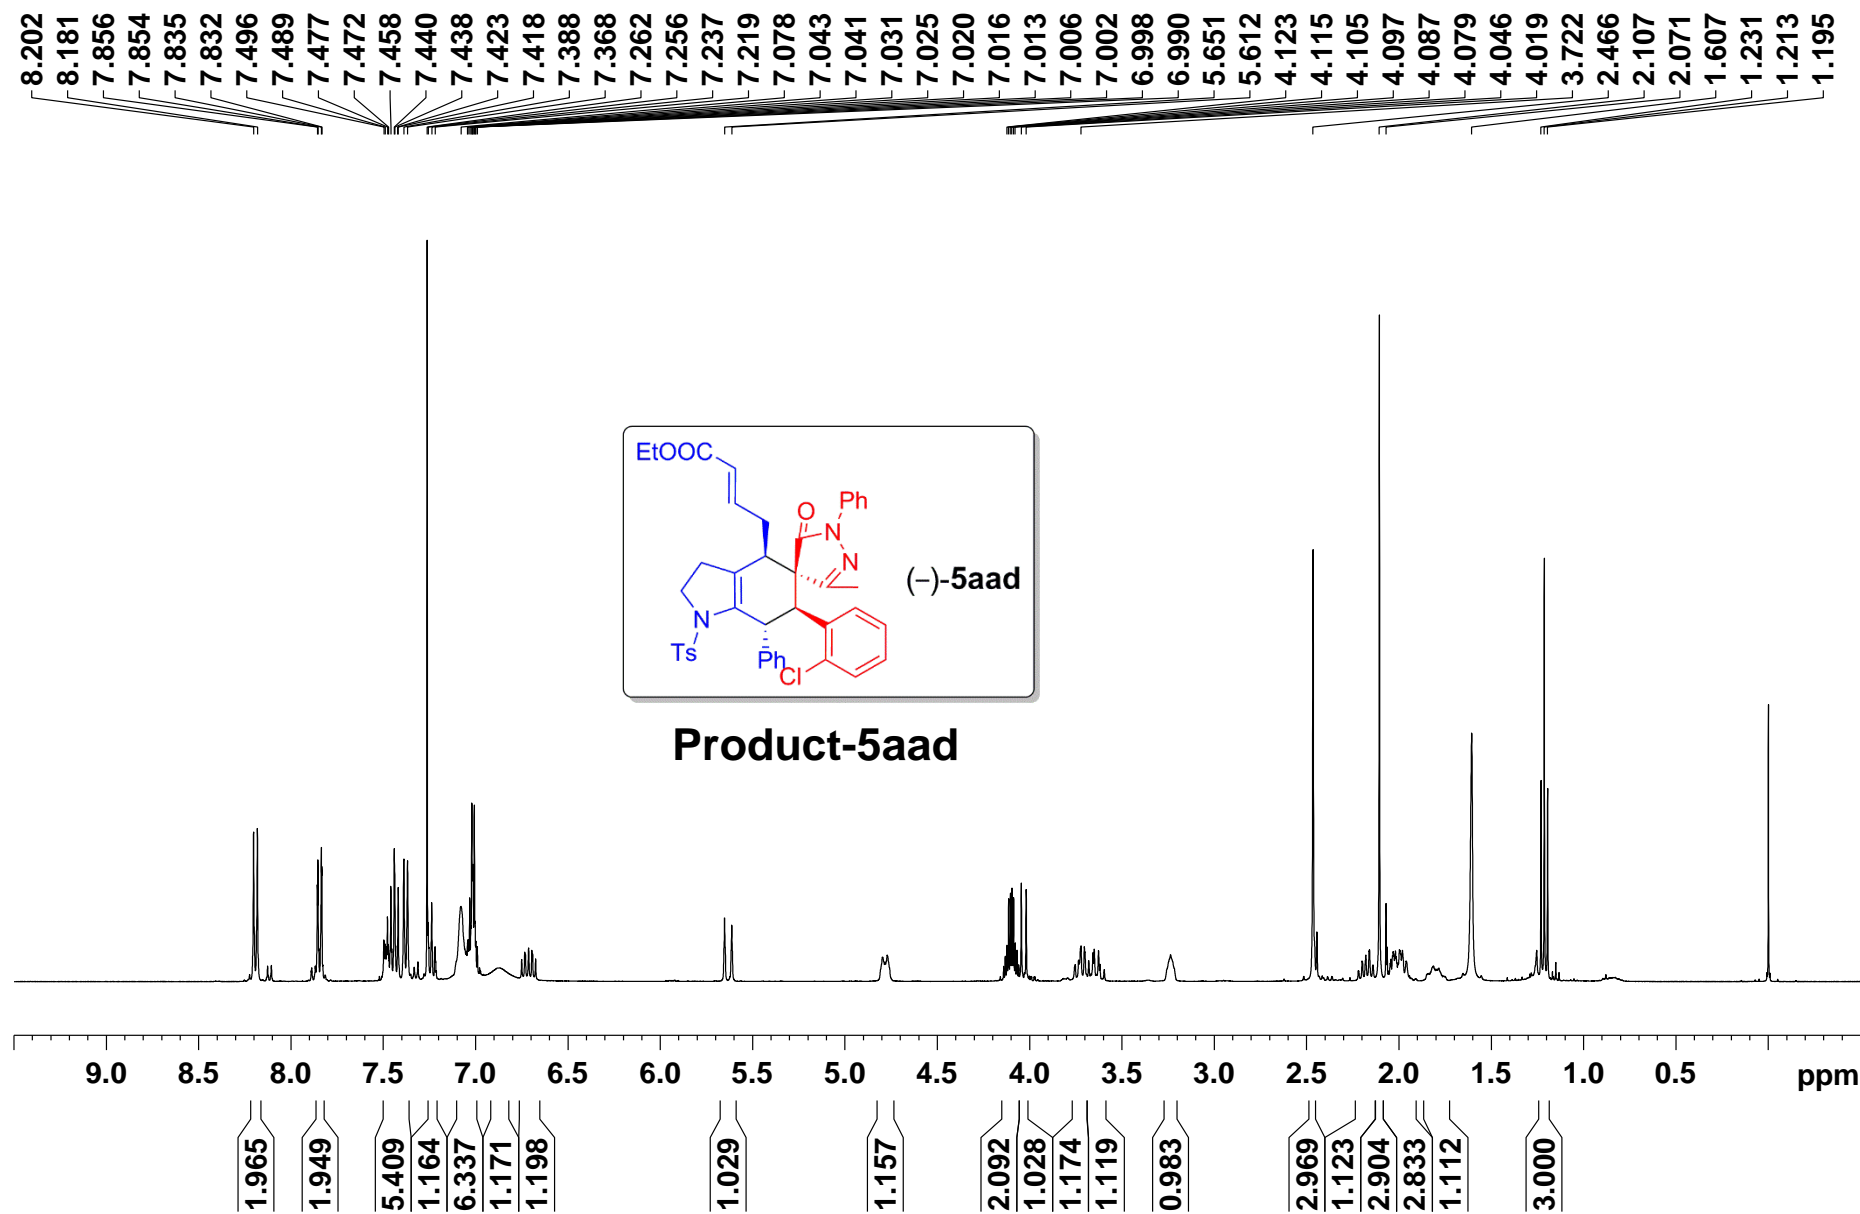

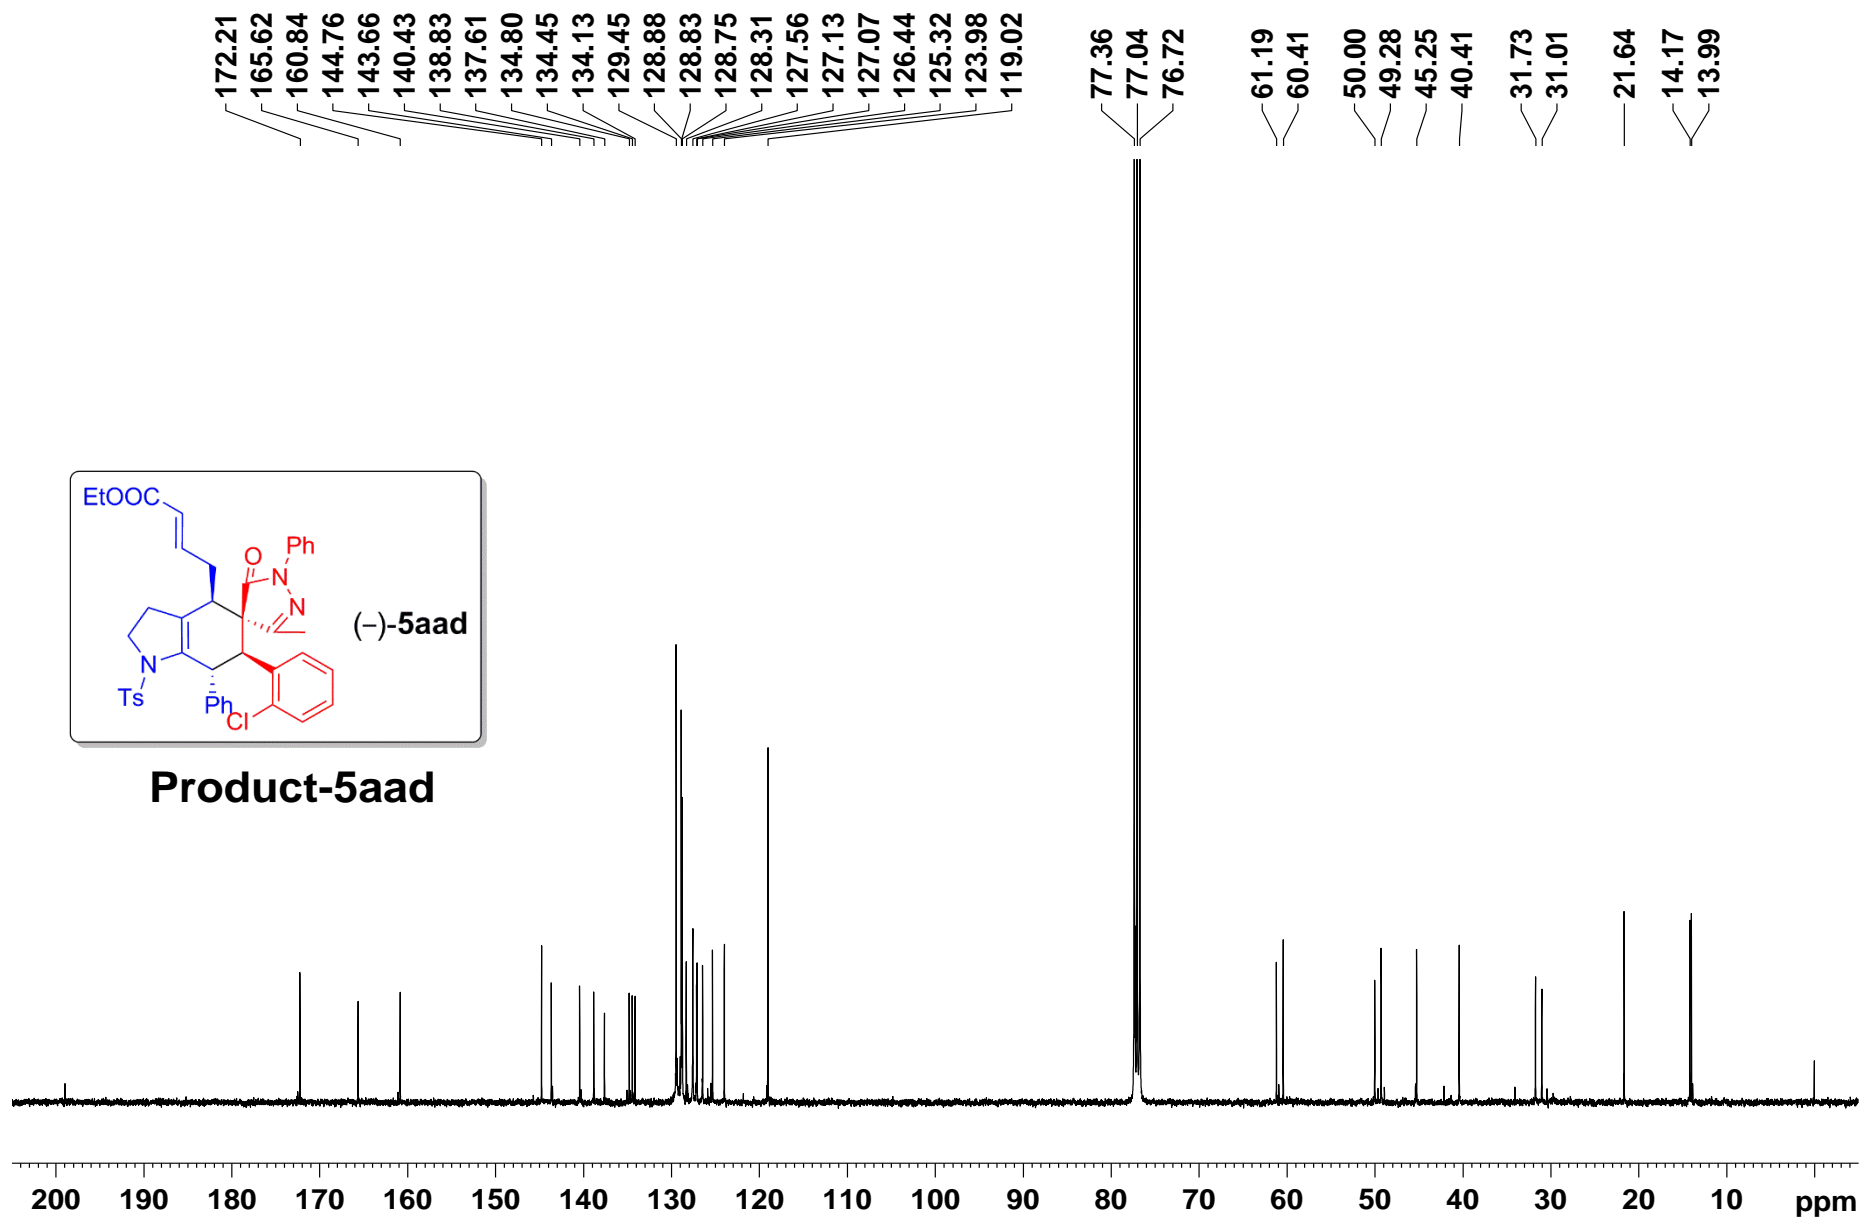

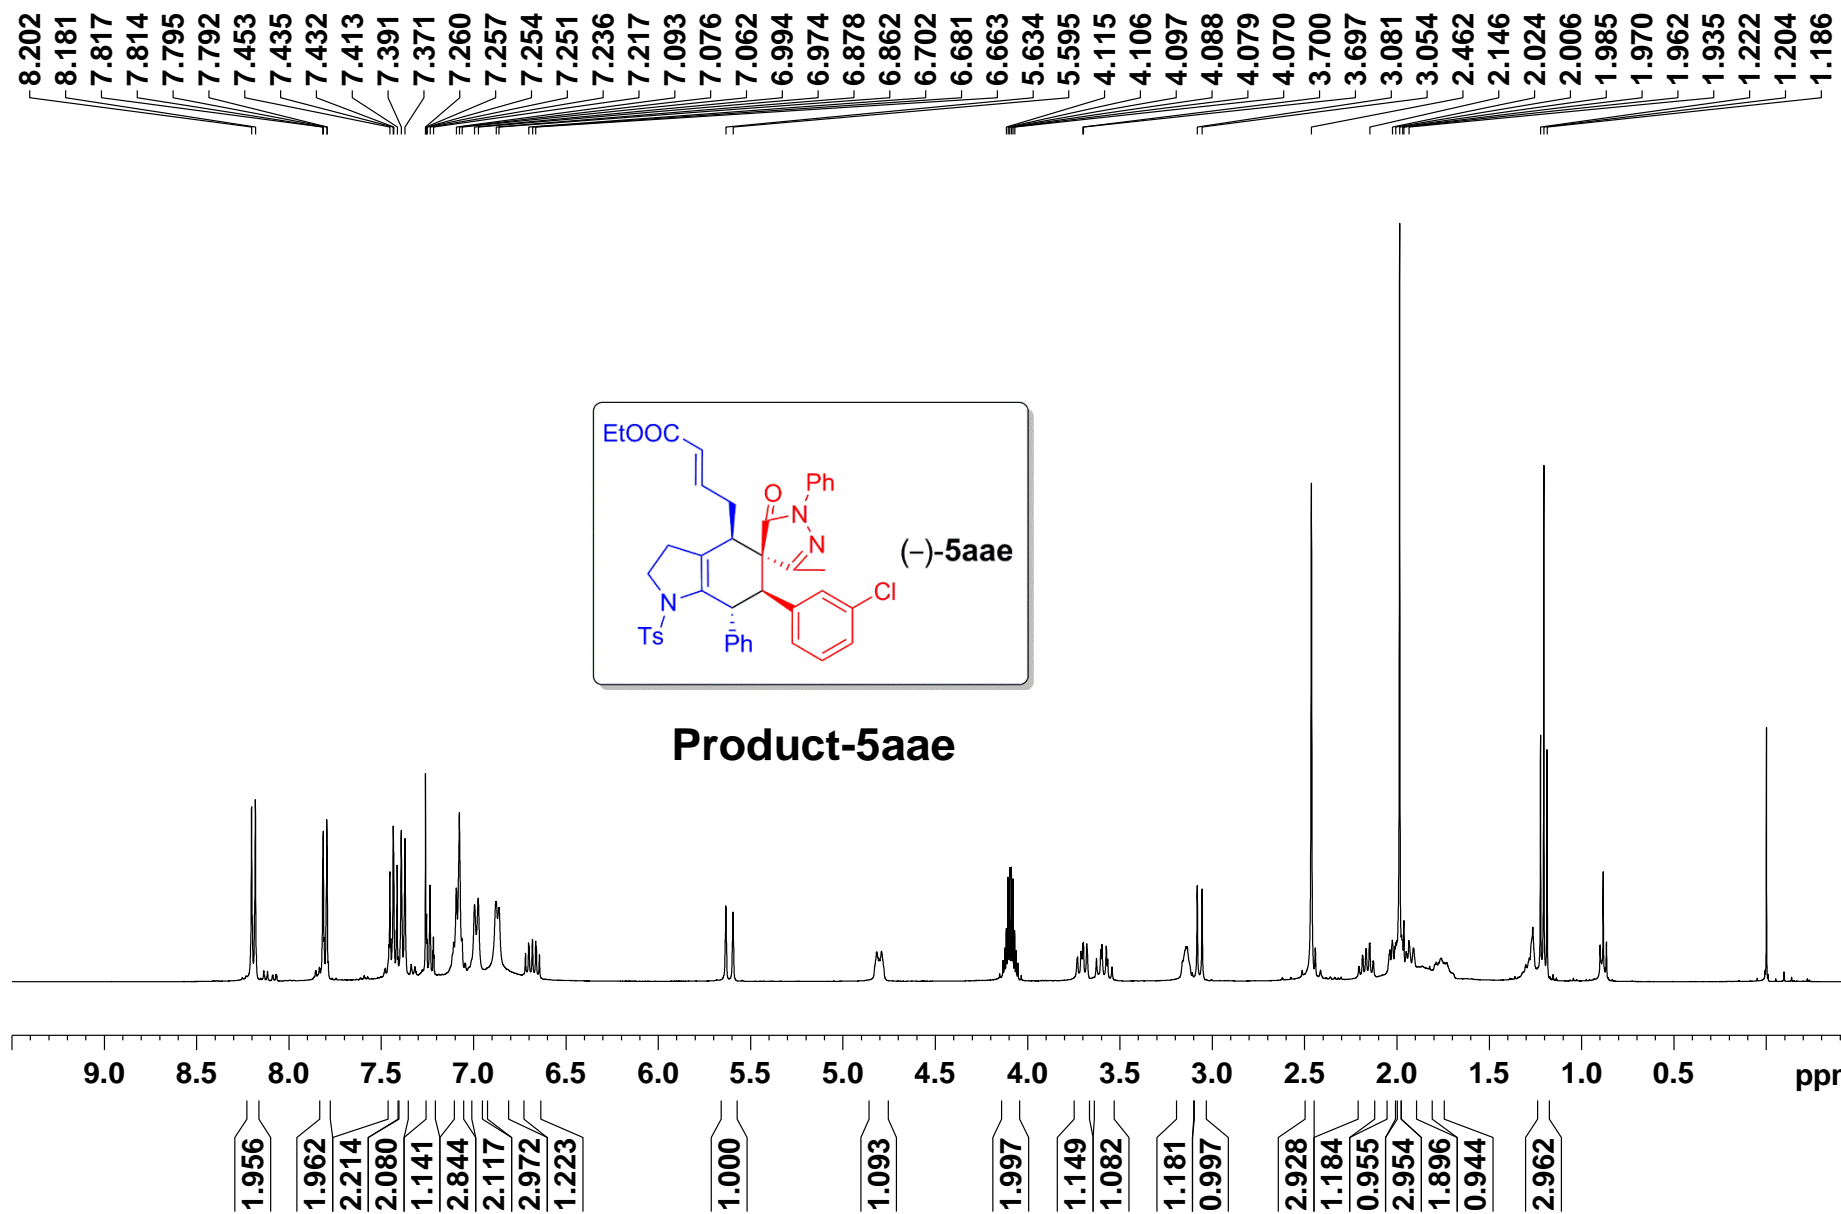

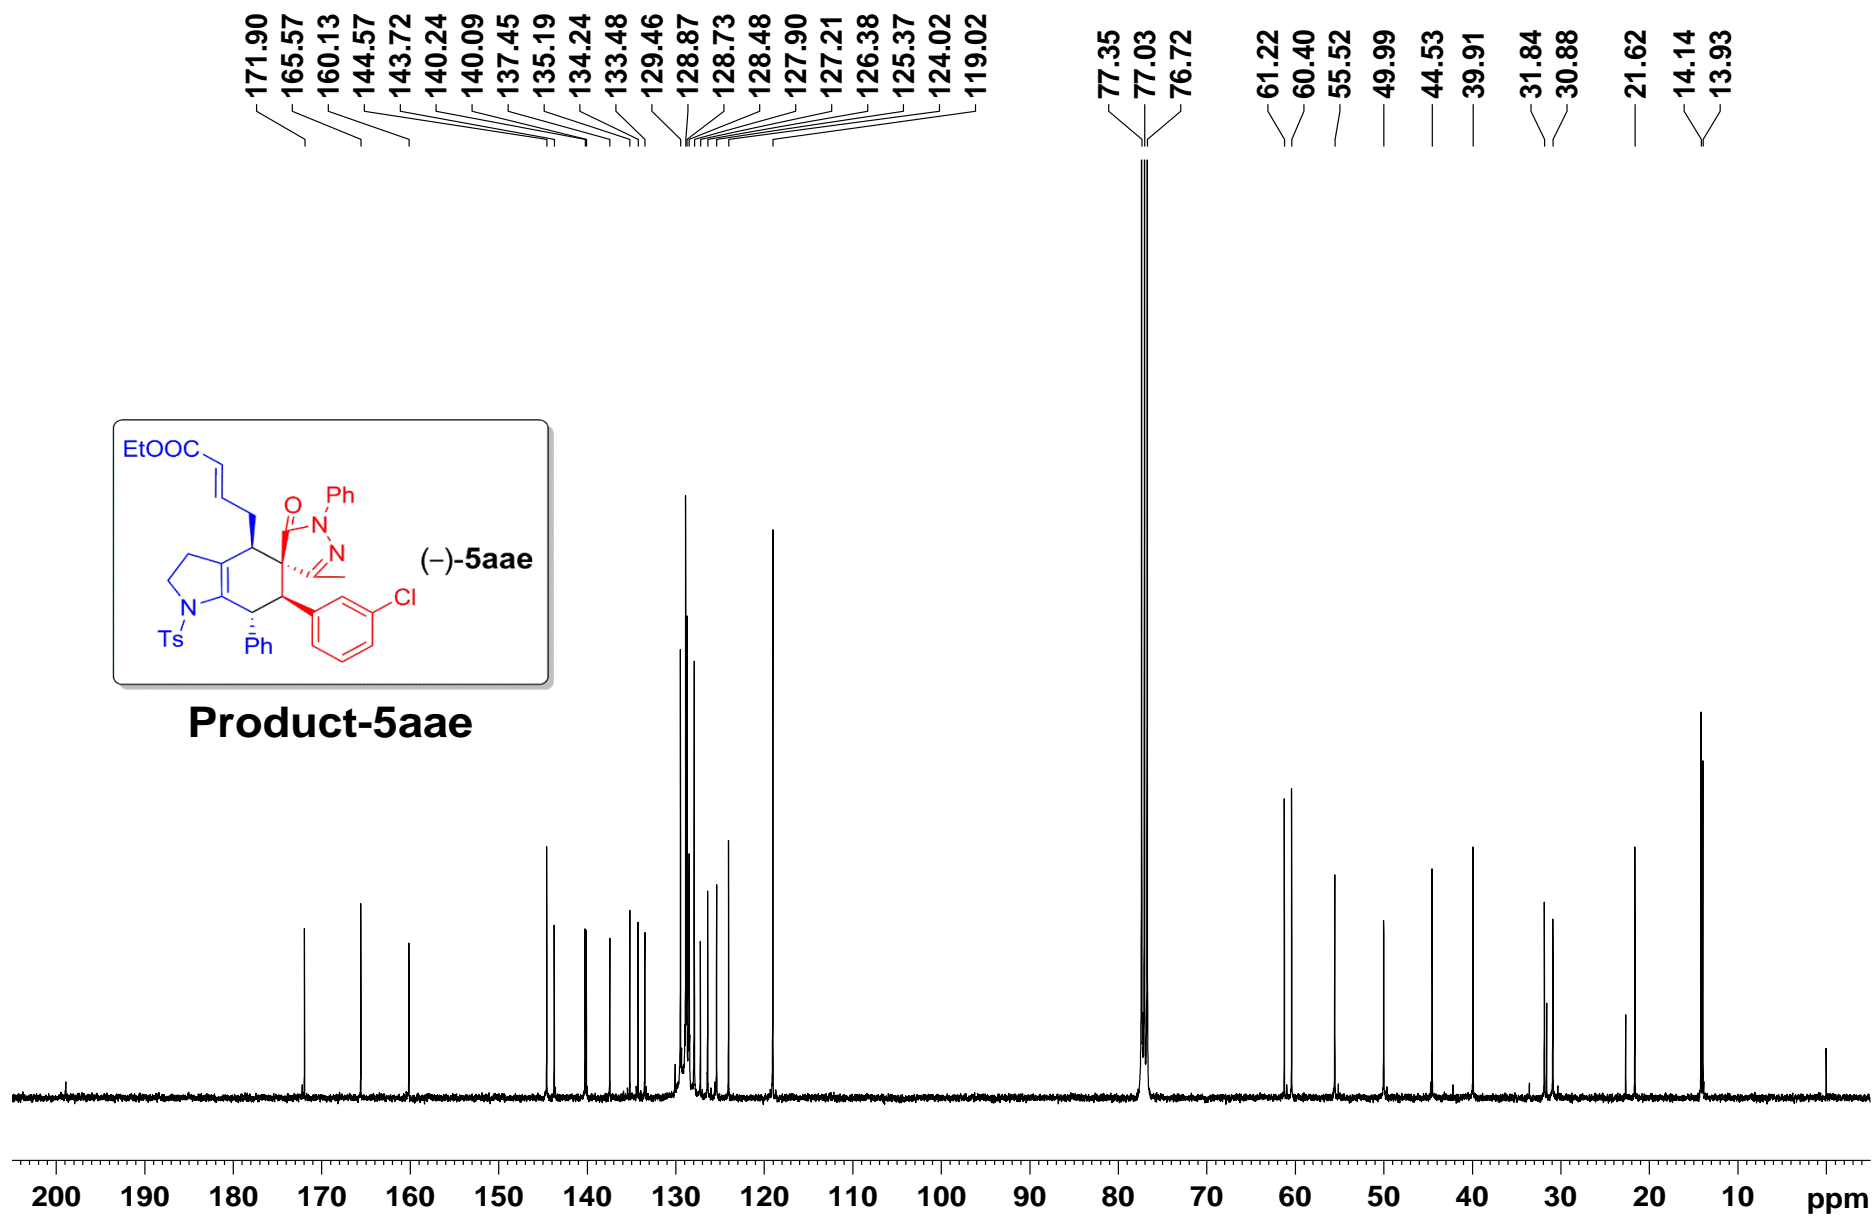

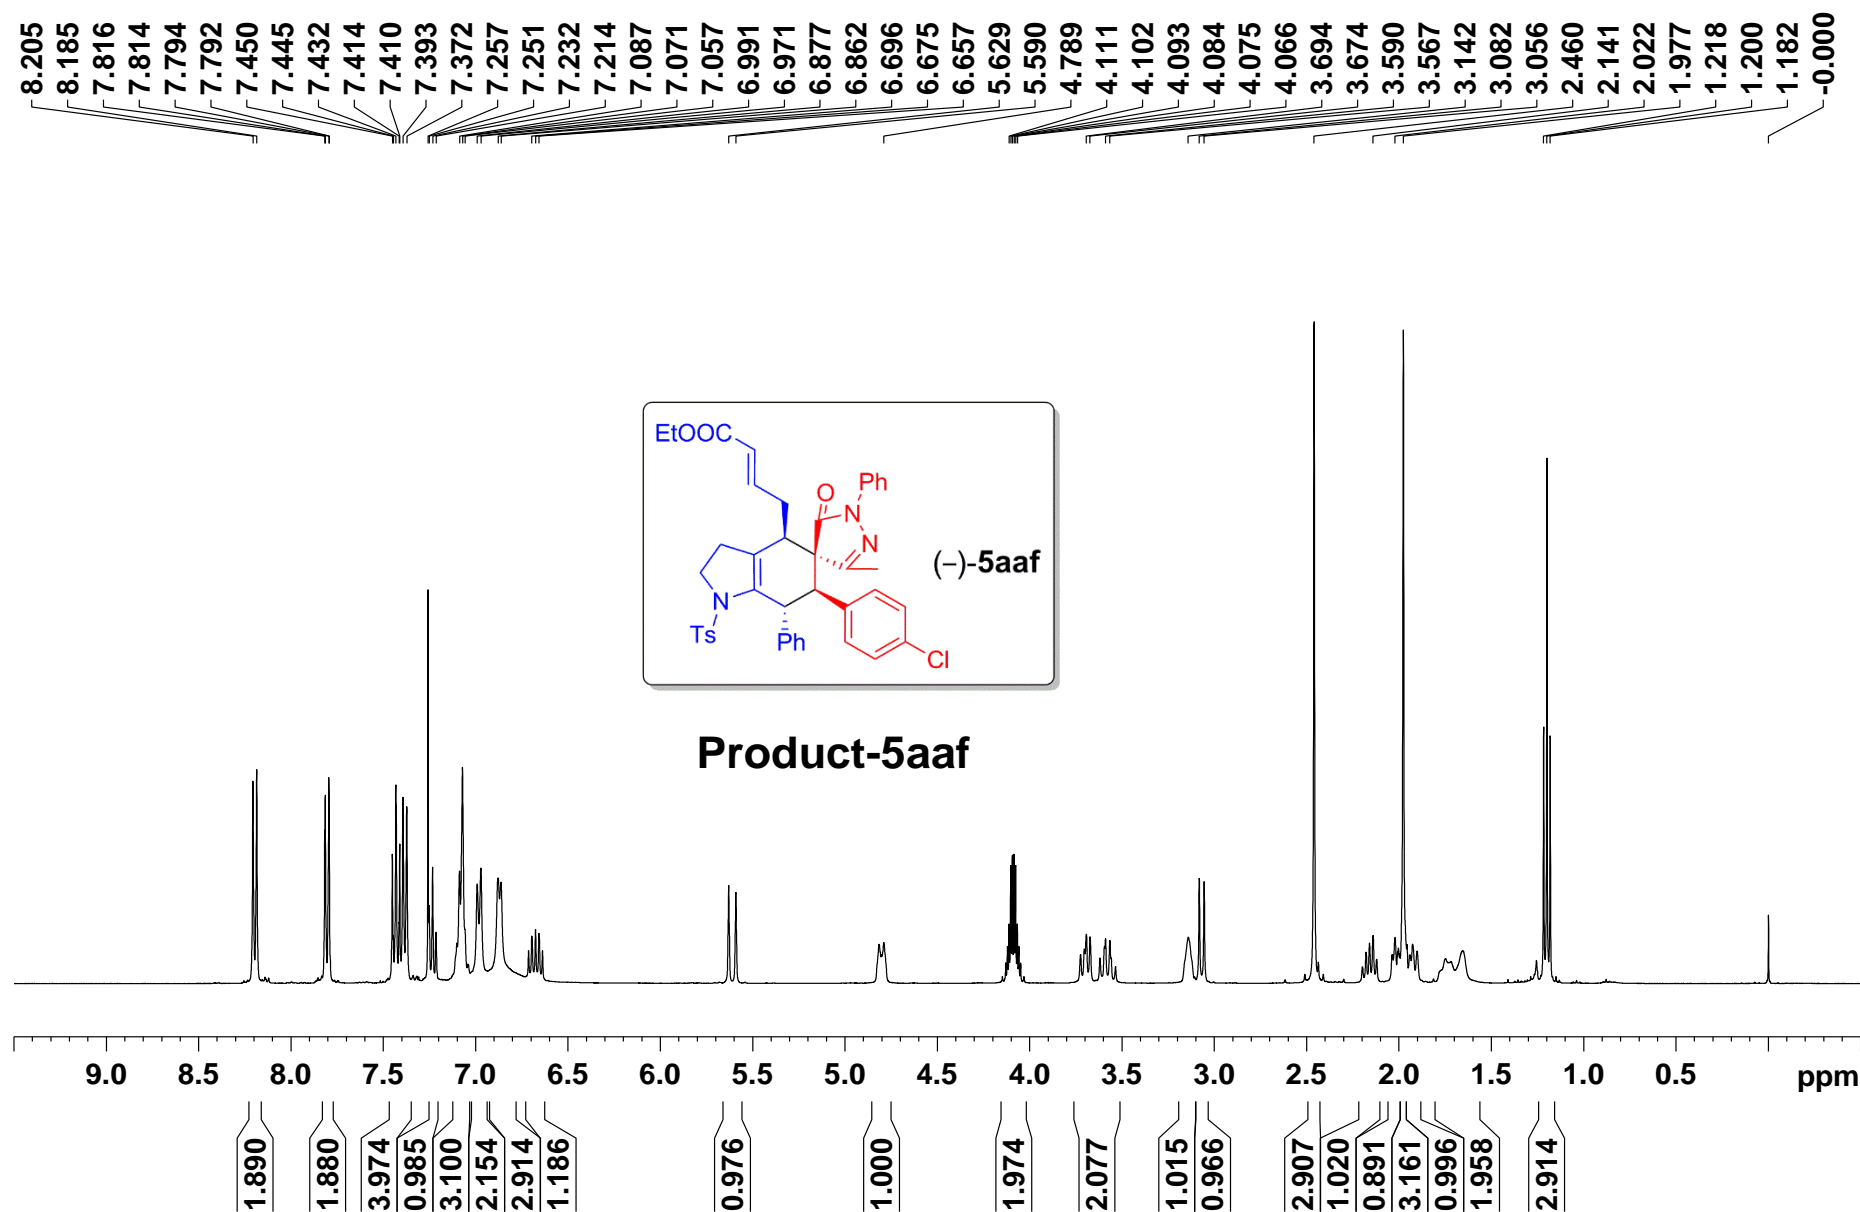

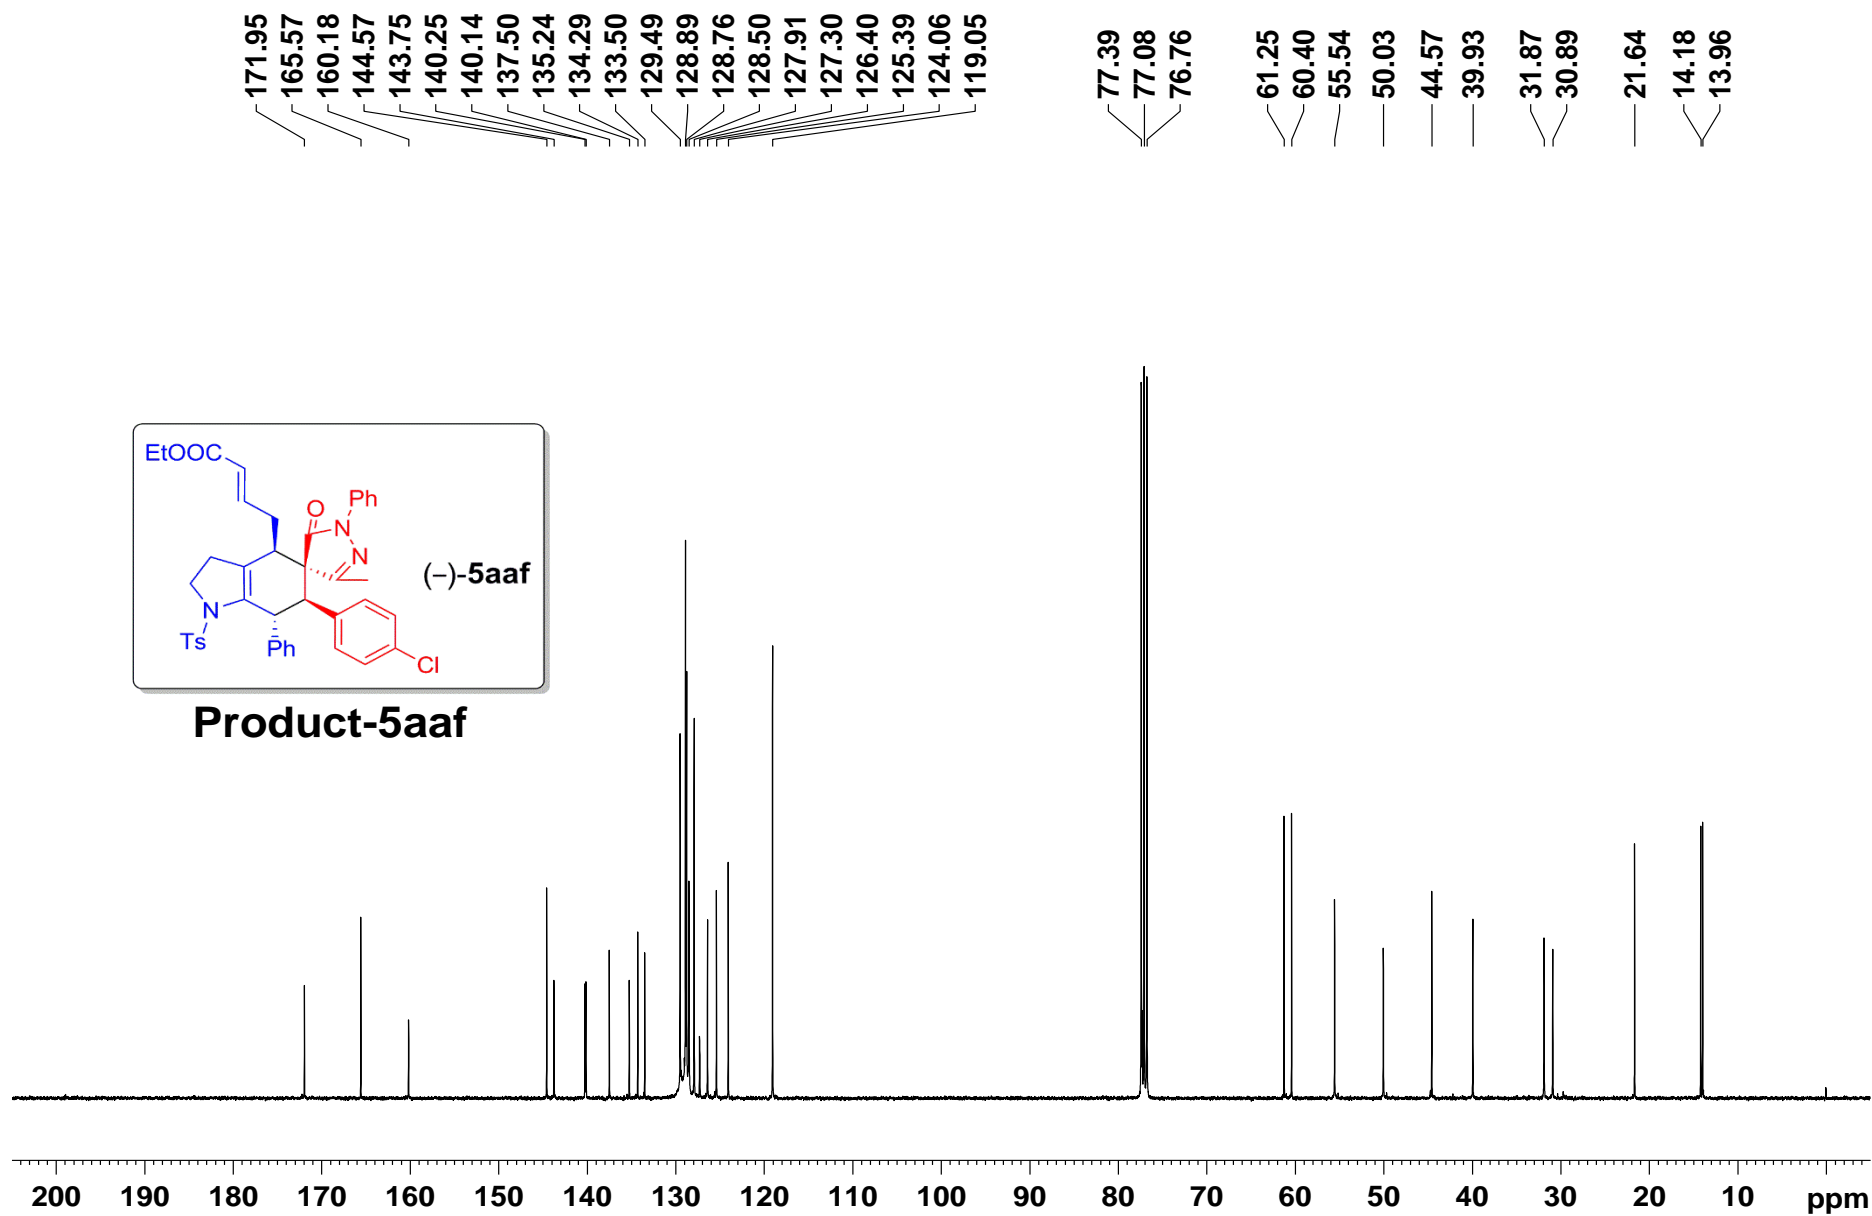

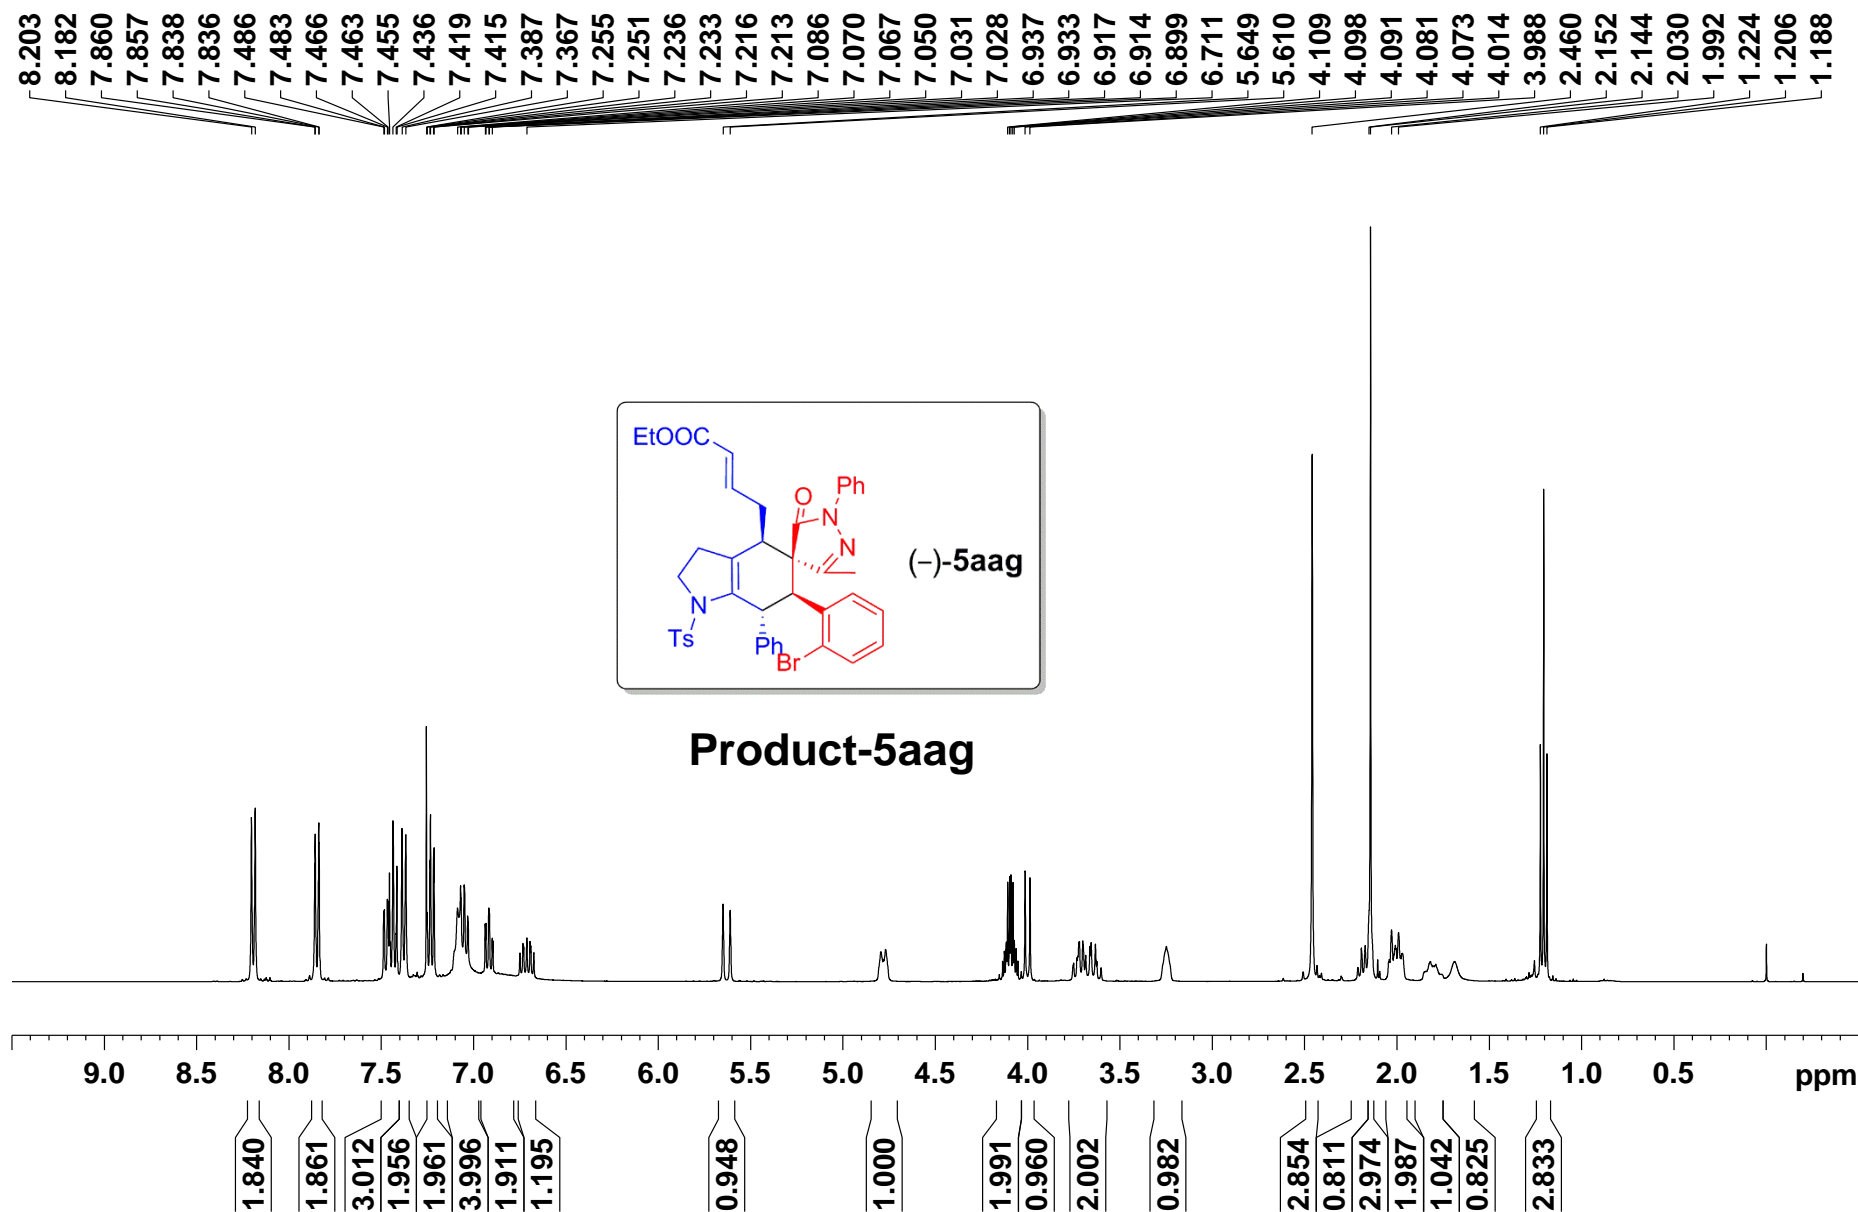



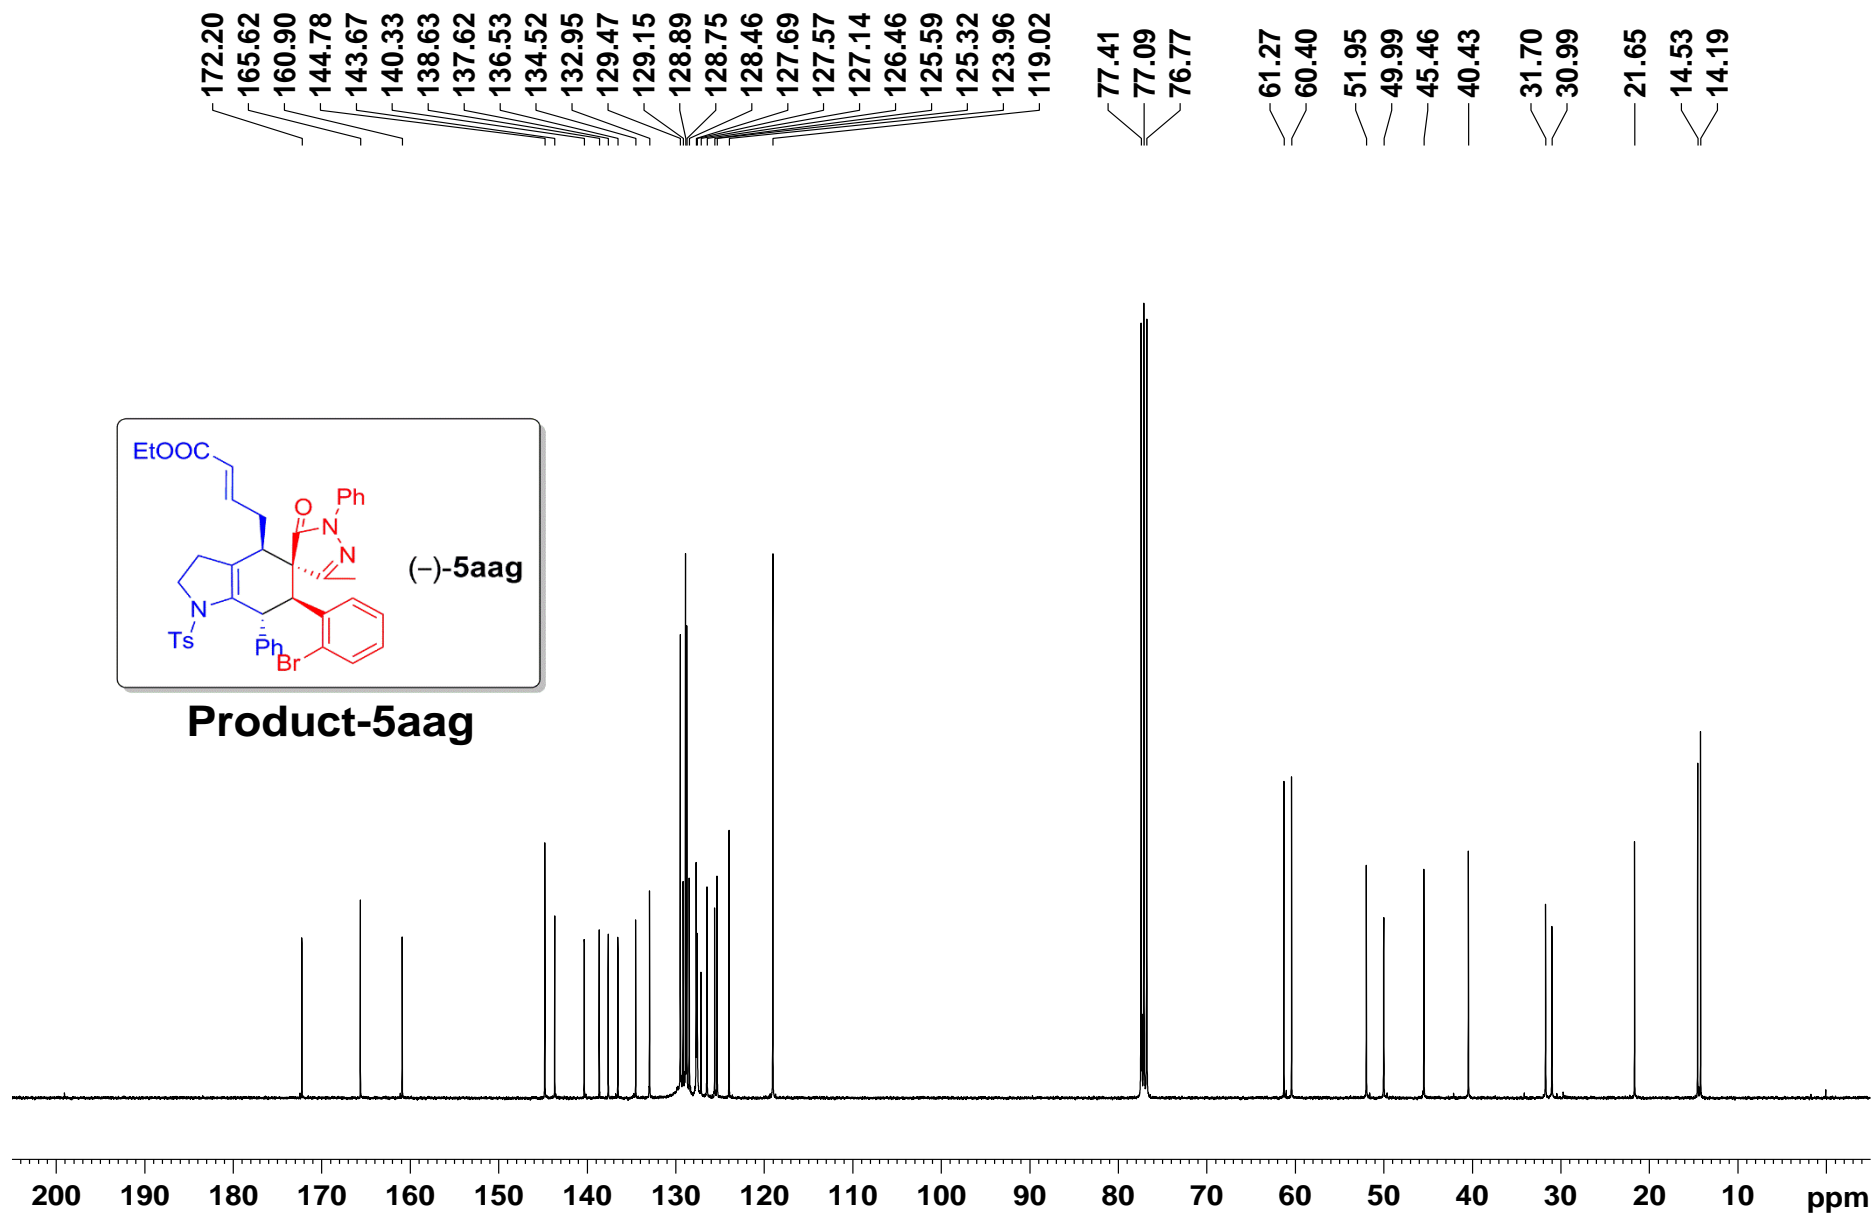

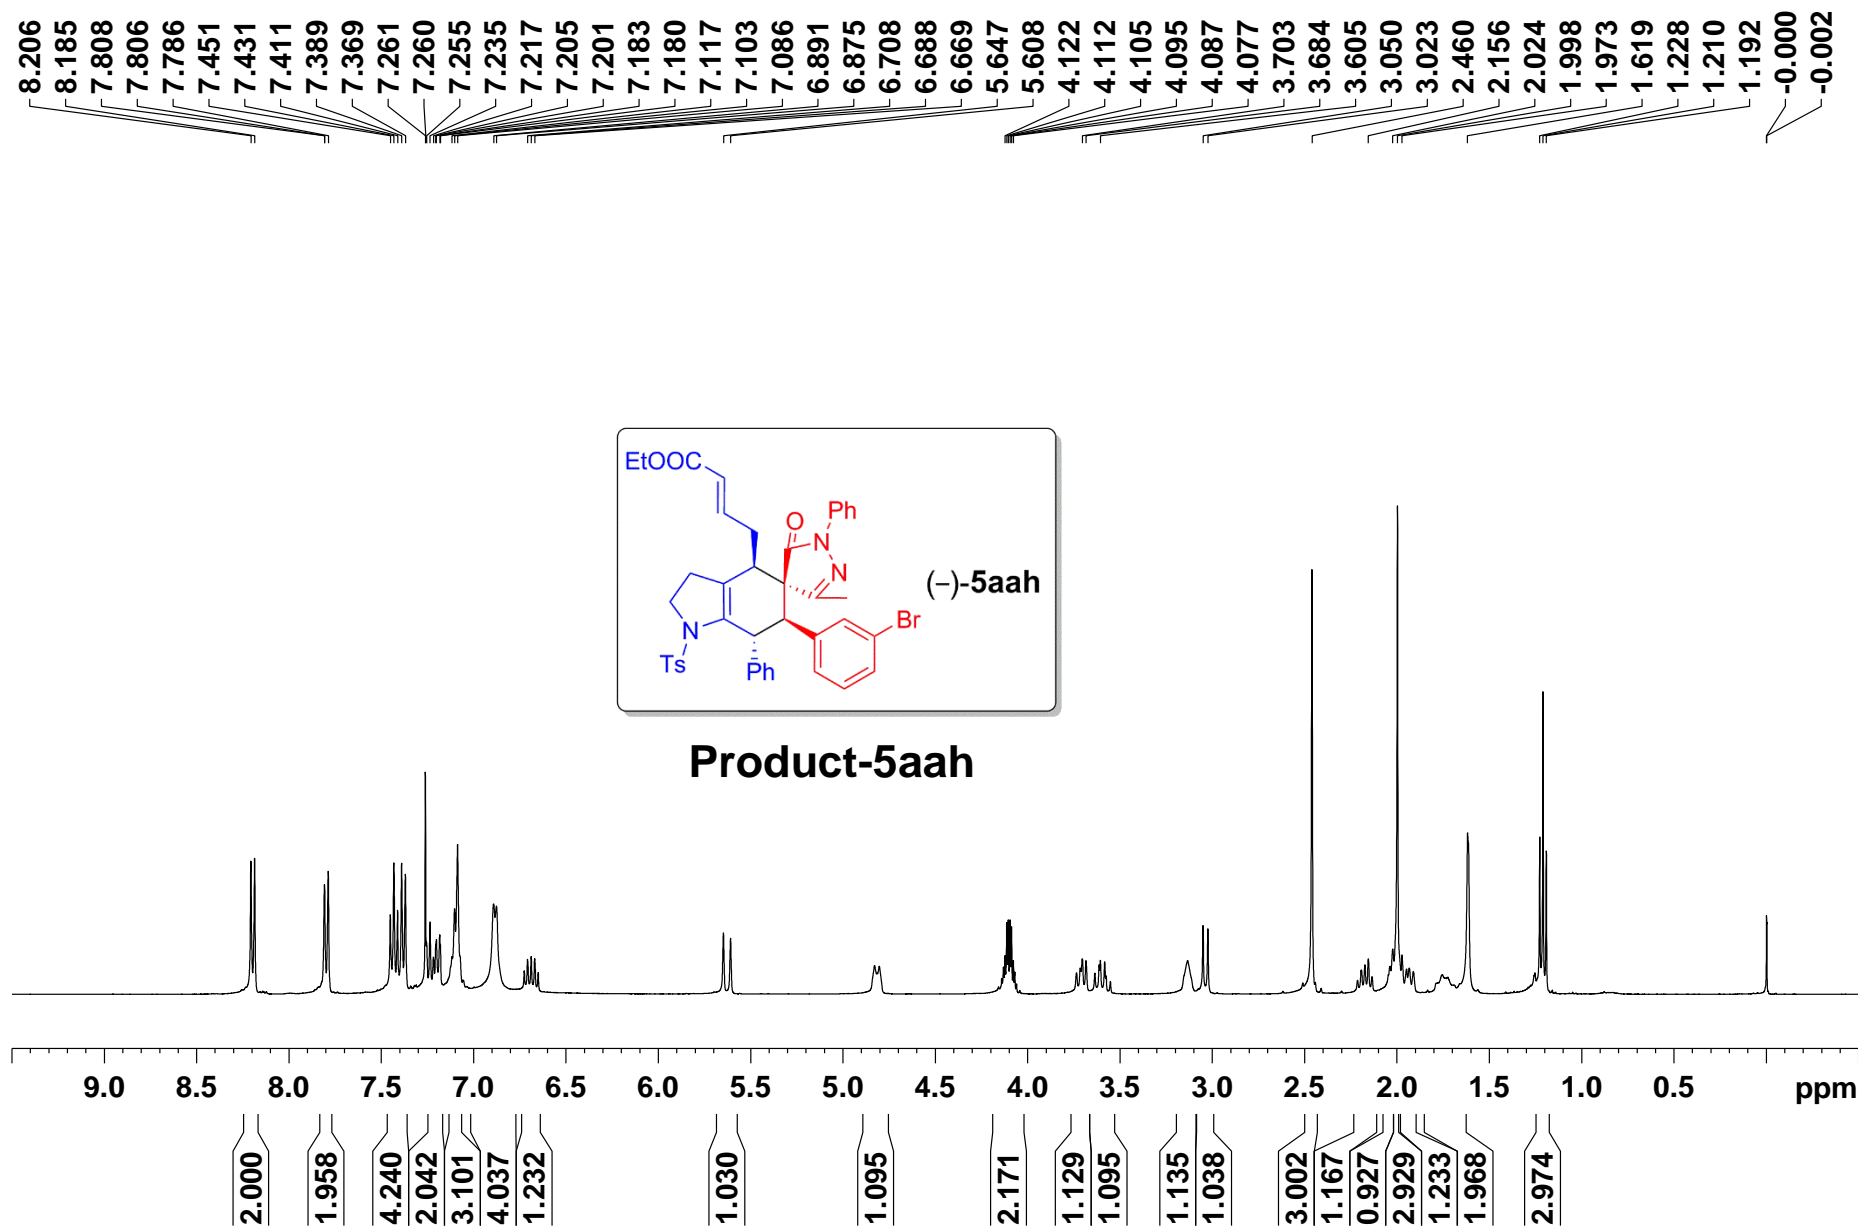

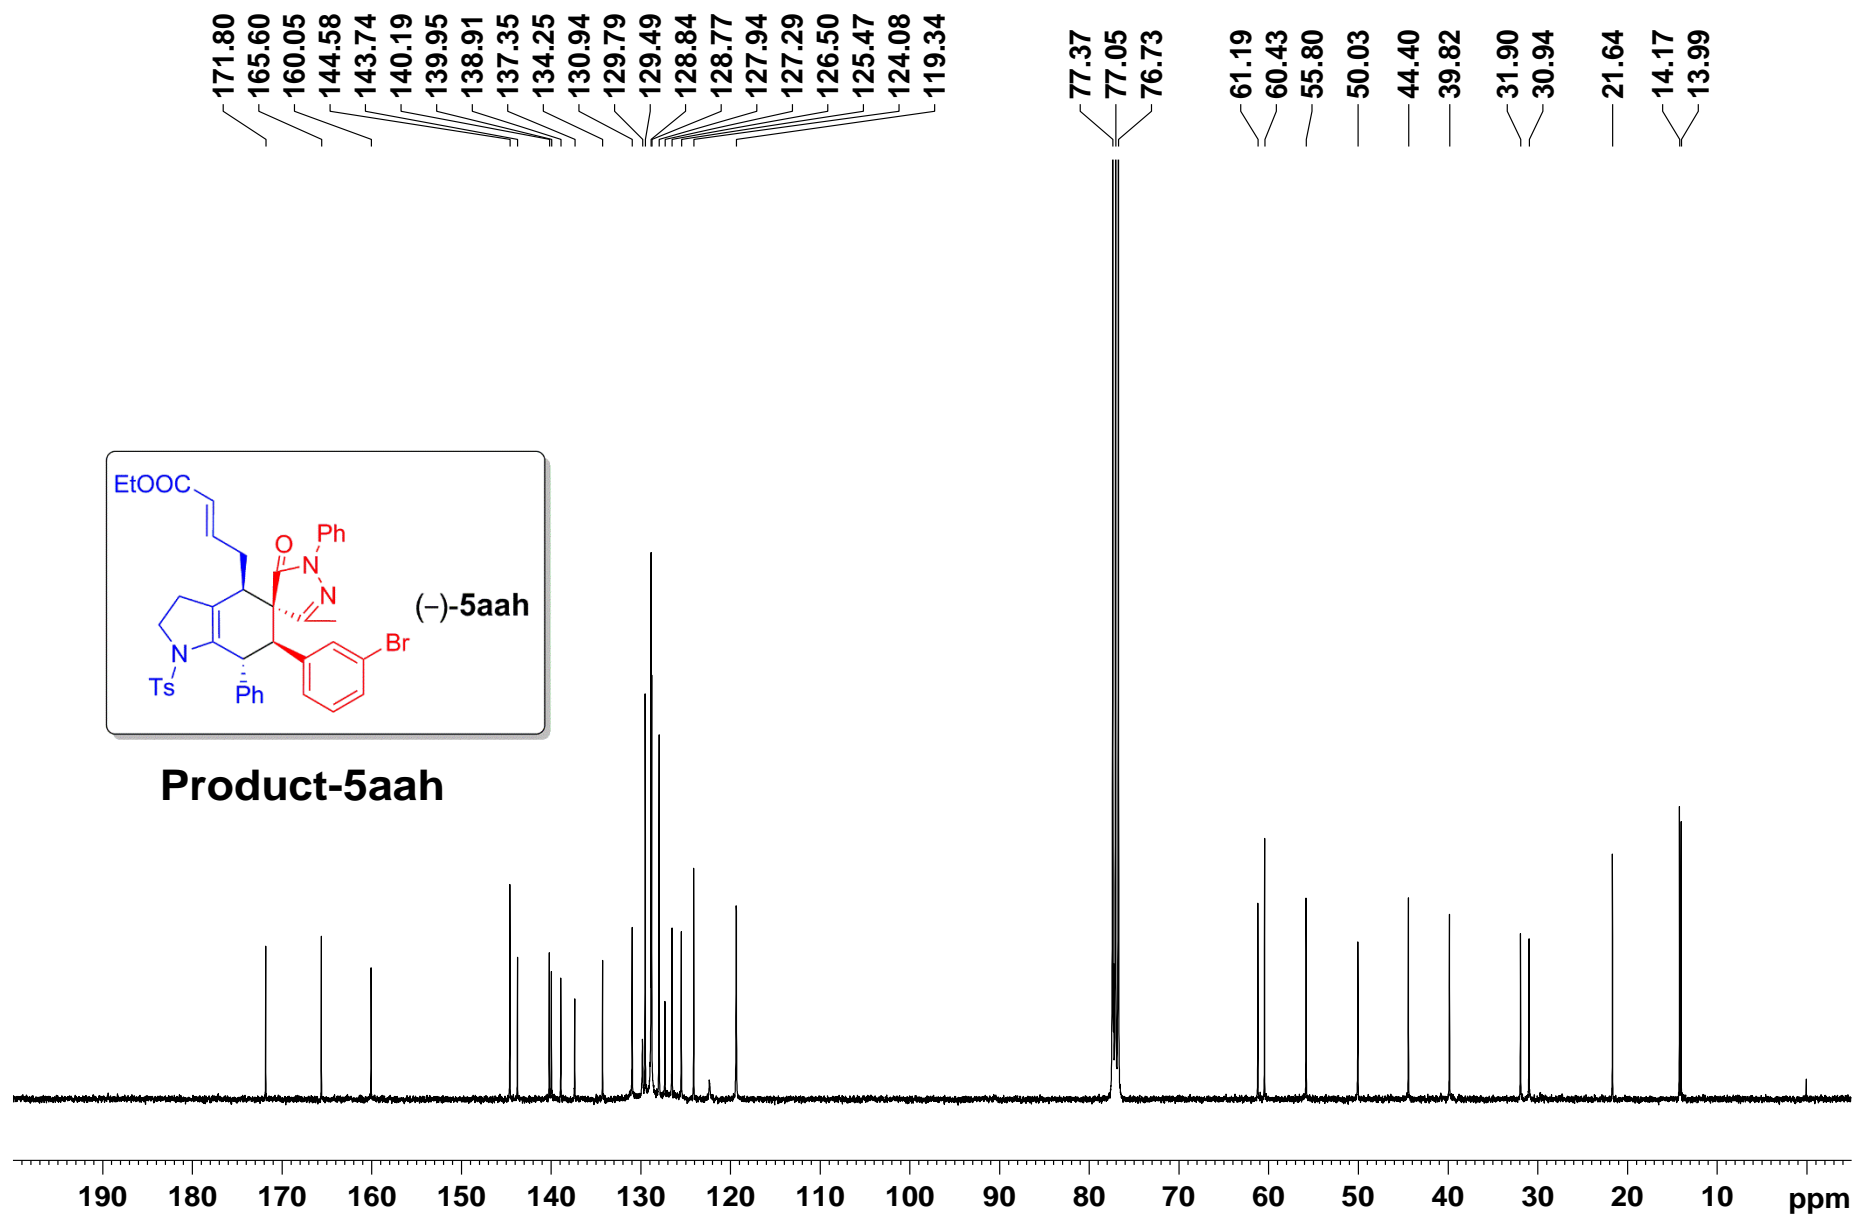

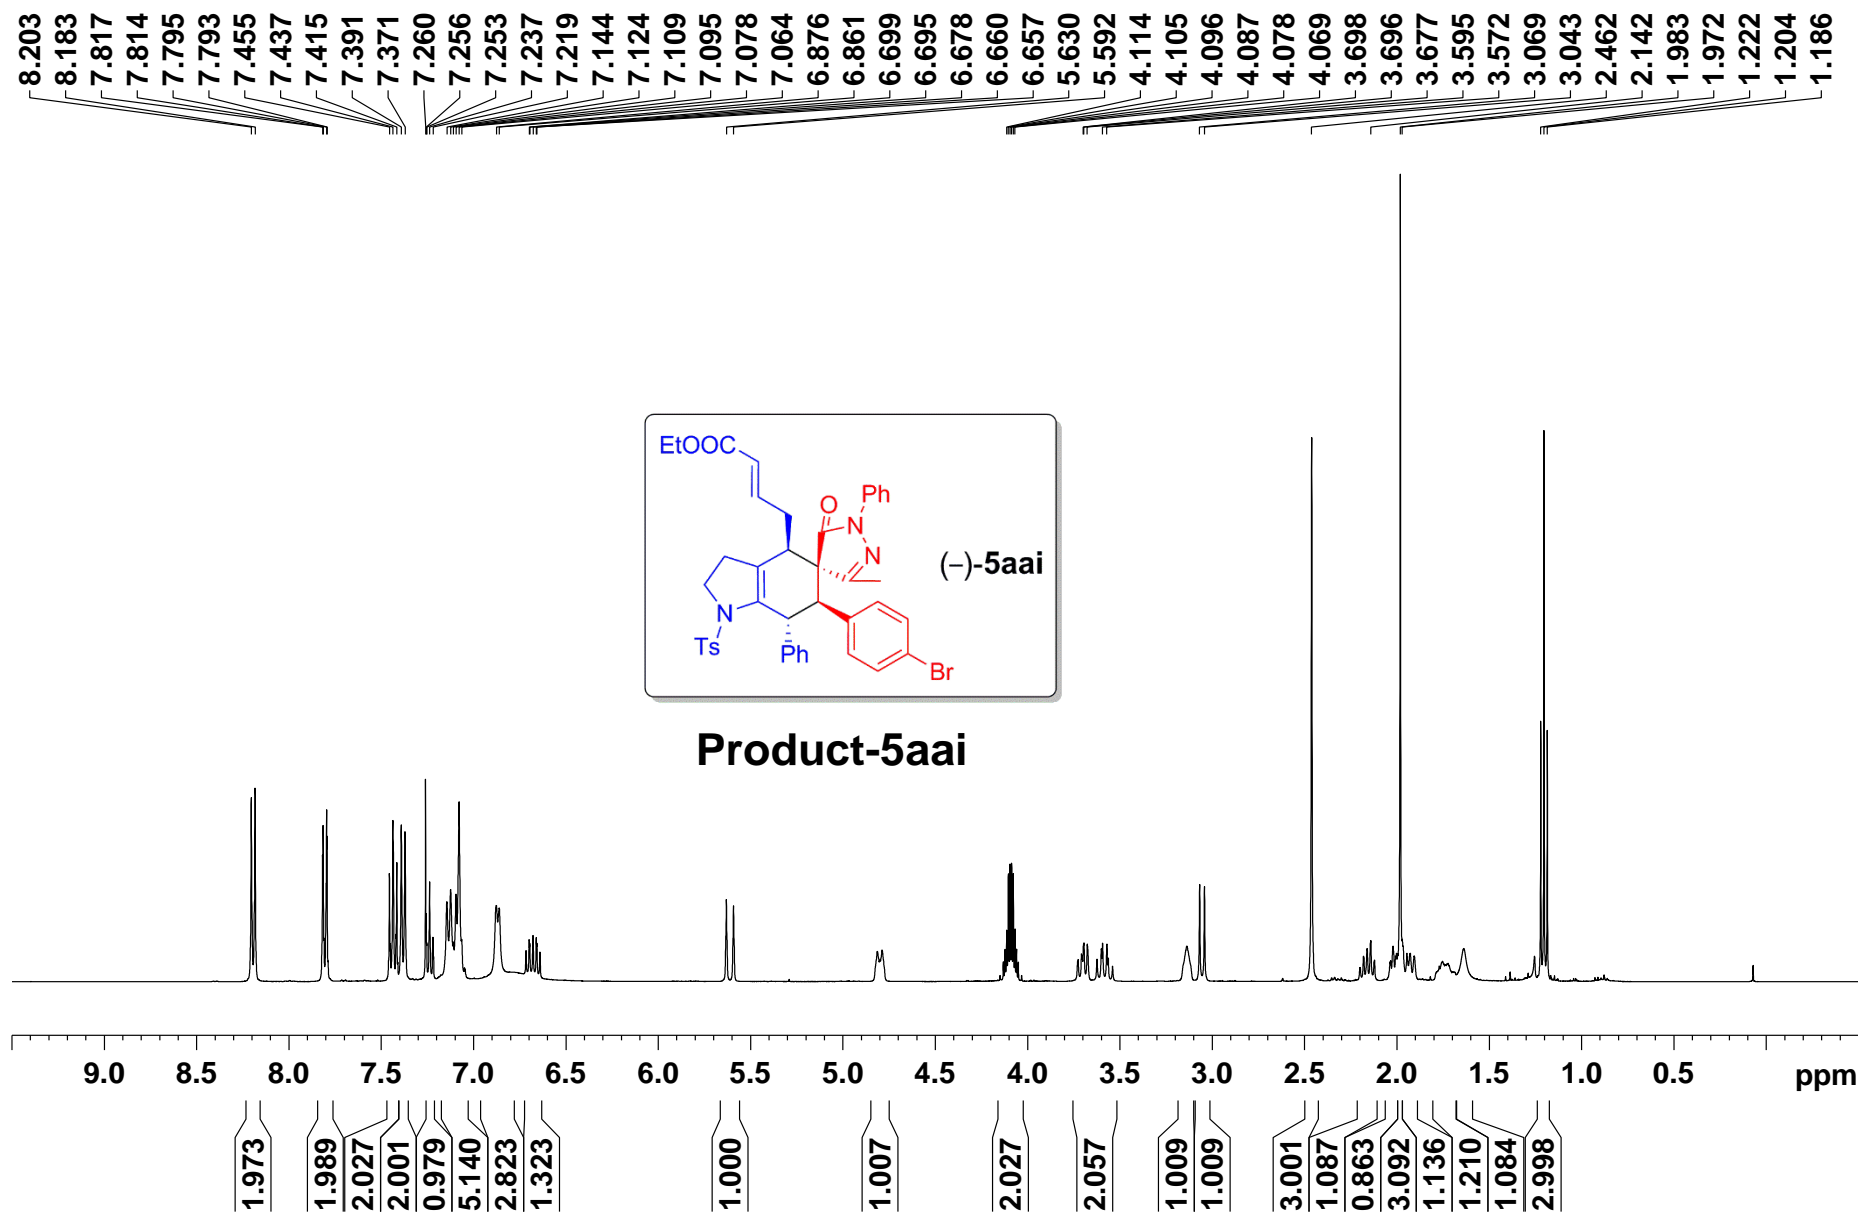



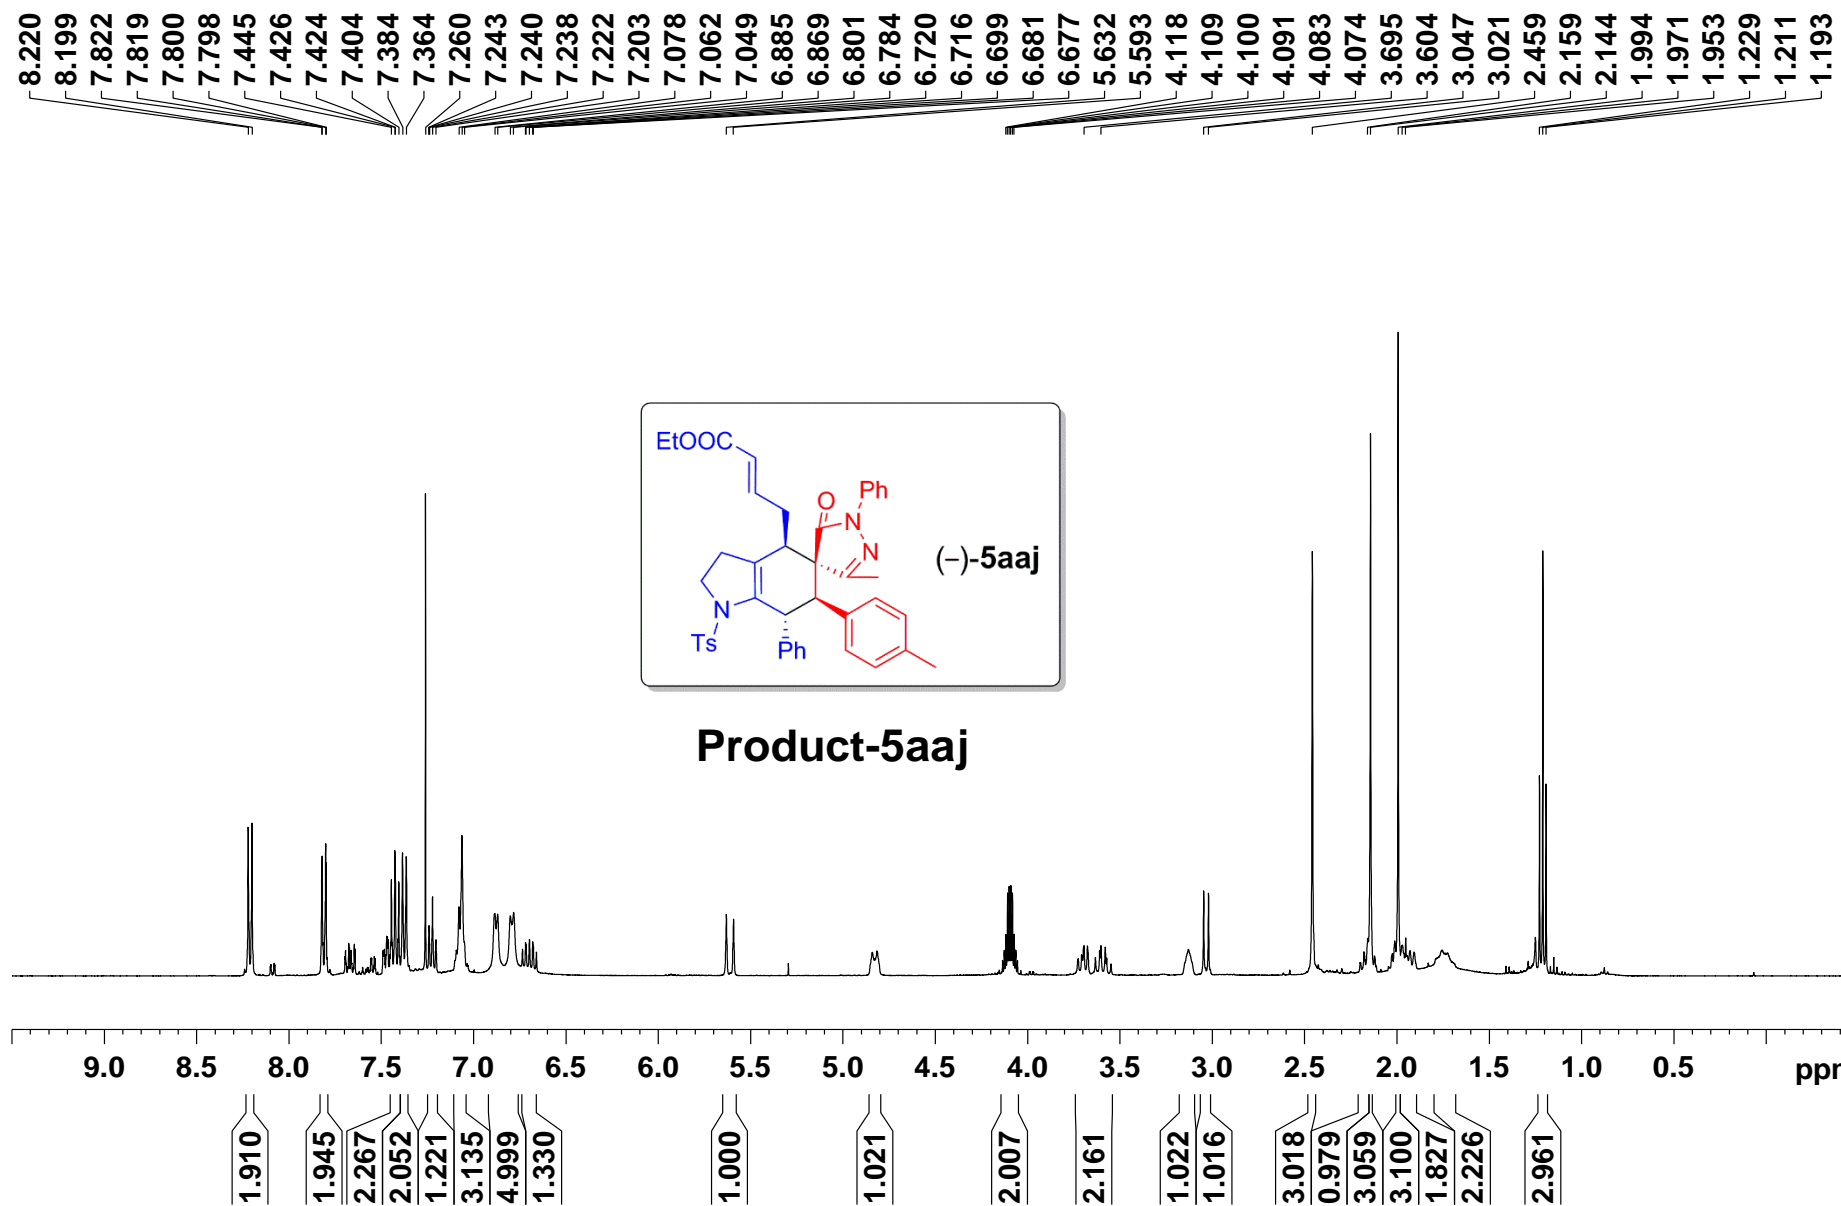

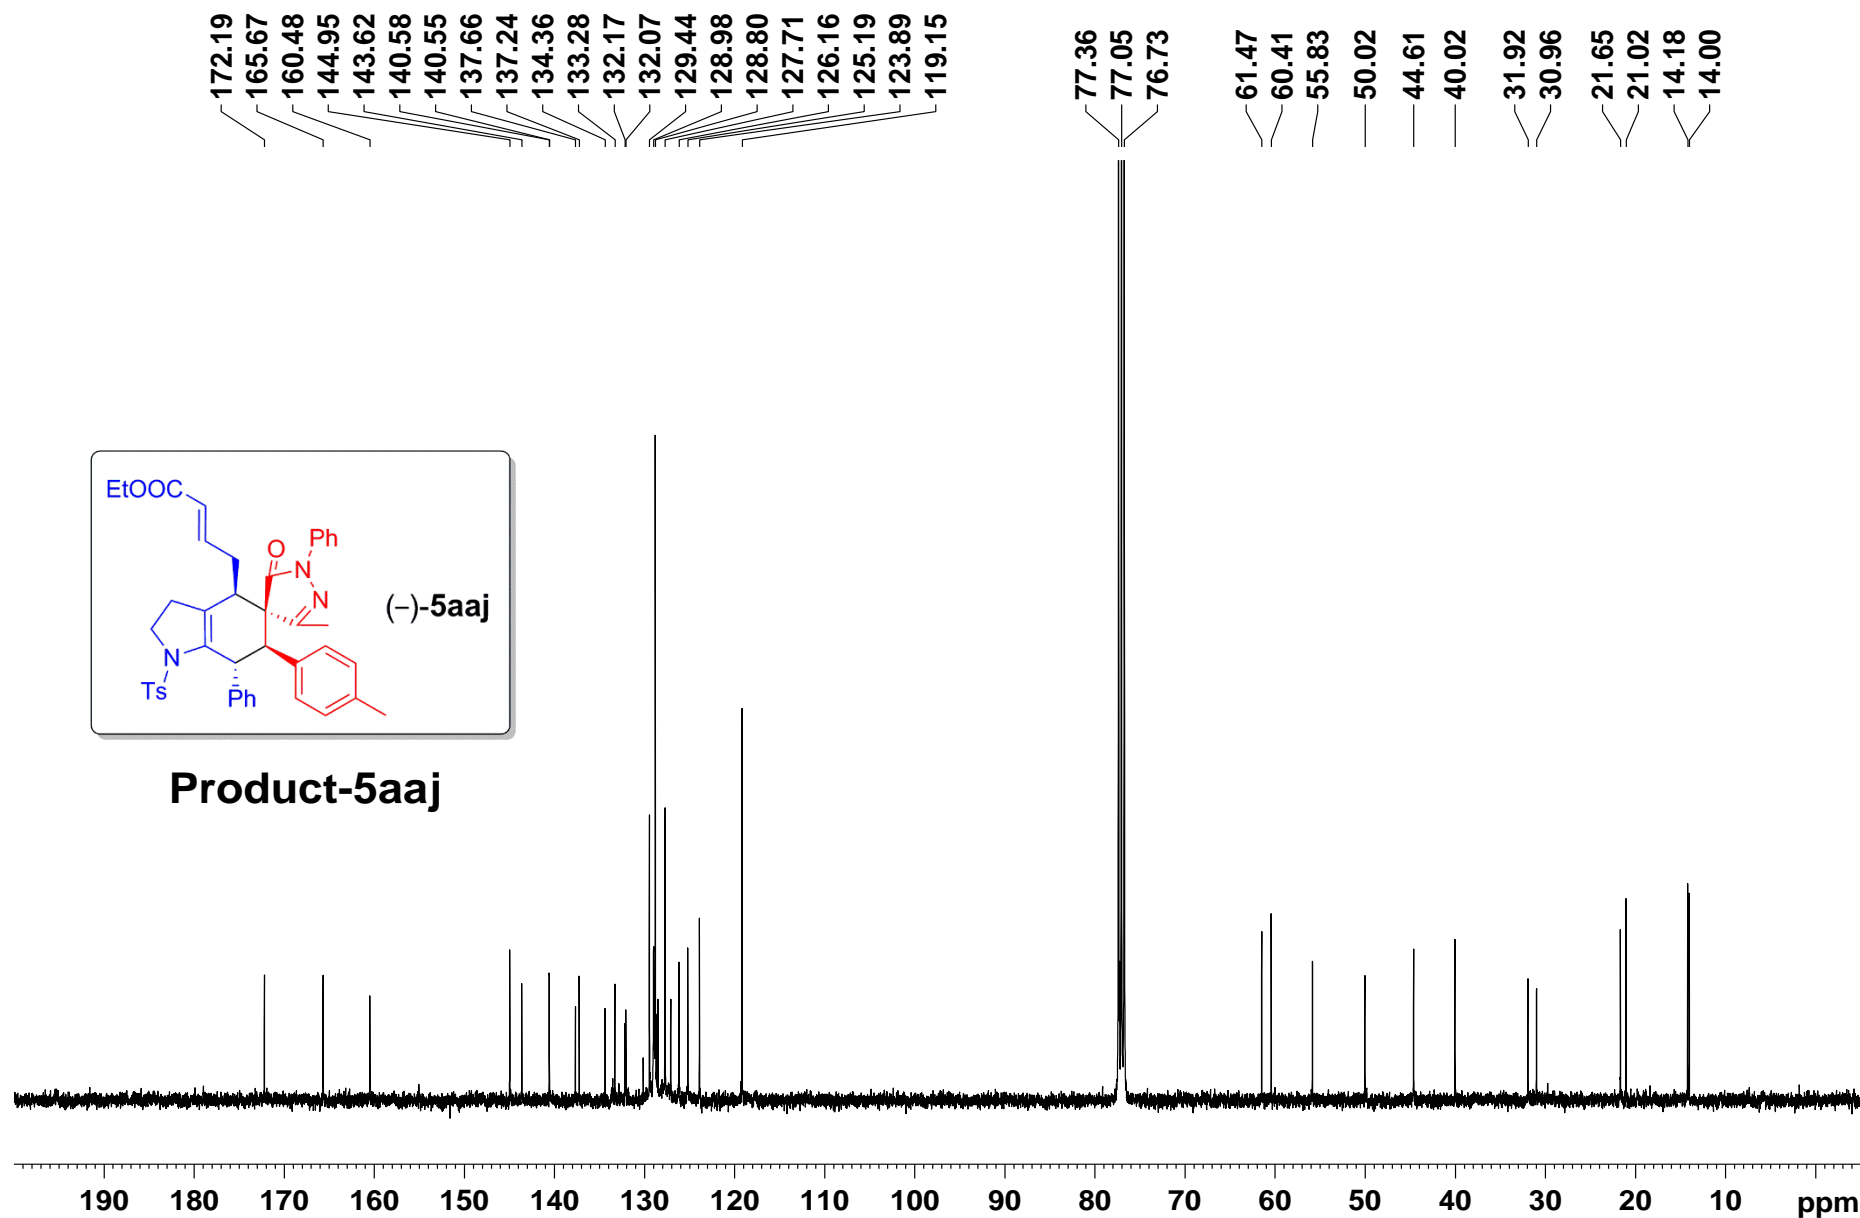

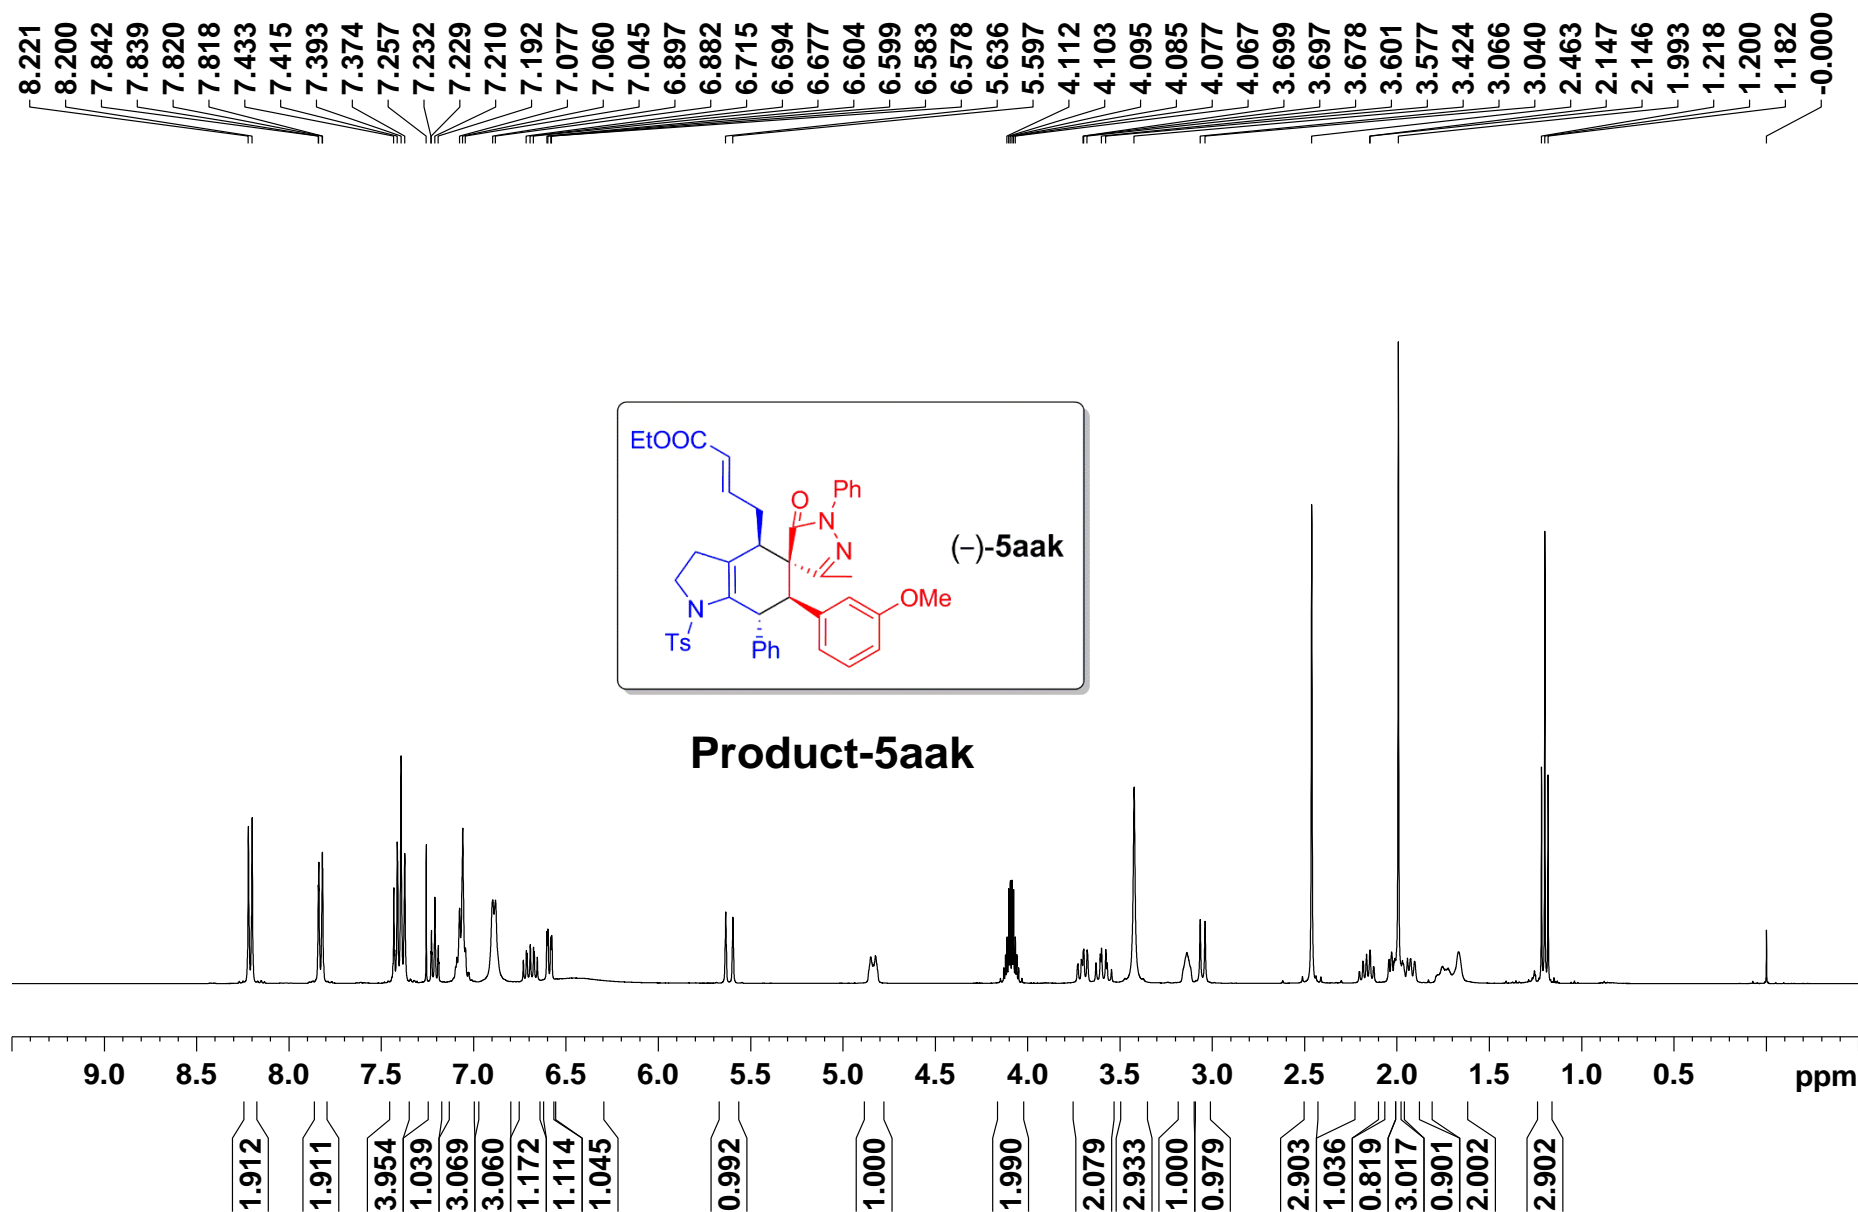



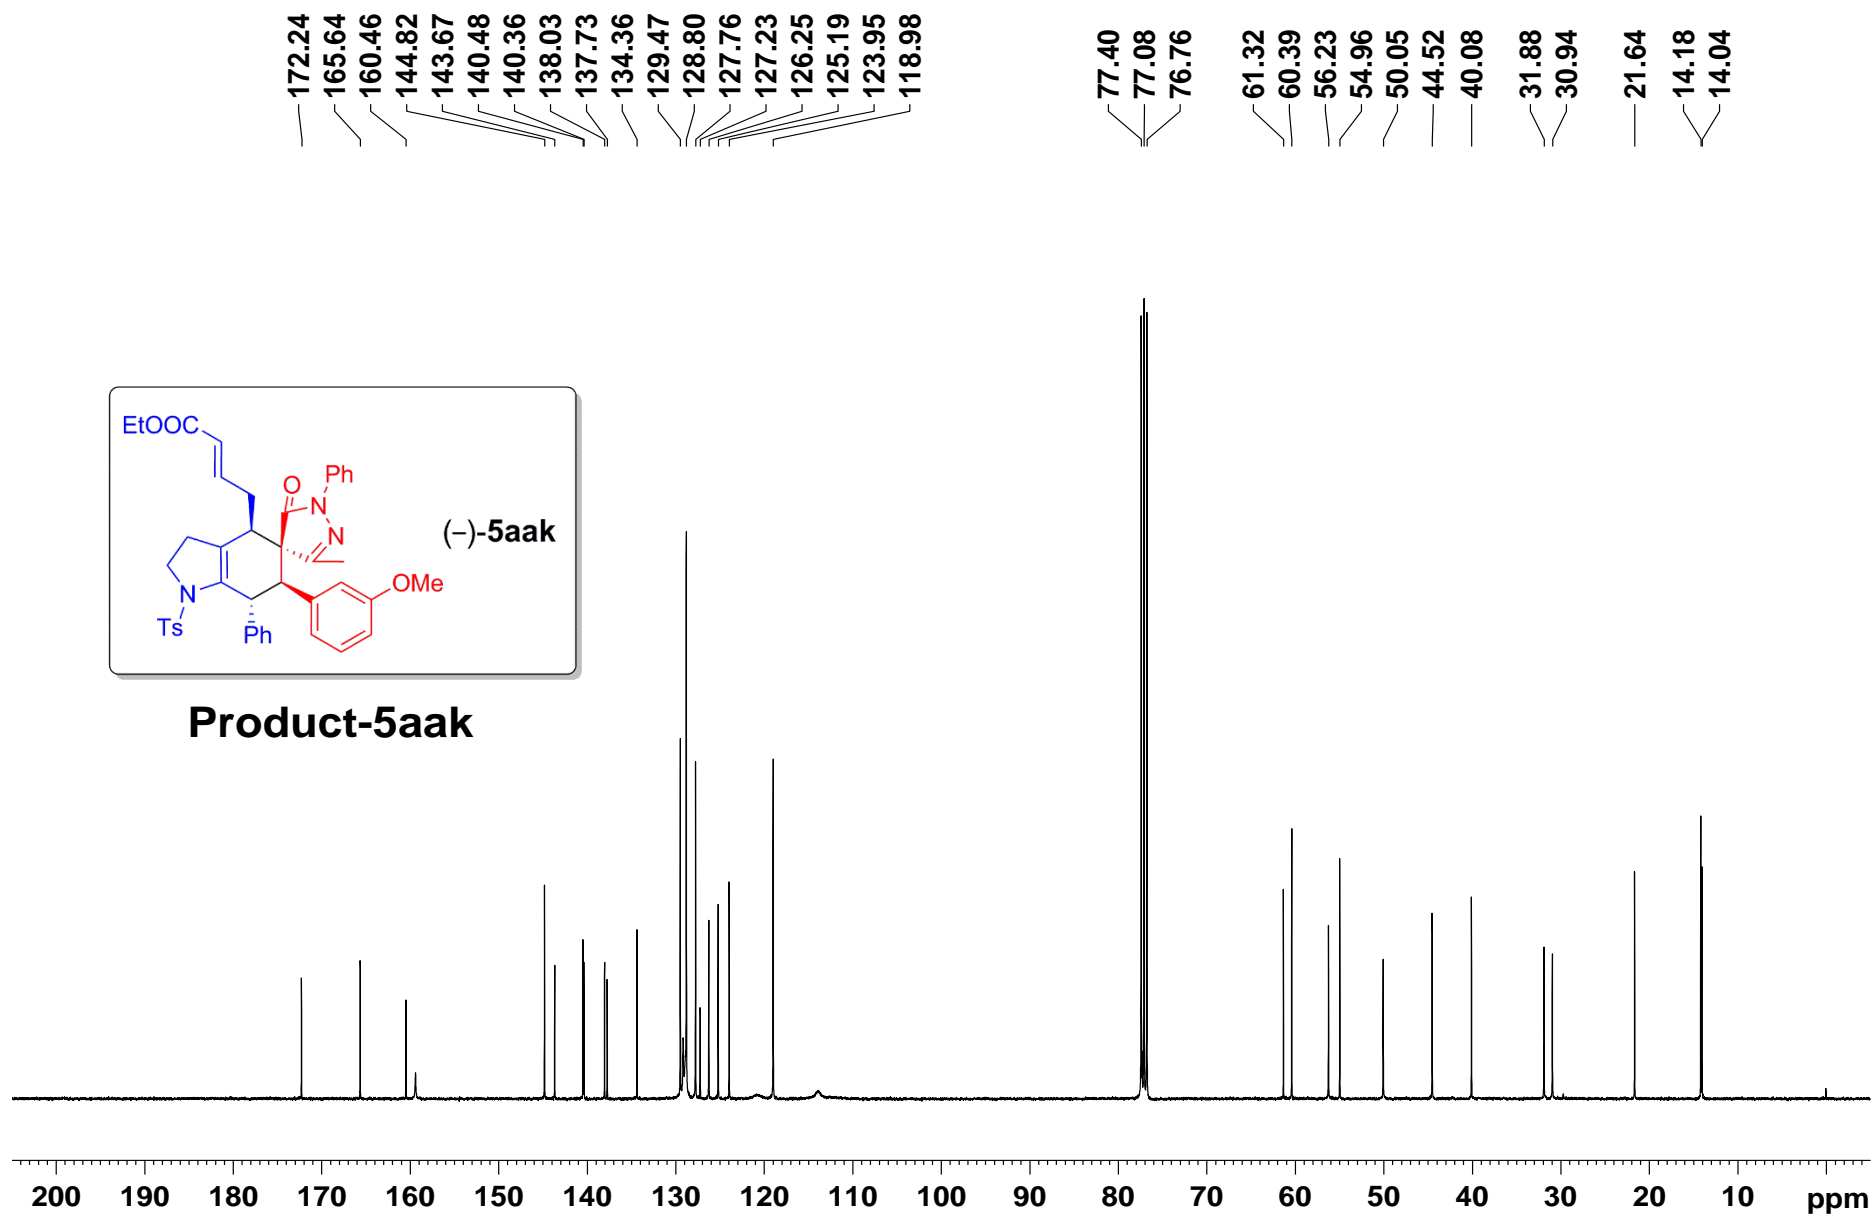

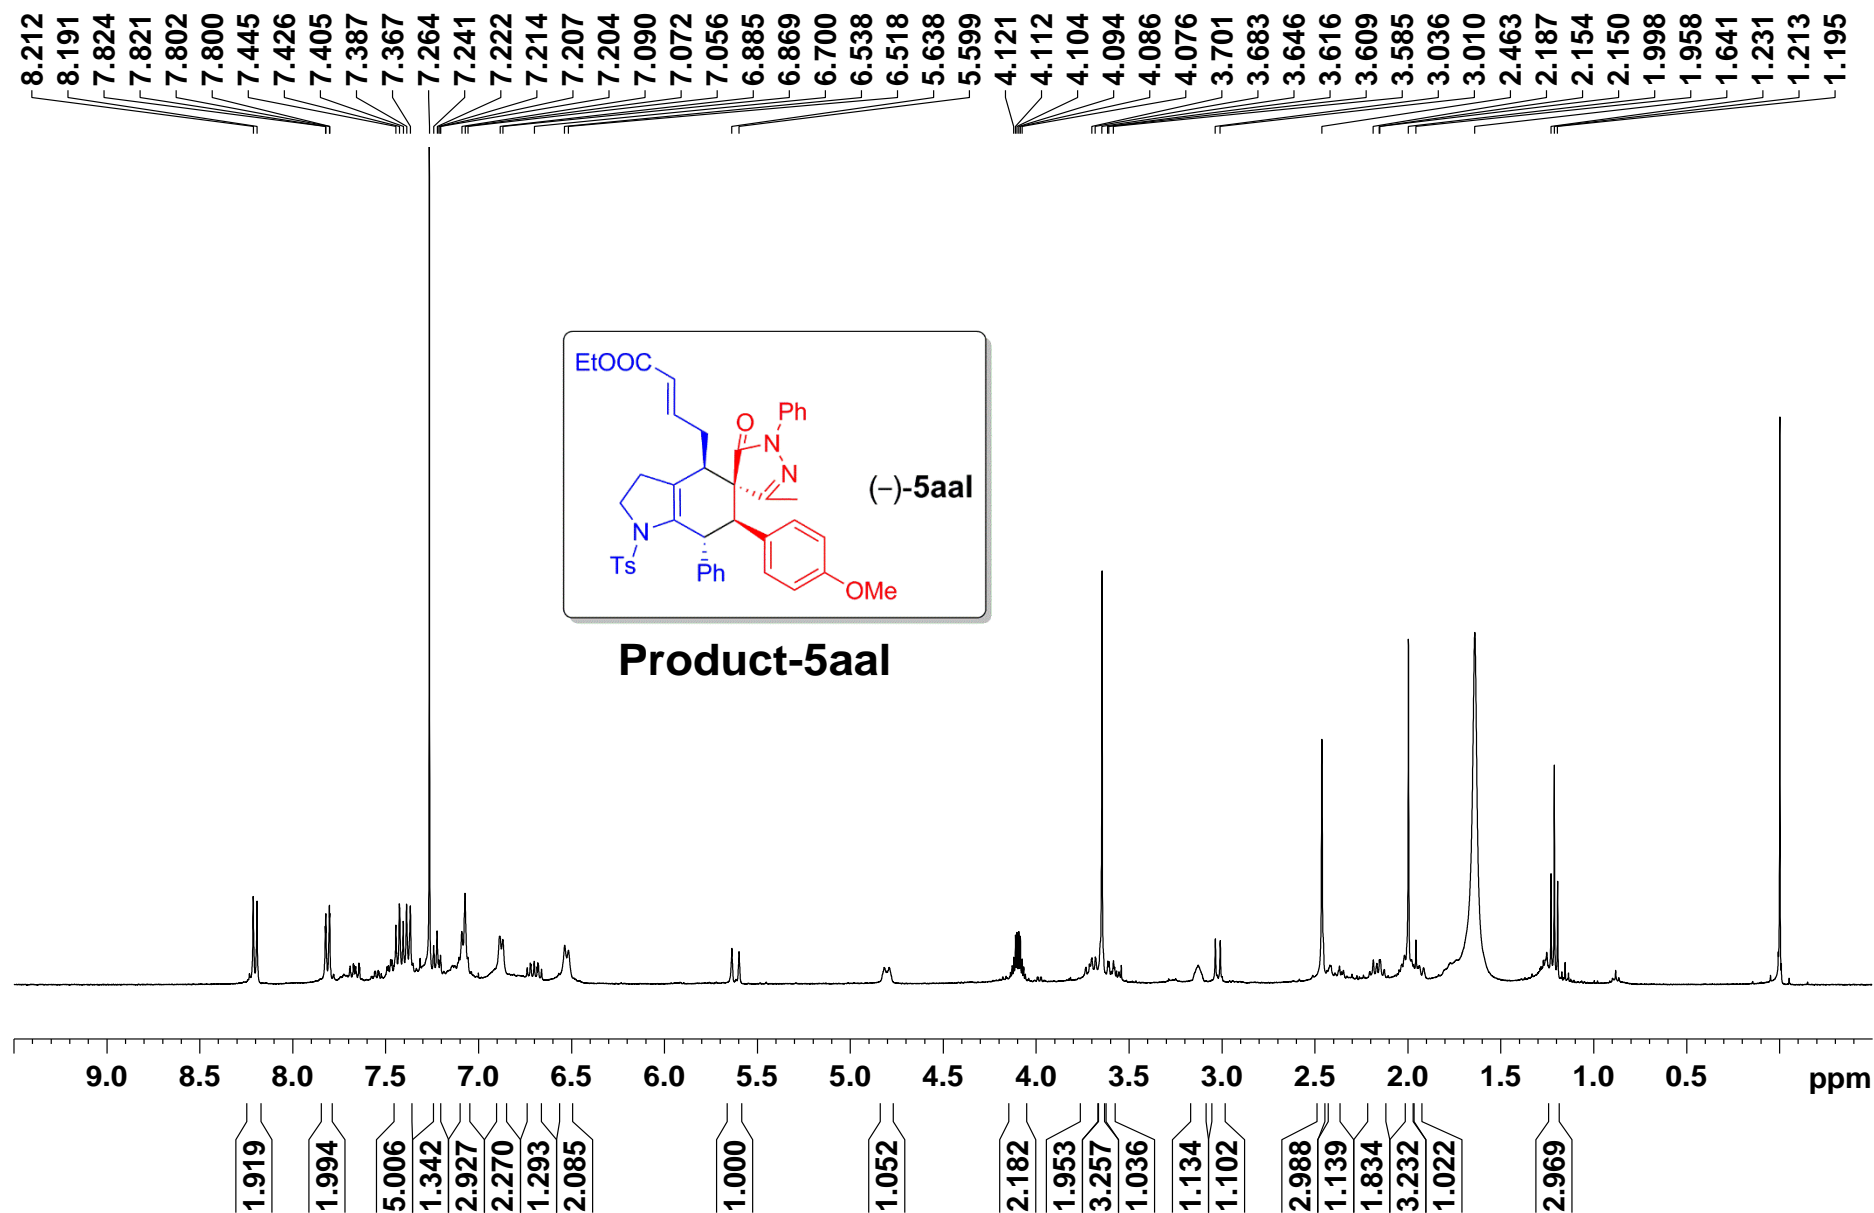

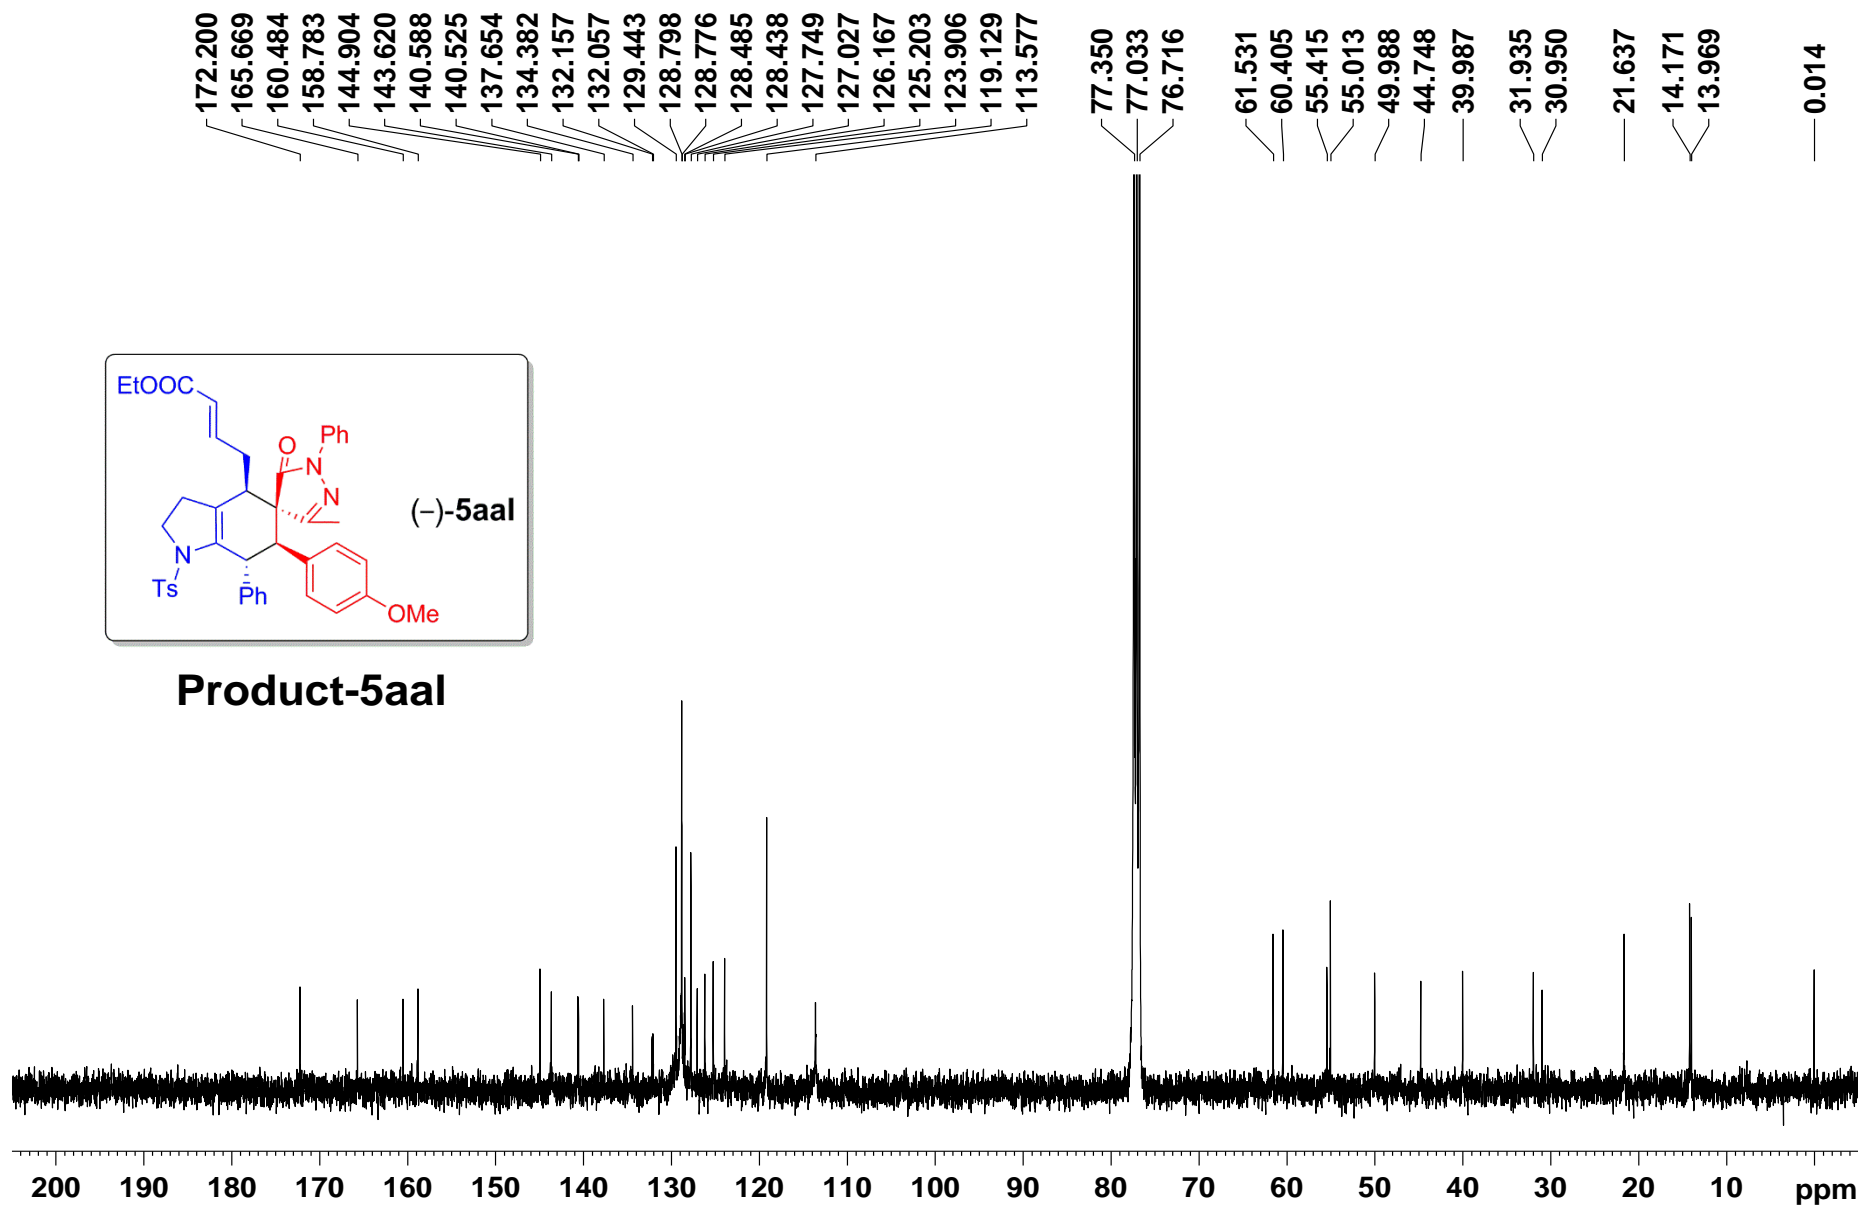

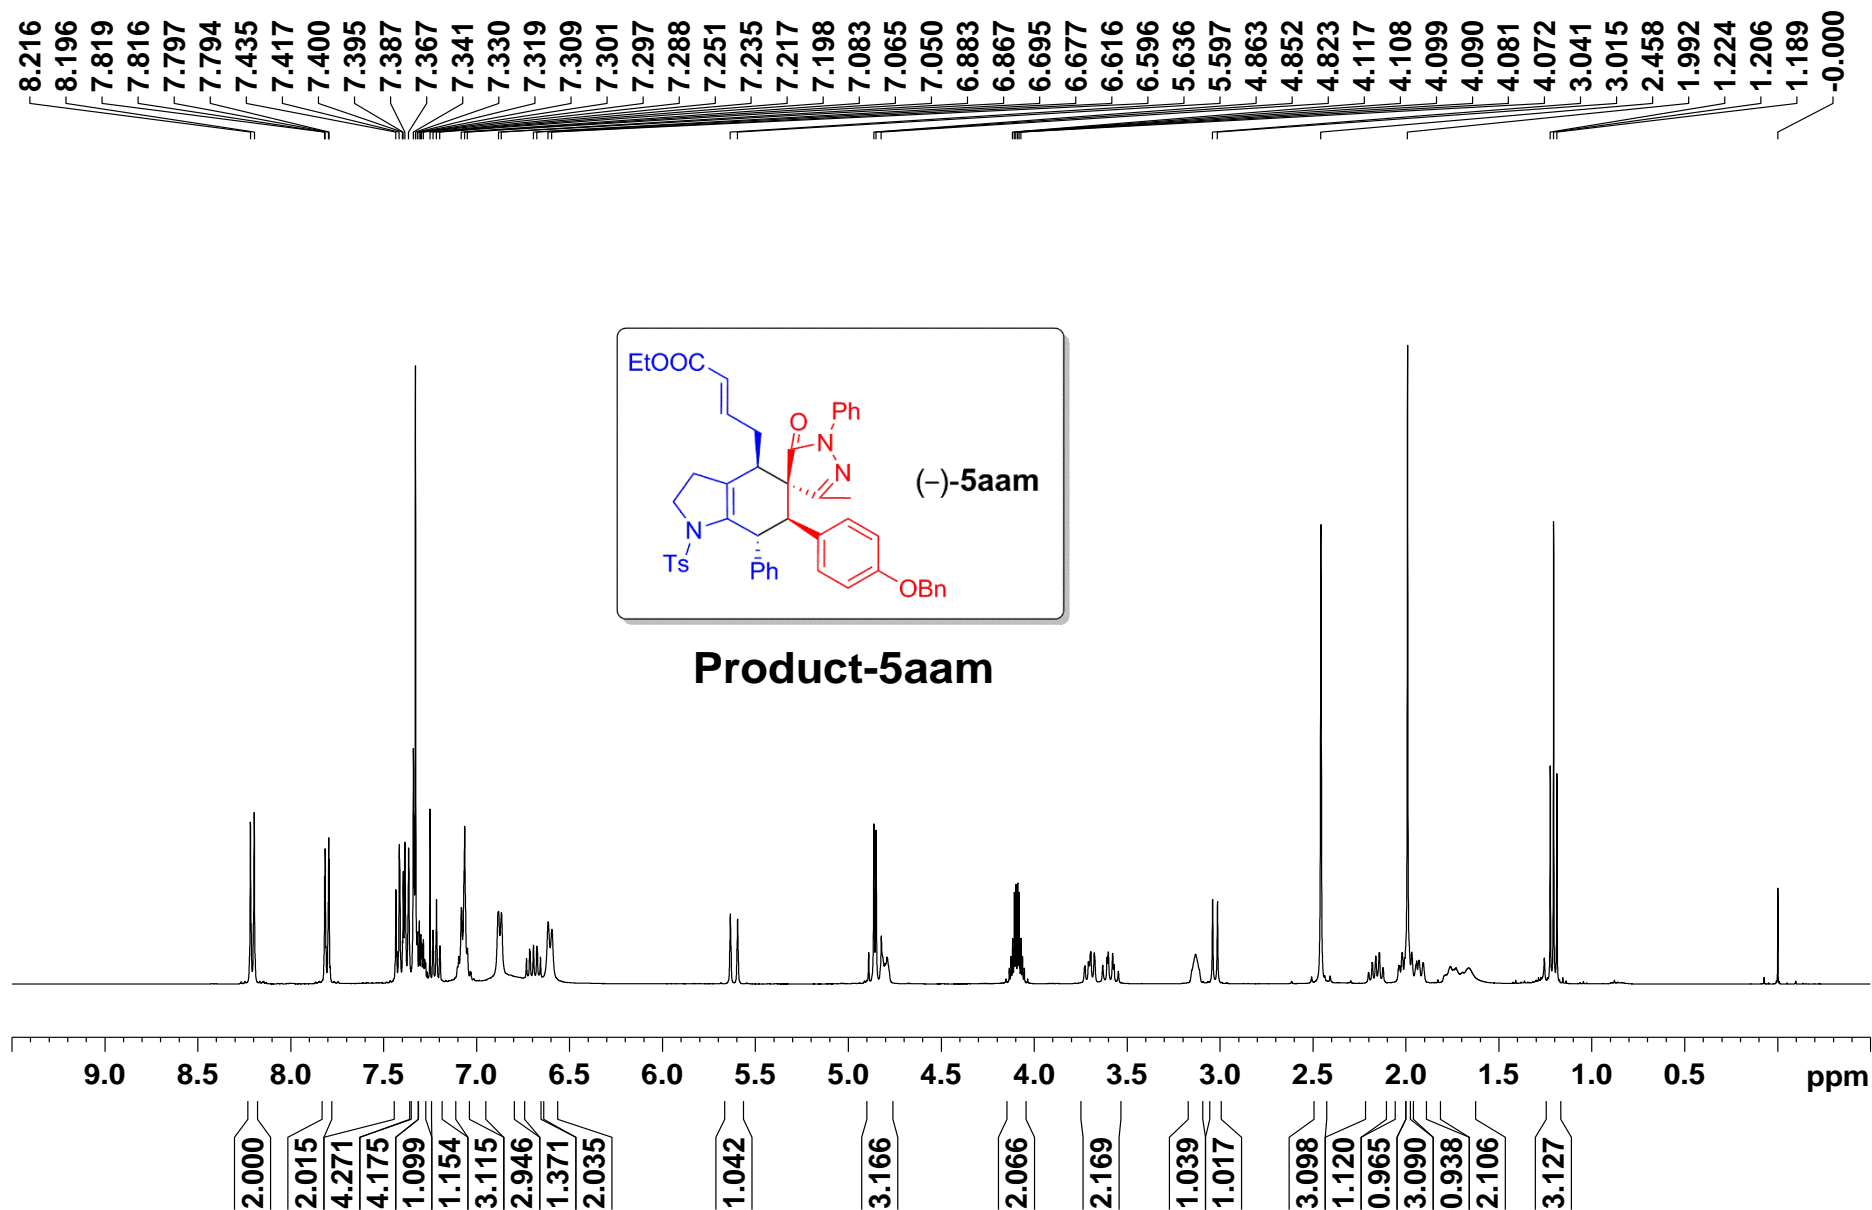

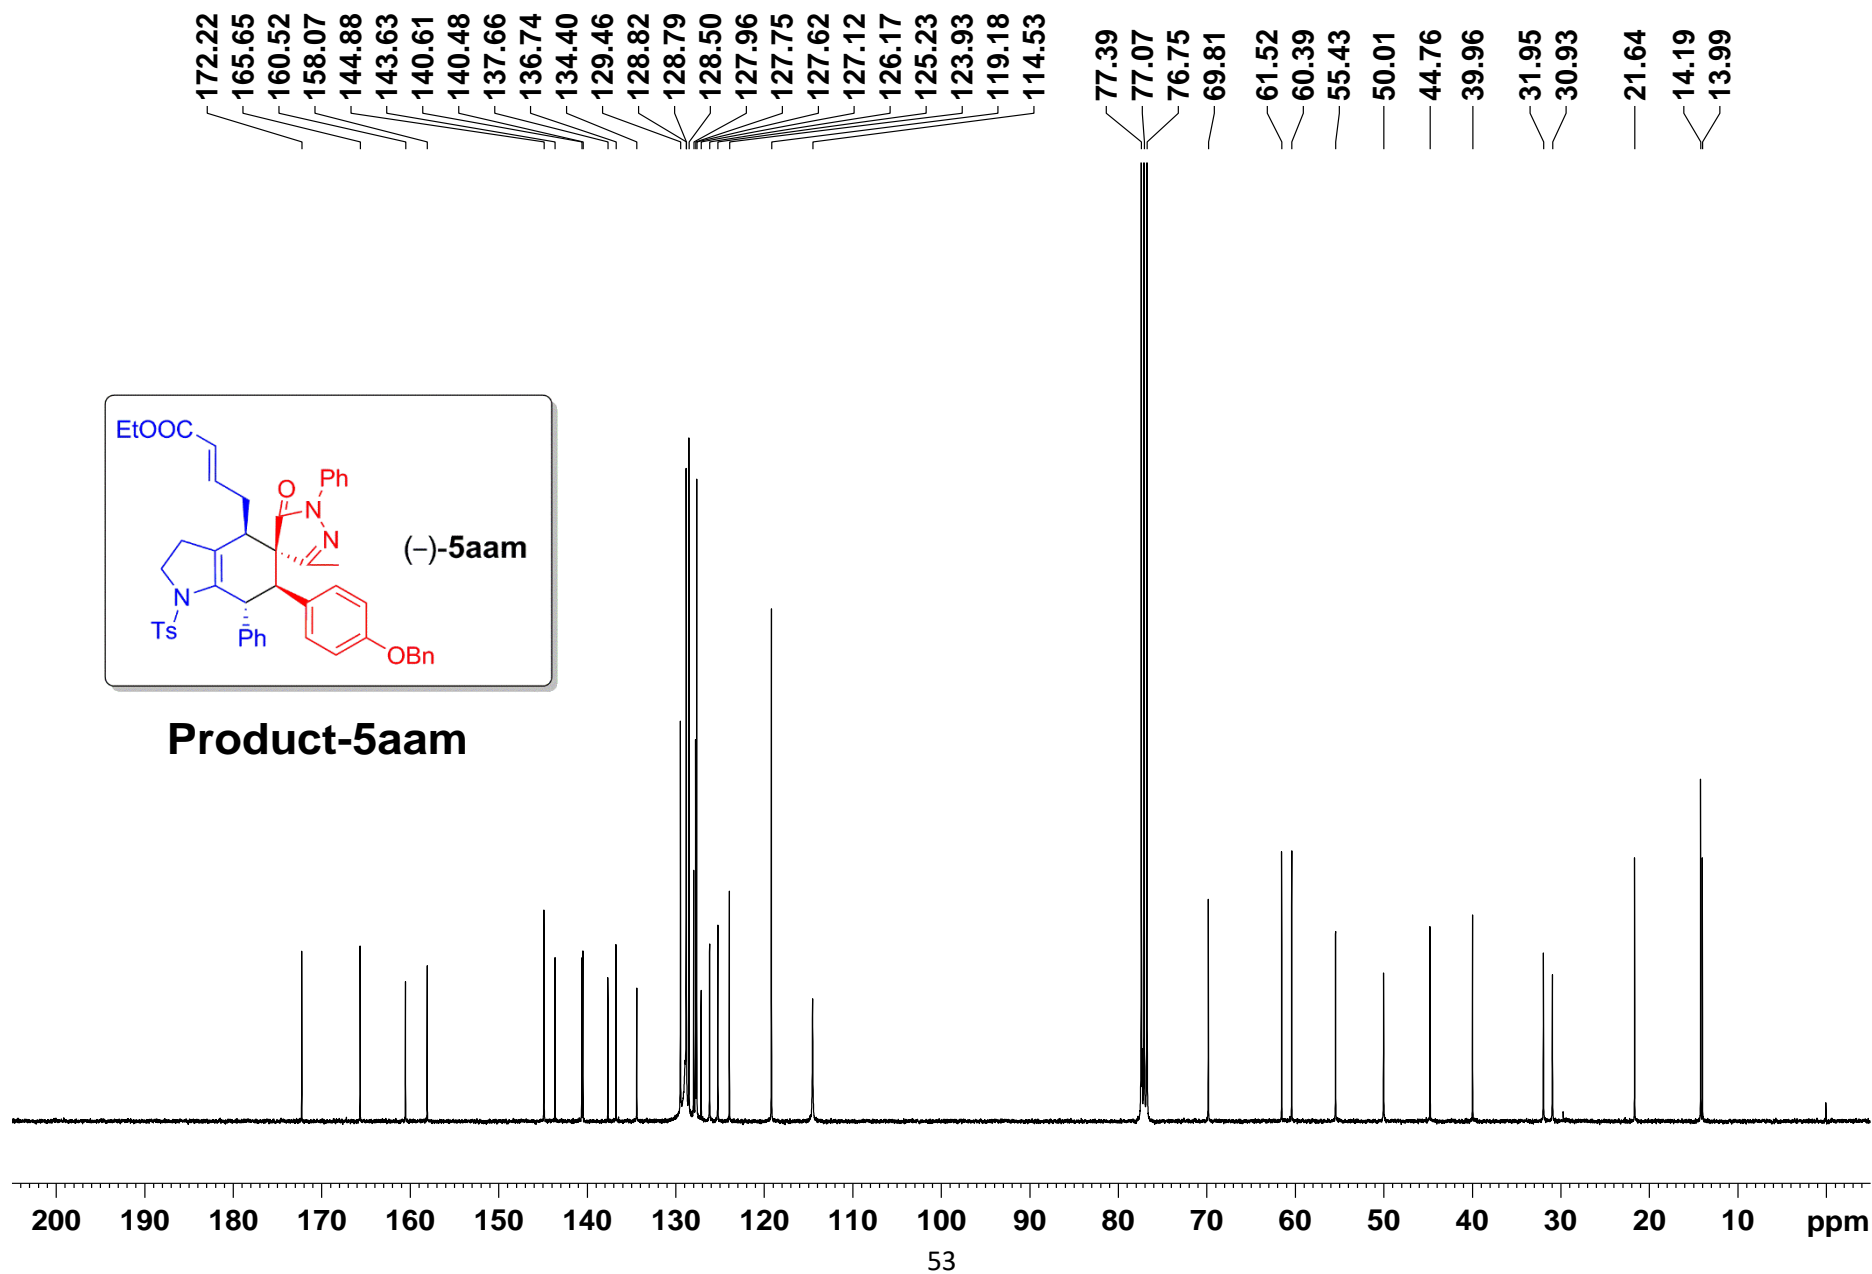

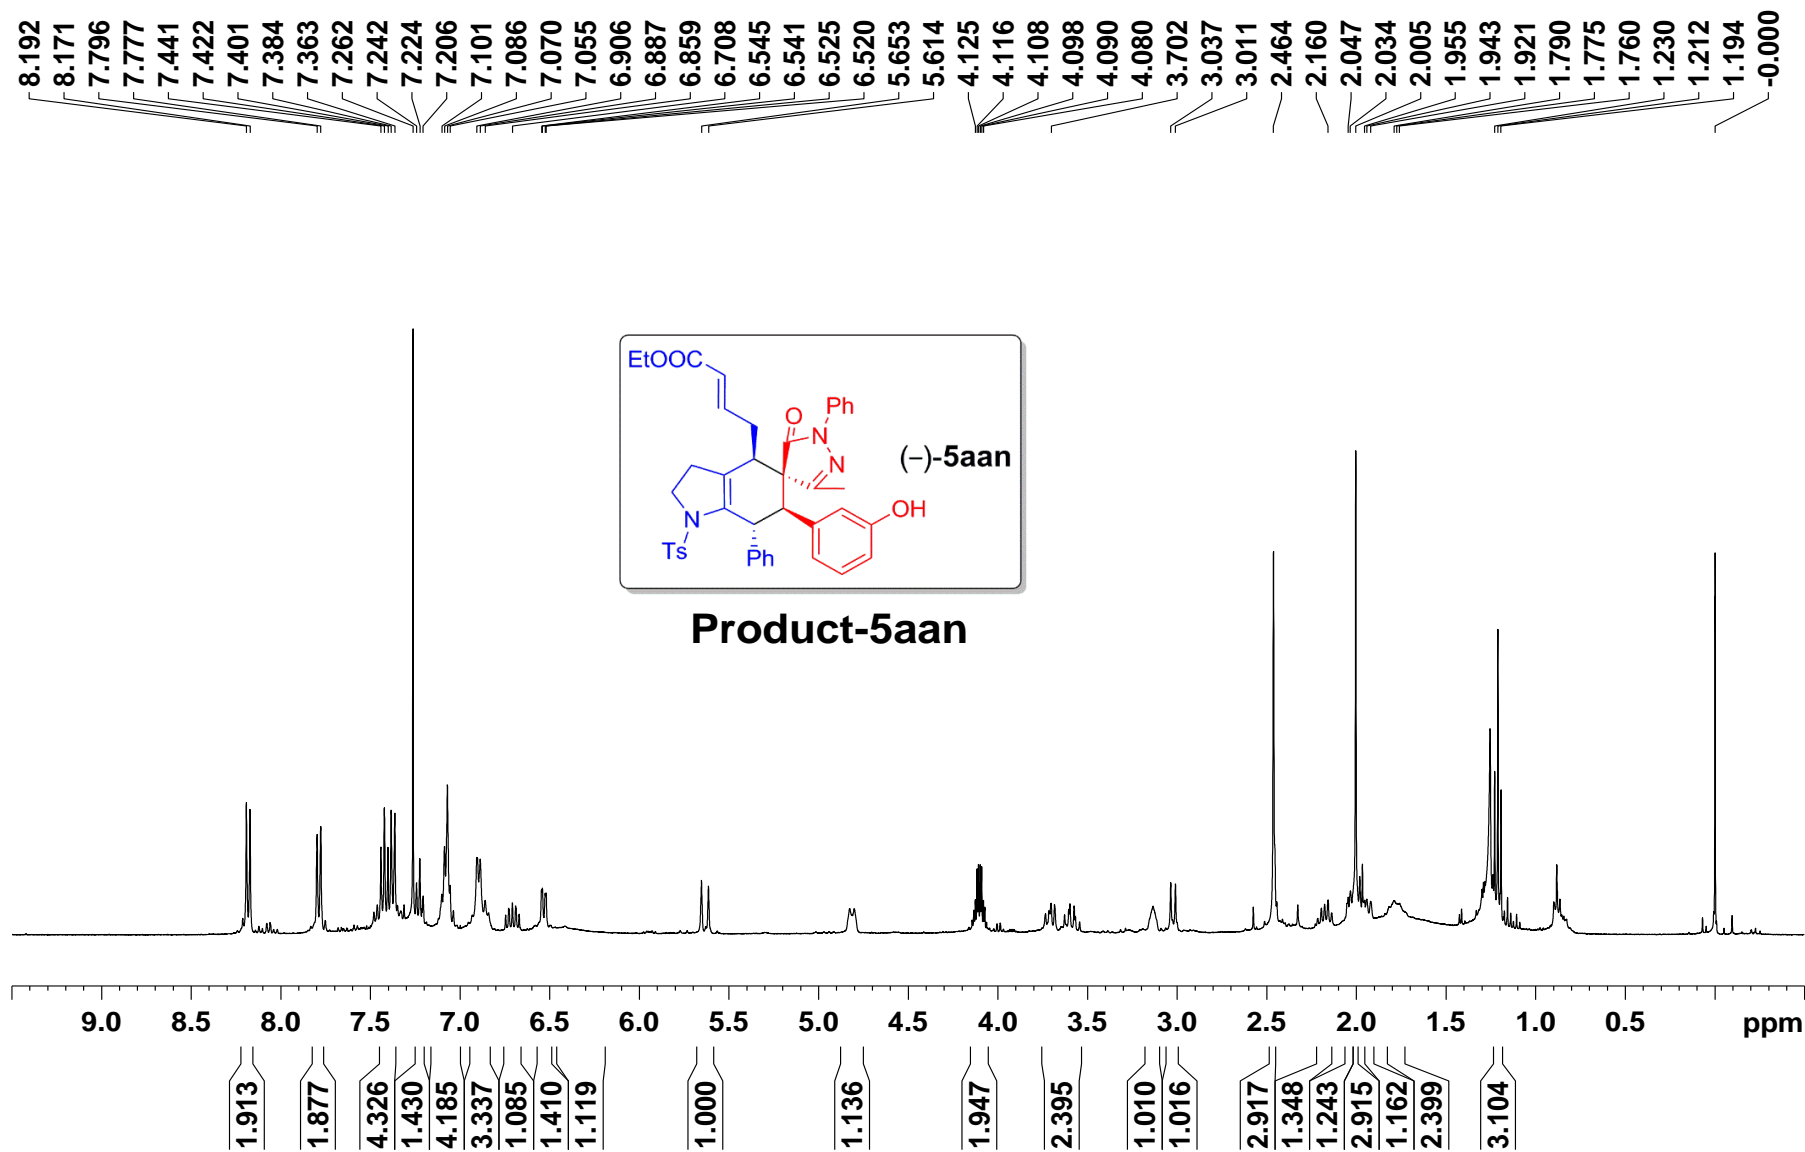

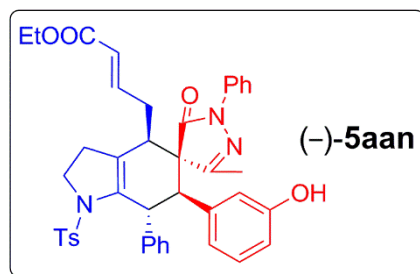

**Product-5aan**

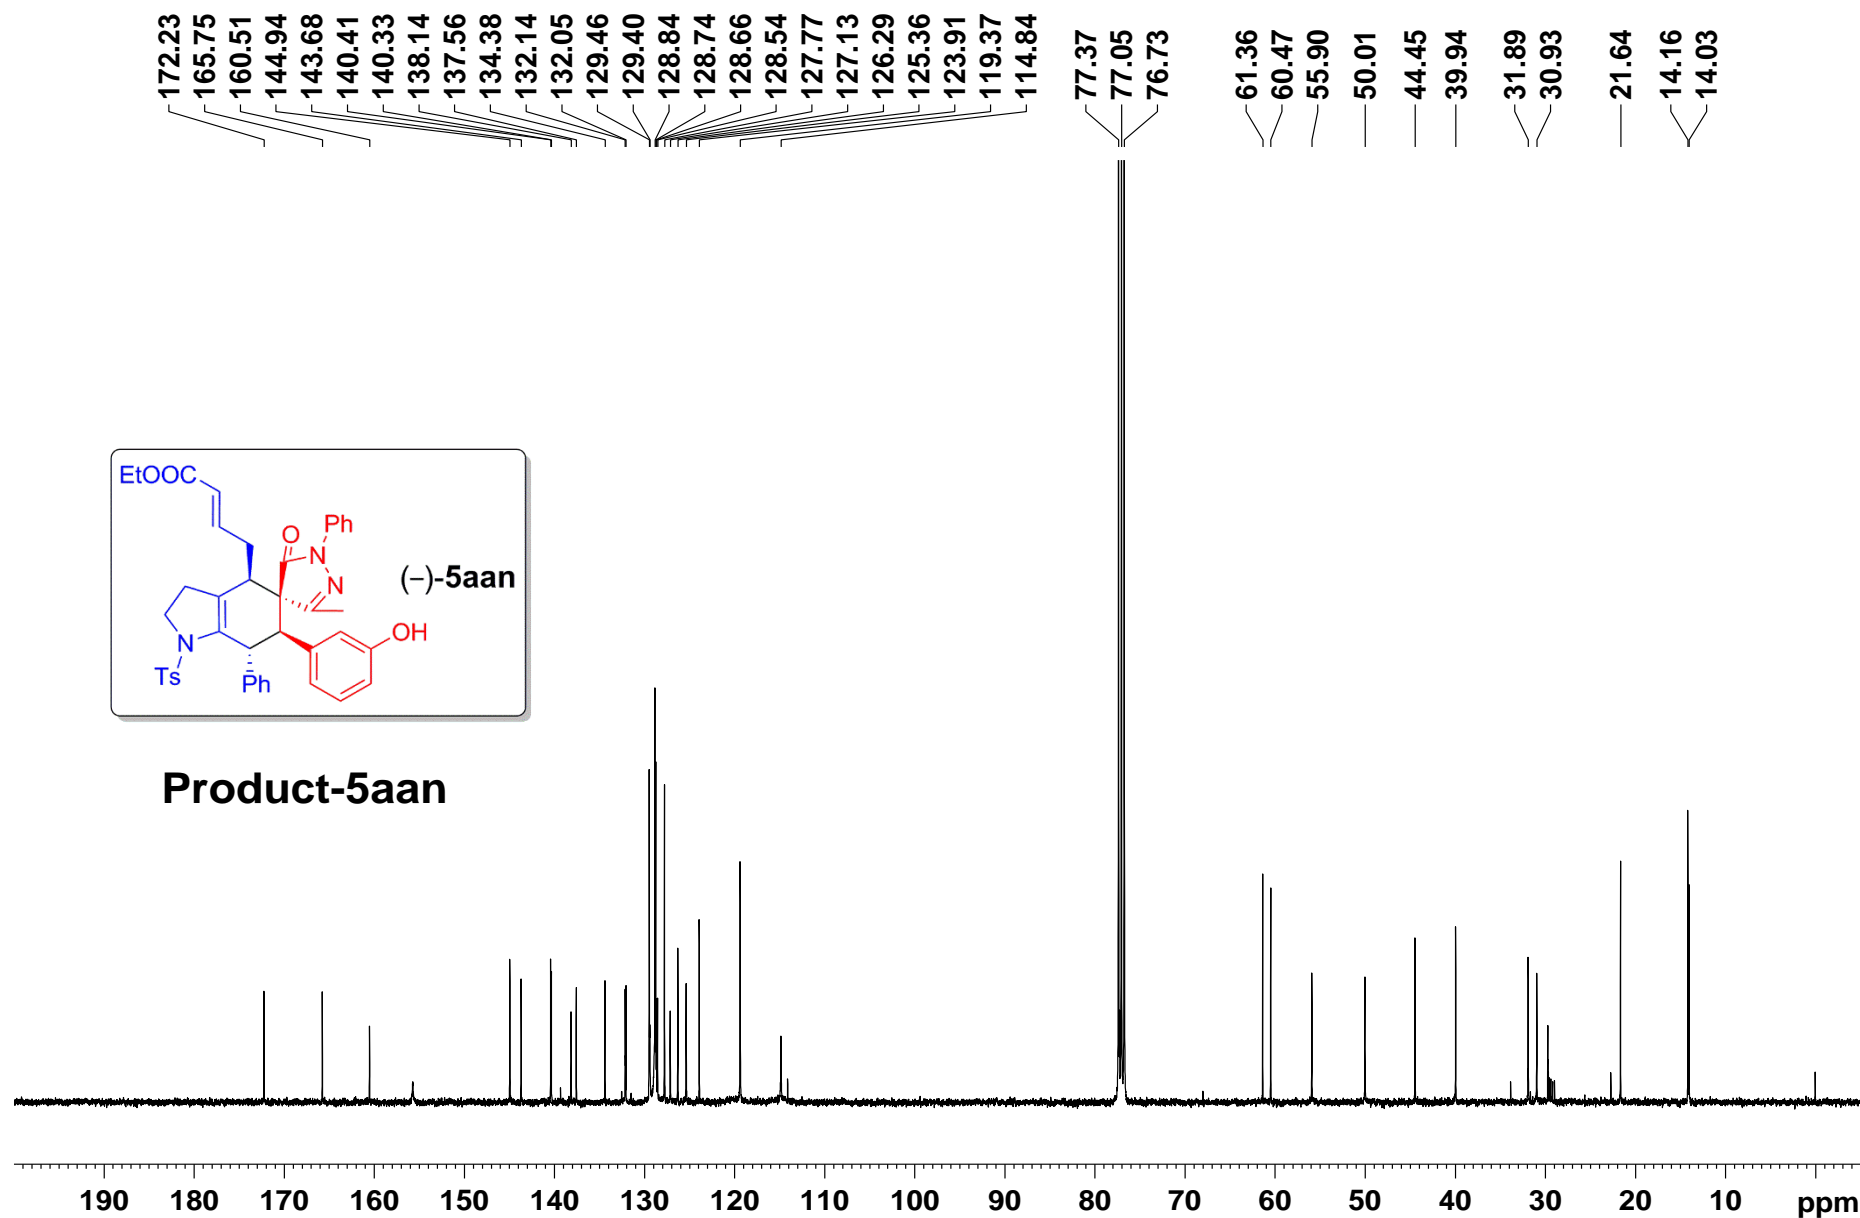

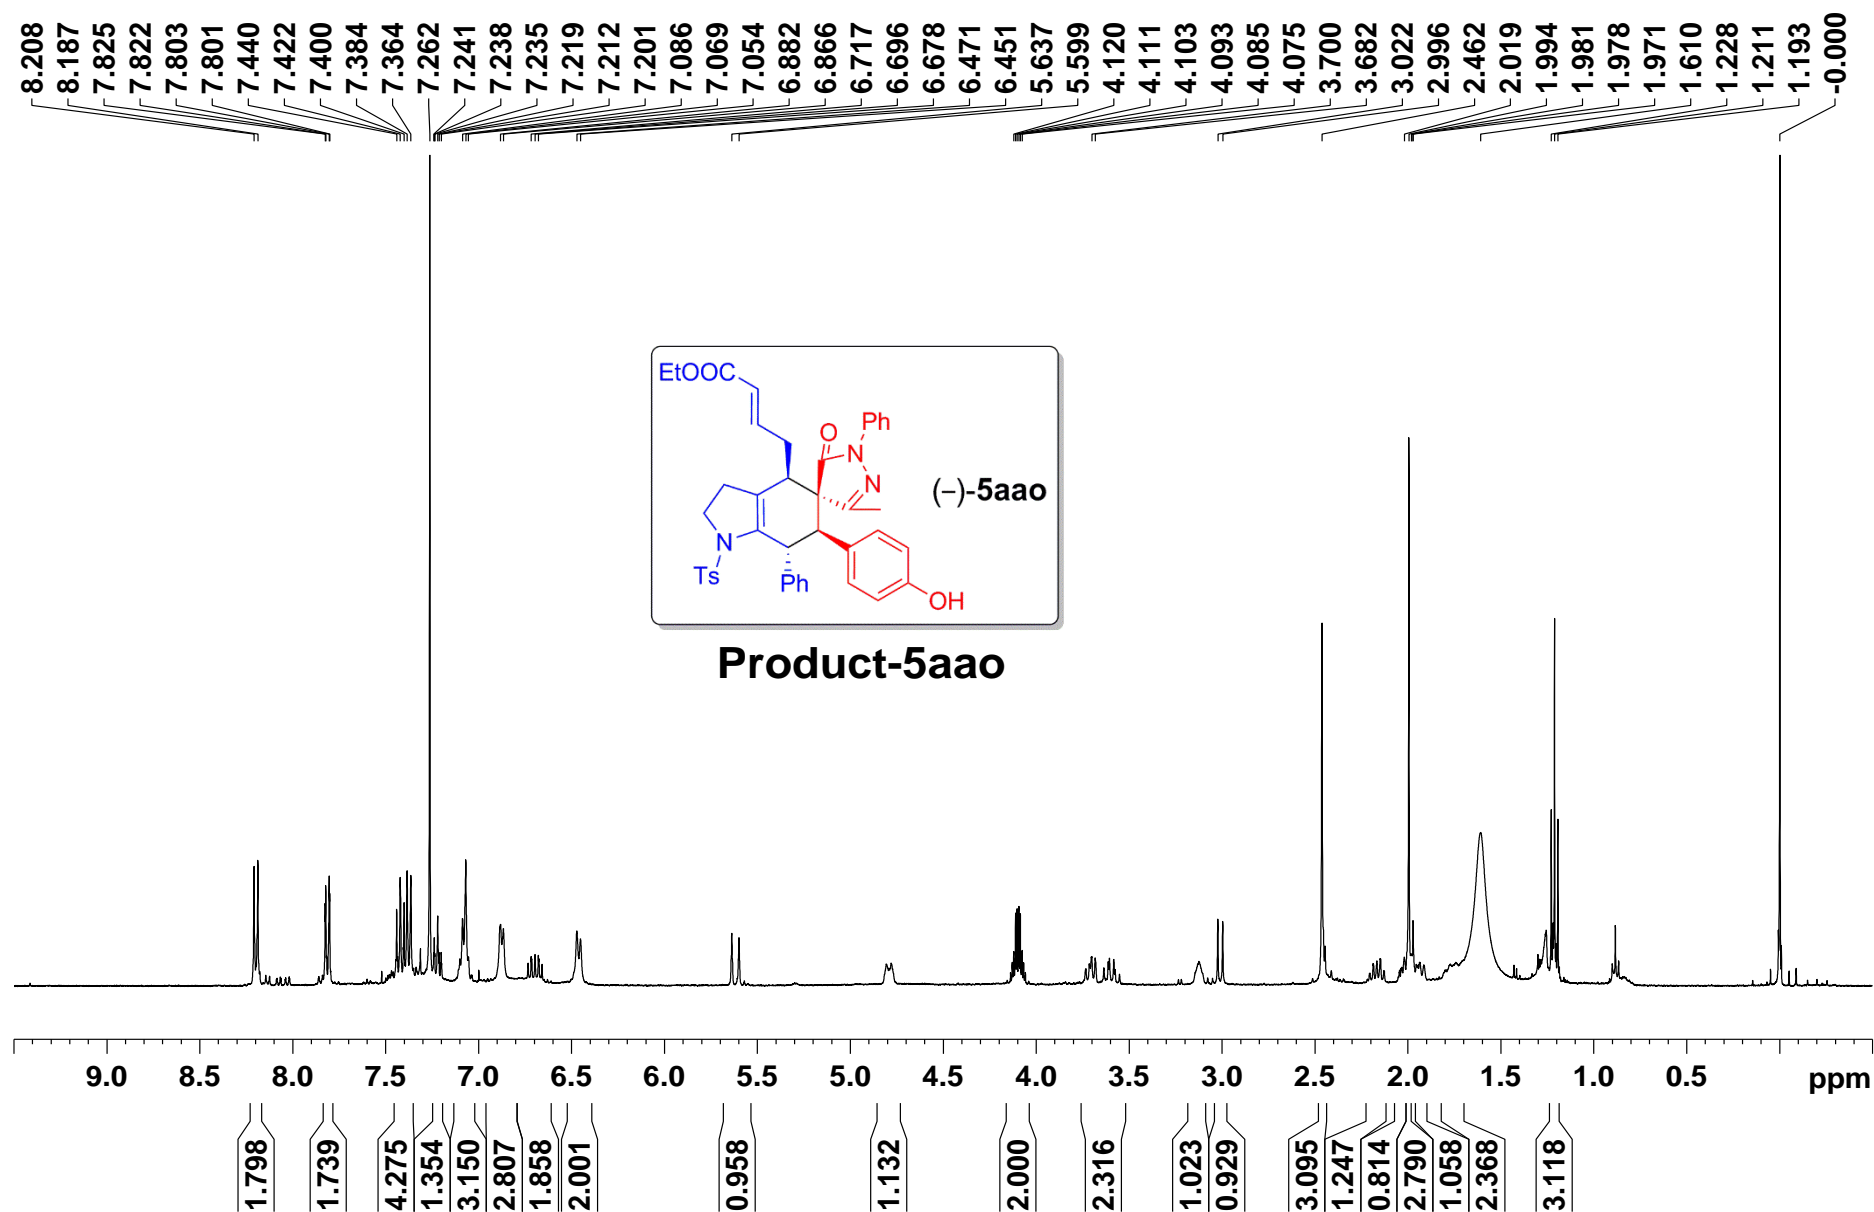



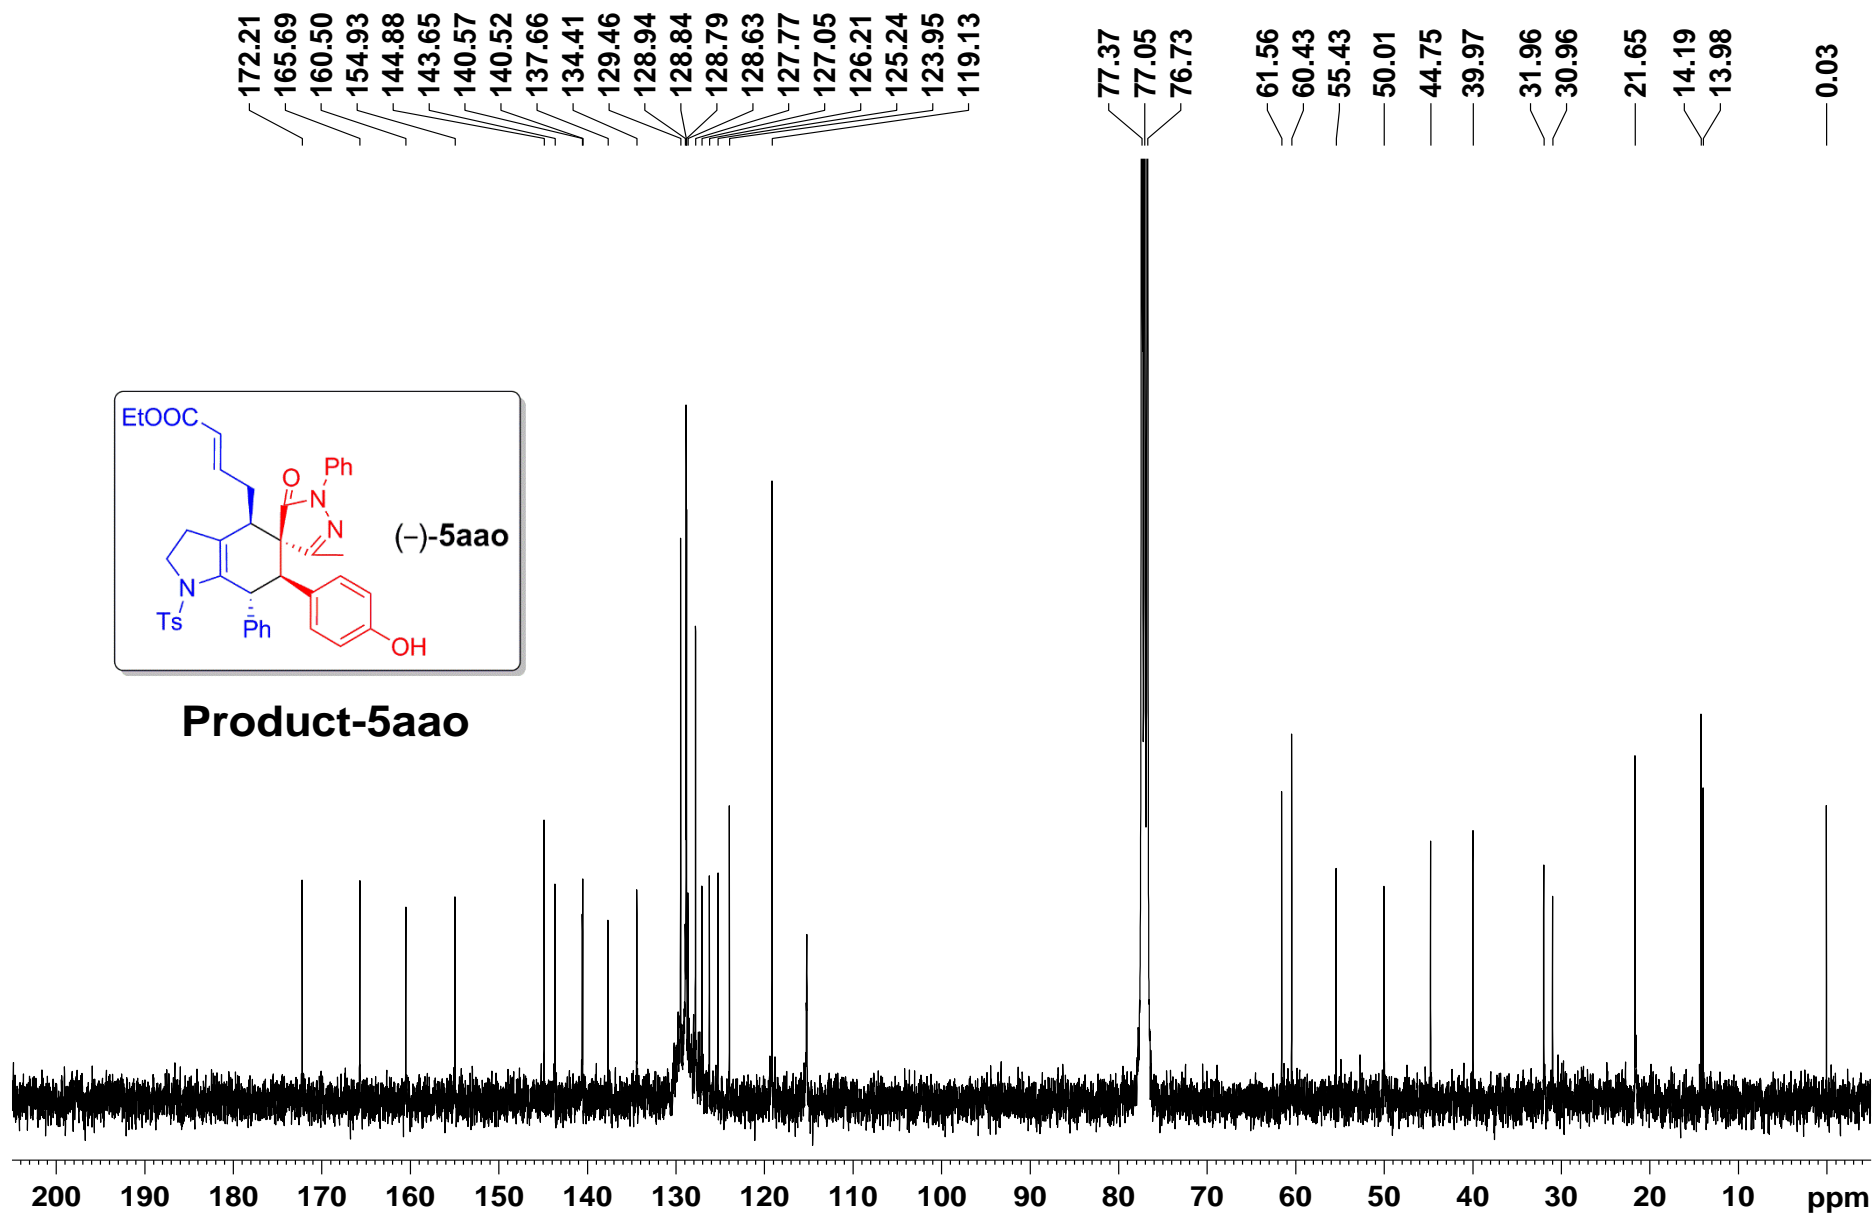

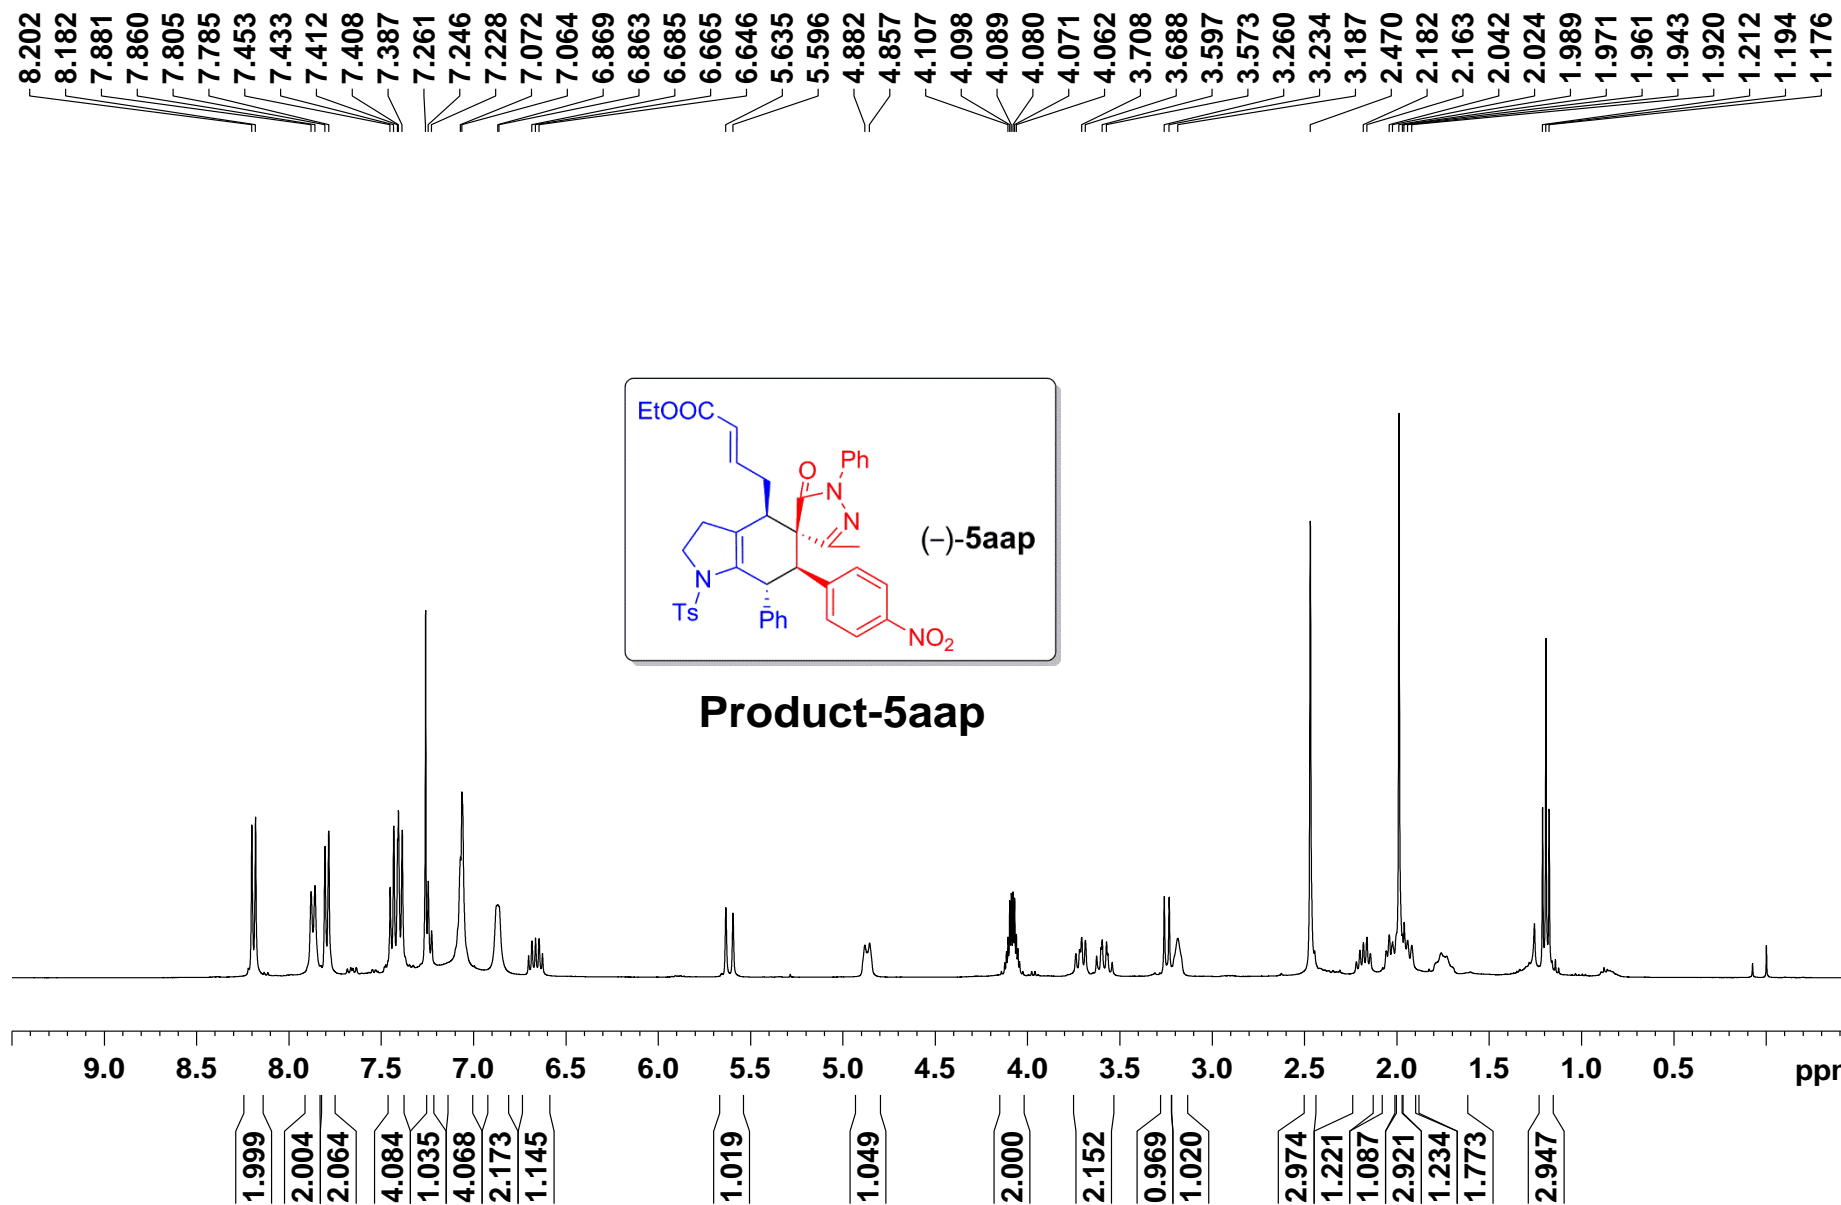

171.62  
165.49  
159.82  
147.33  
144.52  
144.18  
143.91  
139.92  
139.60  
137.29  
134.17  
129.55  
129.00  
128.74  
128.11  
127.52  
126.71  
125.63  
124.25  
123.48  
118.89

77.39  
77.07  
76.75

61.05  
60.43  
55.87

50.07  
44.40  
39.90

31.81  
30.88

21.64

14.16  
13.97

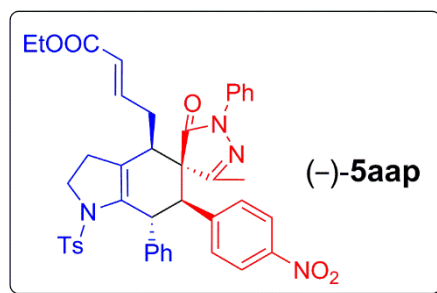

**Product-5aap**

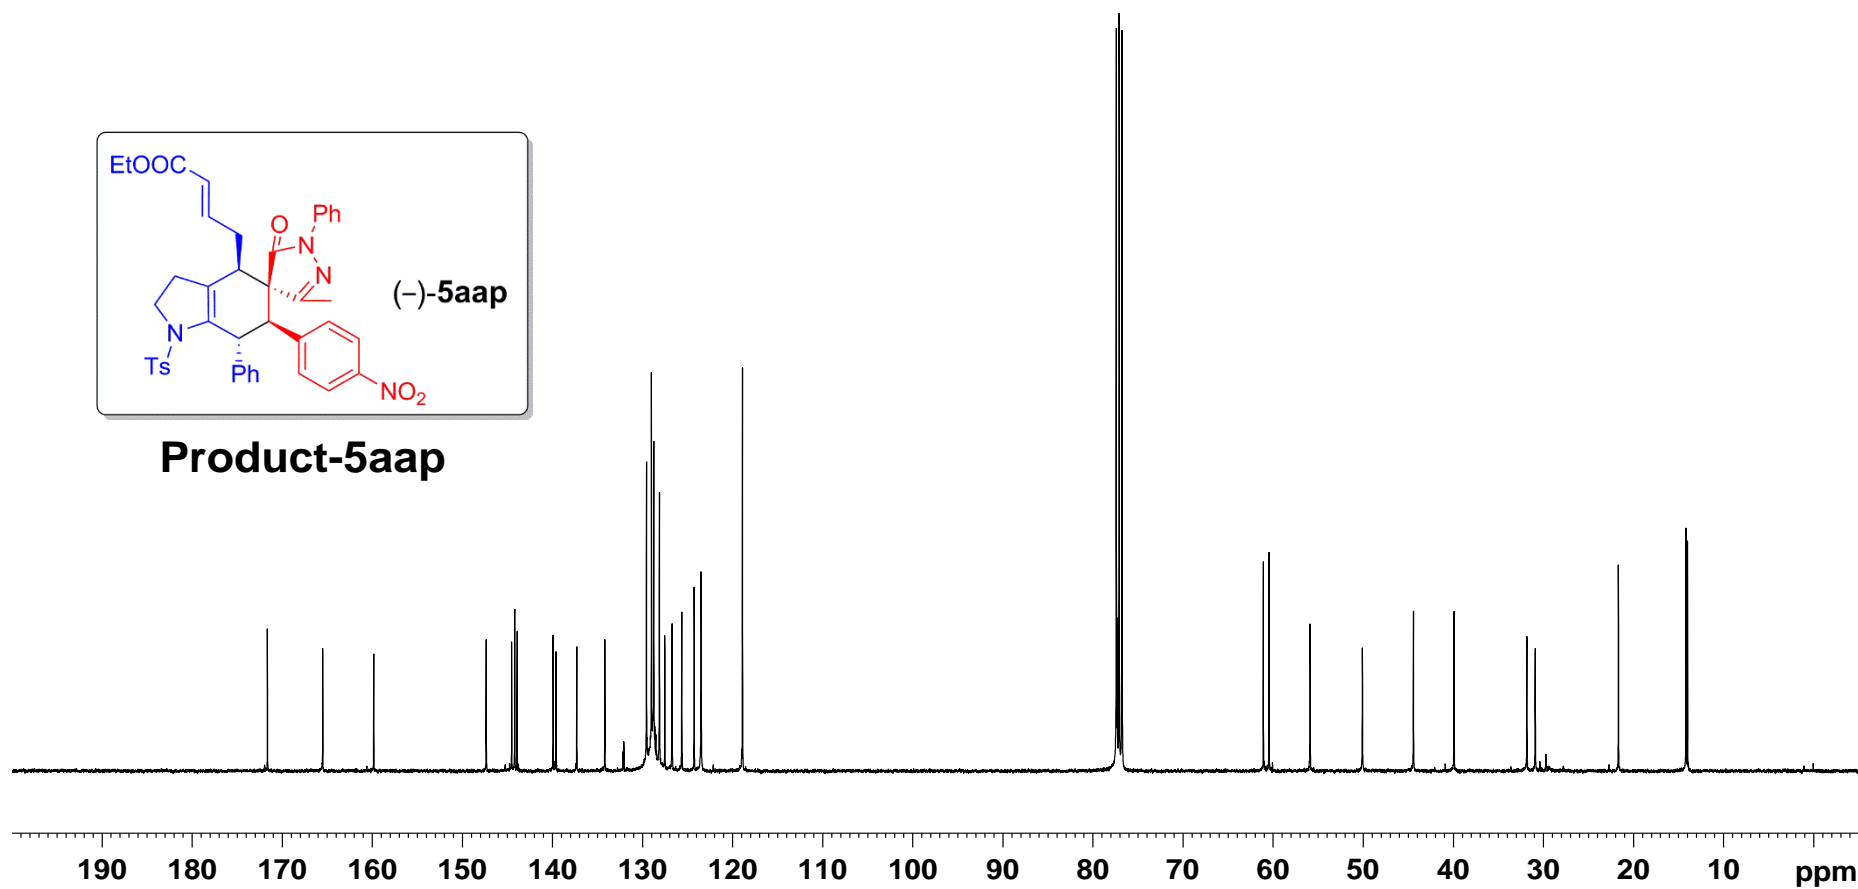

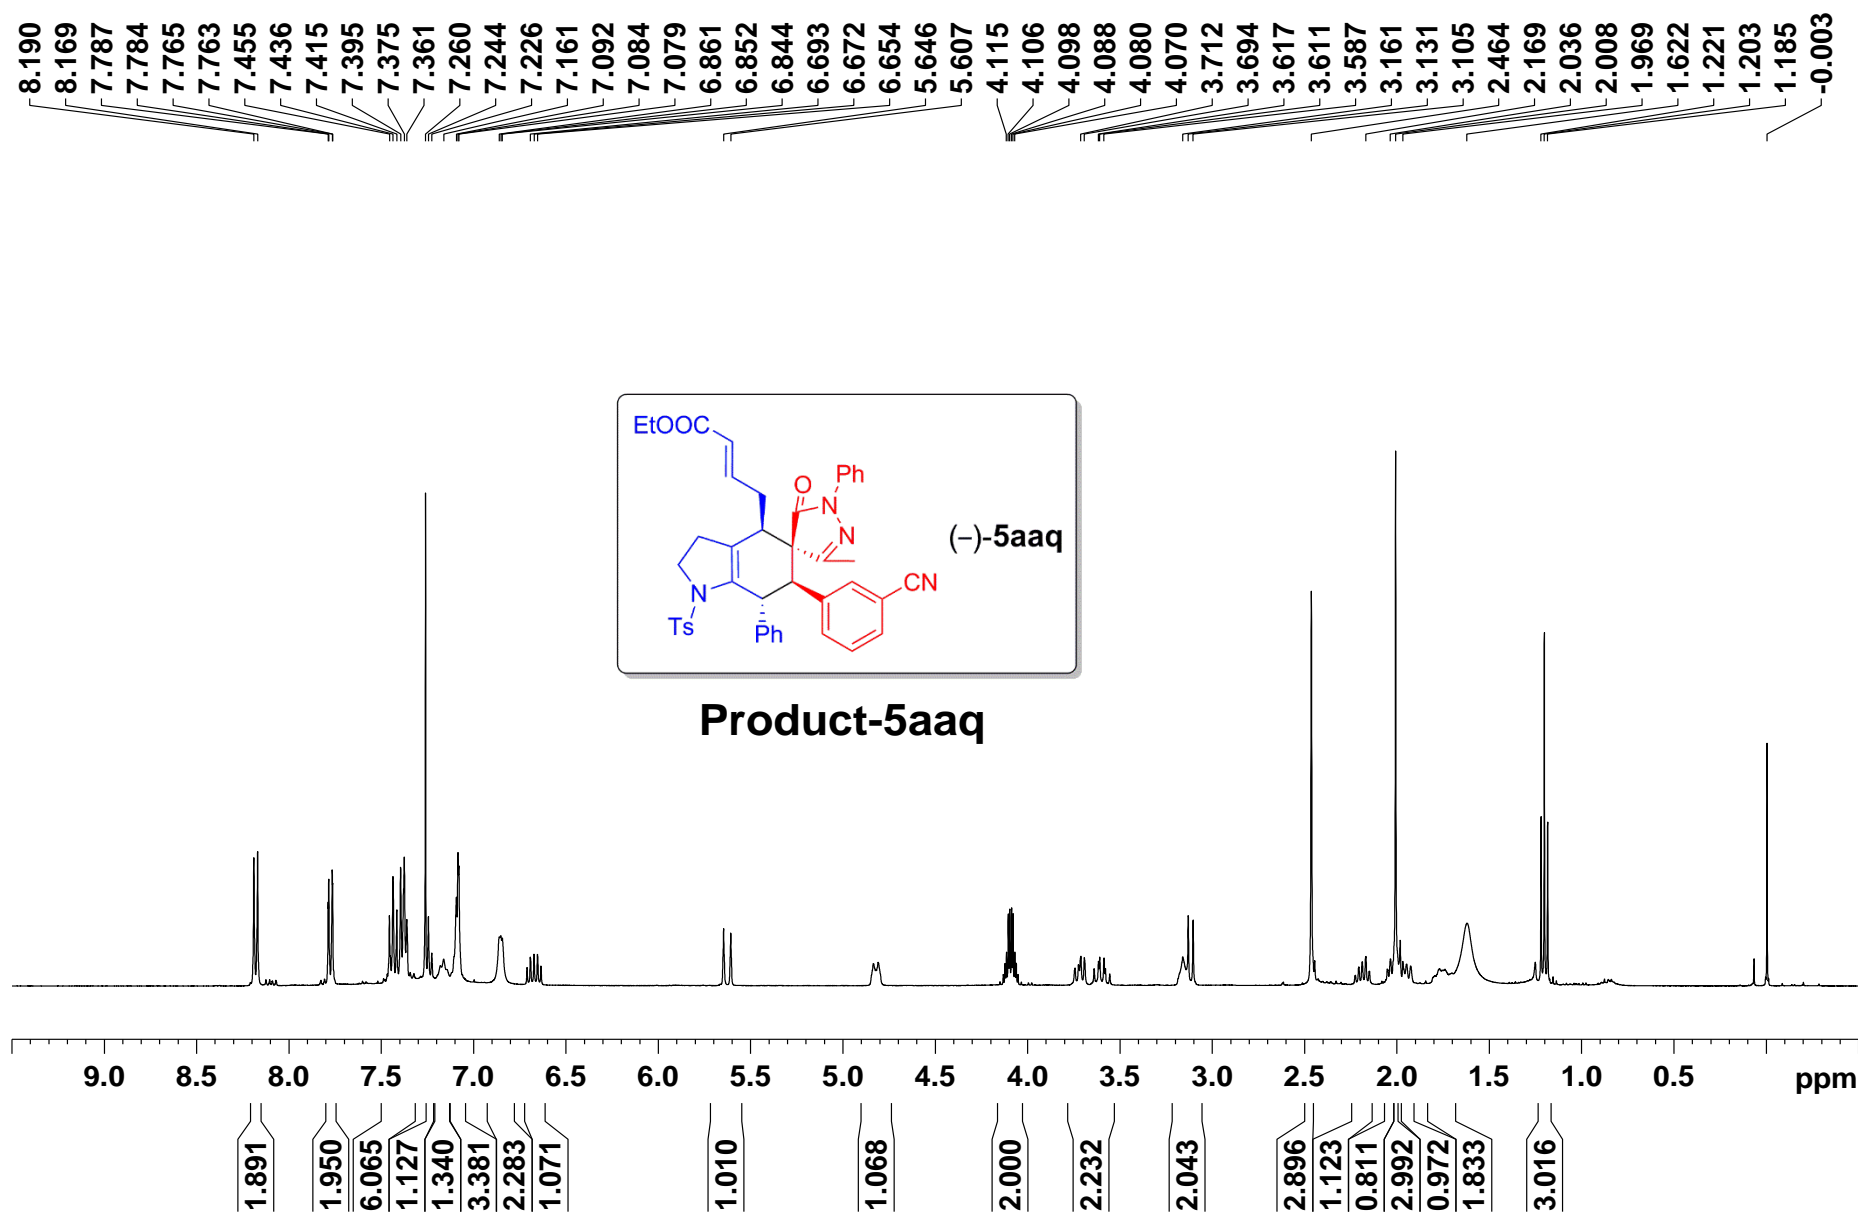

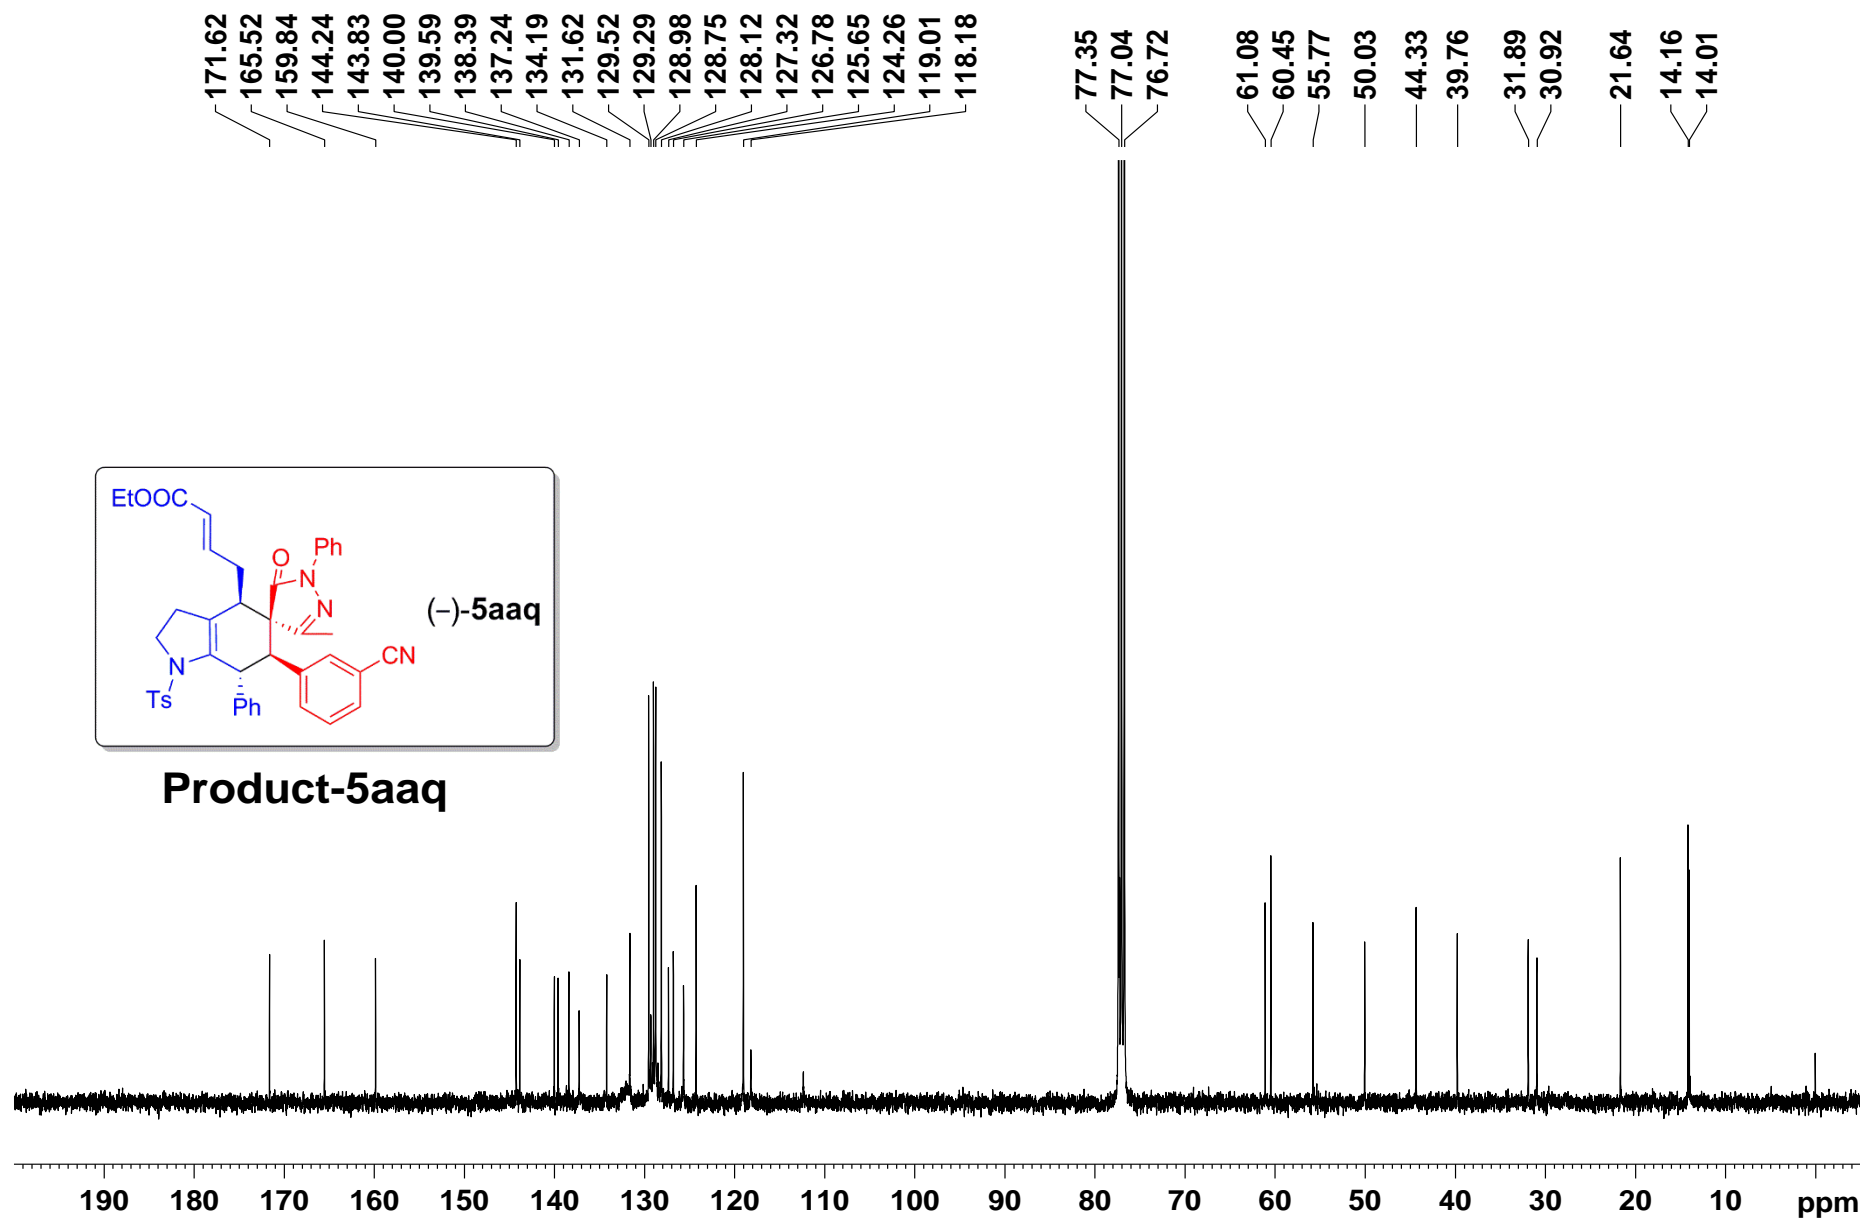



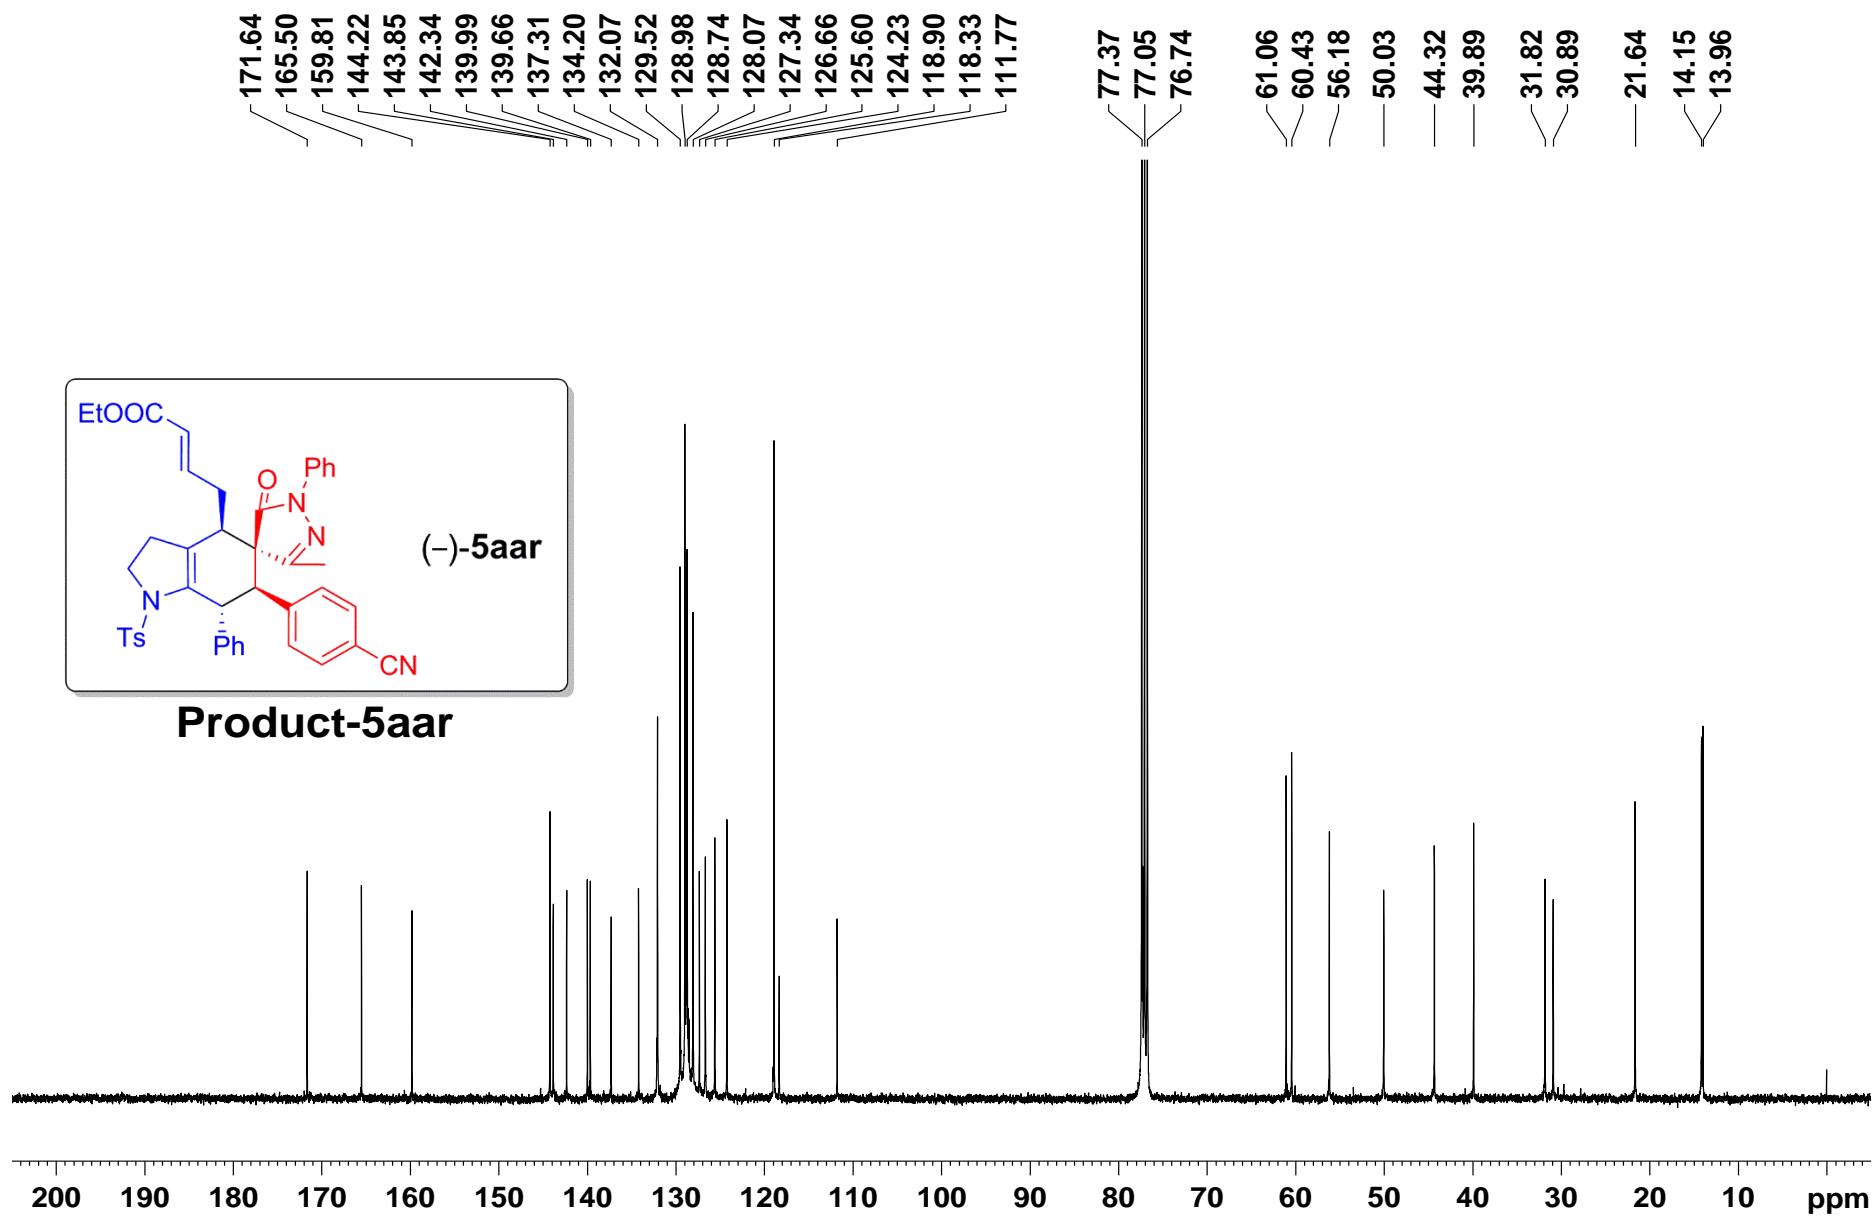





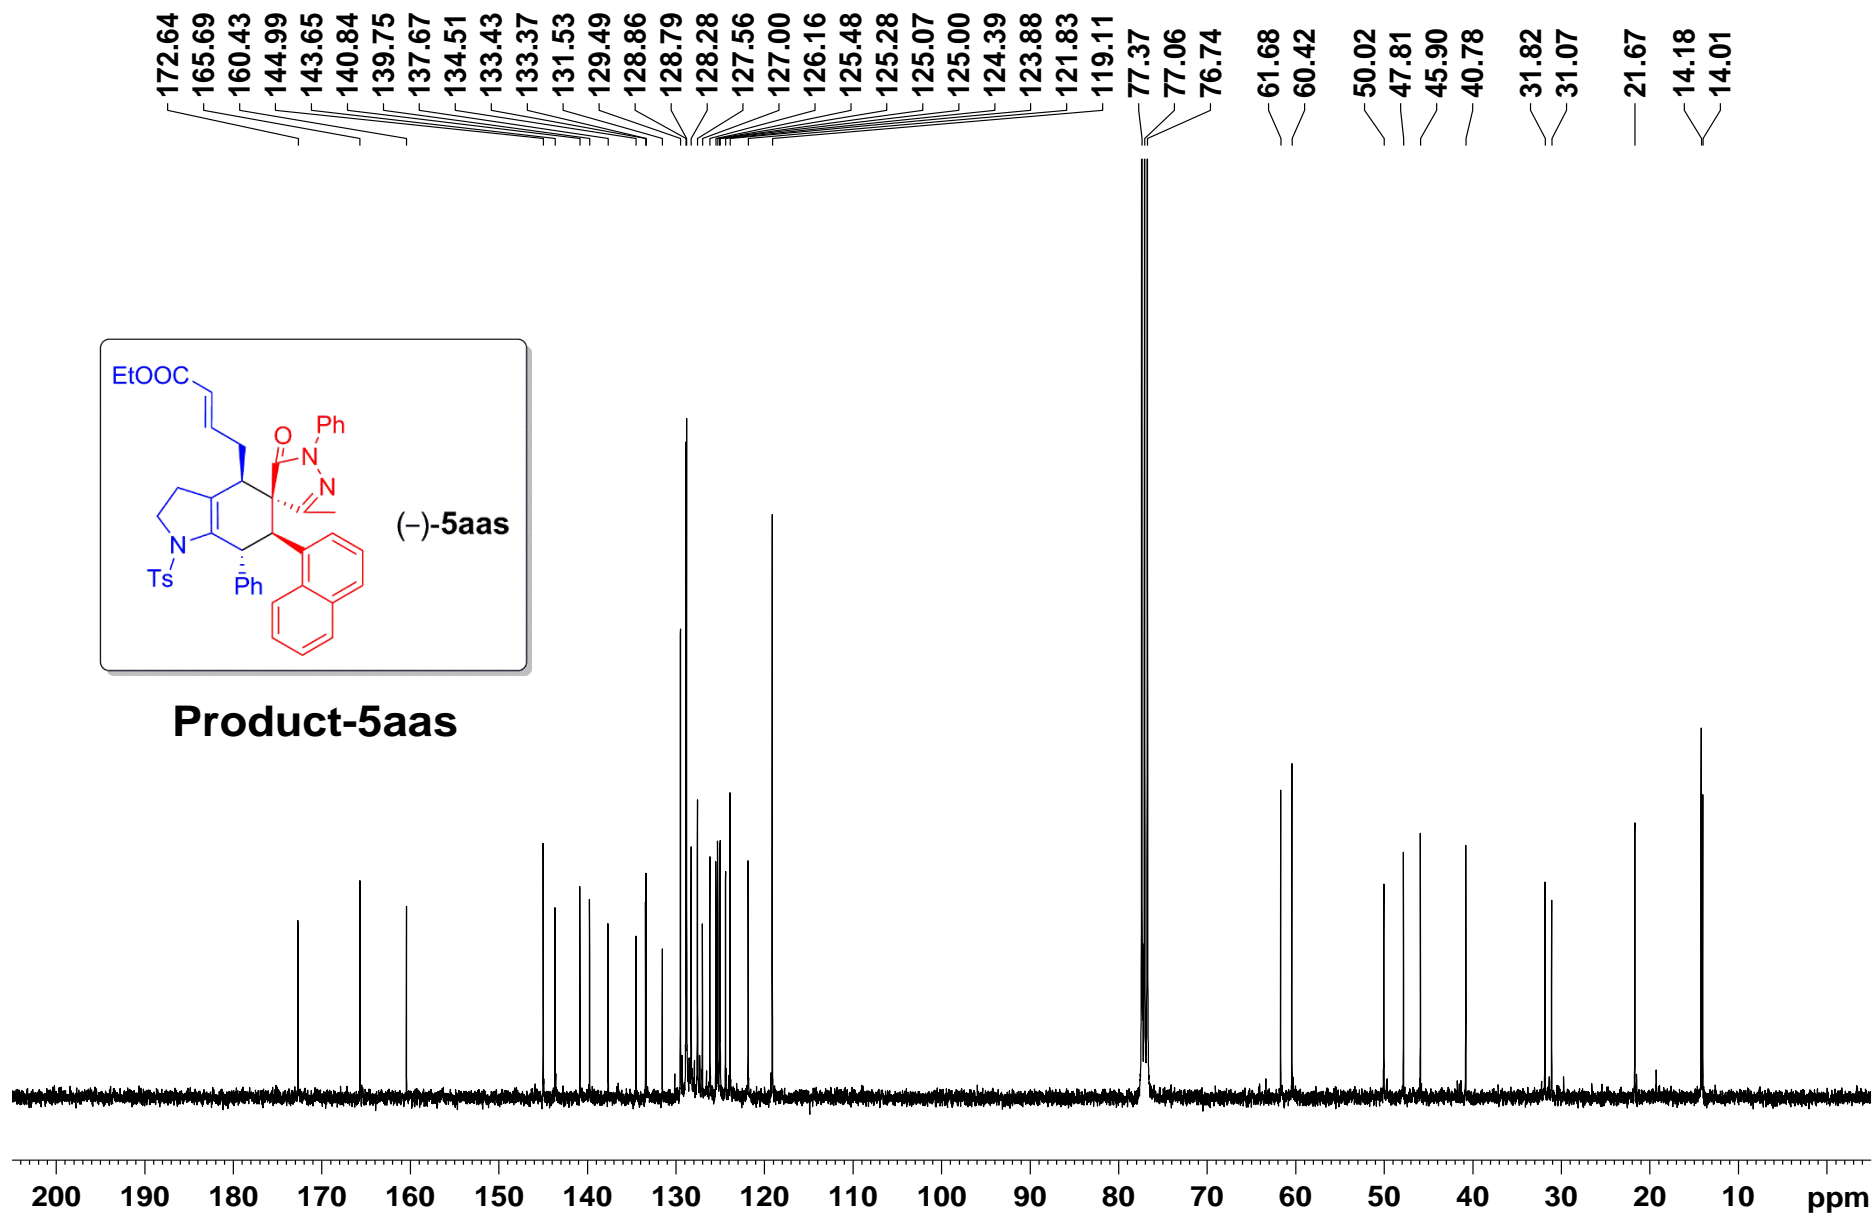

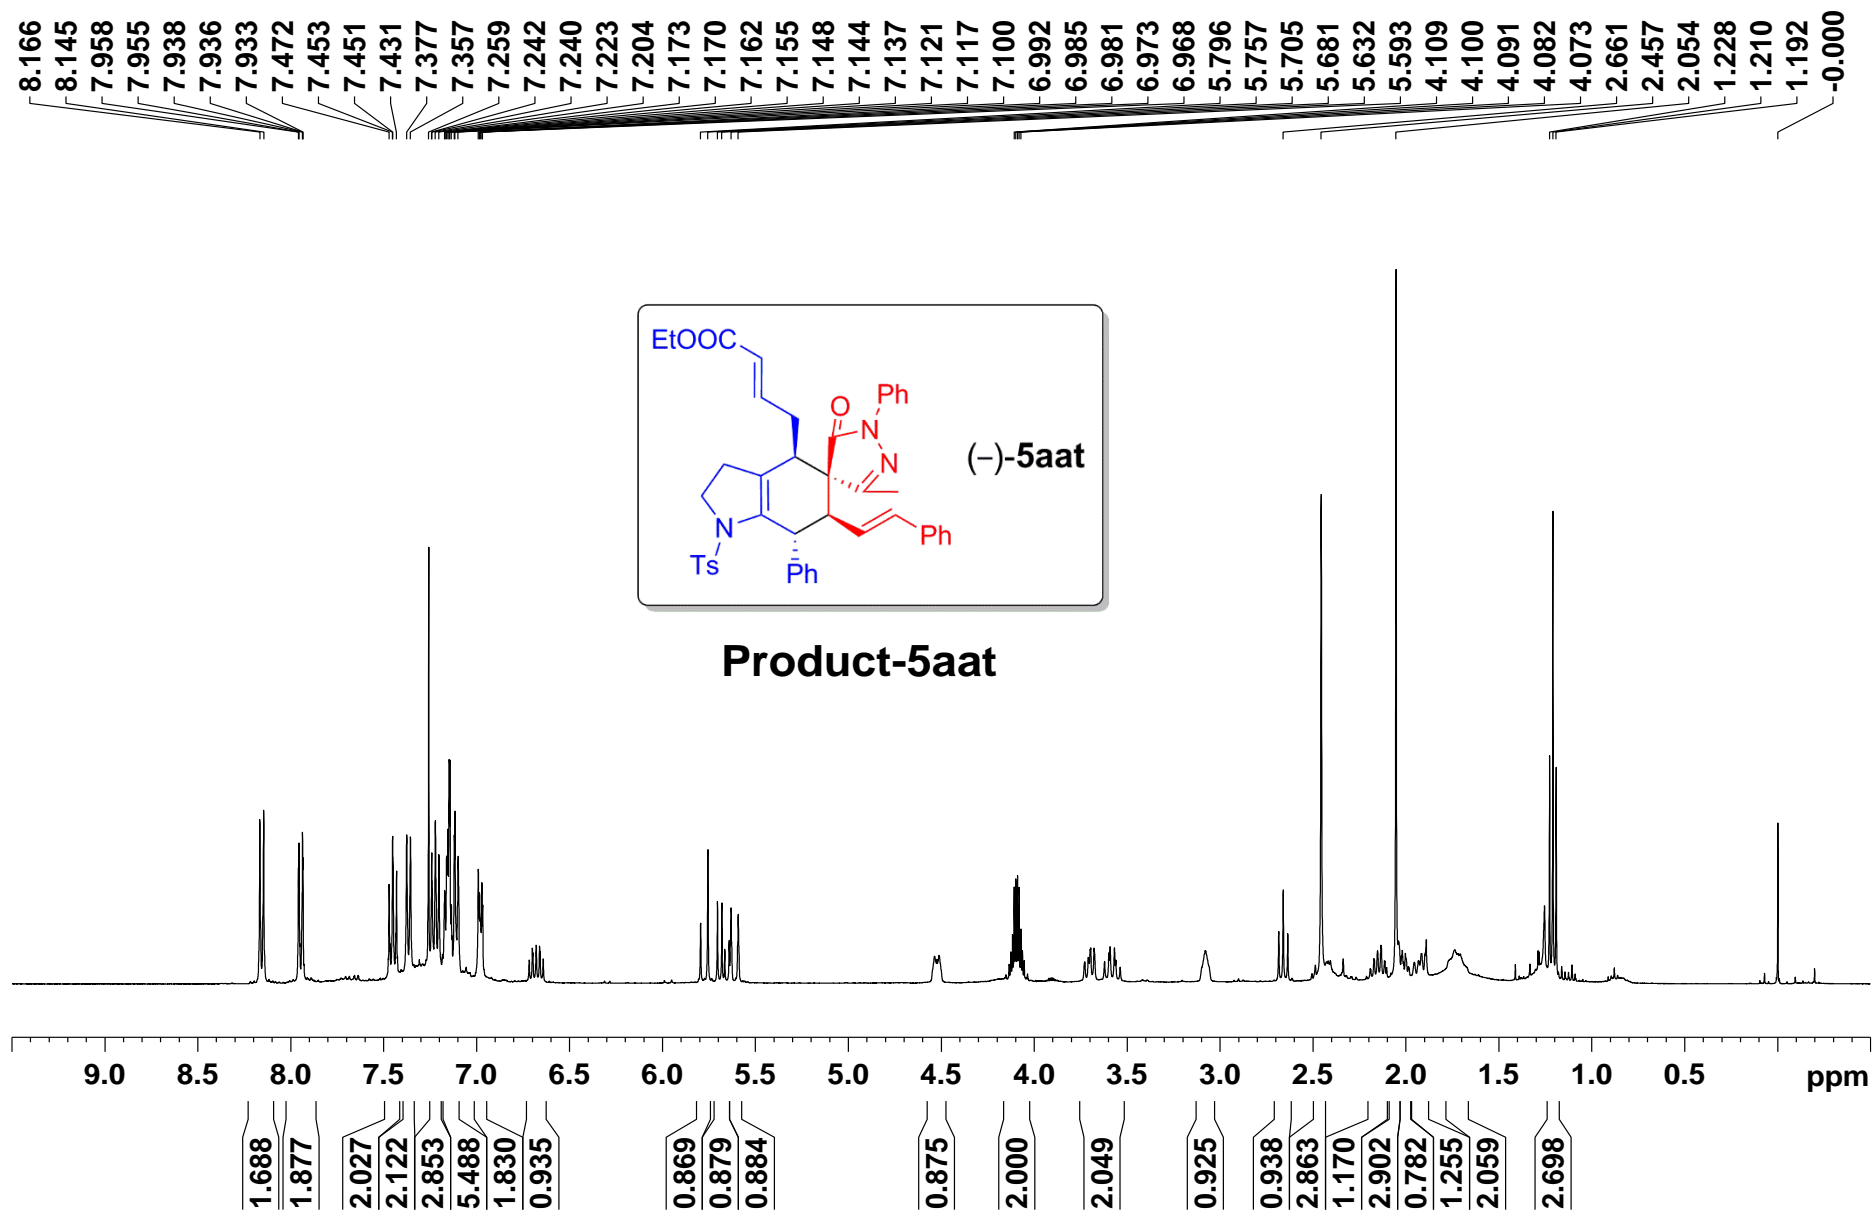

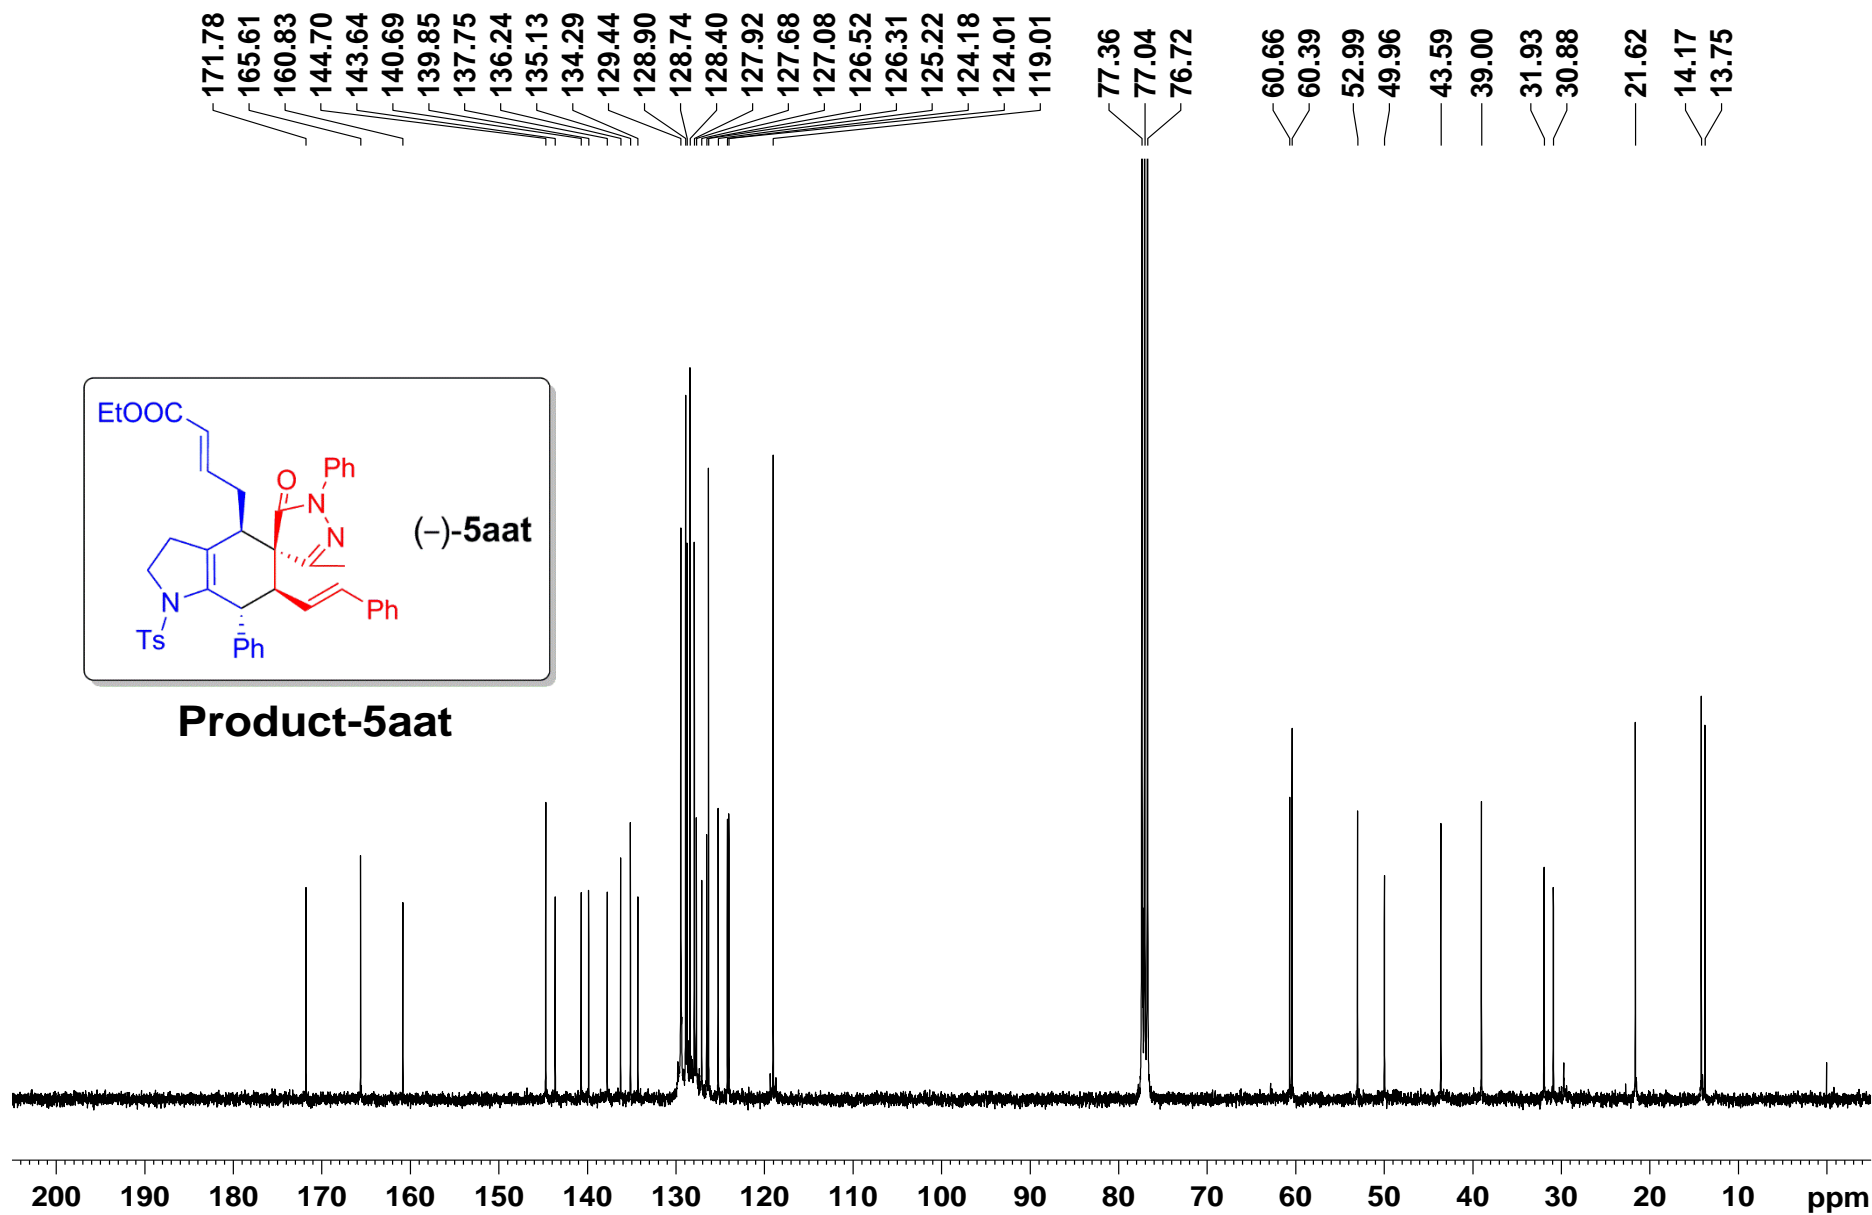

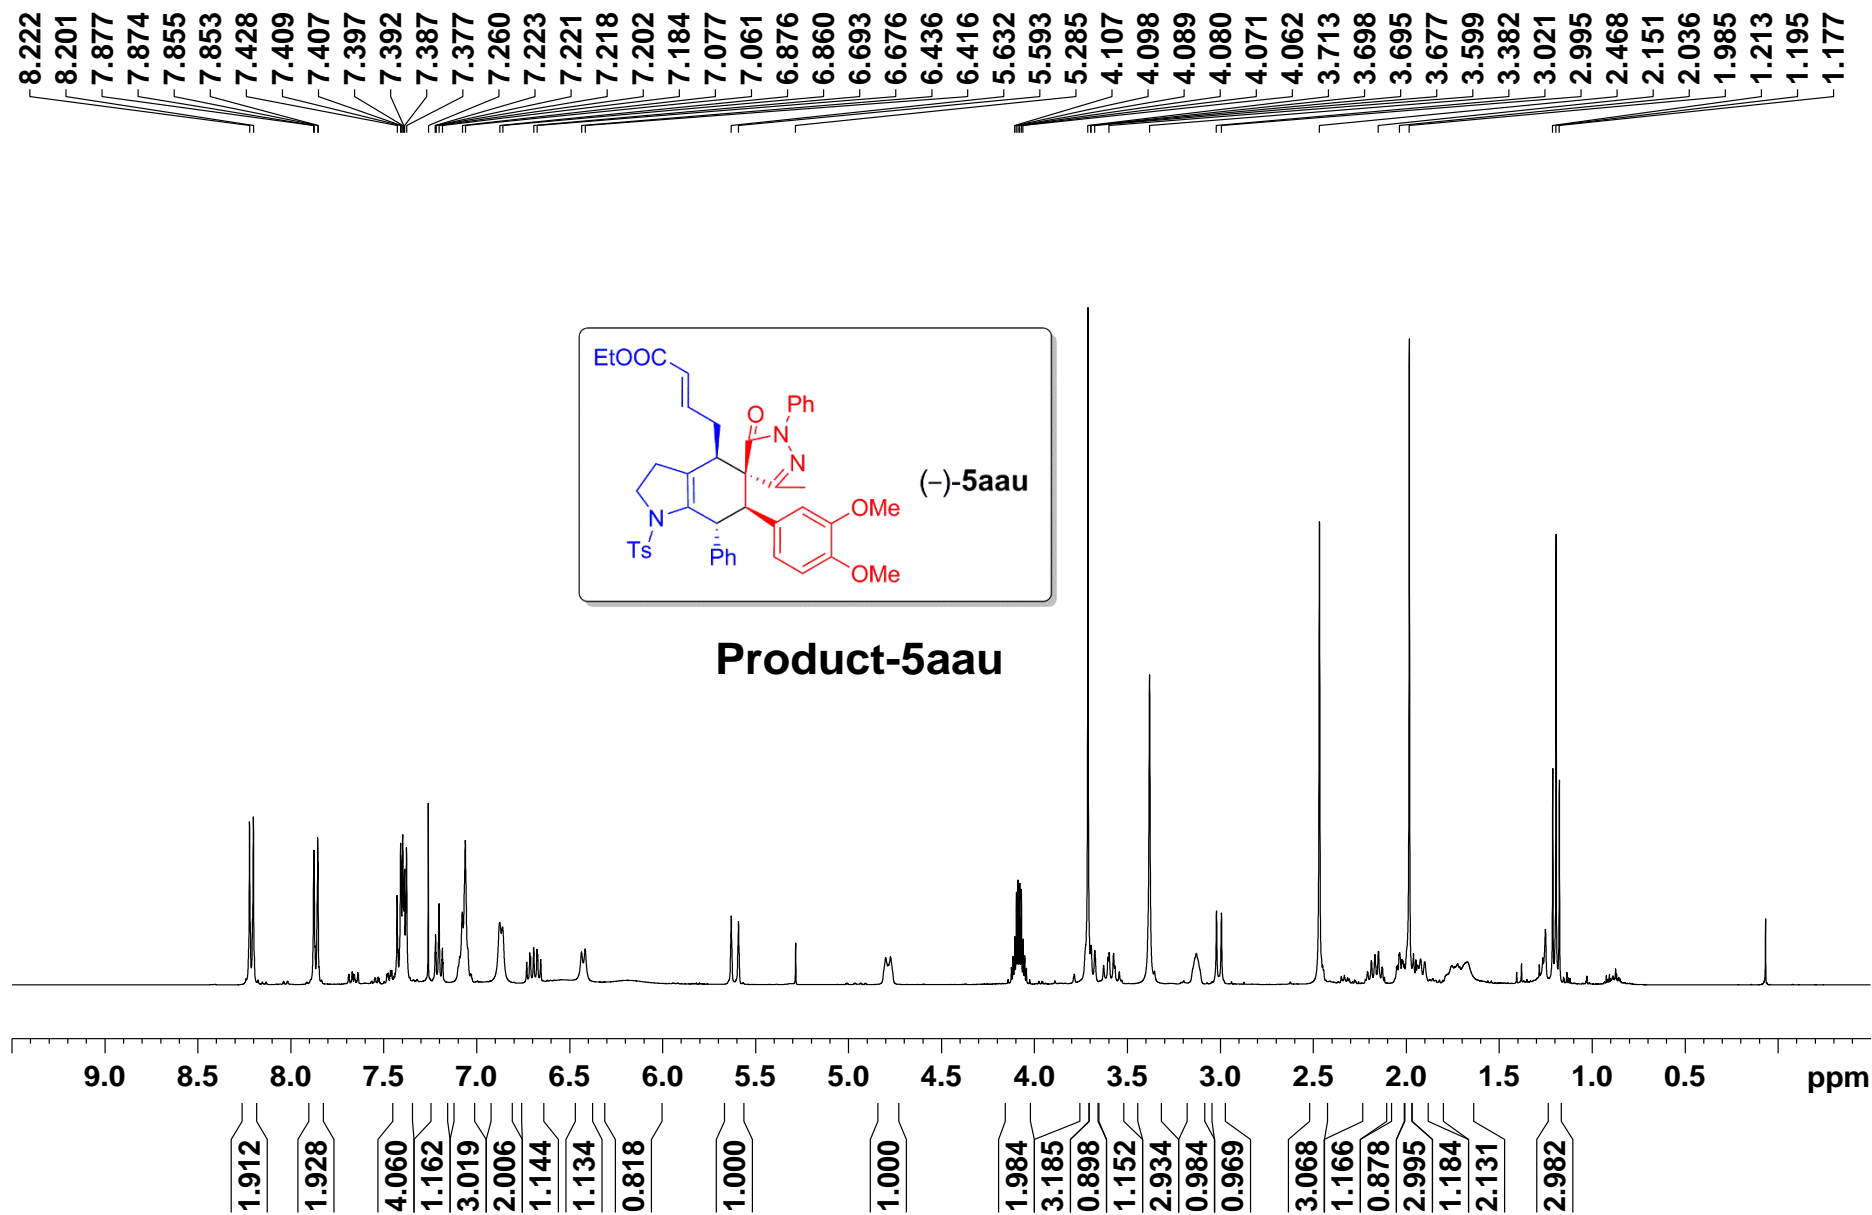

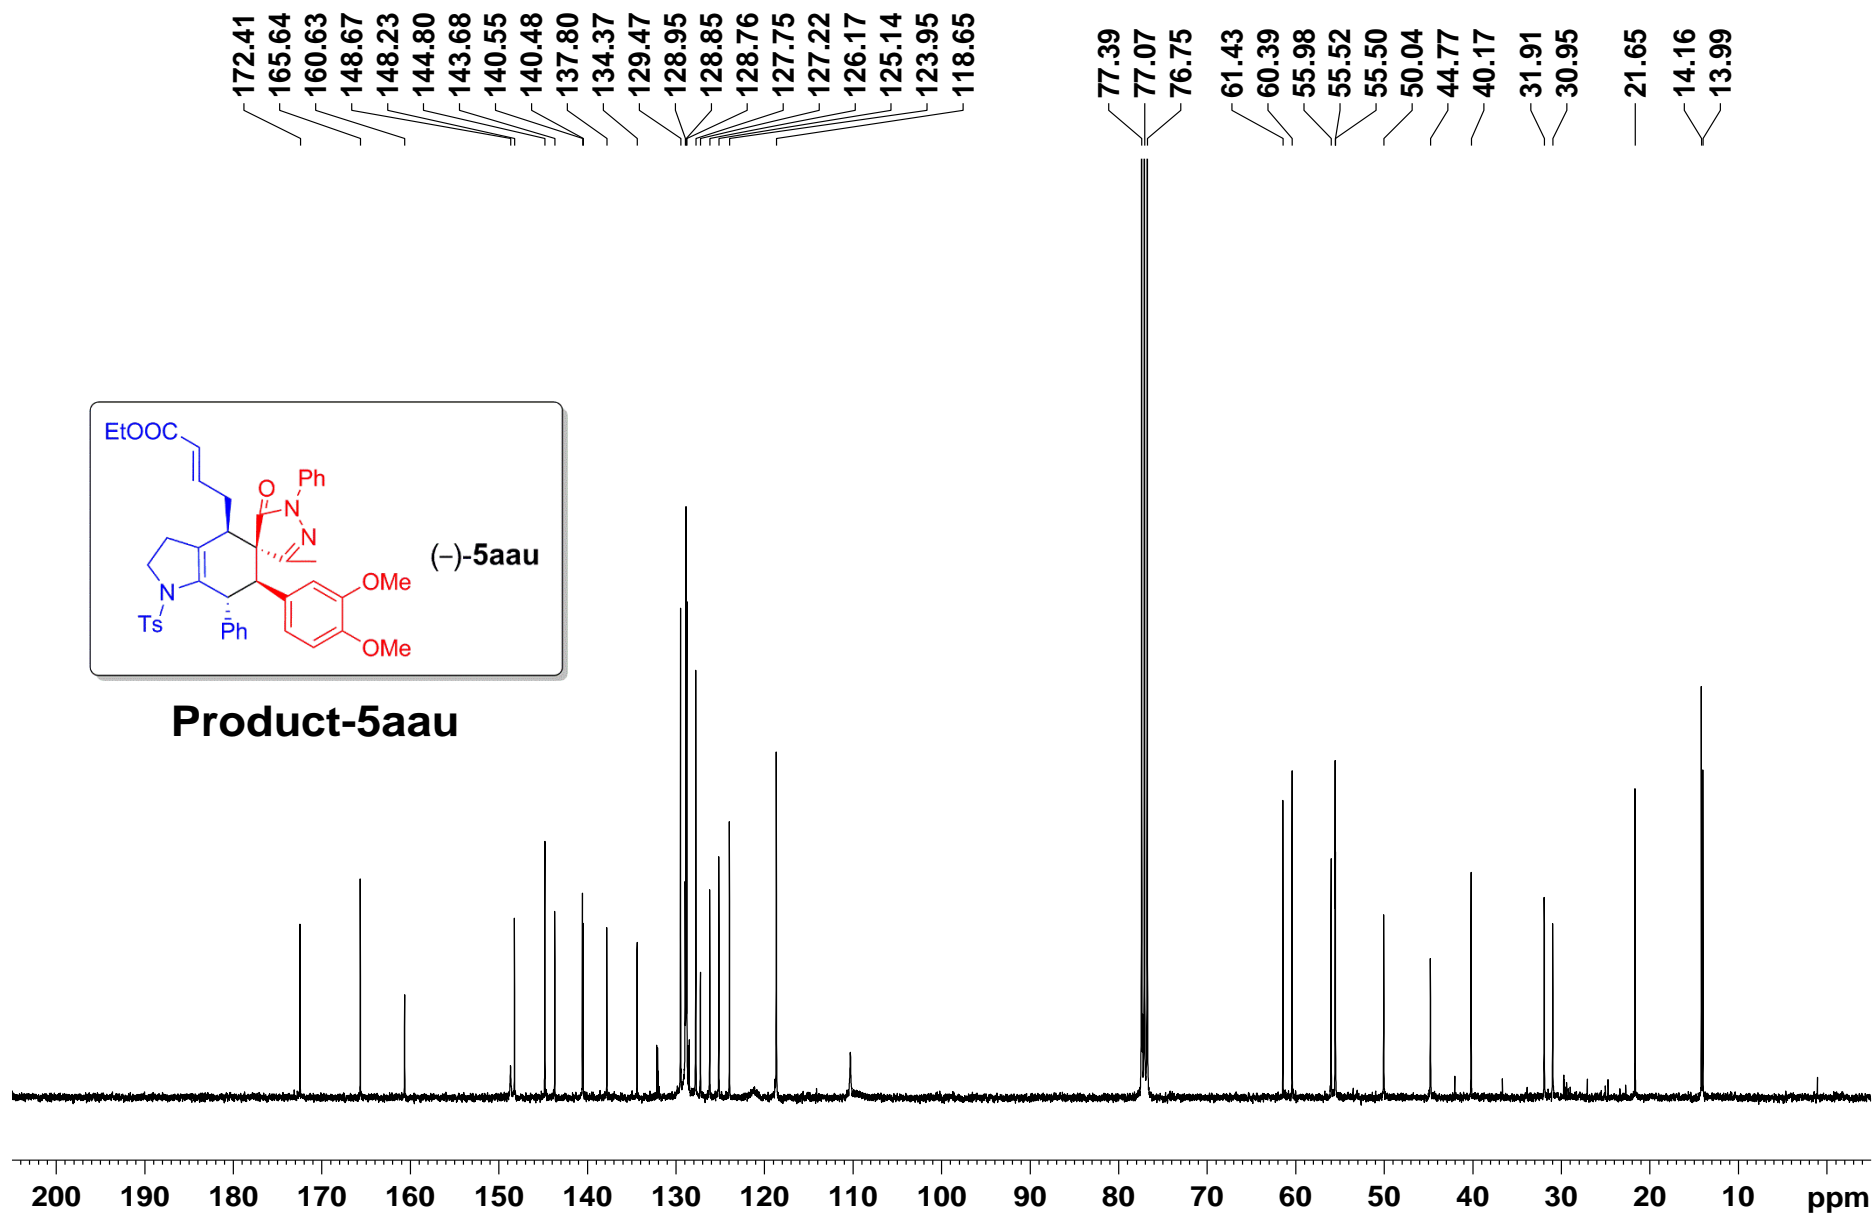

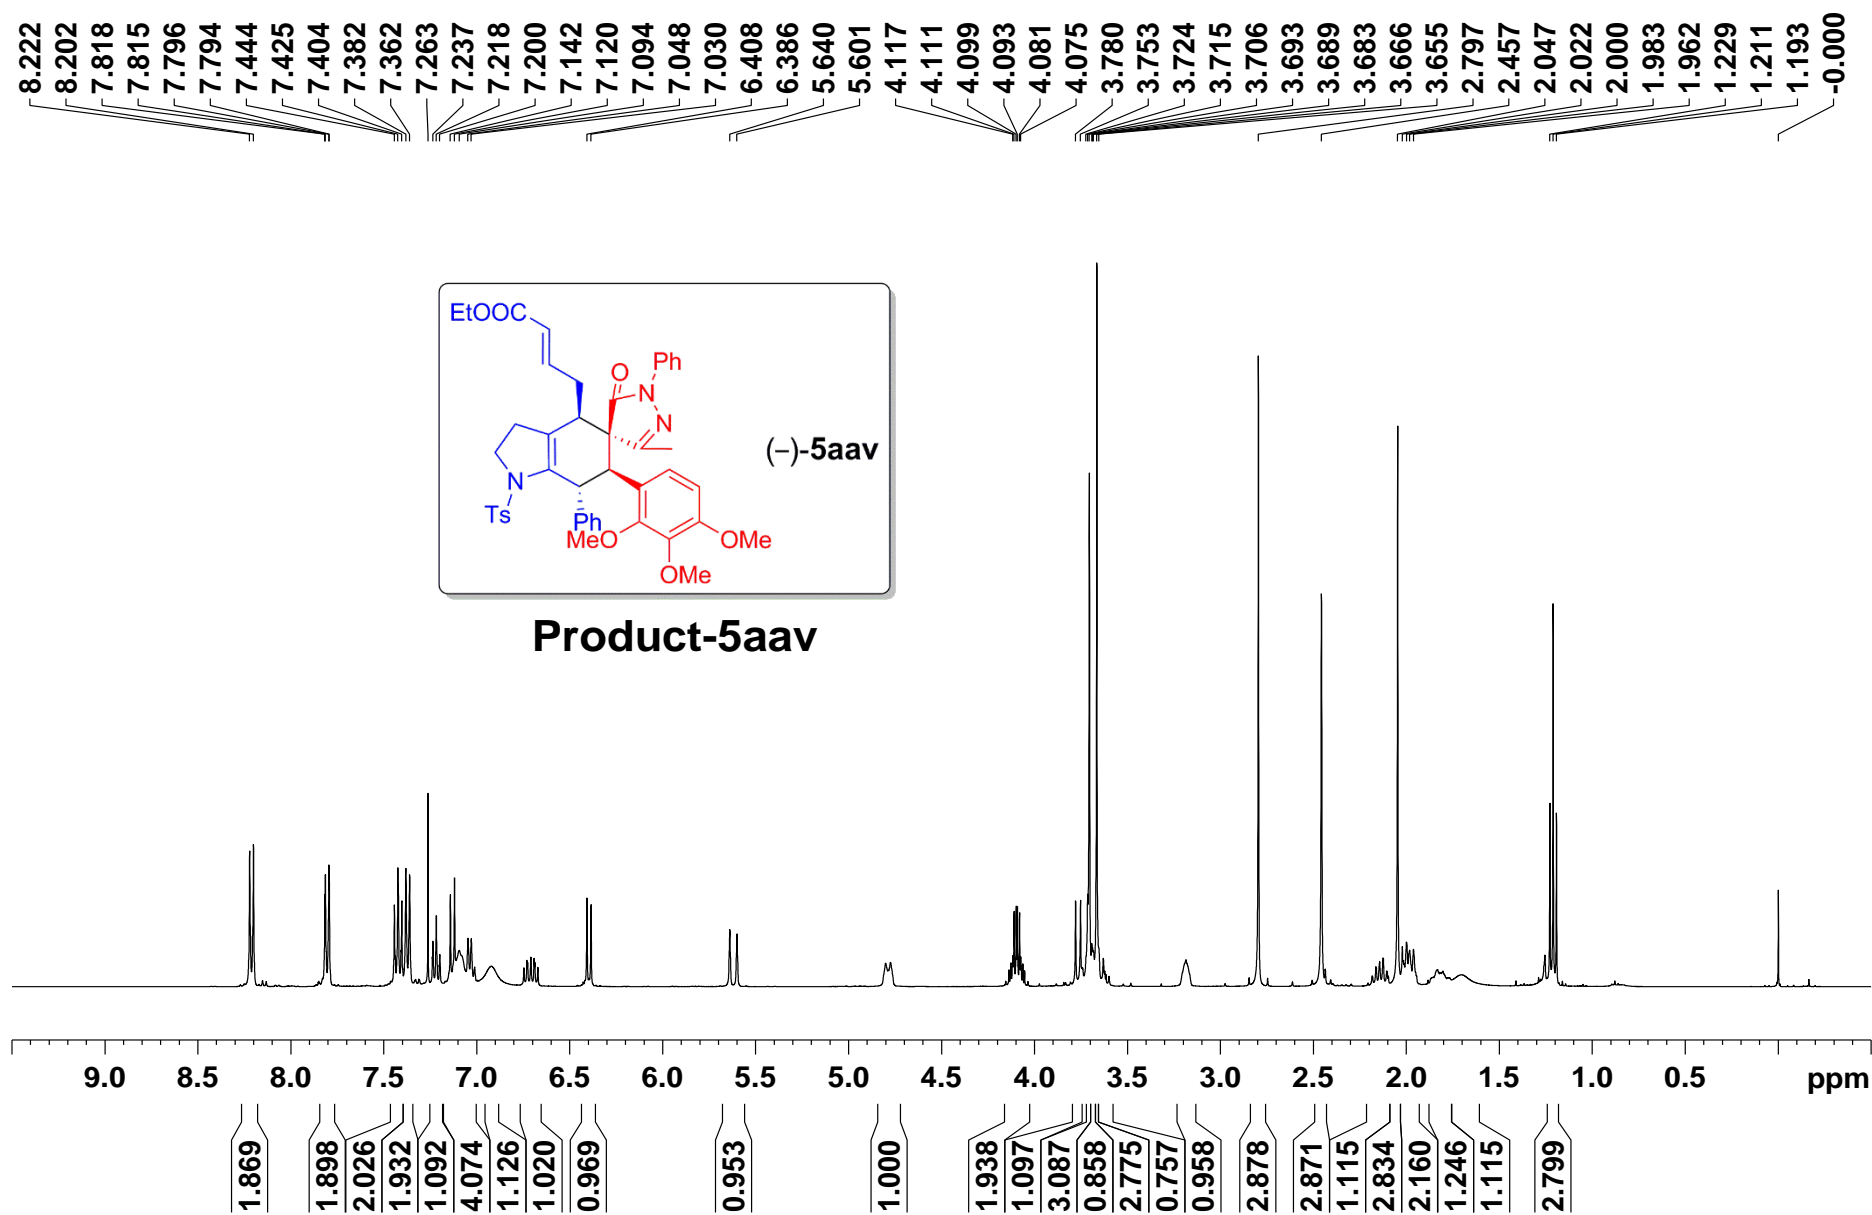

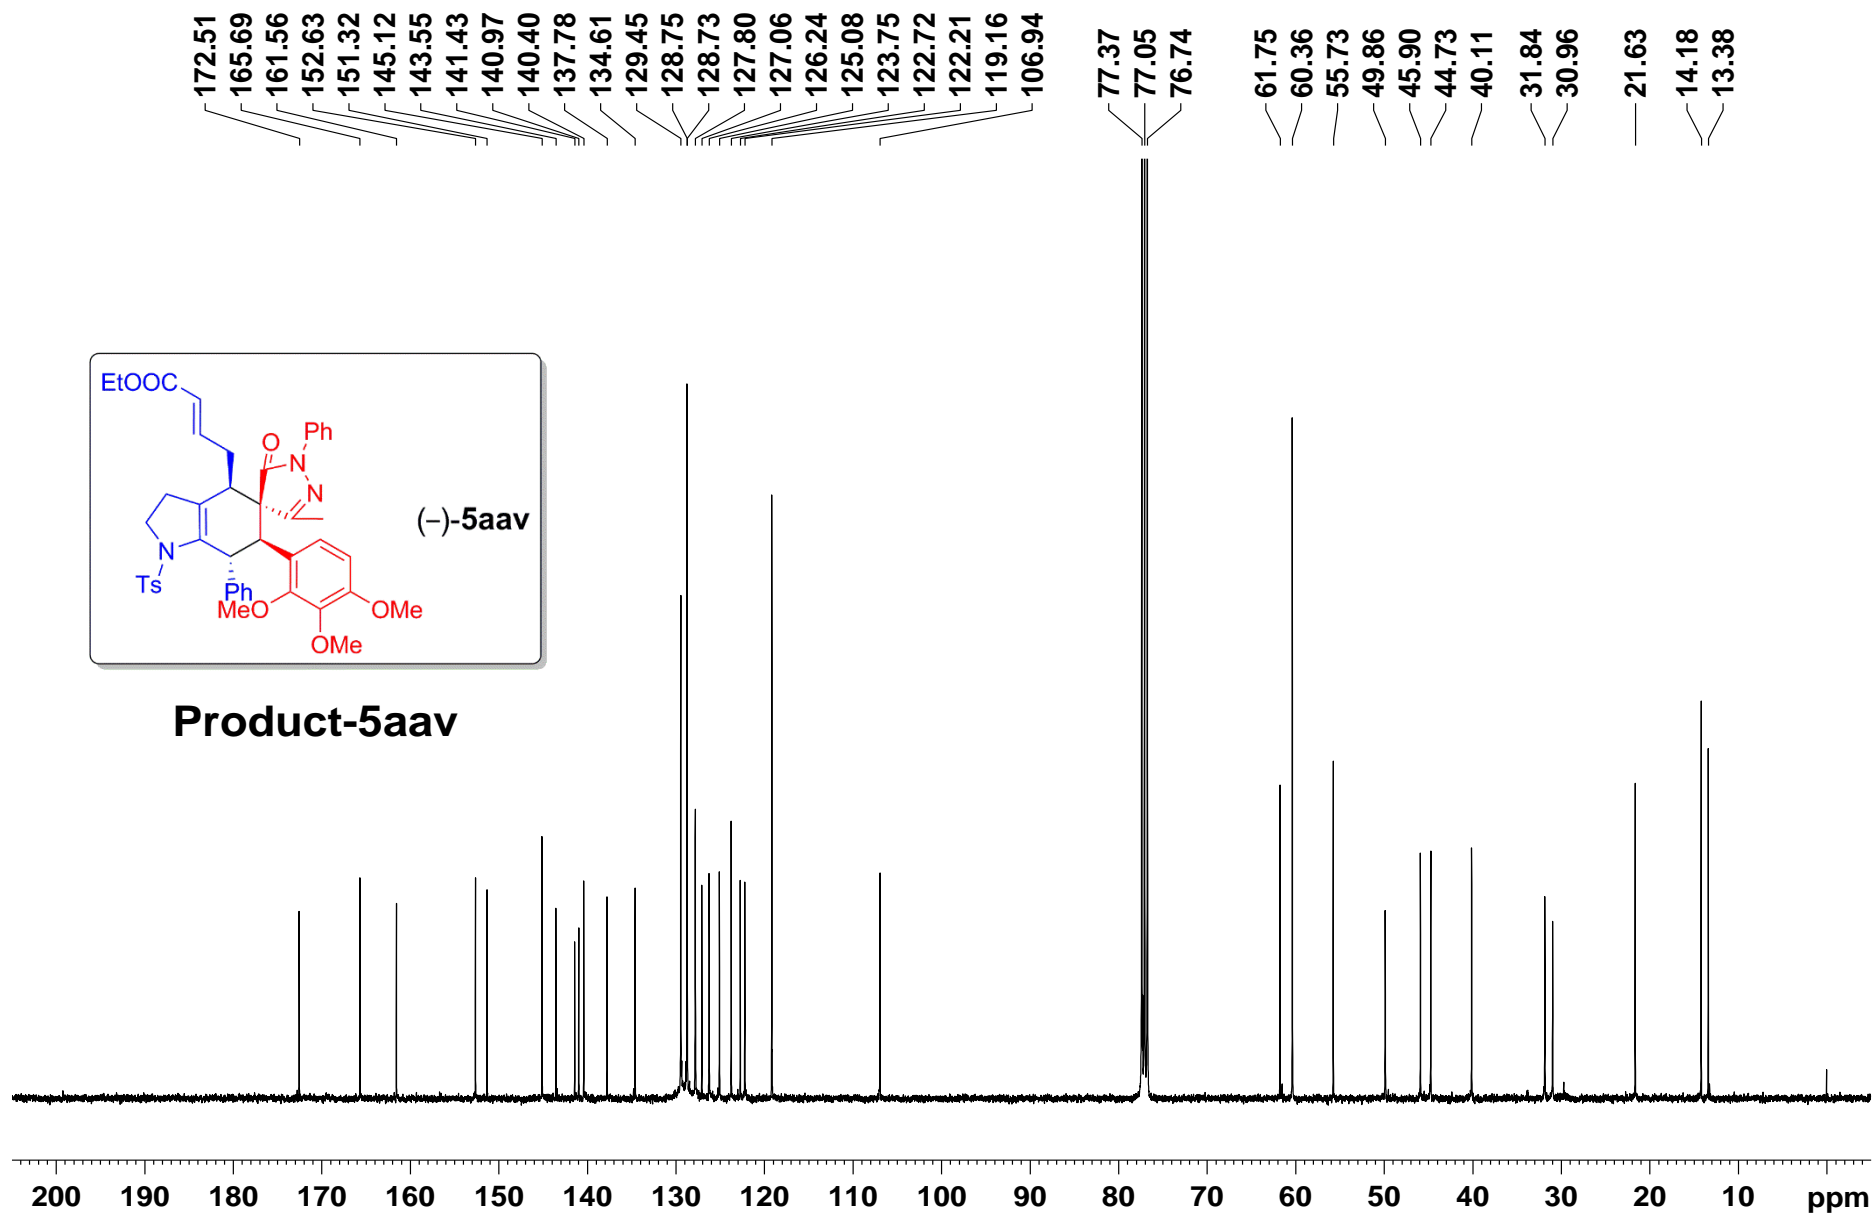

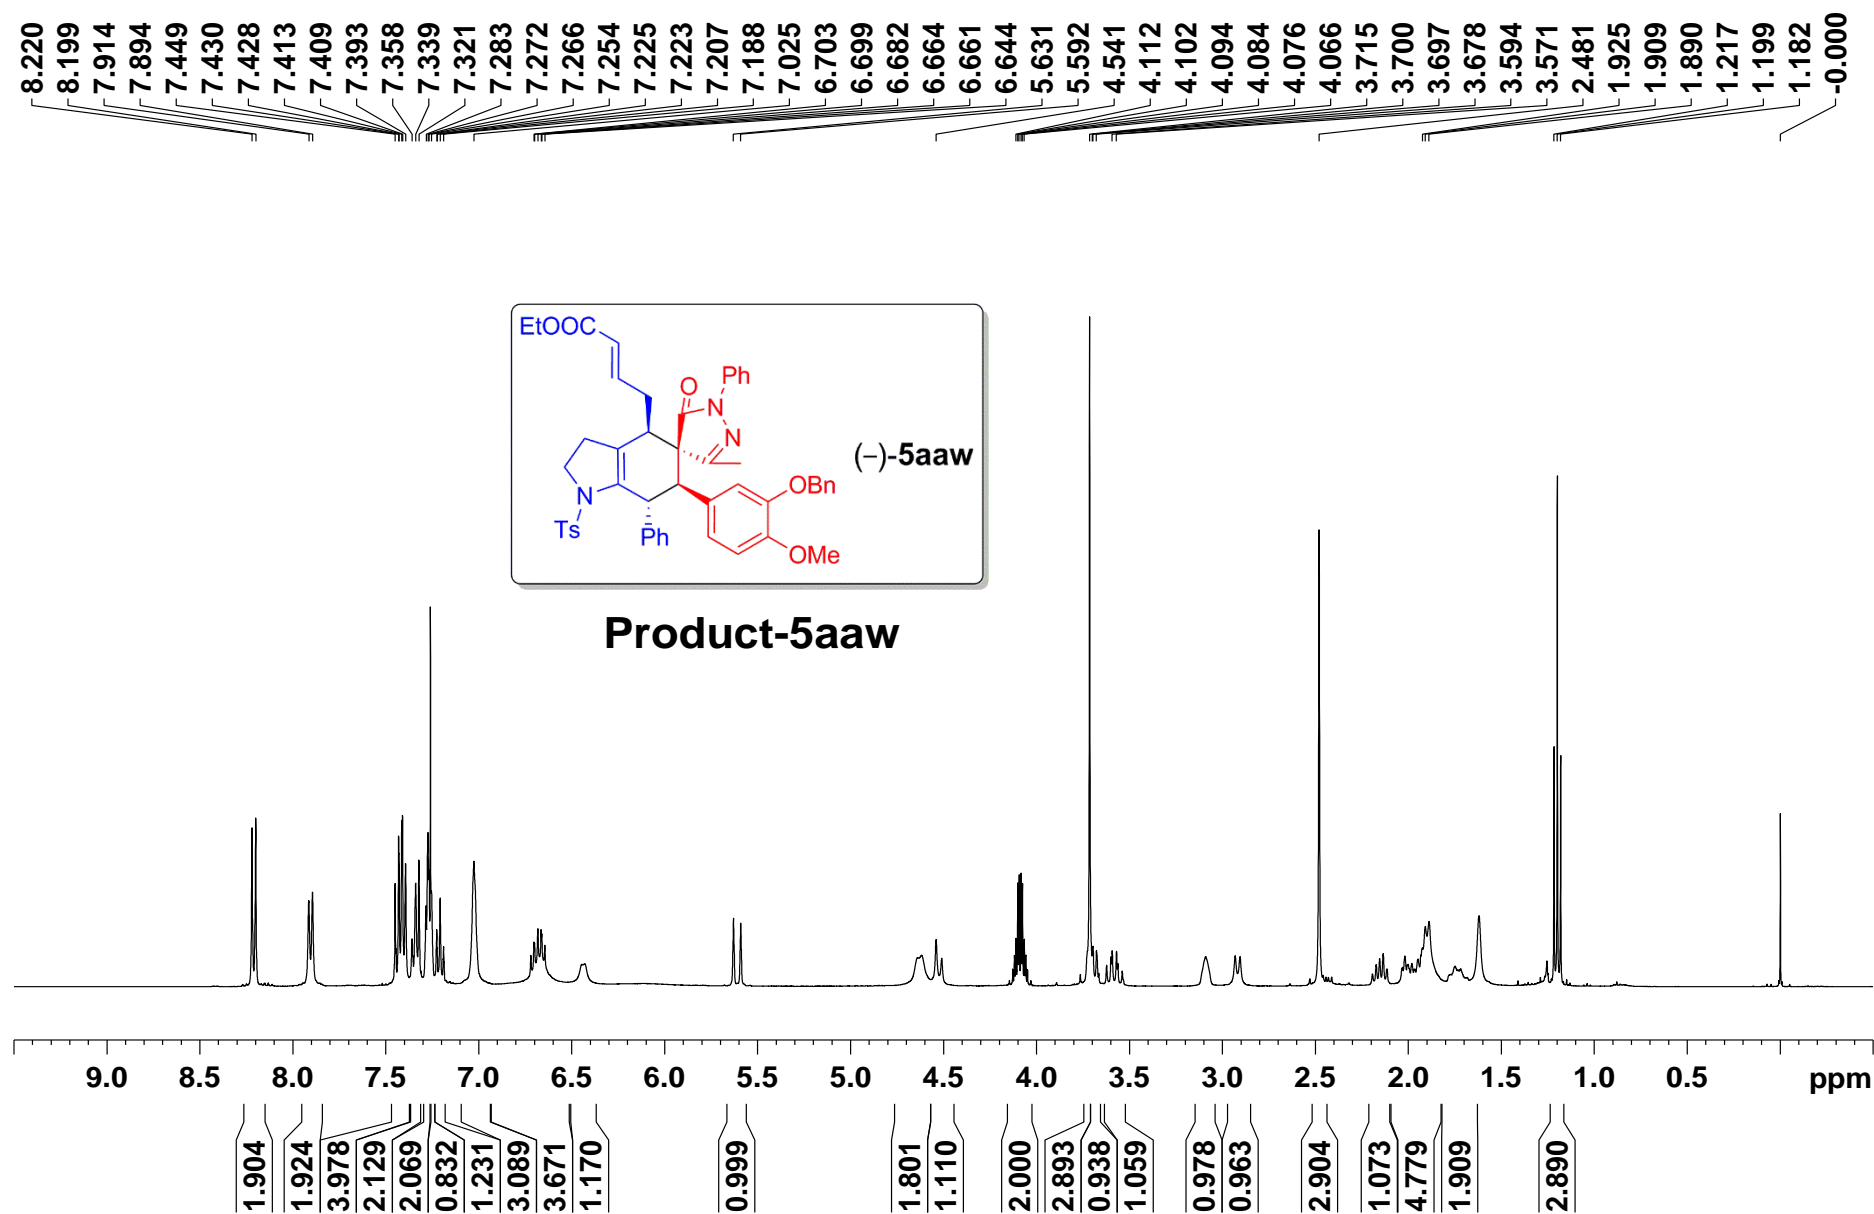



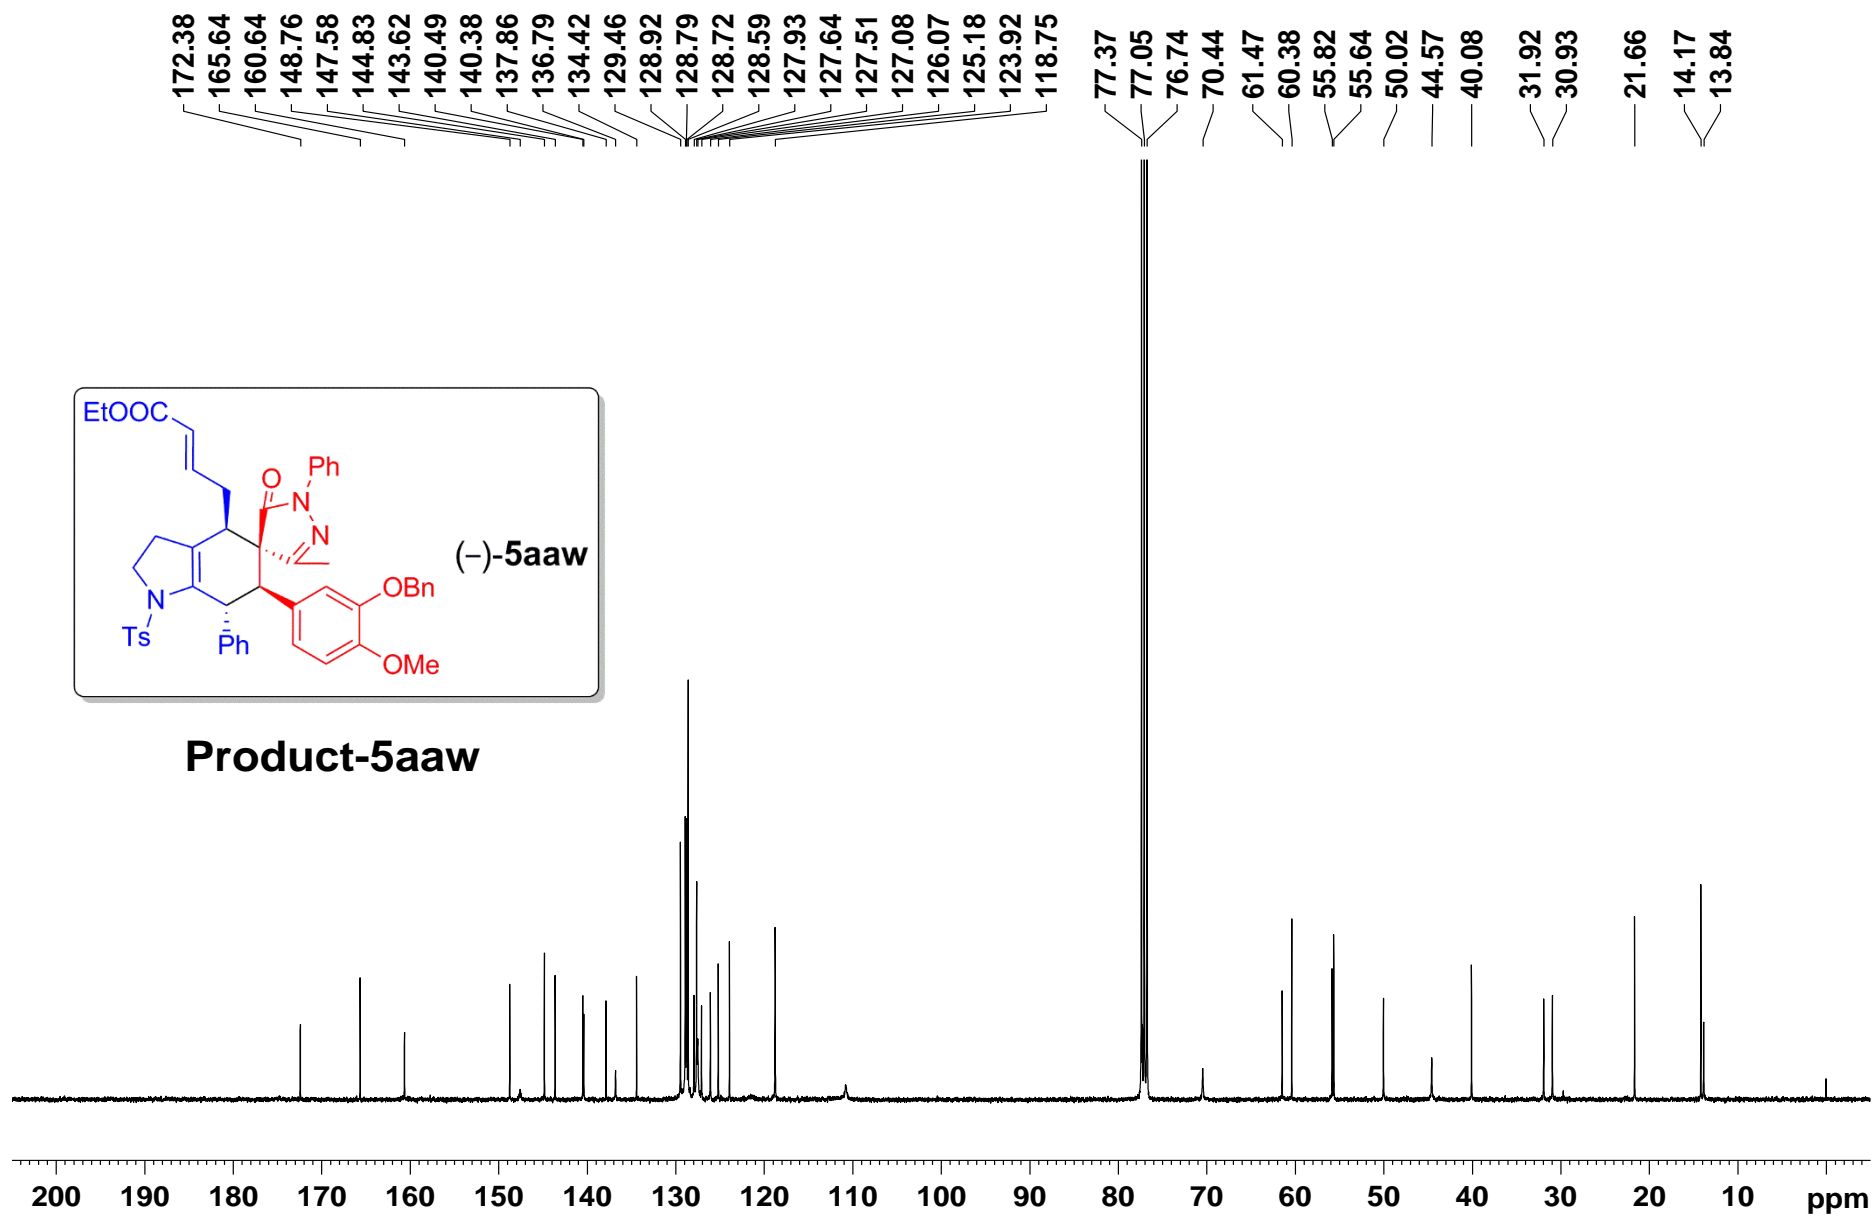

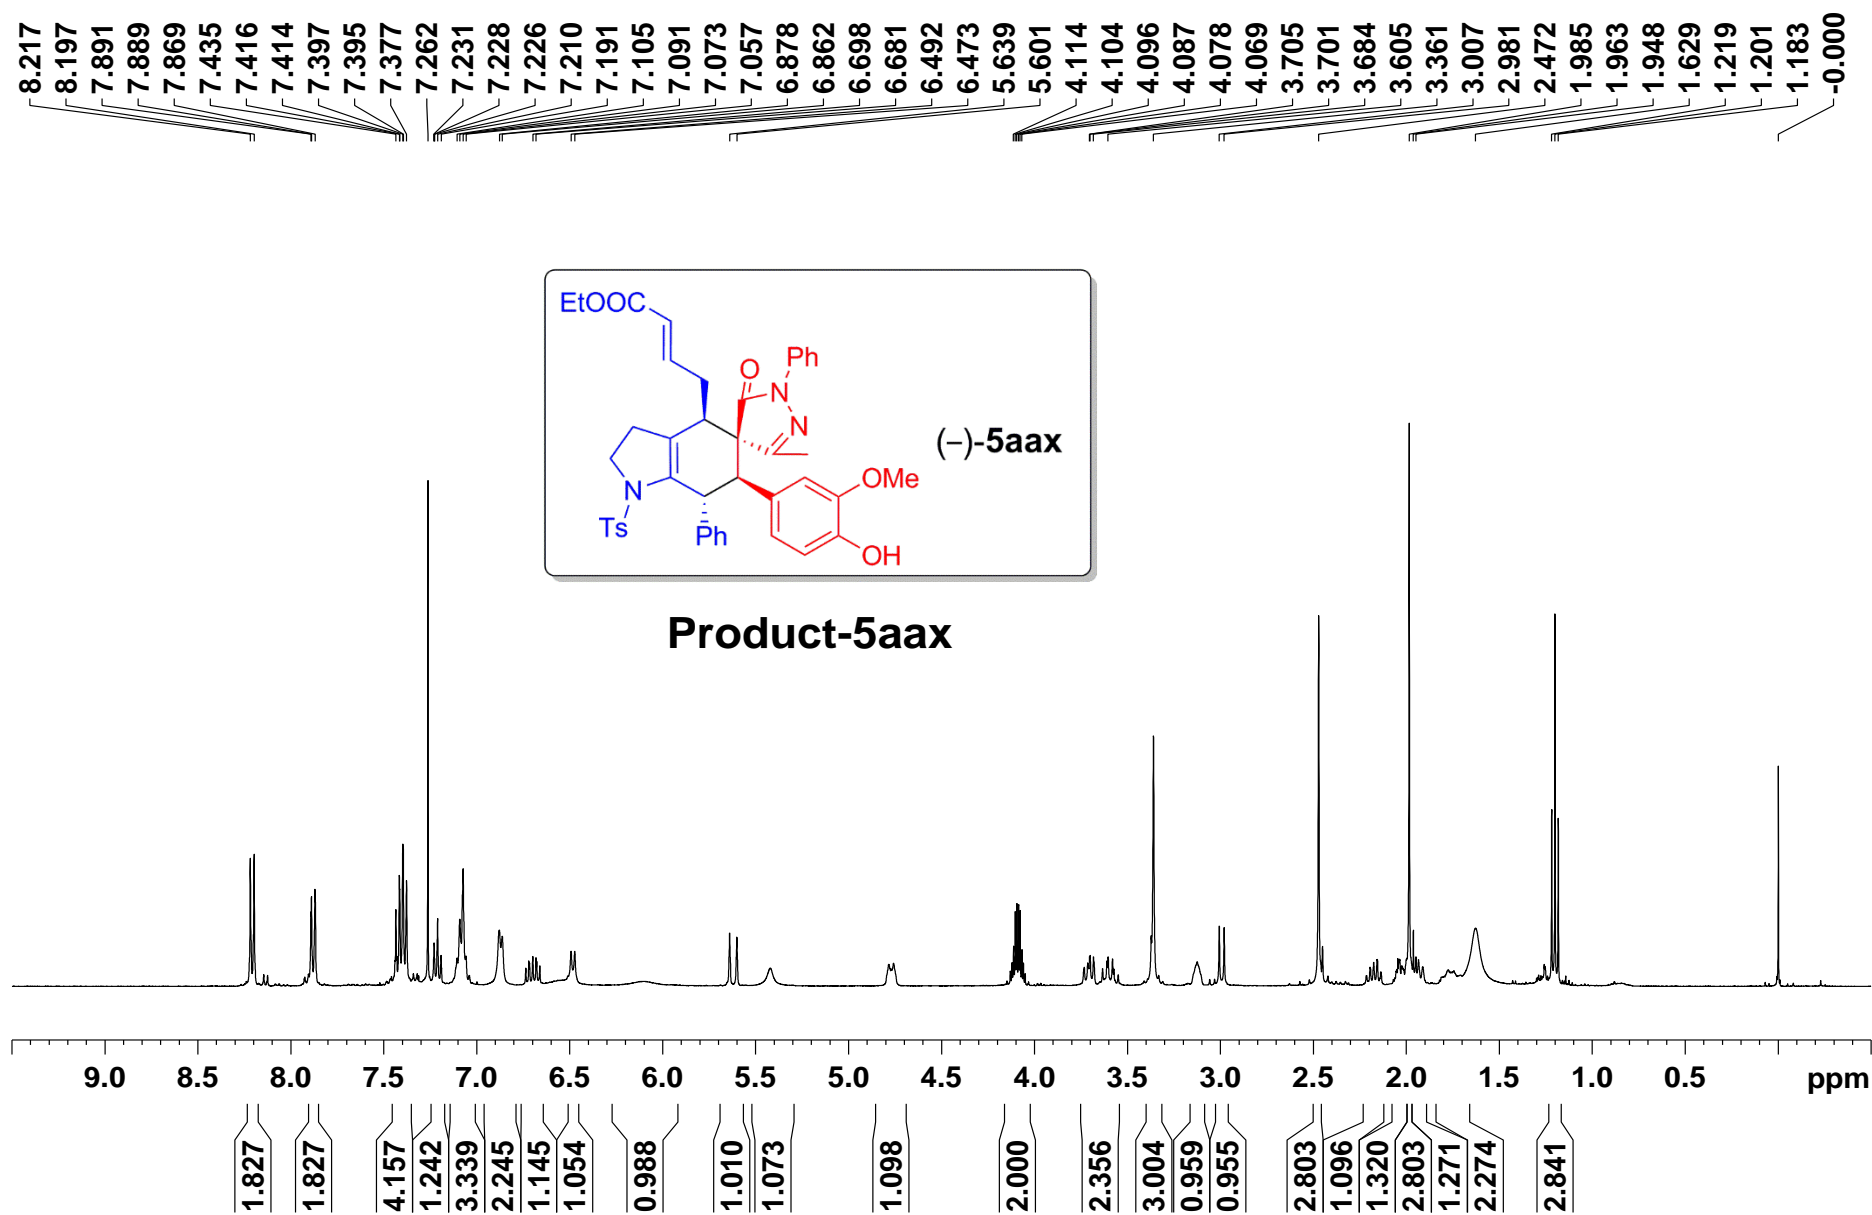

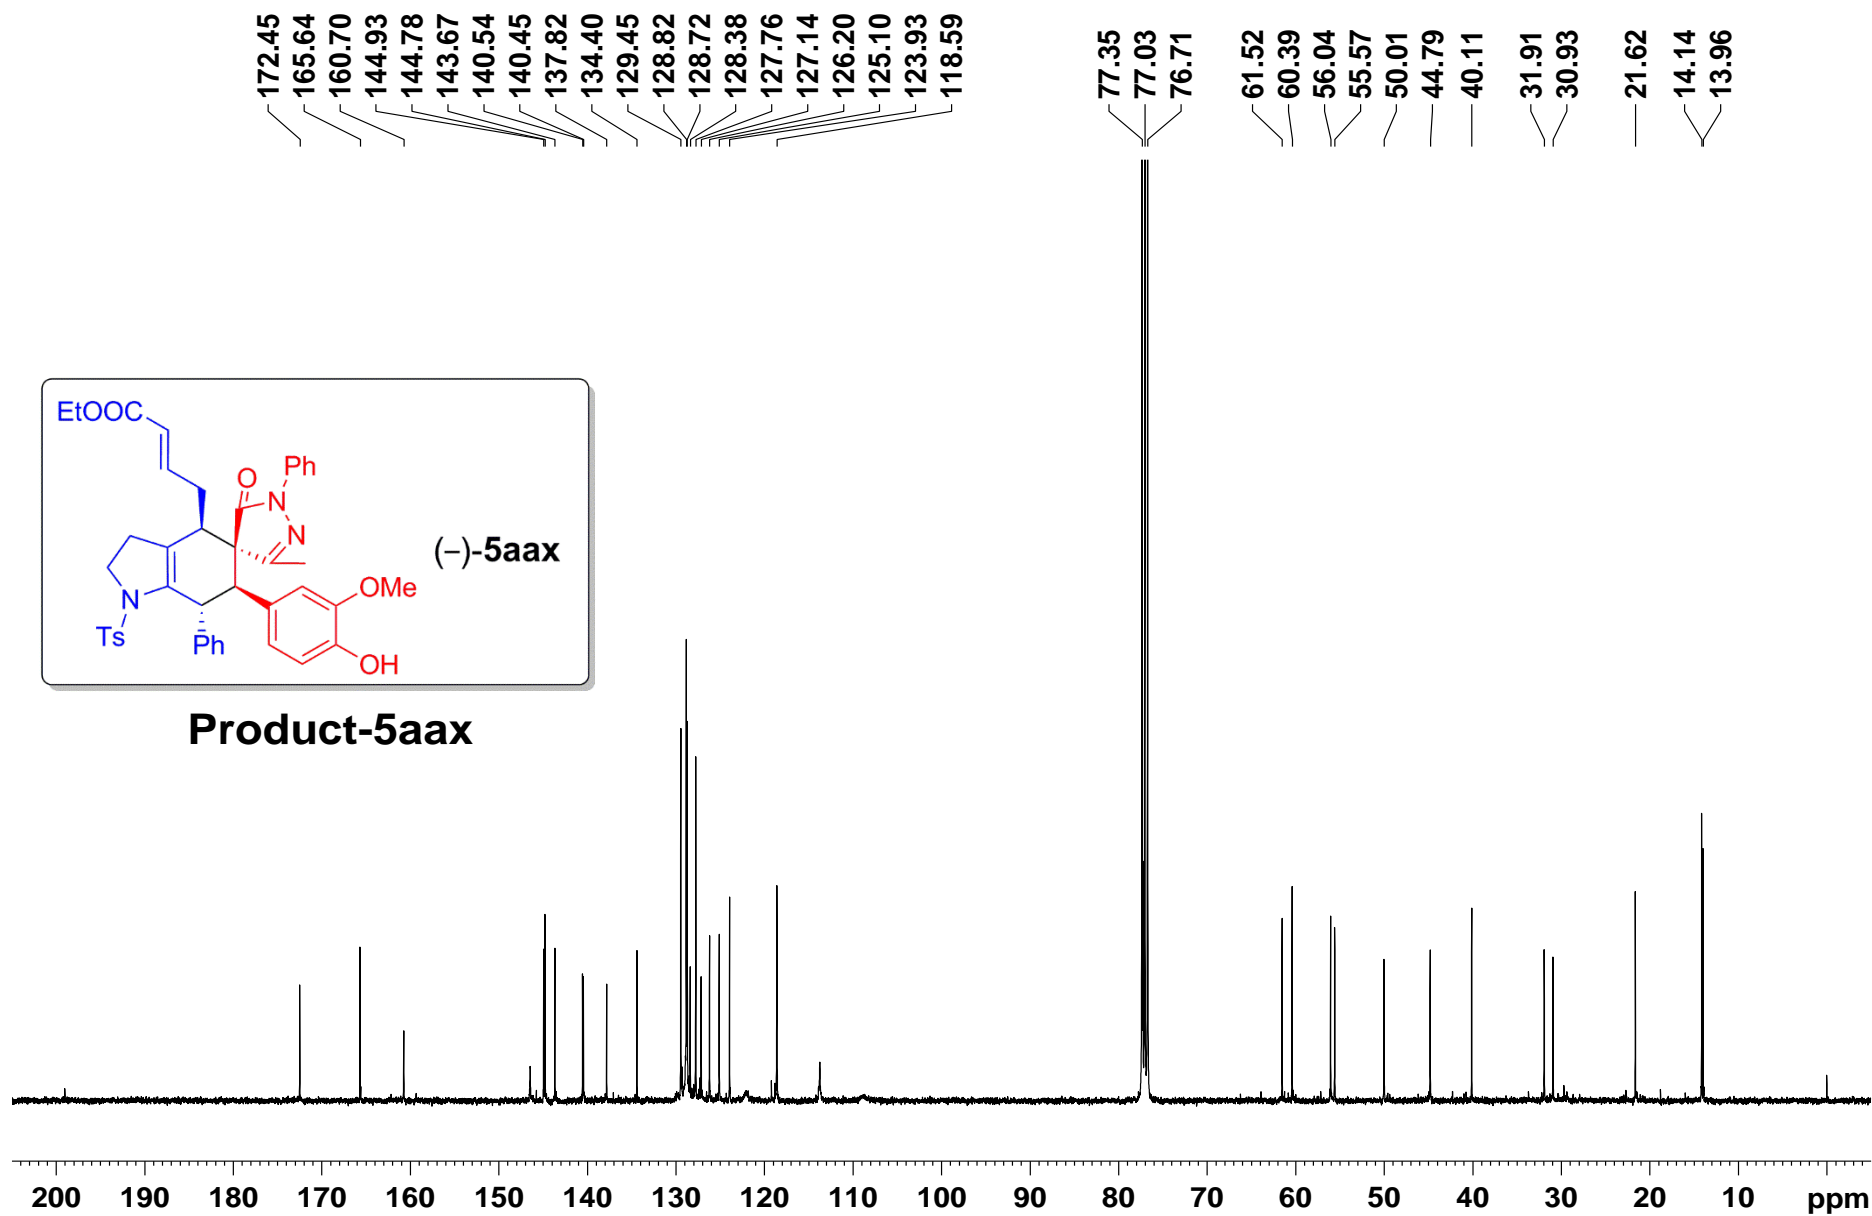

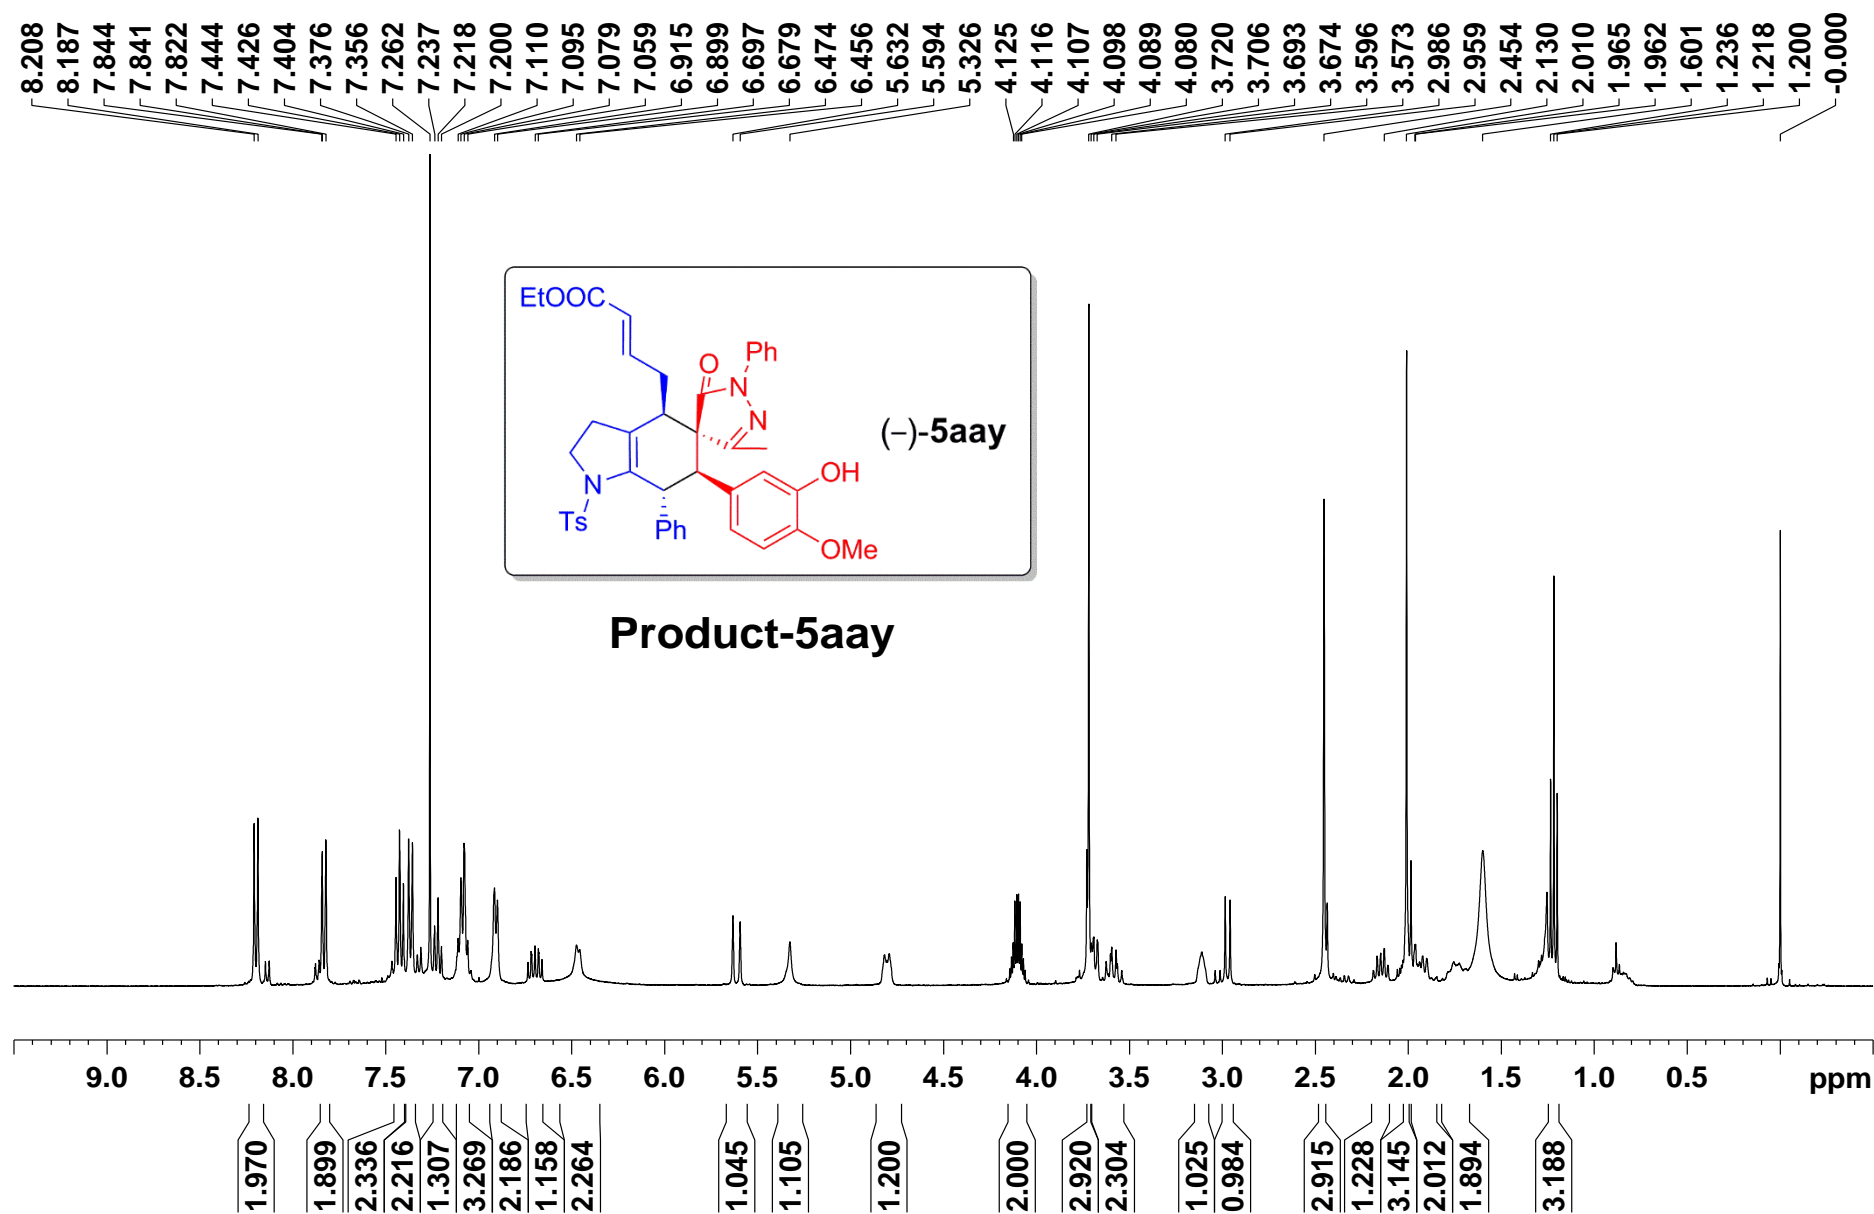

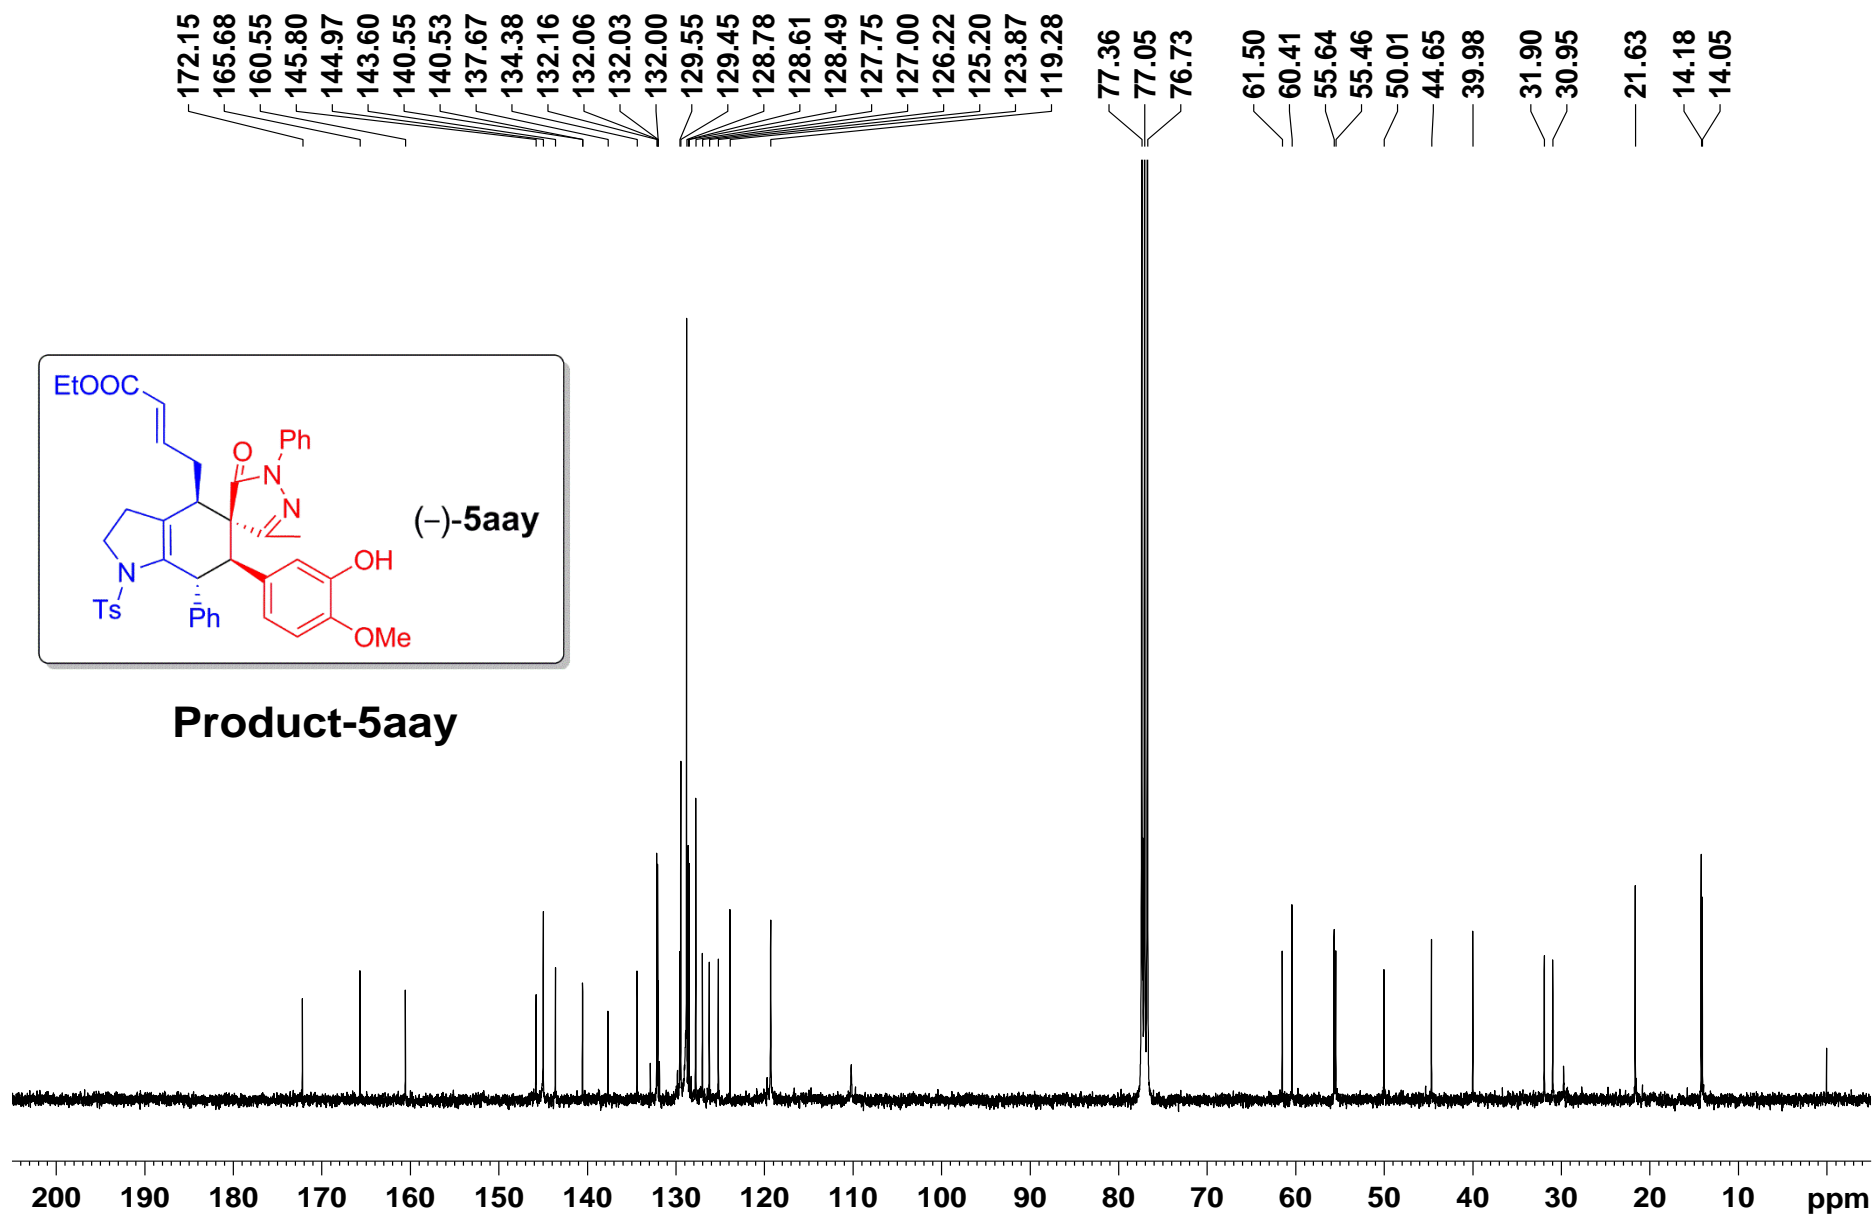

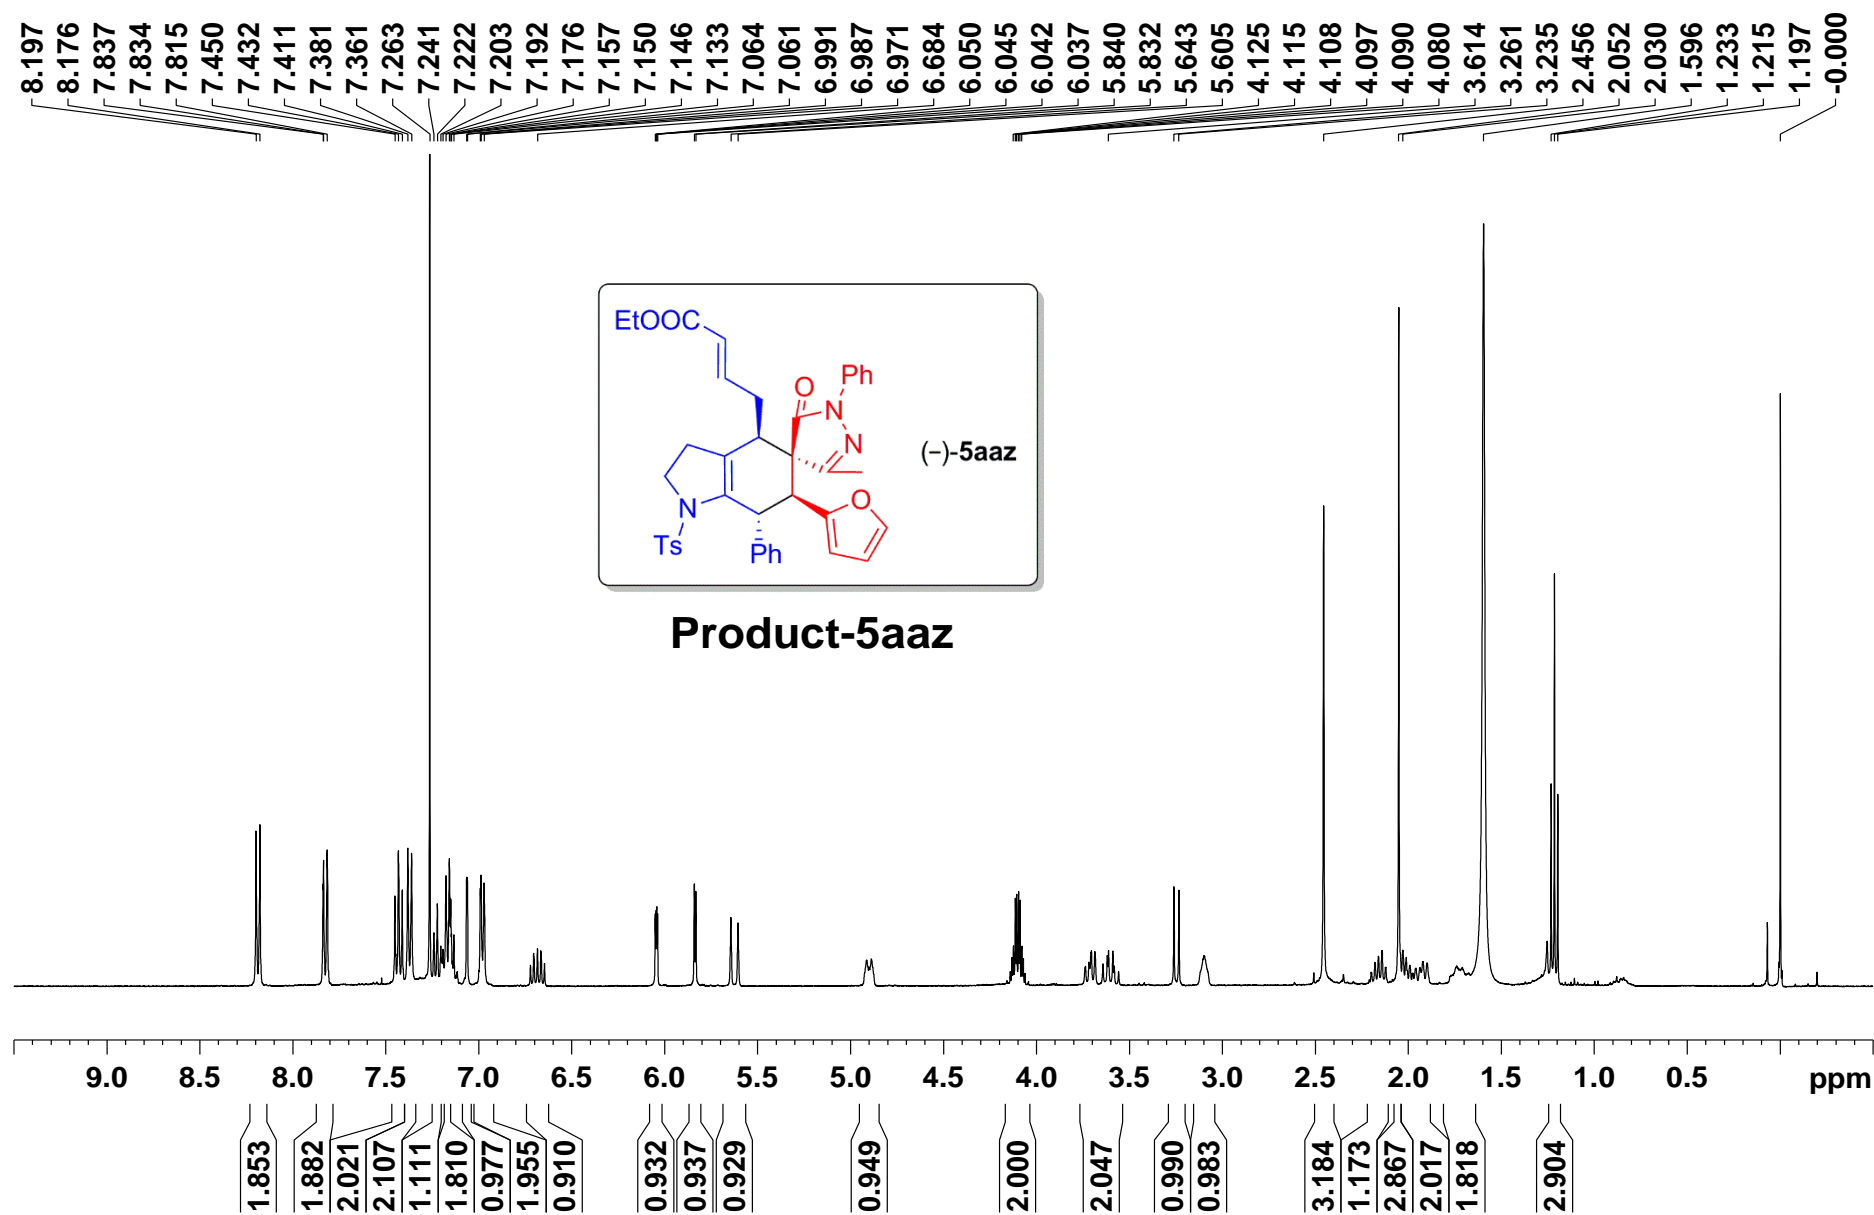

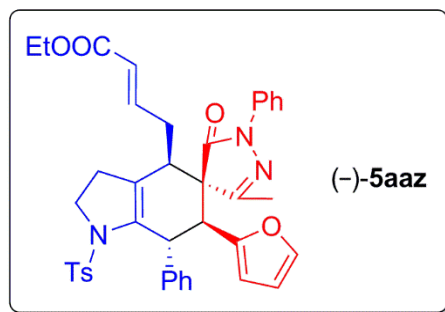

**Product-5aaz**

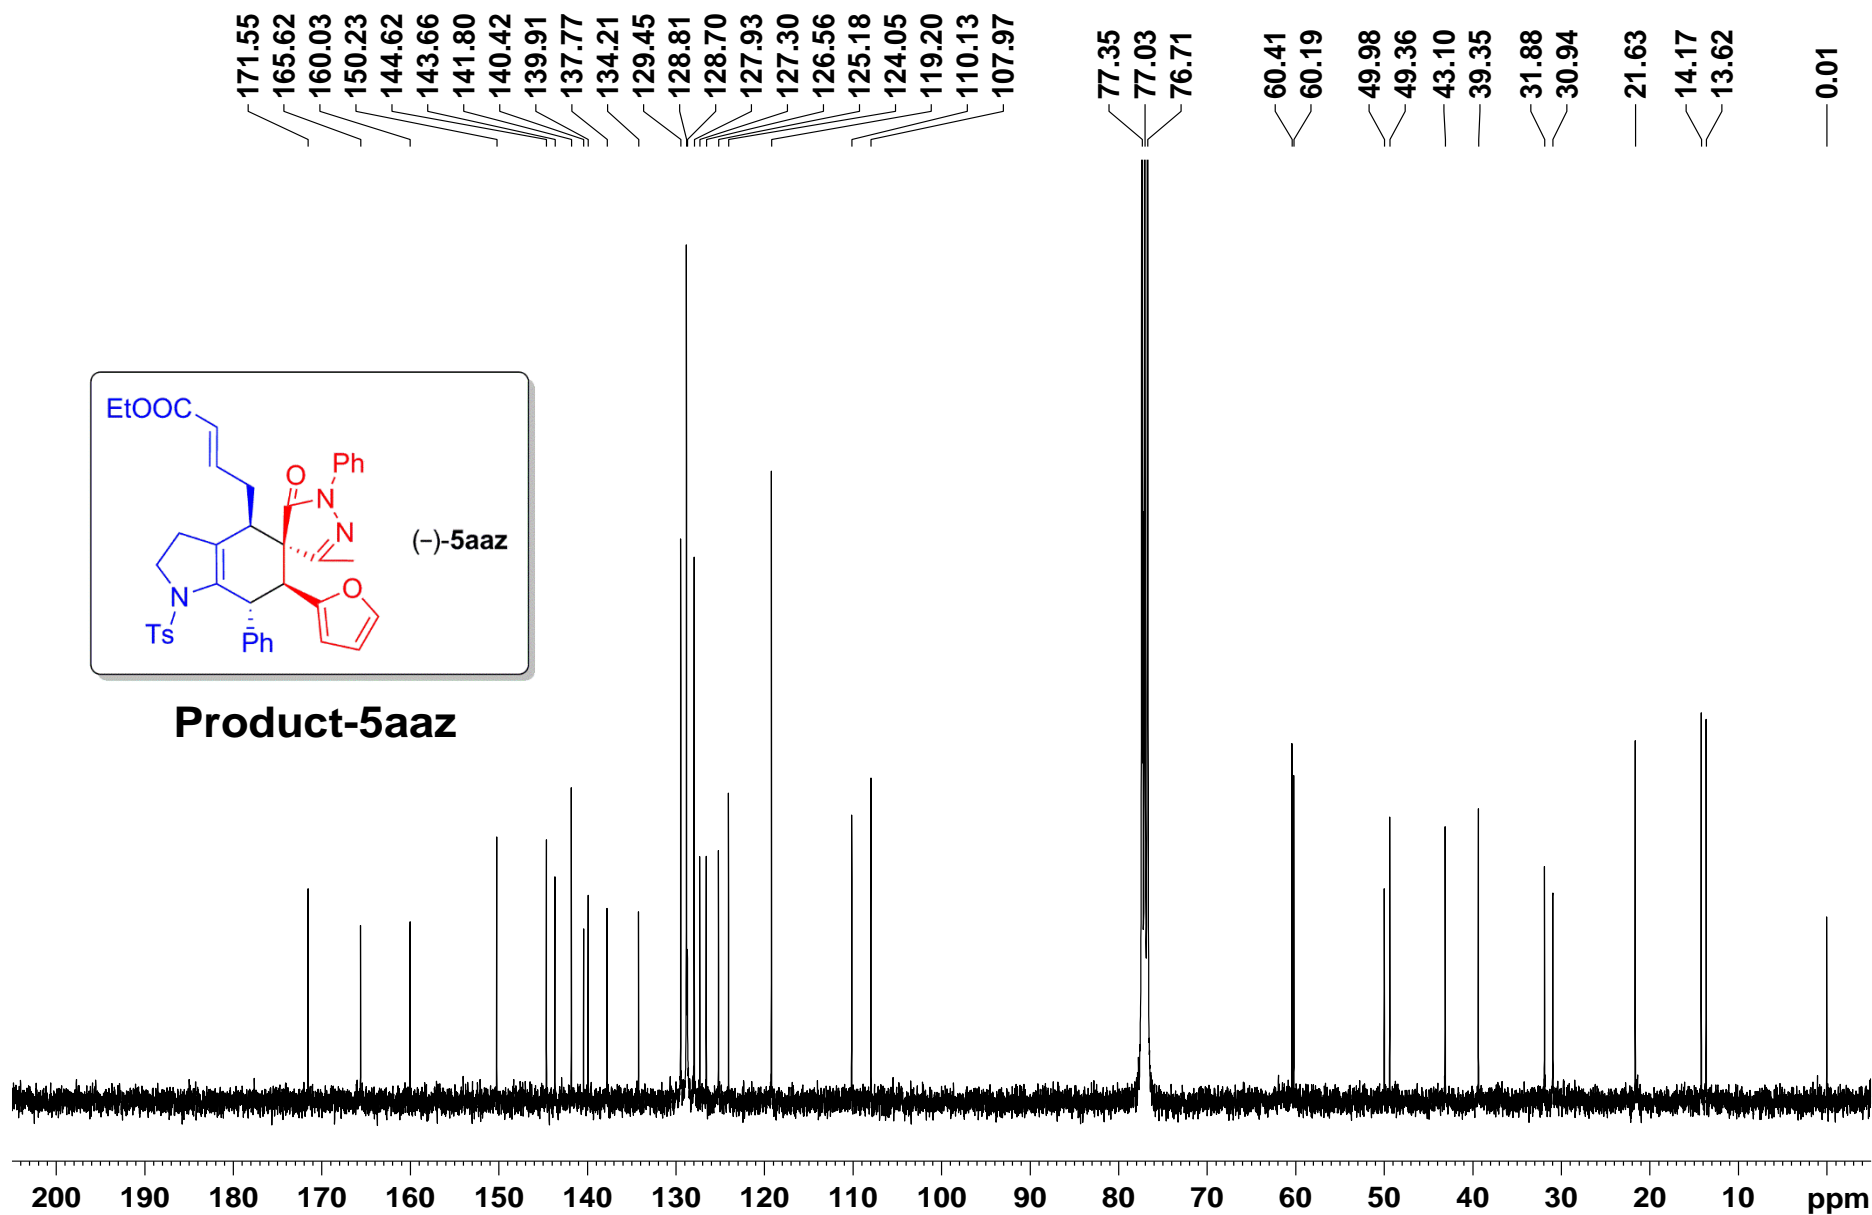

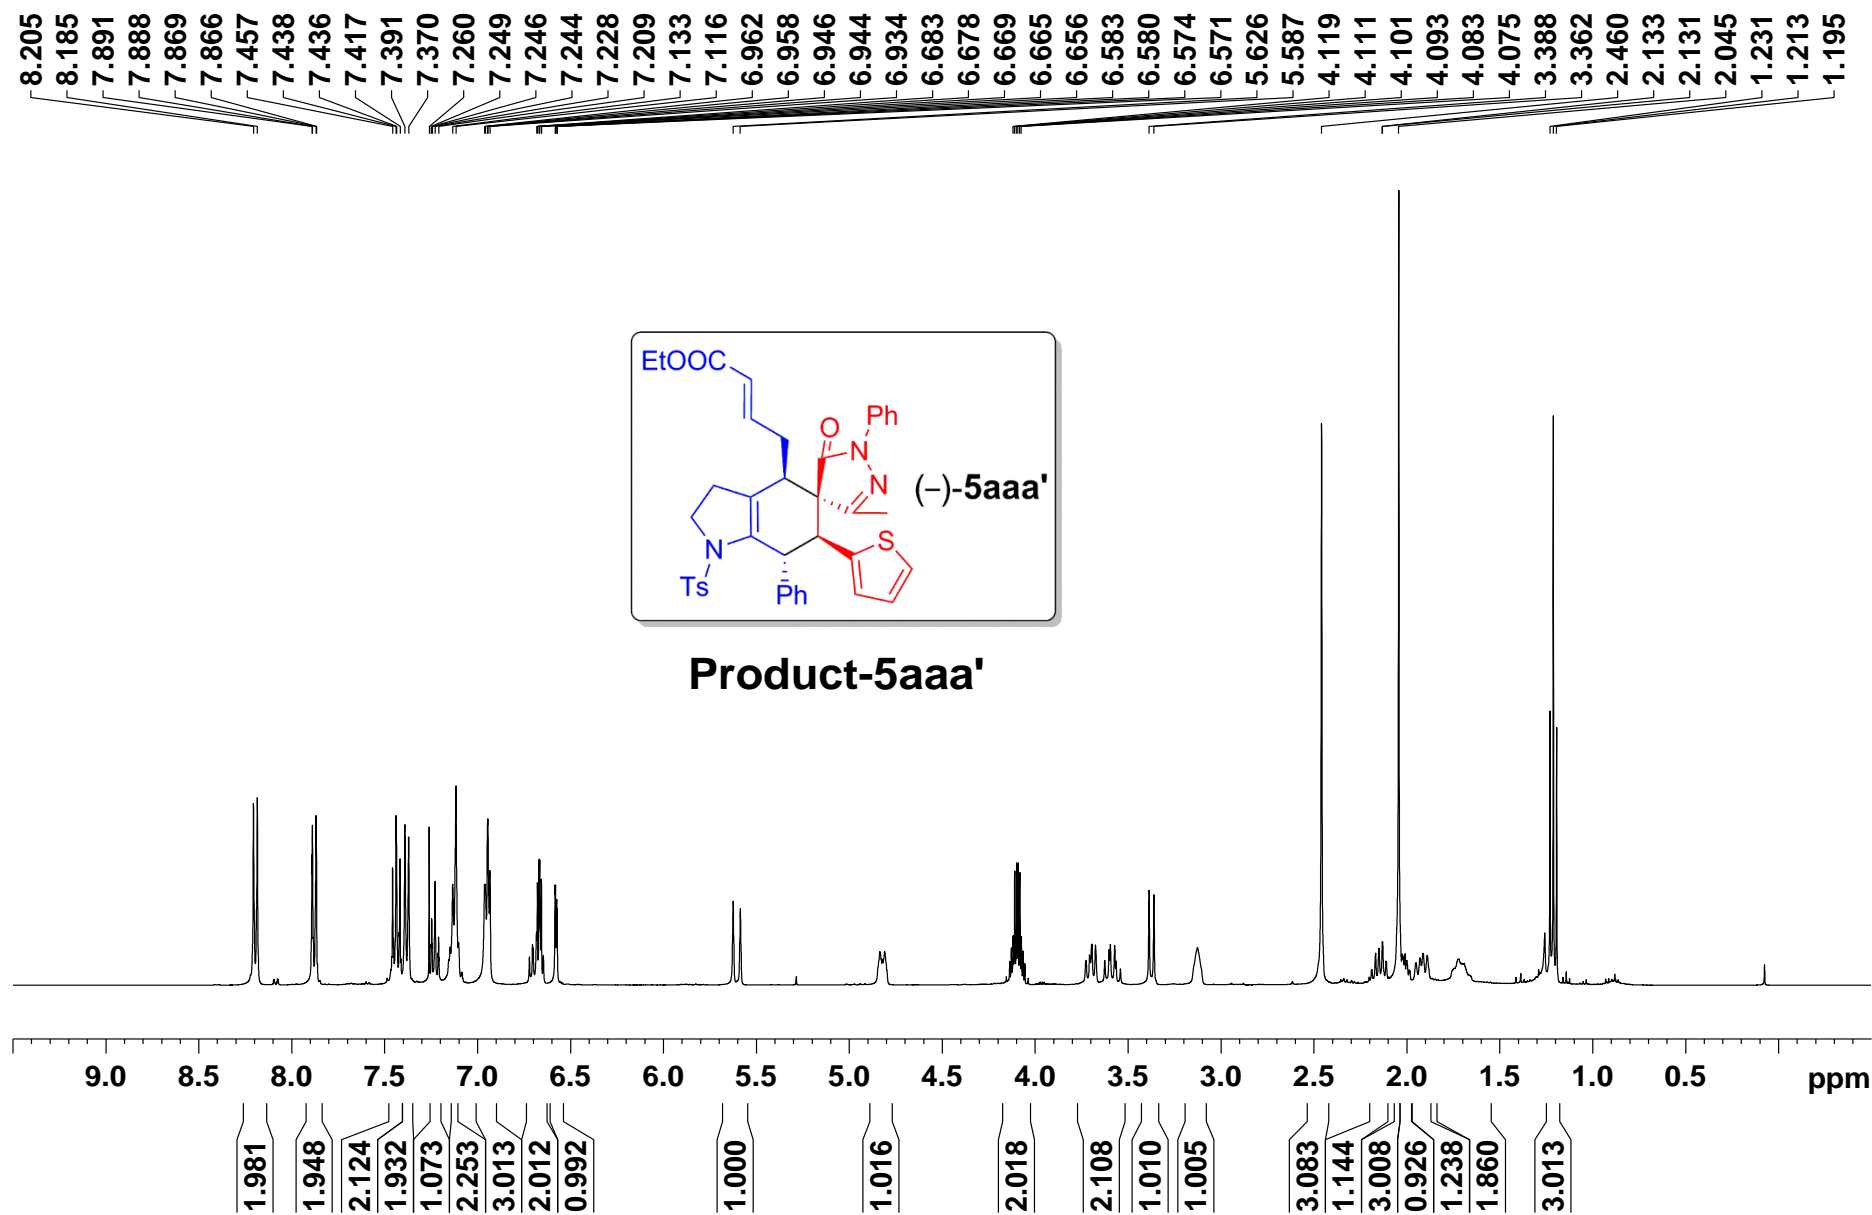



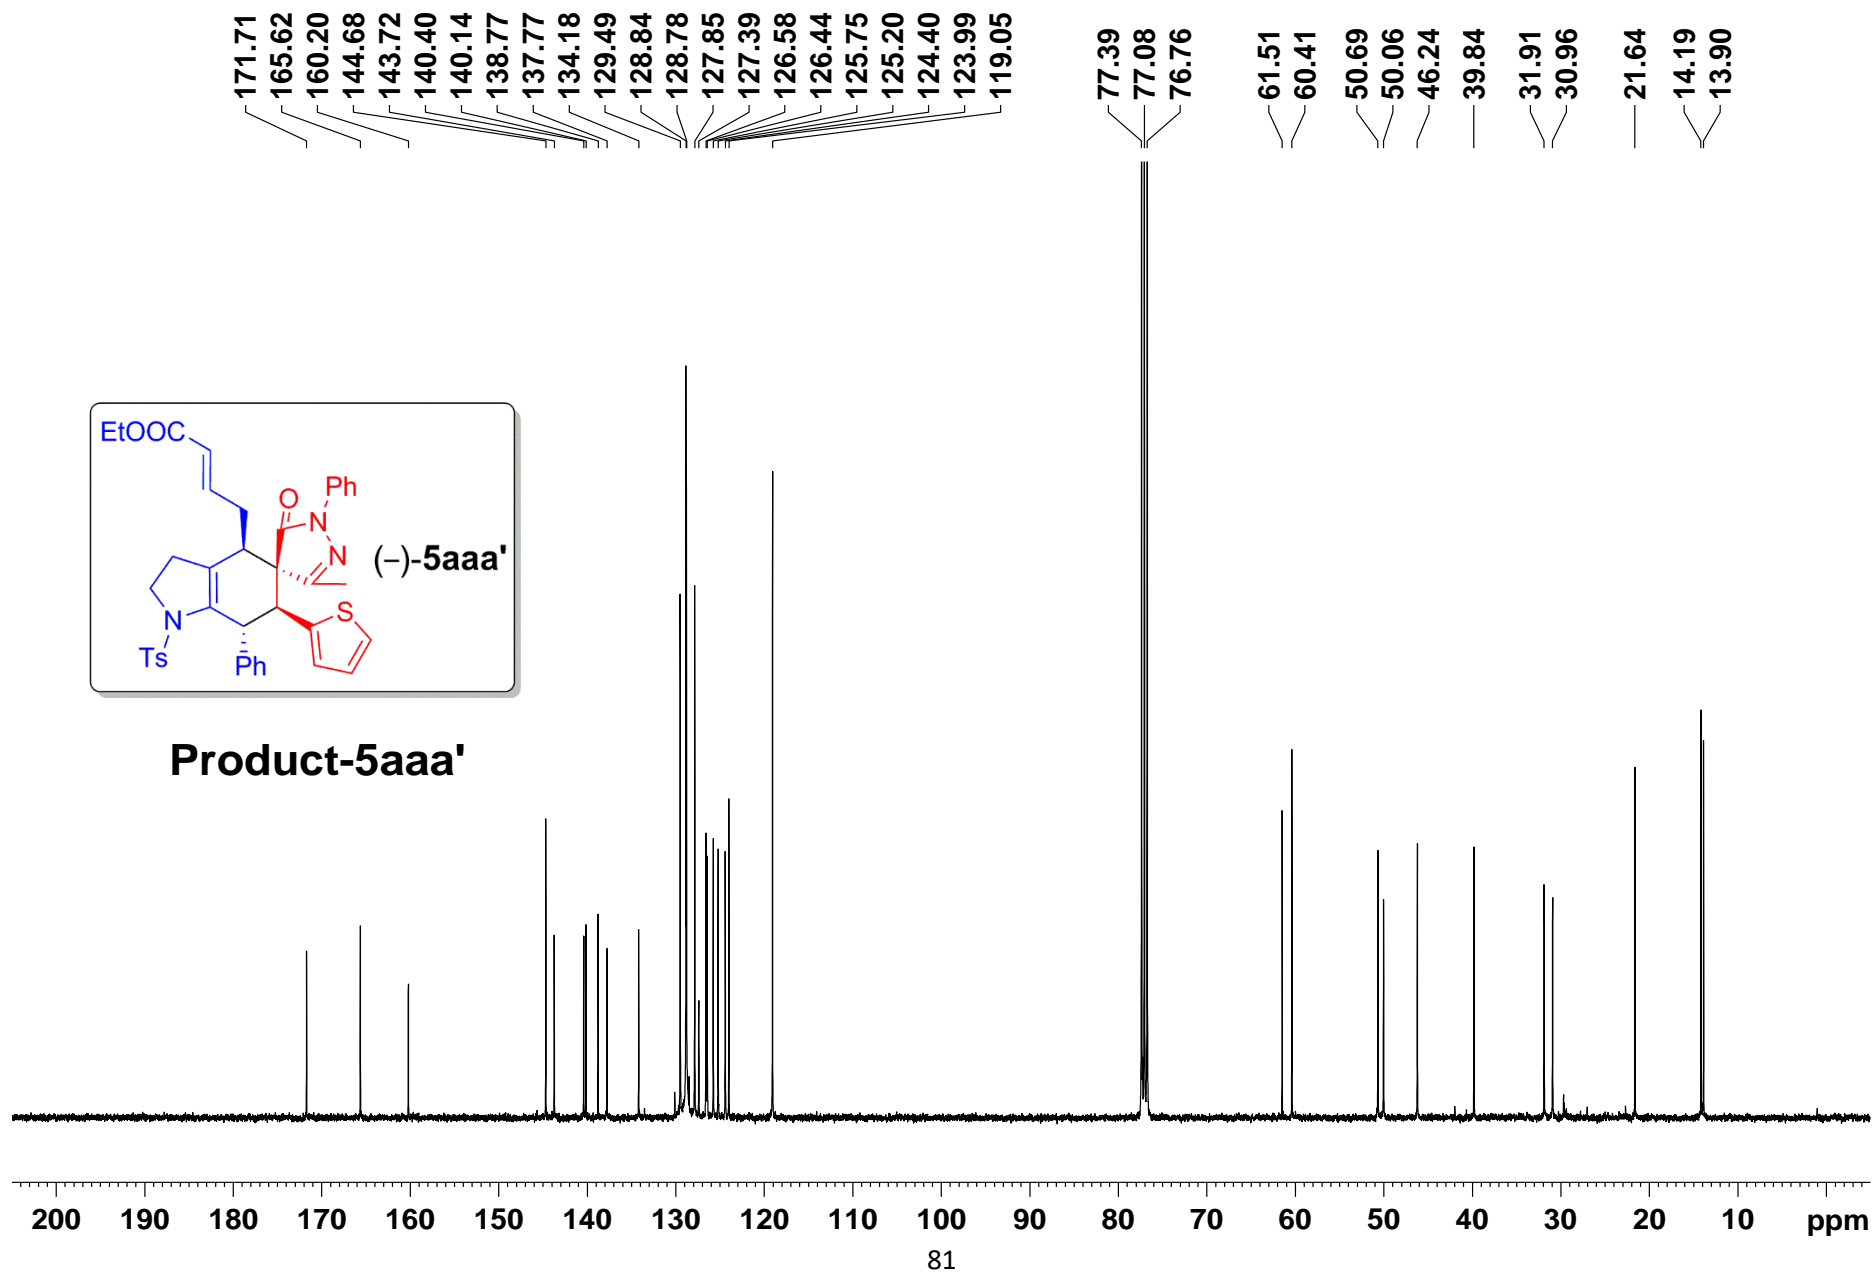

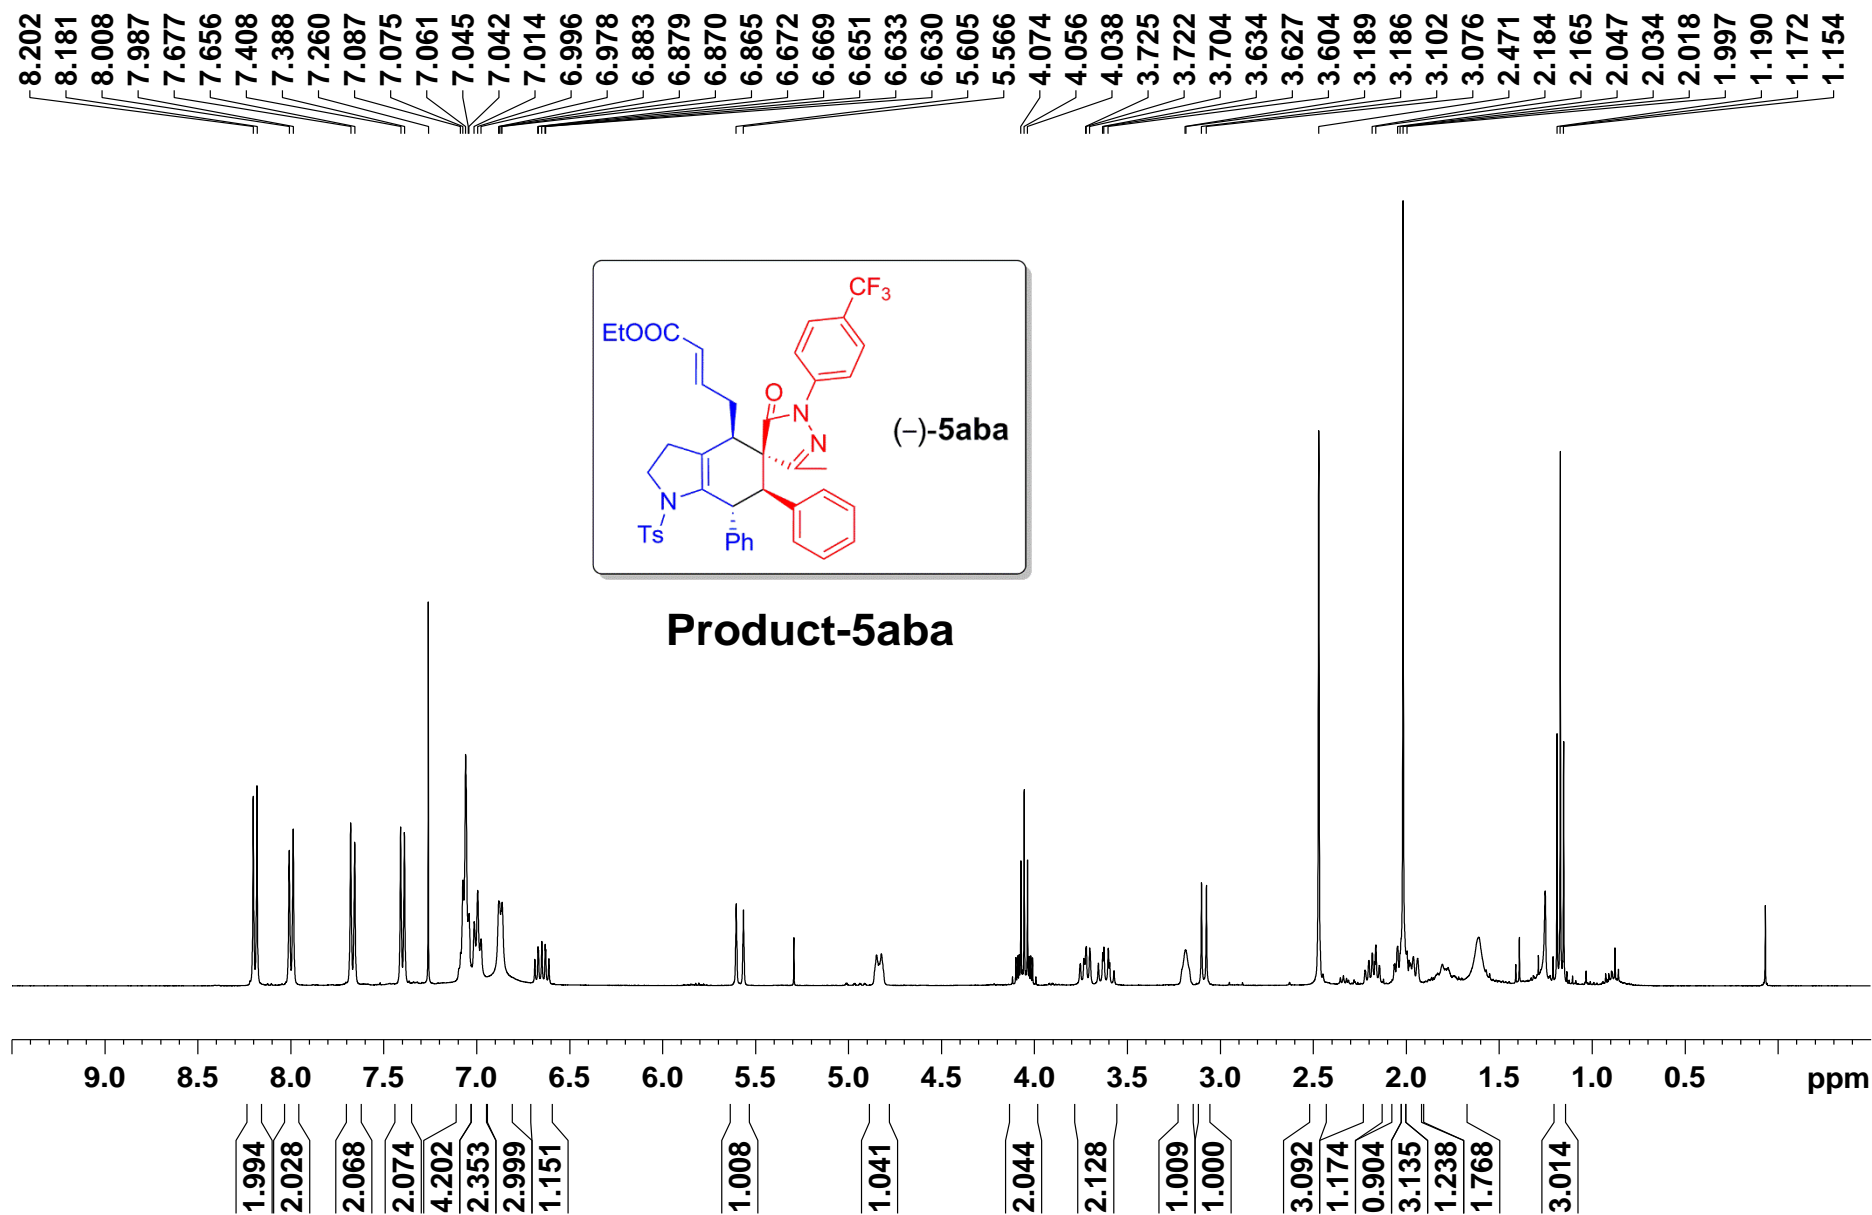

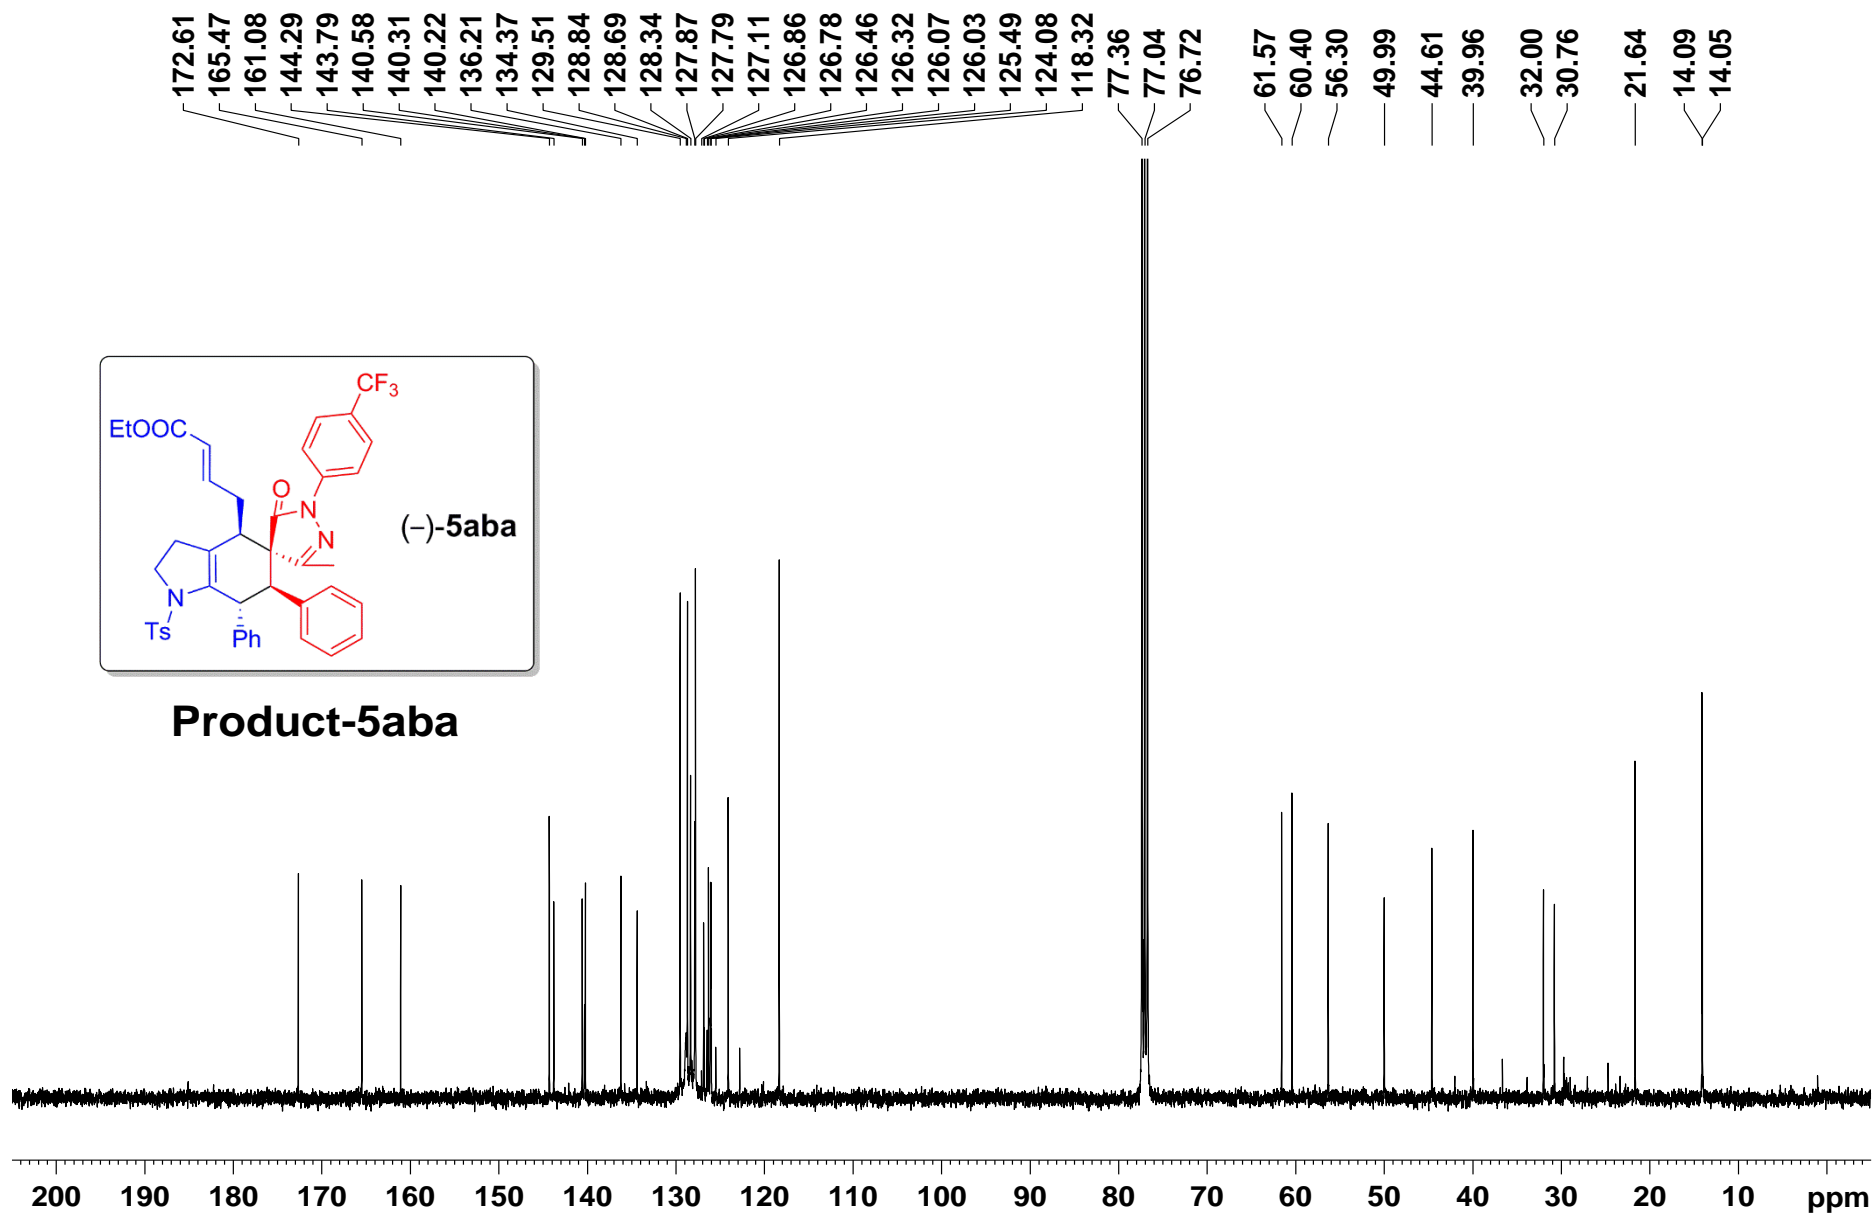

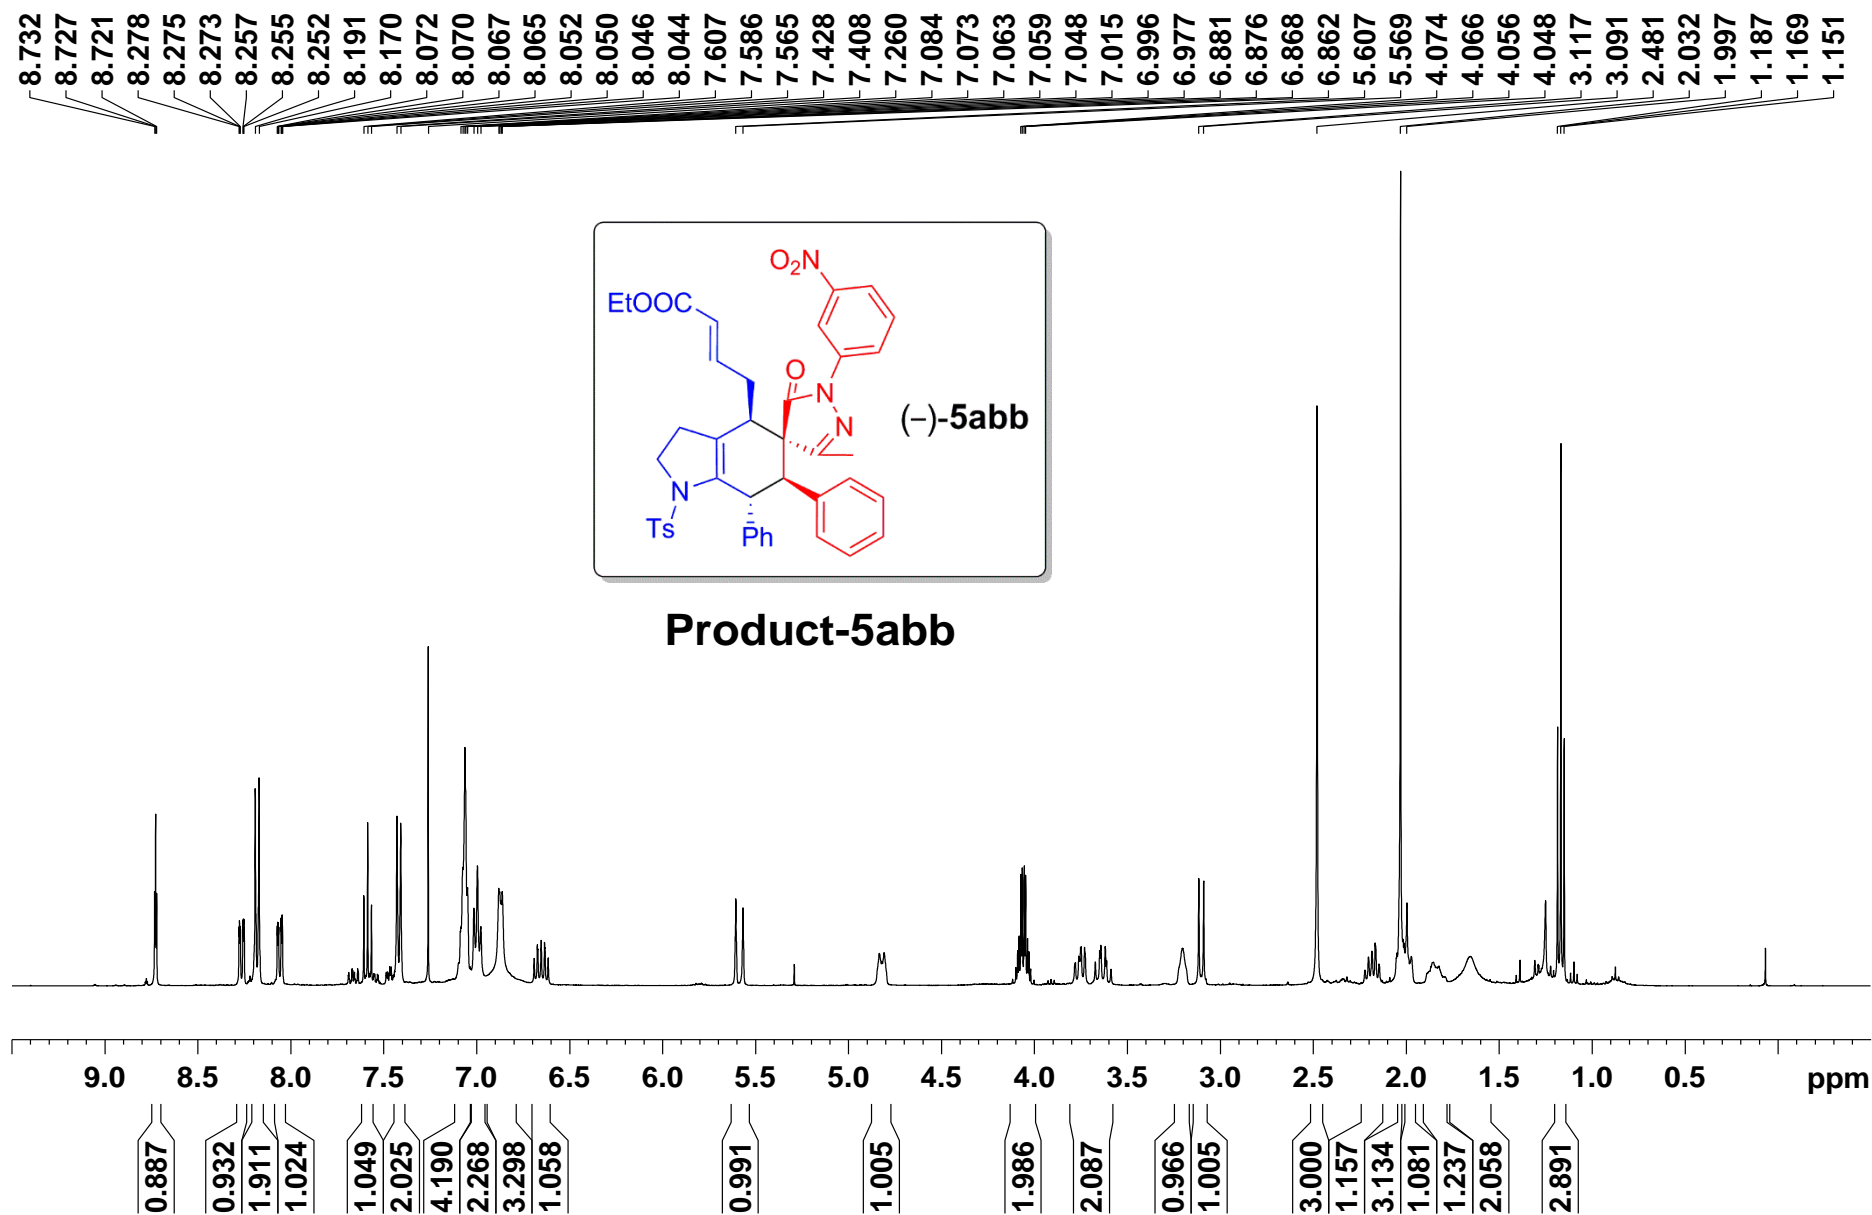

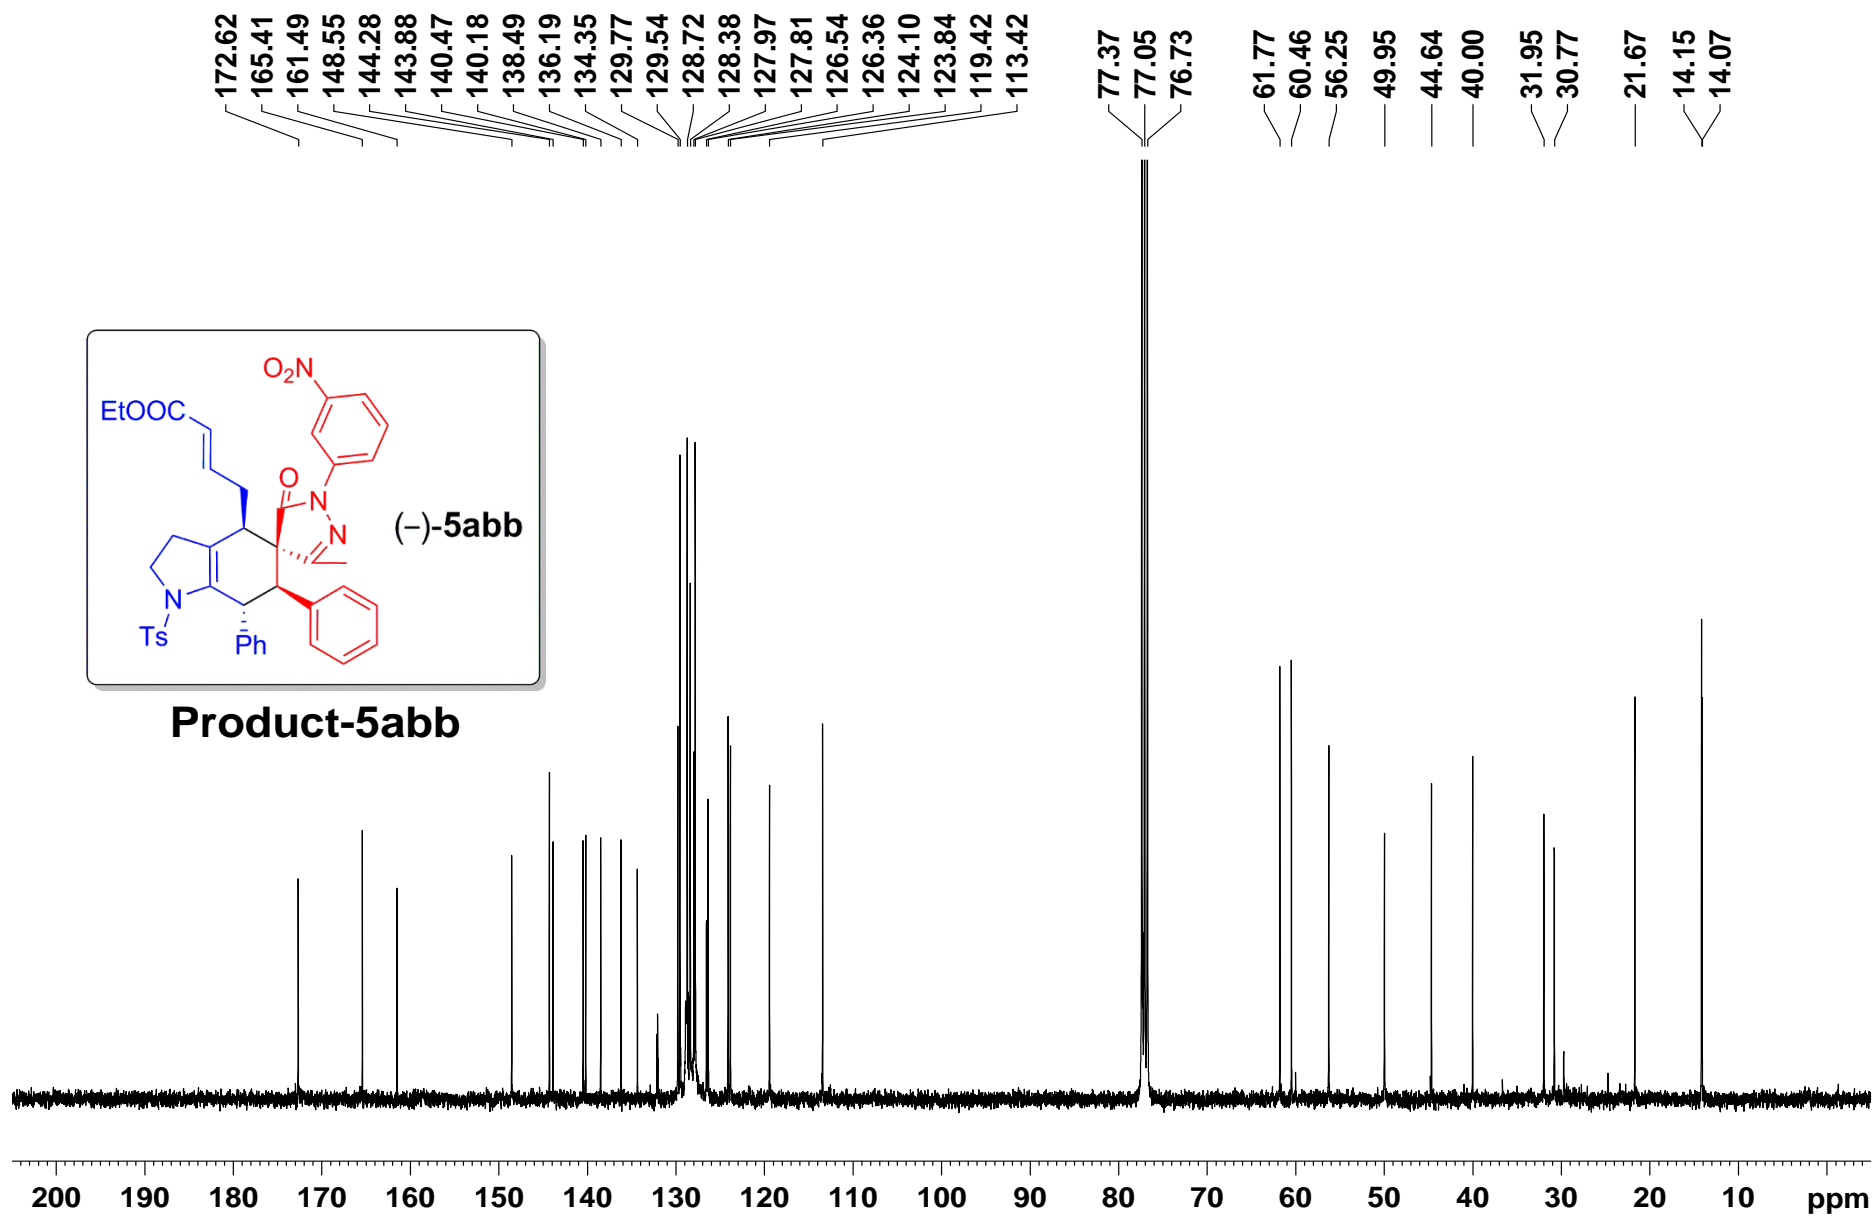

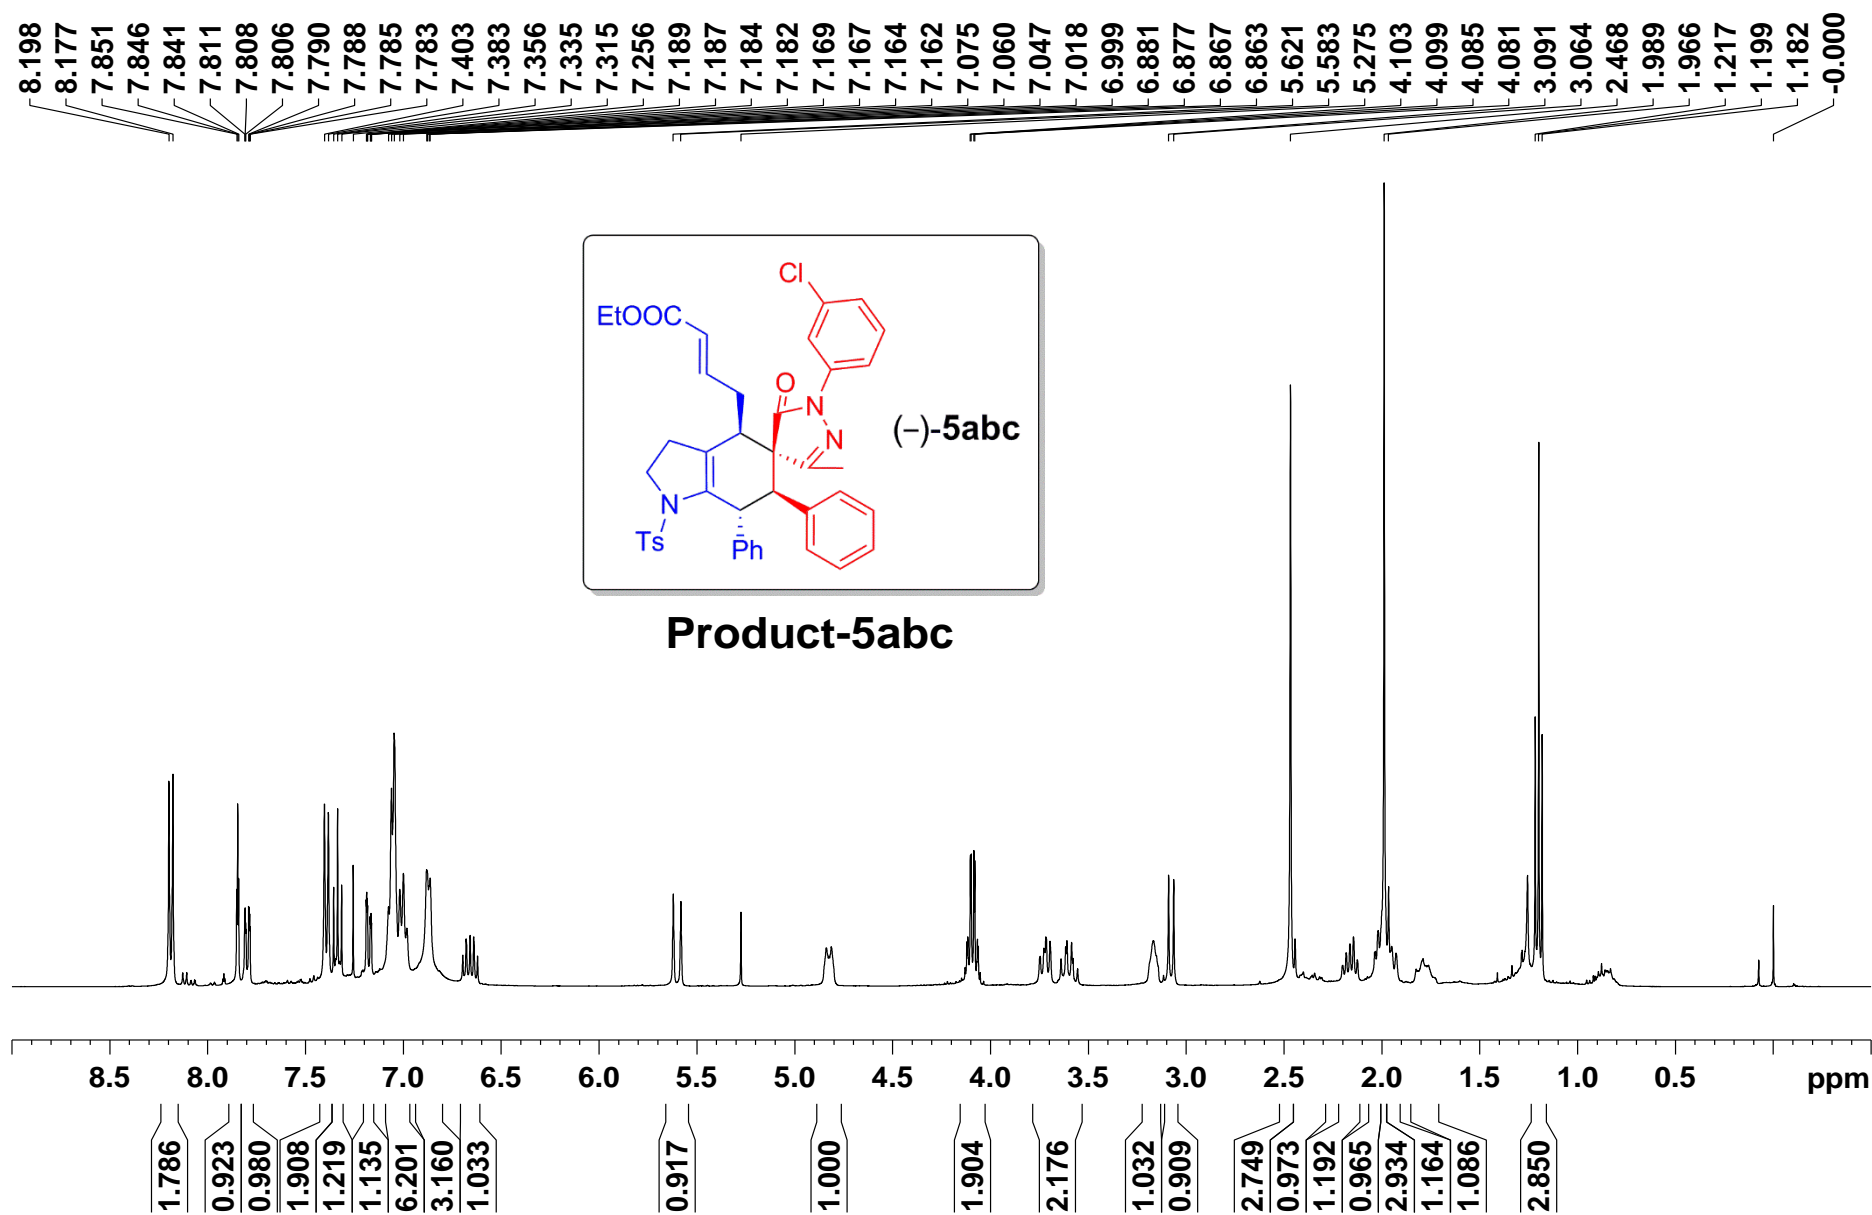

172.31  
165.55  
160.86  
144.45  
143.76  
140.44  
140.34  
138.65  
136.31  
134.52  
134.39  
129.90  
129.51  
128.73  
128.31  
127.82  
127.75  
127.01  
126.26  
125.04  
124.06  
118.80  
116.69

77.40  
77.08  
76.76

61.54  
60.44  
56.24

50.01  
44.62  
39.92

31.95  
30.80

21.66

14.17  
14.01

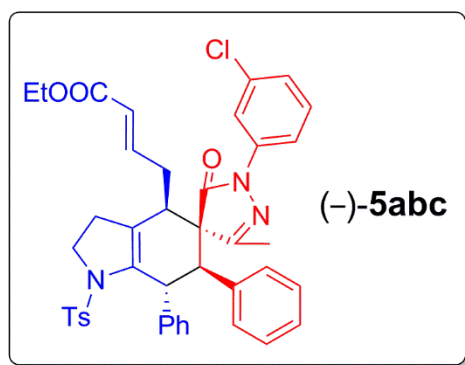

**Product-5abc**

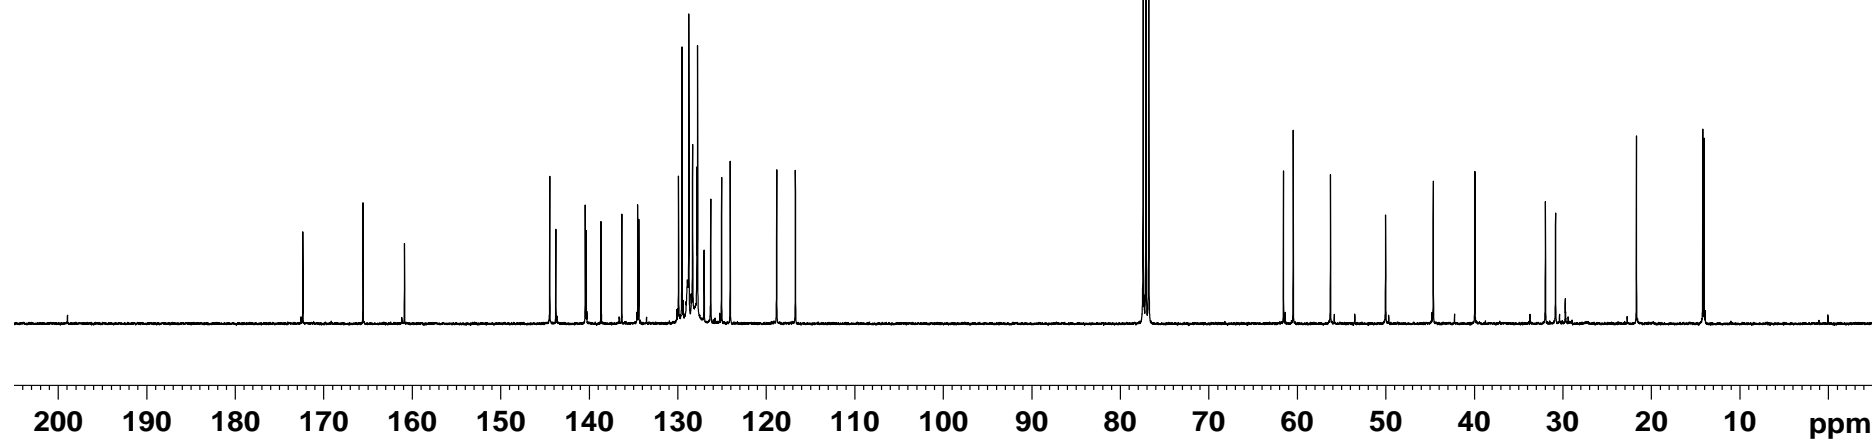

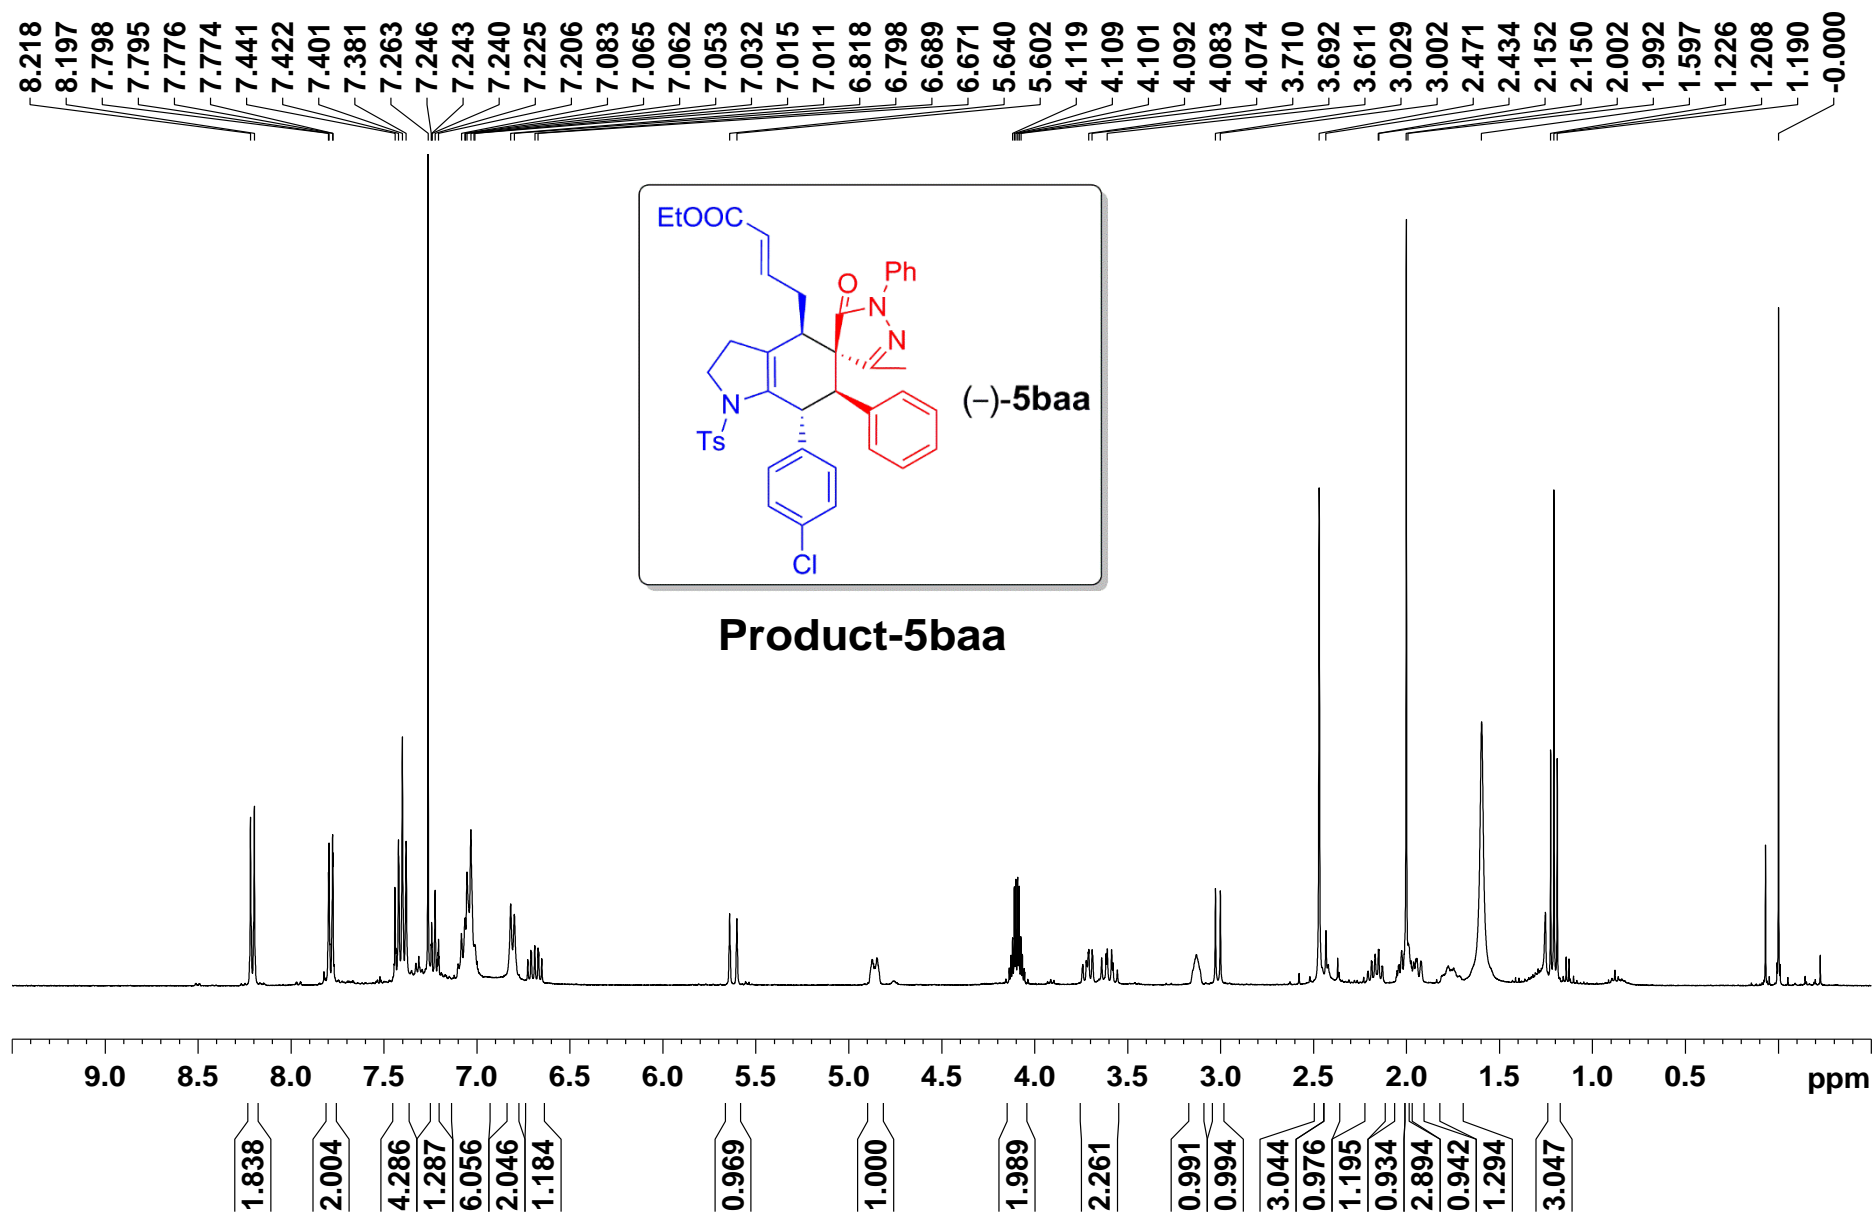



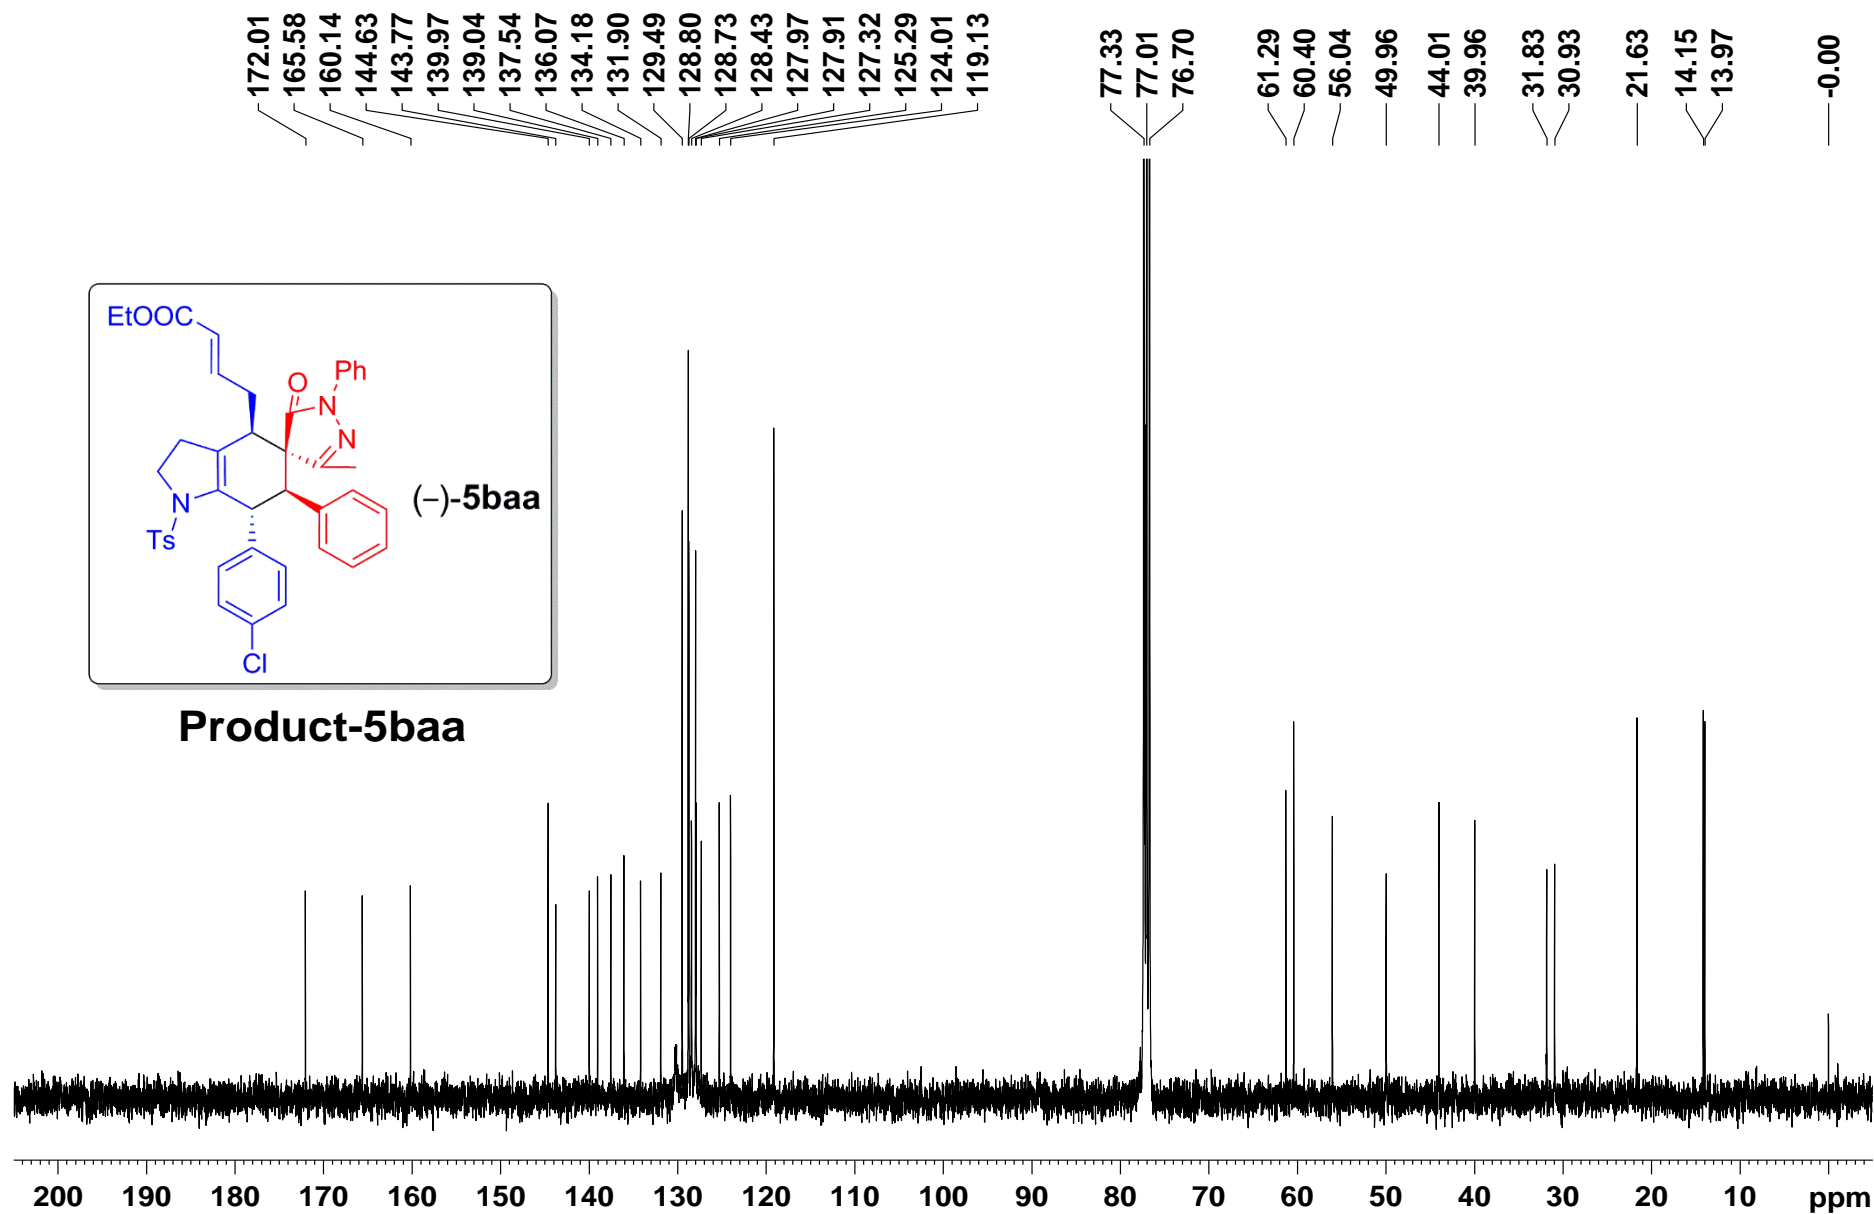

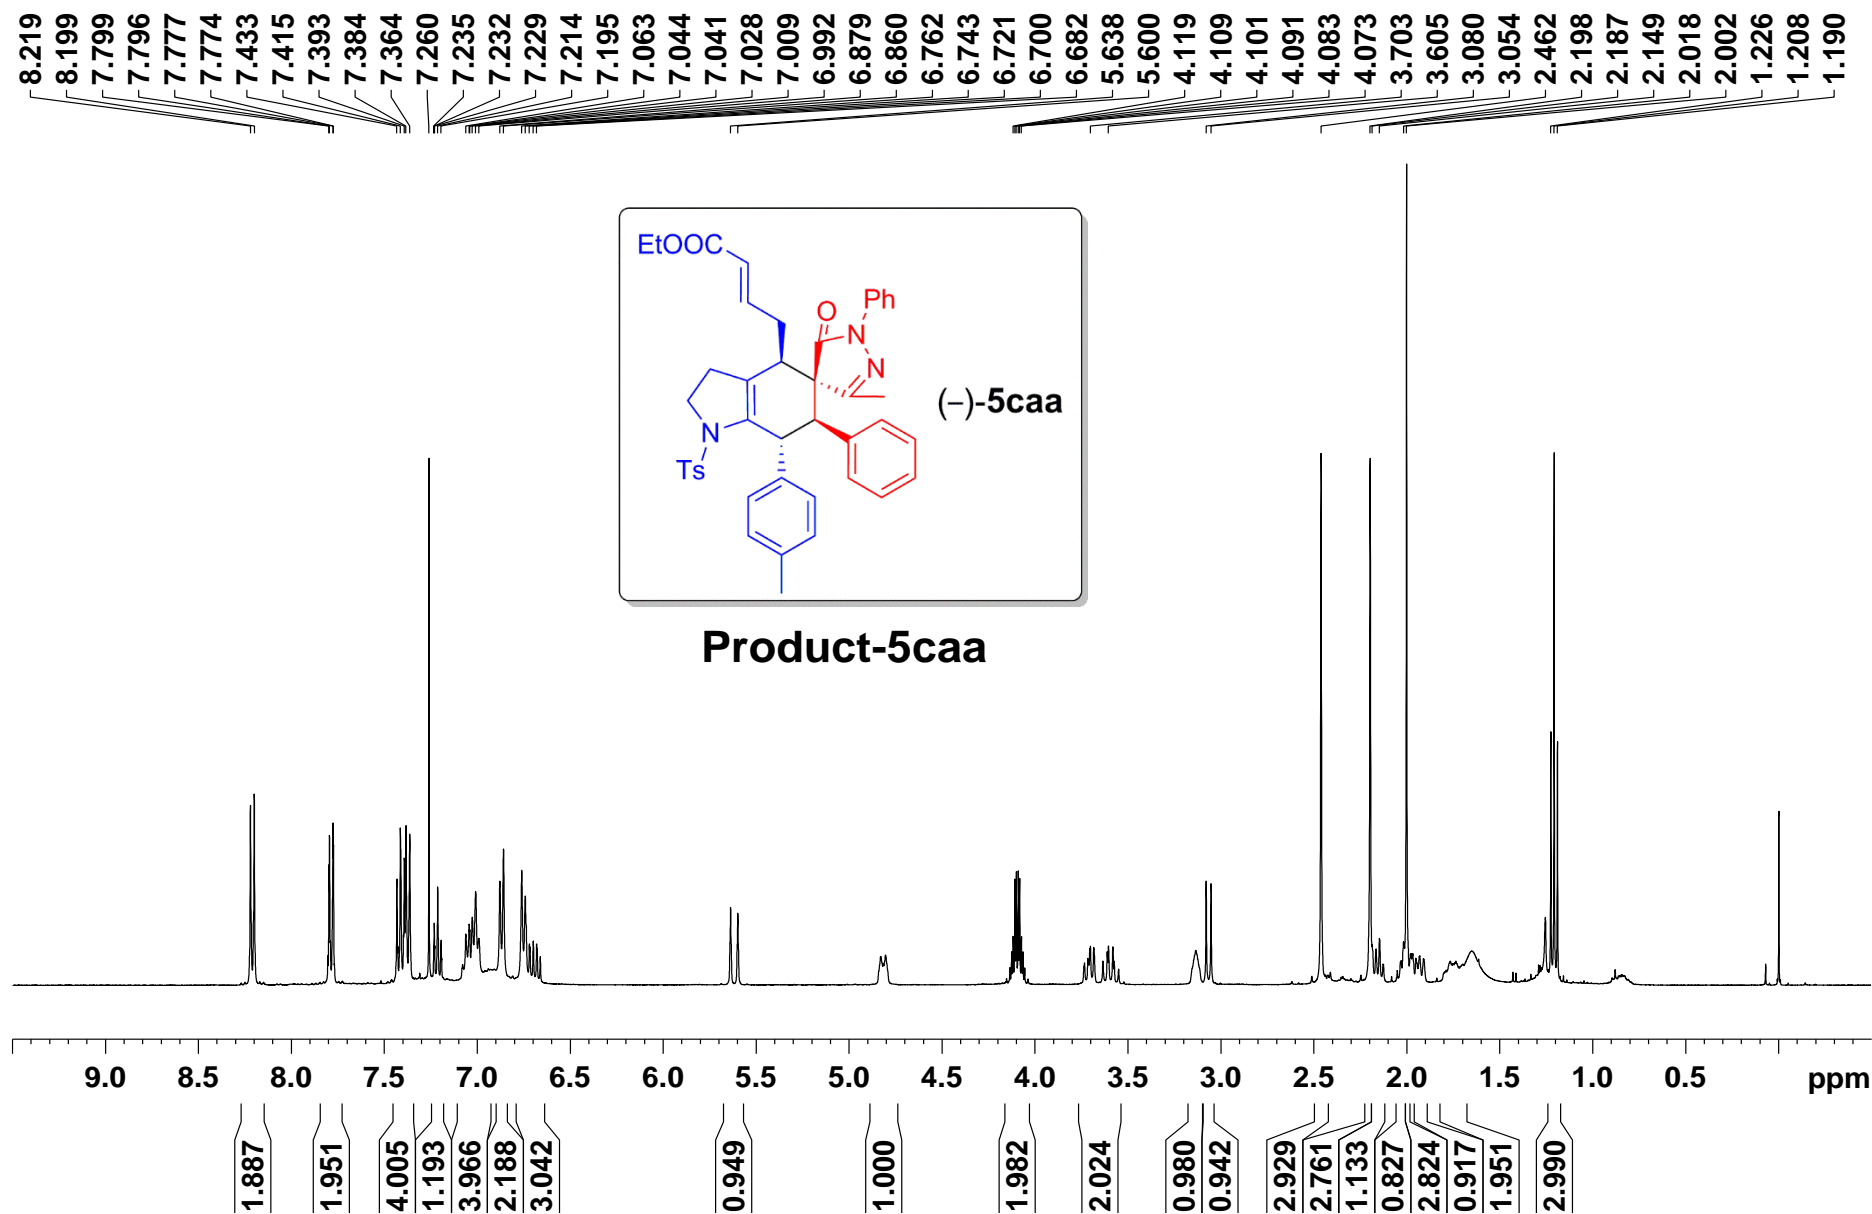

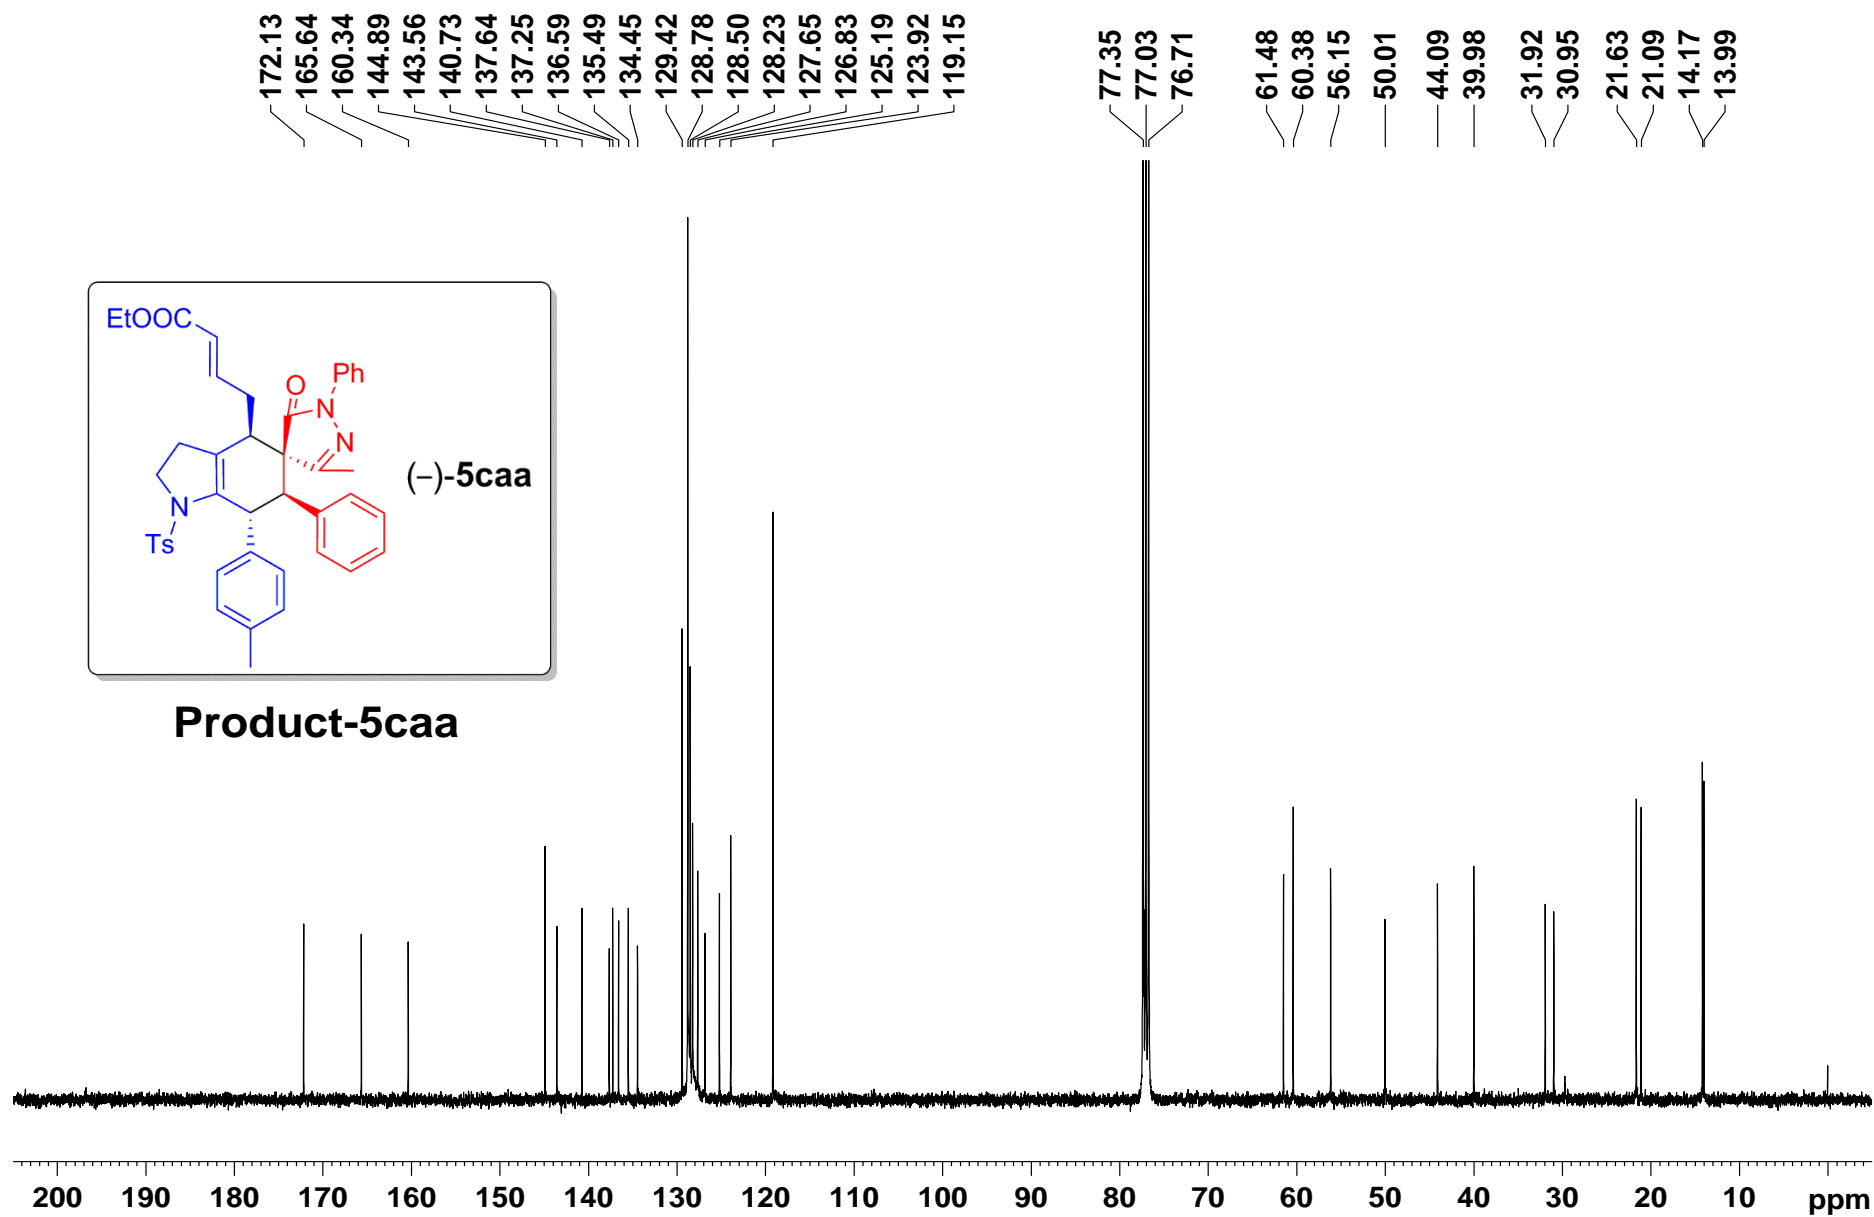

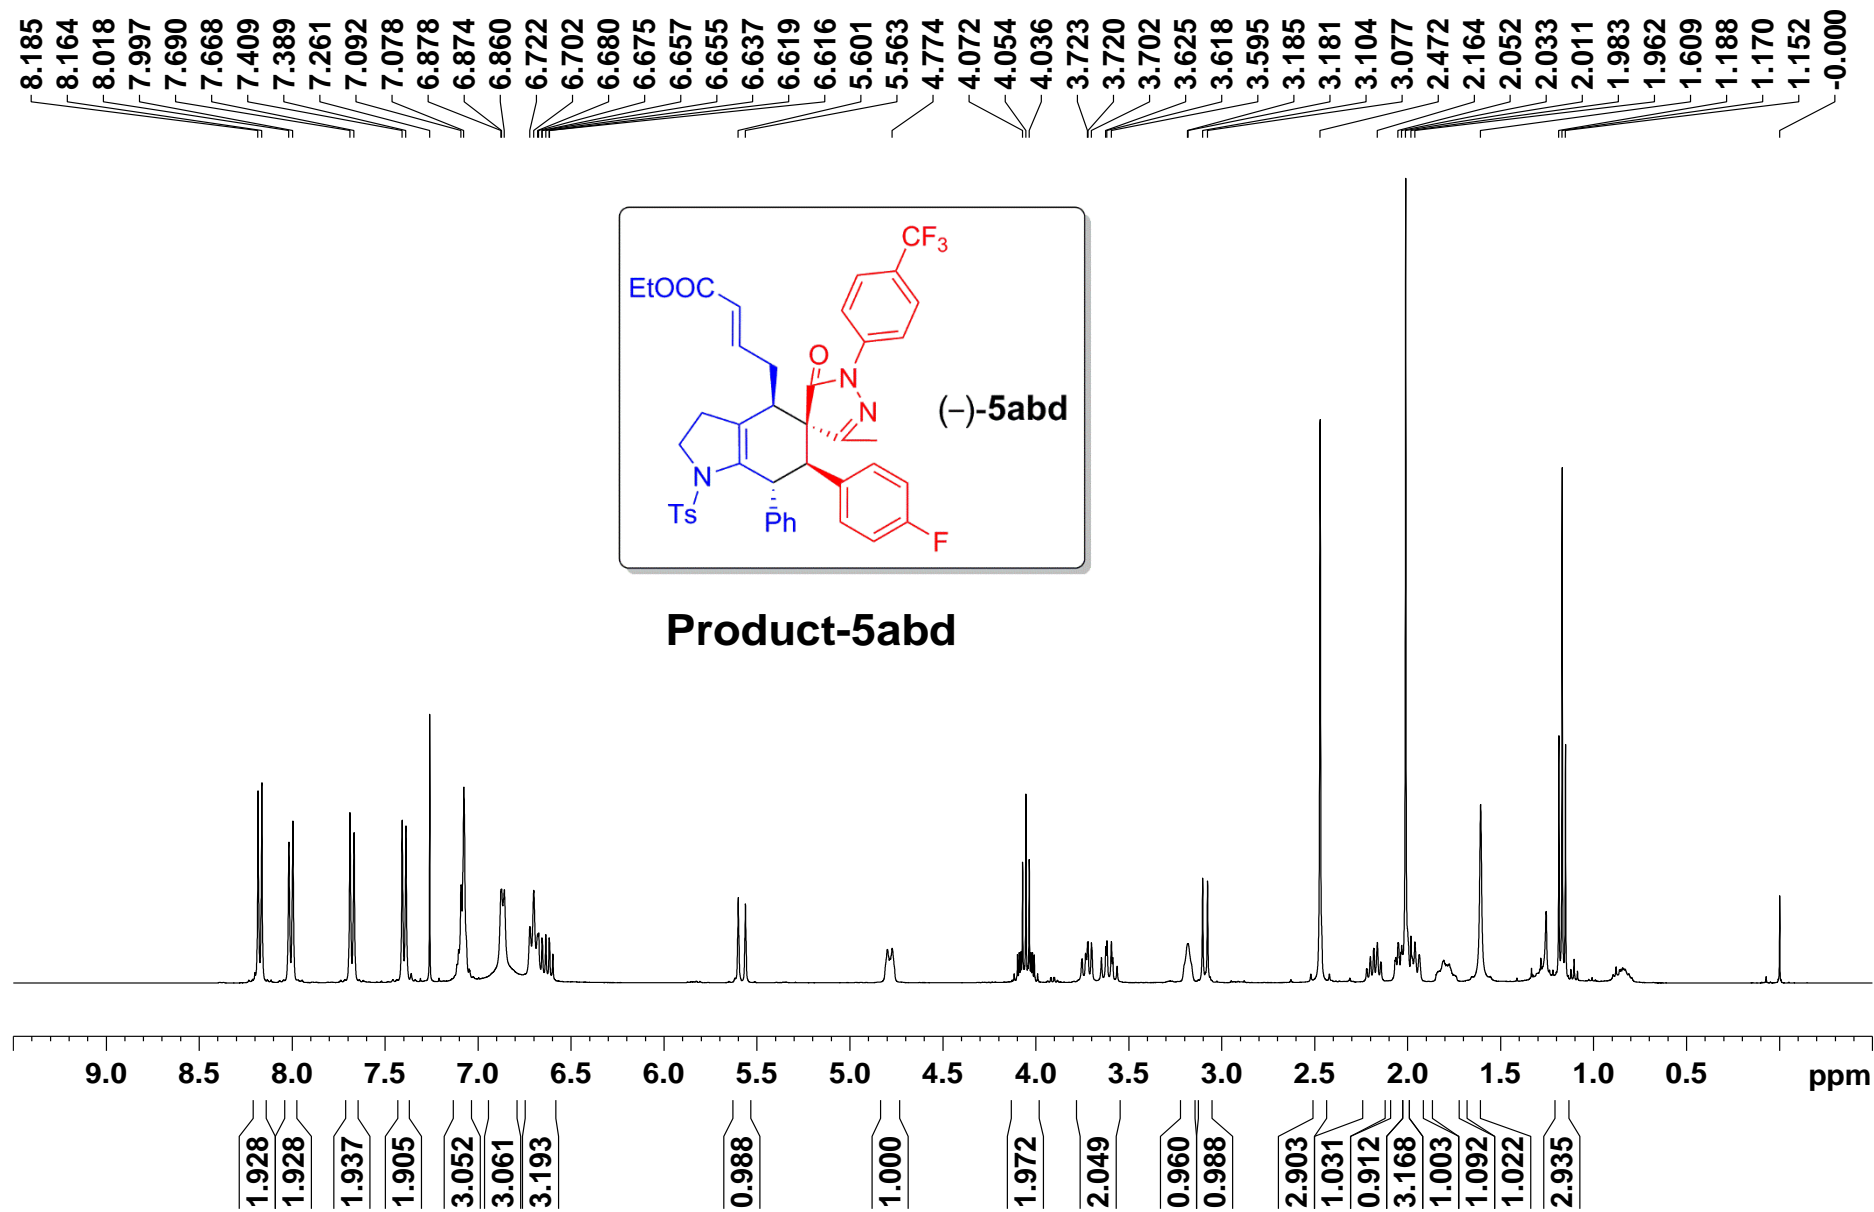

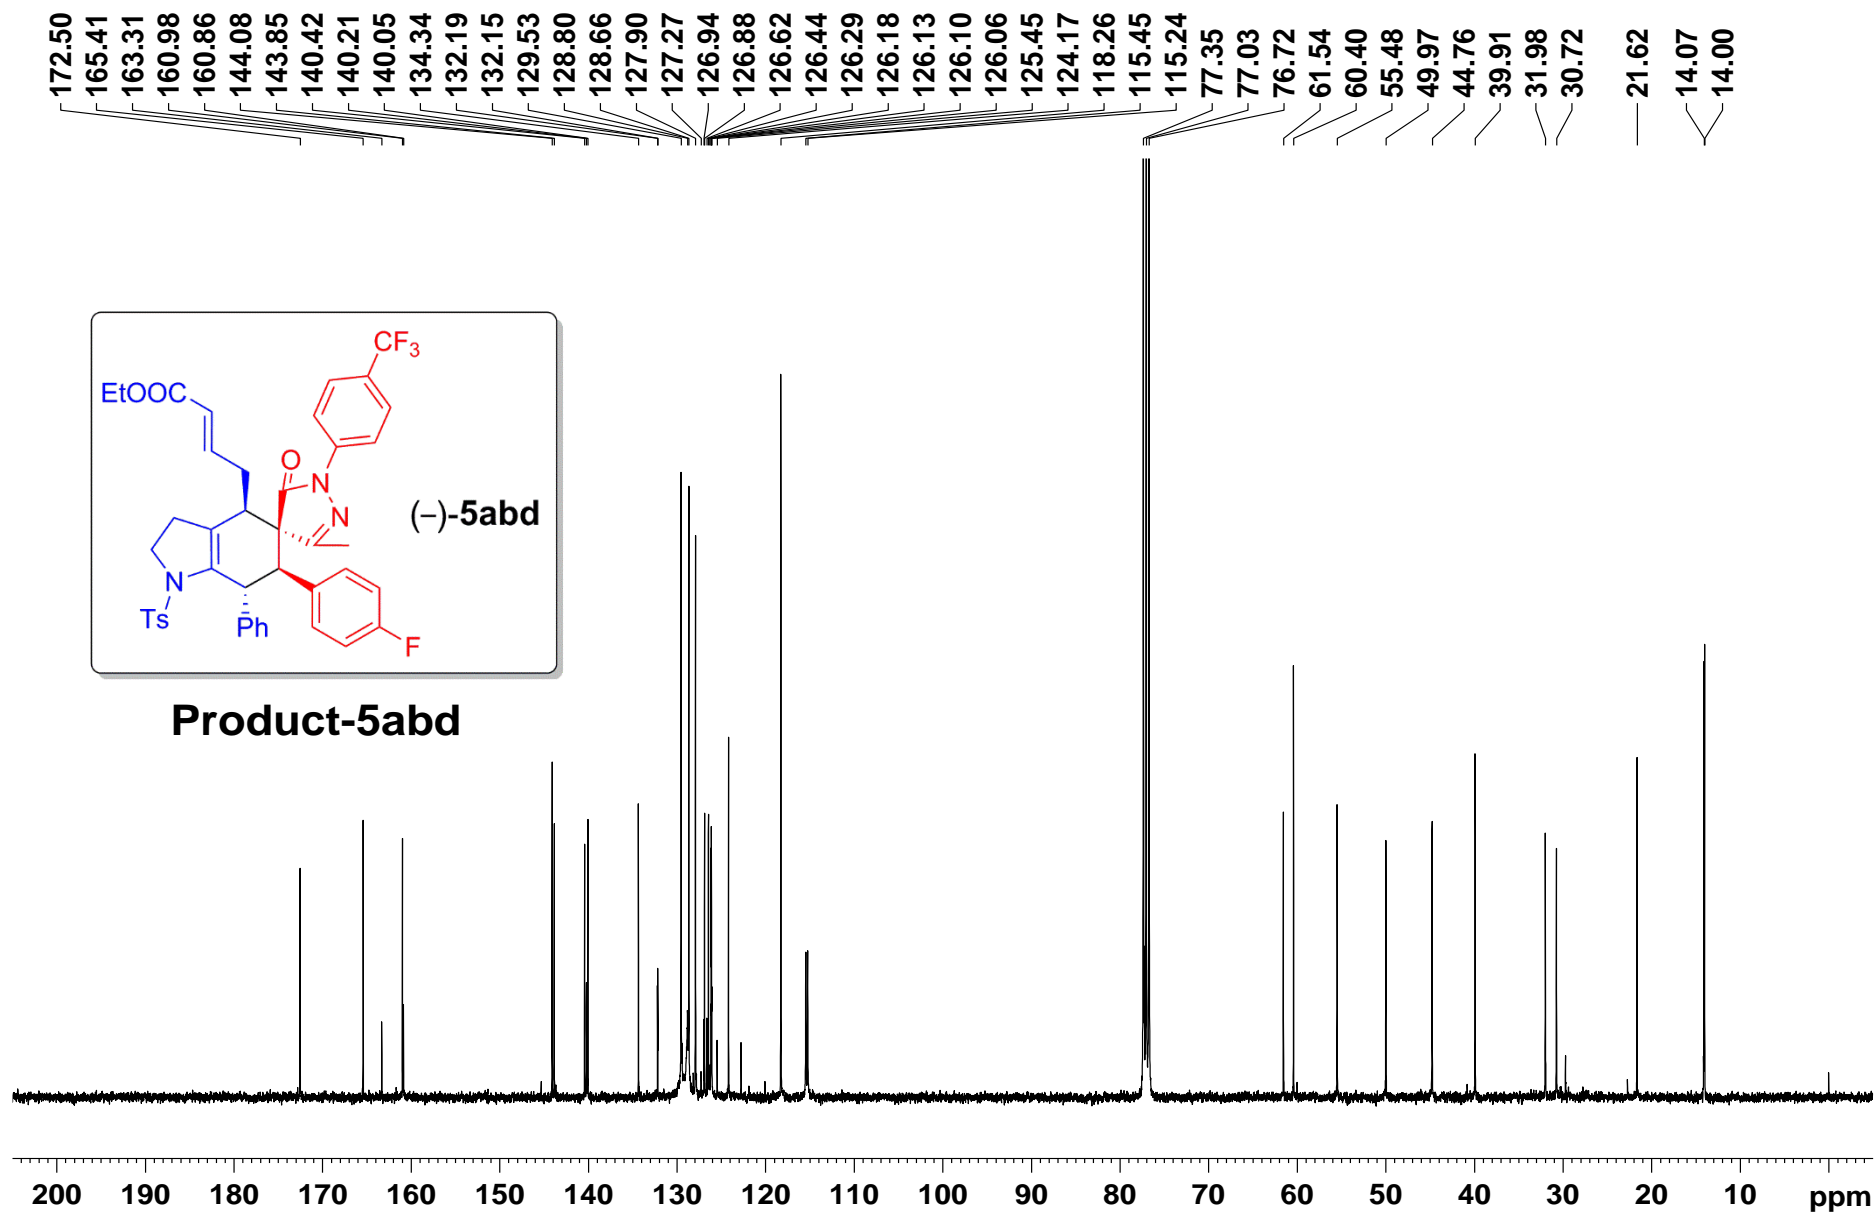

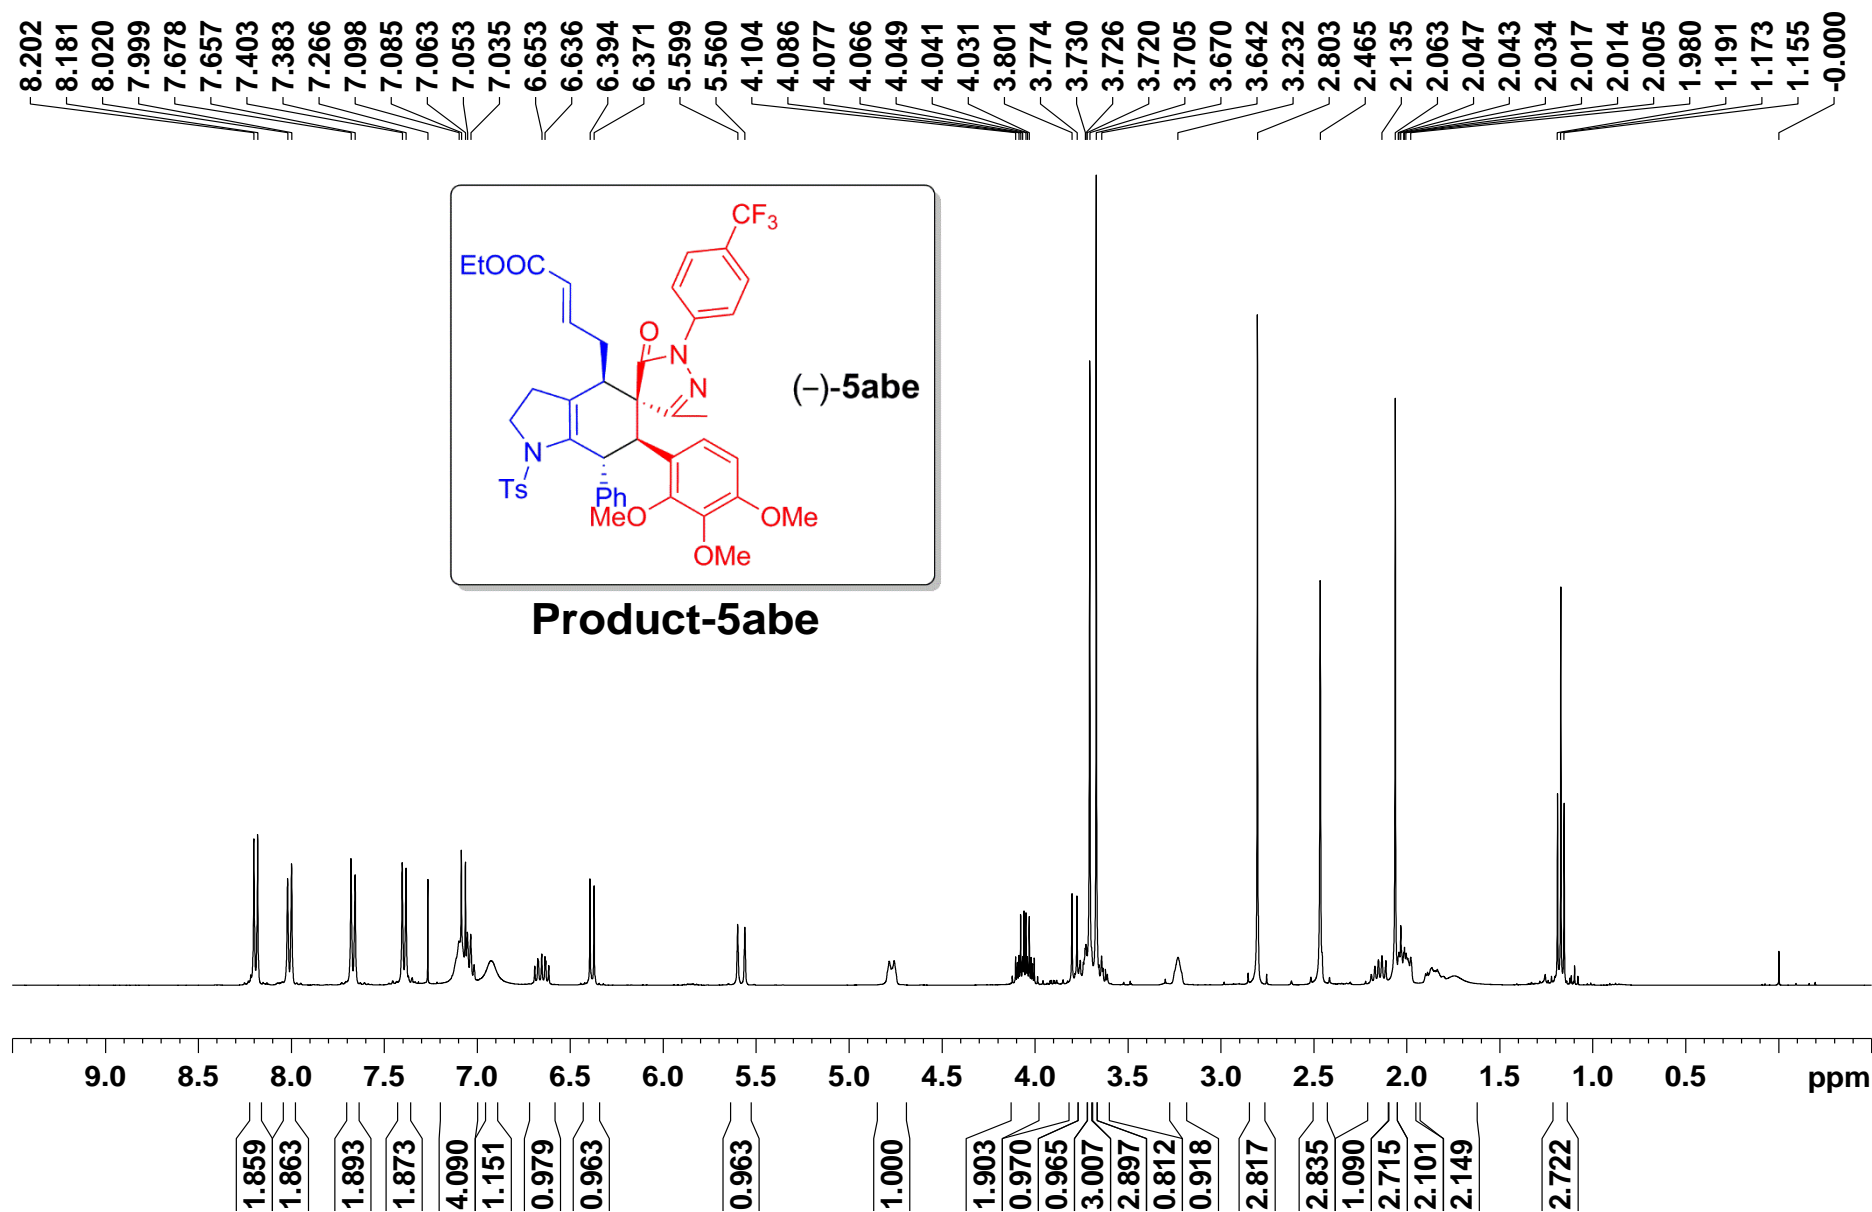

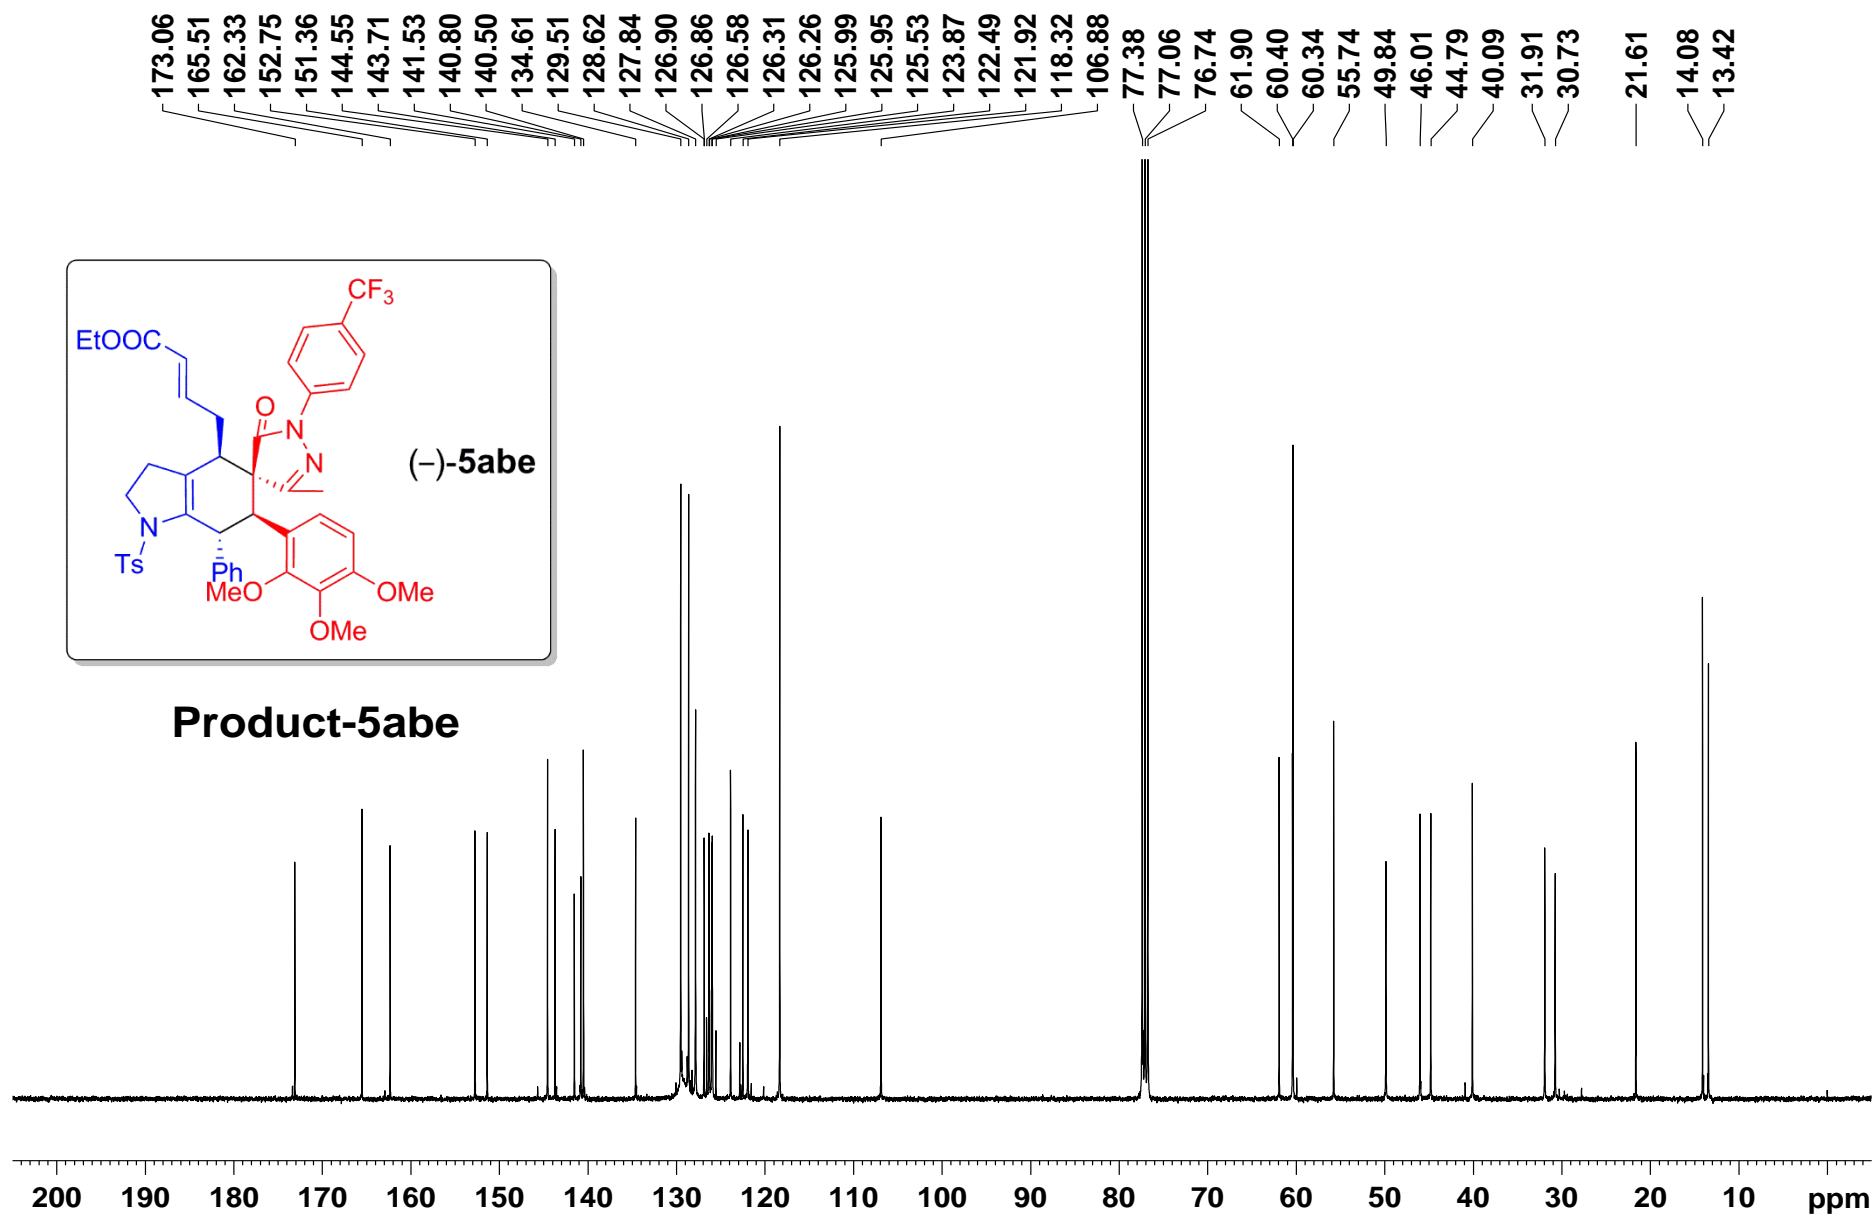

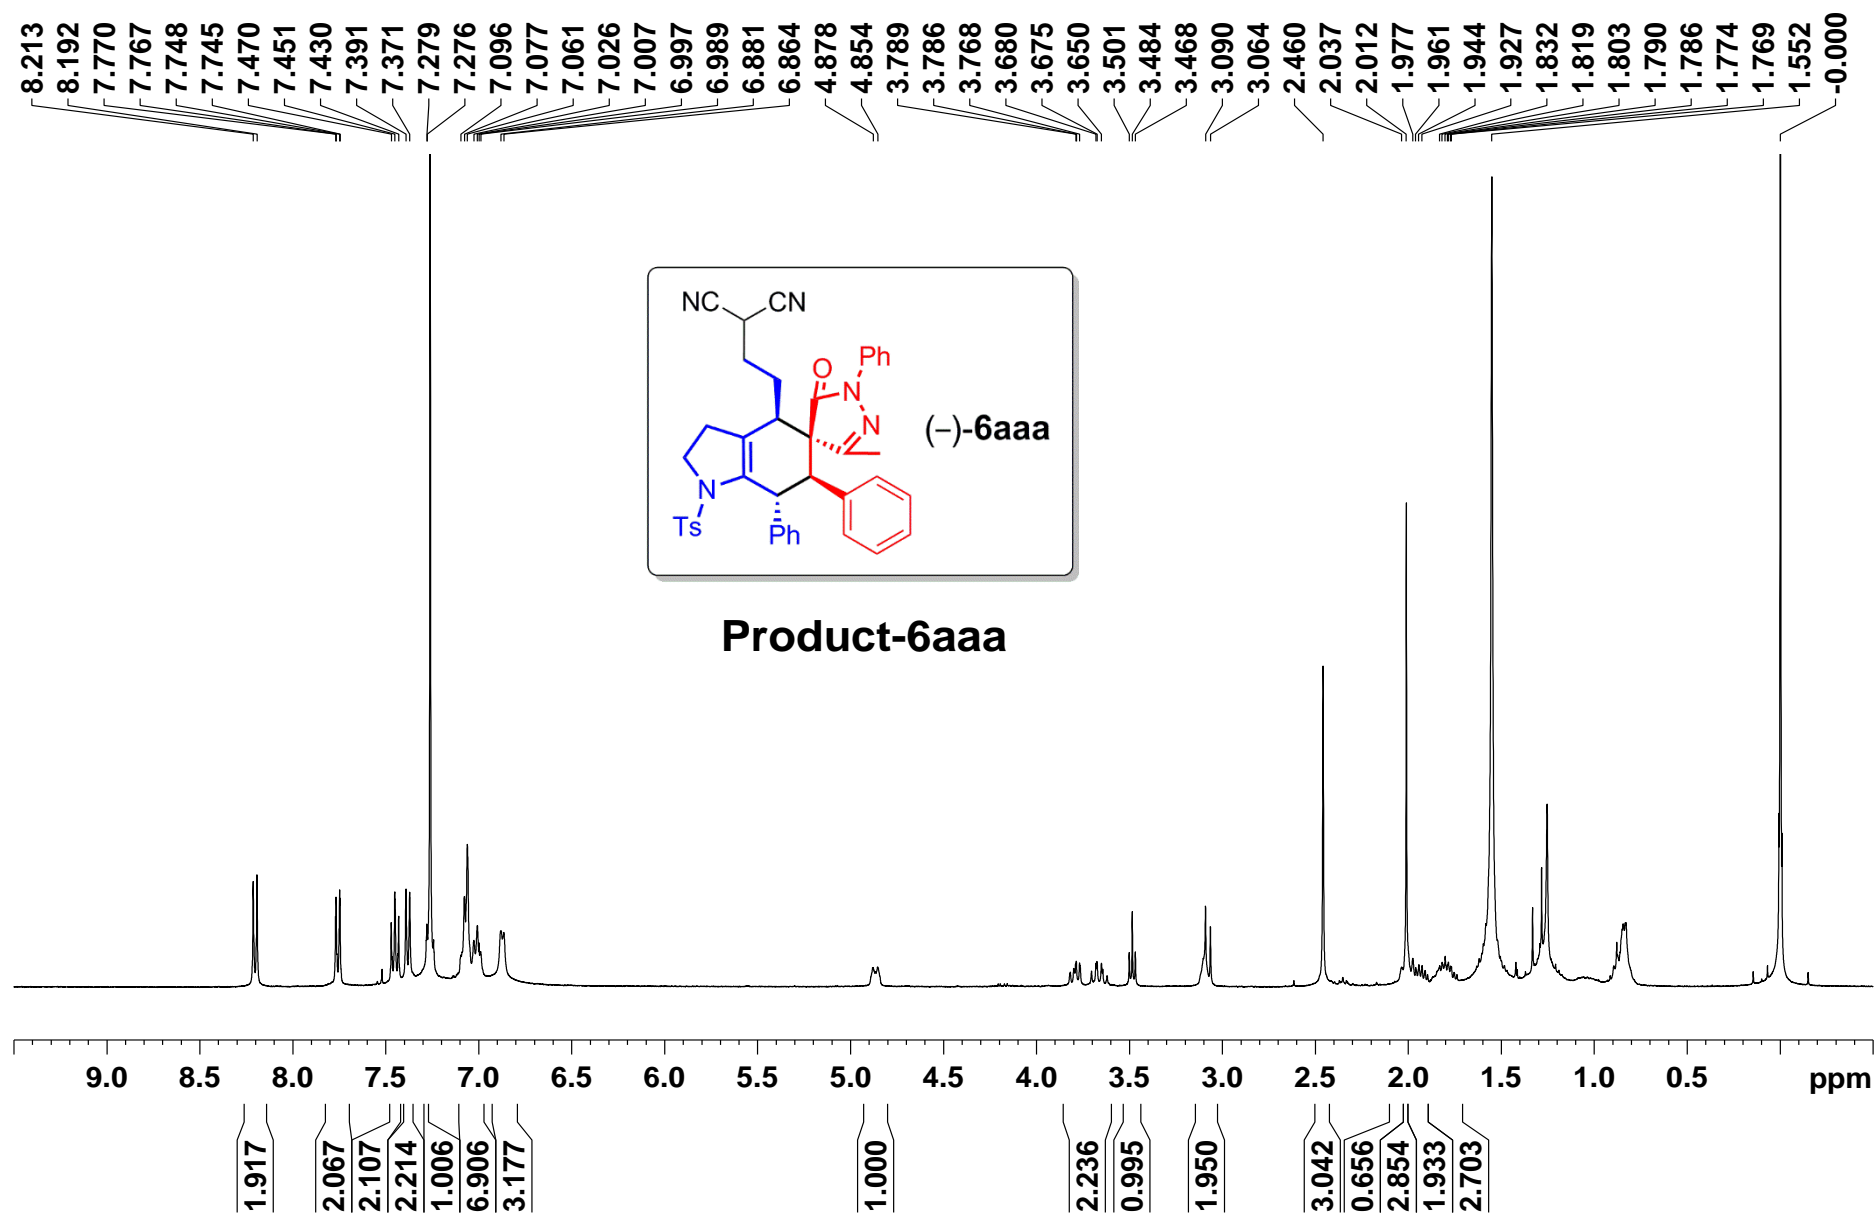



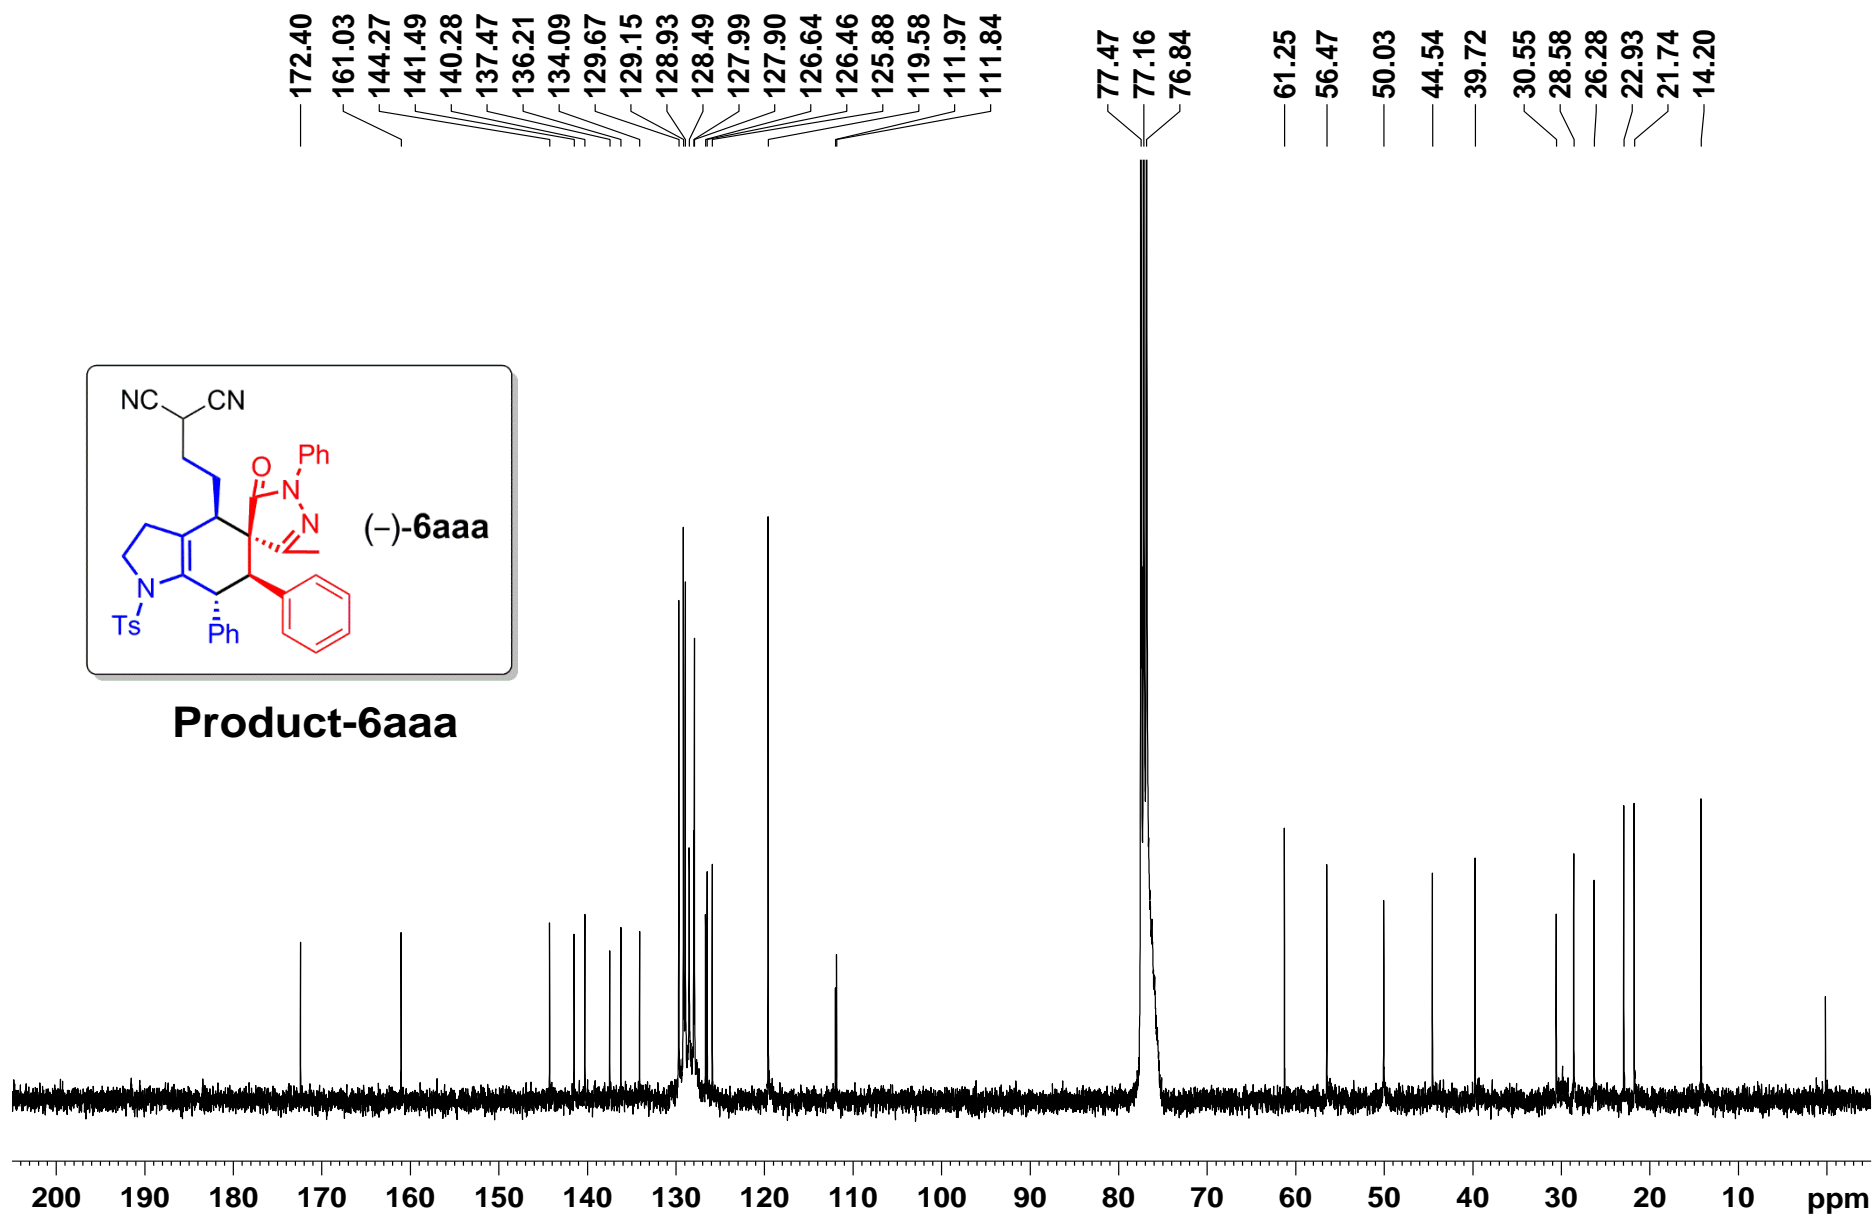

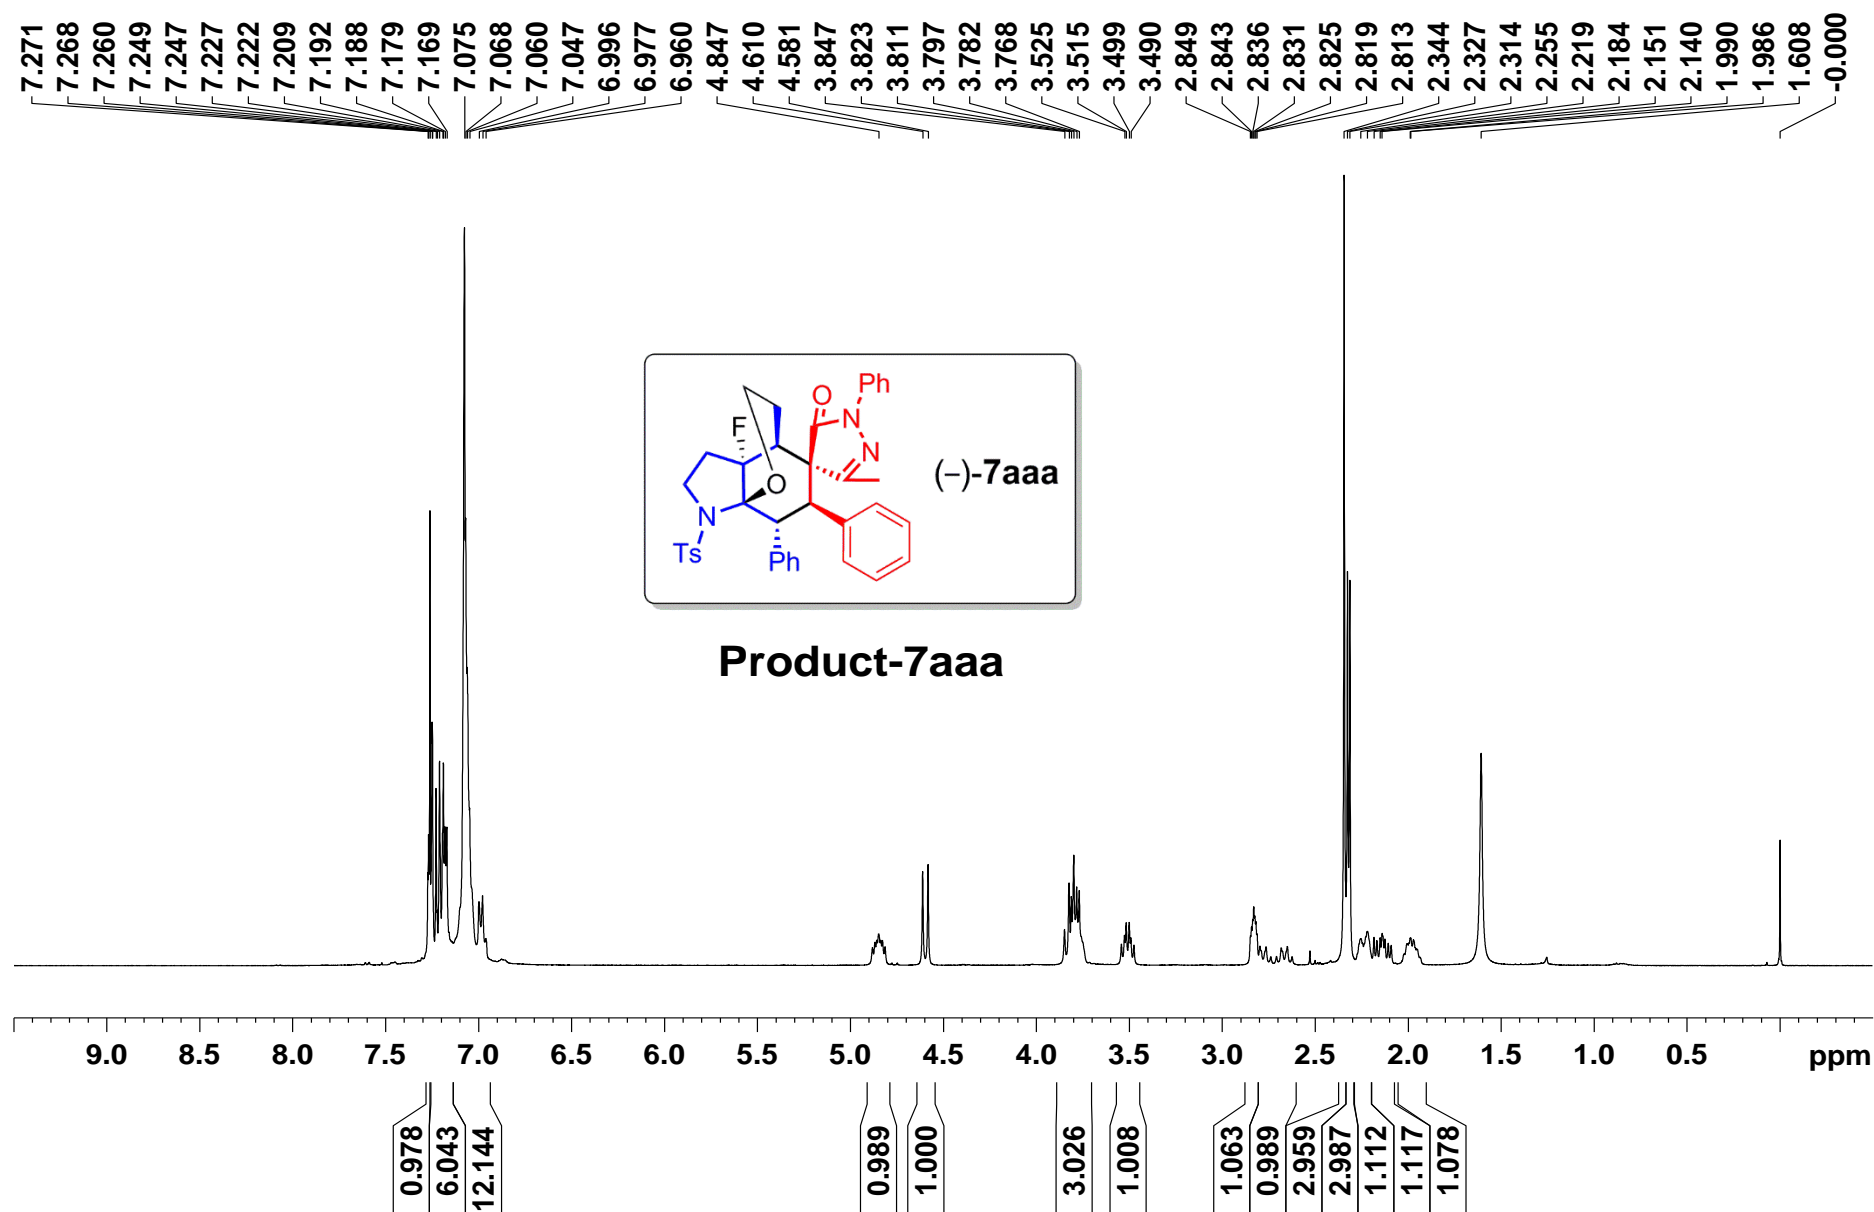

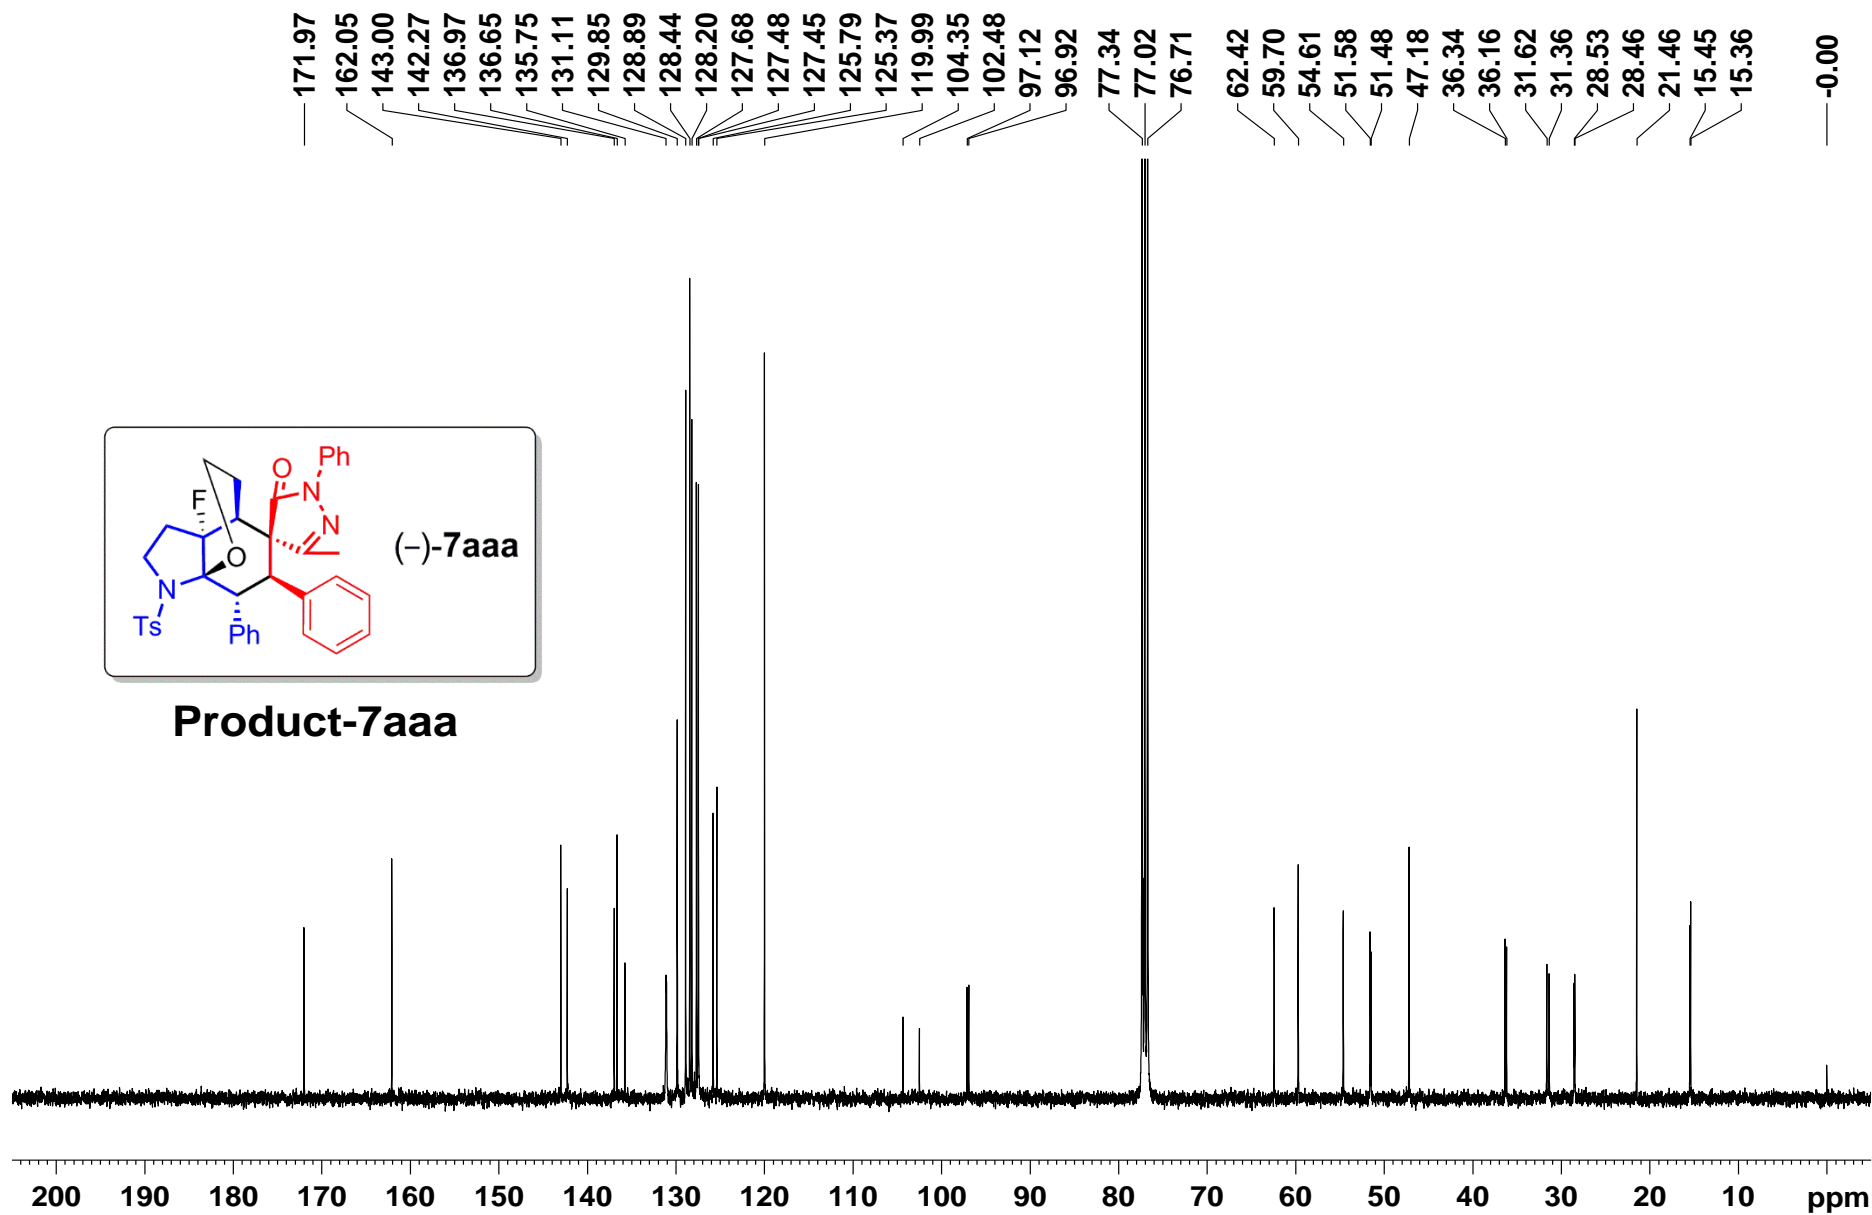

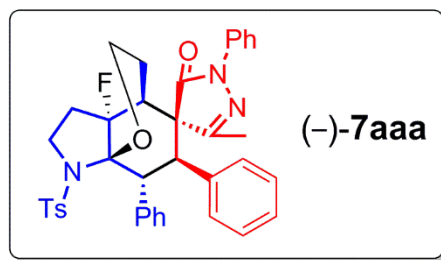

**Product-7aaa**

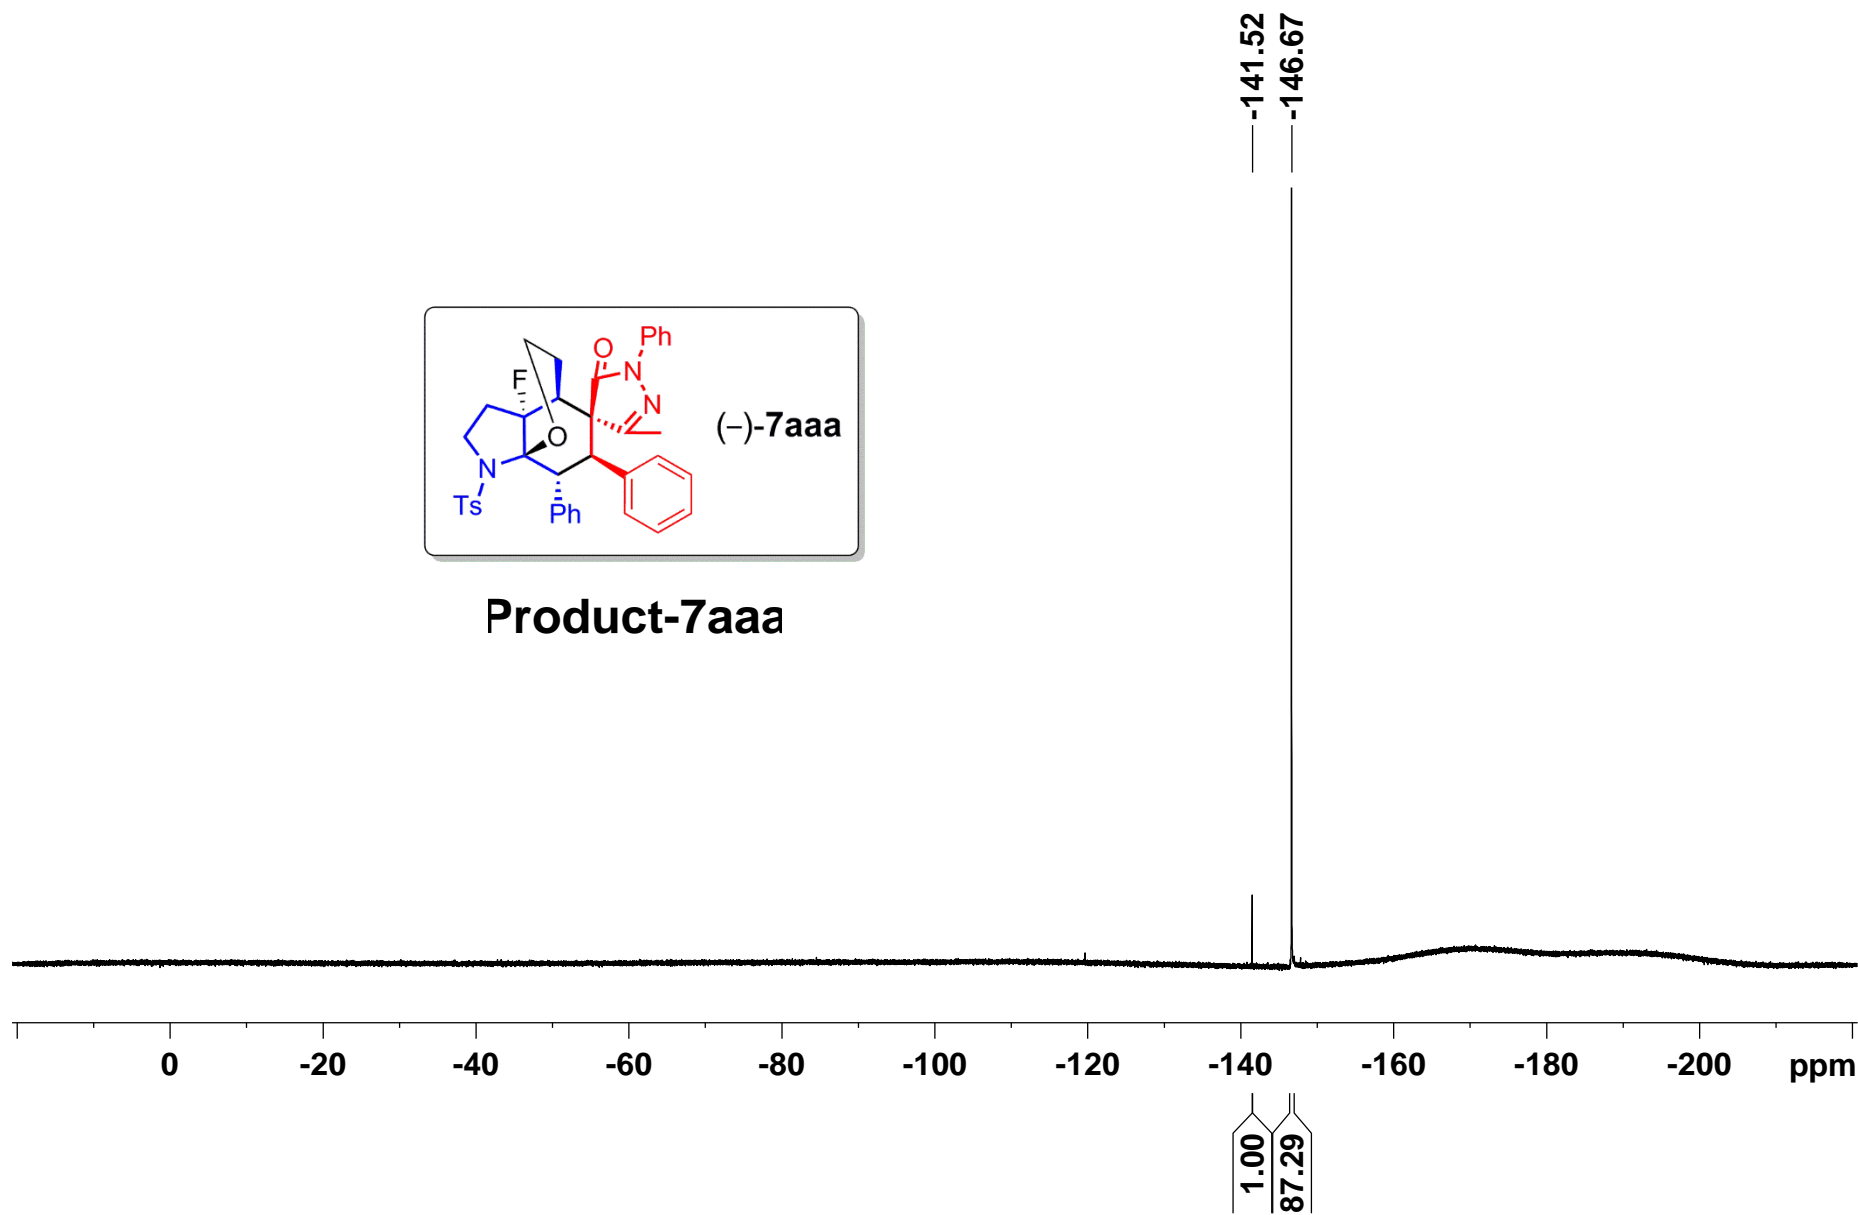

Supplement: d2ob01085b1.zip [file d2ob01085b1.zip]
