# Supplementary material for: Aminocatalytic asymmetric [4 + 2]-annulation to access functionally rich hexahydrospiroindole pyrazolones
Source: Royal Society of Chemistry journal article supplement (doi:10.1039/d2ob01085b), 2022-01-01
Supplement: d2ob01085b1.zip [file d2ob01085b1.zip]

# Supporting Information-III

## HPLC Data

### Aminocatalytic asymmetric [4+2]-annulation to access functionally rich hexahydrospiroindole pyrazolones

Madavi S. Prasad,\* Murugesan Sivaprakash, and A. Palanichamy

*Asymmetric Synthesis and Catalysis Laboratory, Department of Chemistry, Central University of Tamil Nadu, Thiruvavur, 610 005, India*

[shivaprasad@cutn.ac.in](mailto:shivaprasad@cutn.ac.in) and [shivacutn@gmail.com](mailto:shivacutn@gmail.com)

#### General Information:

The enantiomeric excess (*ee*) of the [4+2]-annulation adducts **4**, **5** and **7** were determined by chiral stationary phase HPLC using a Daicel Chiralpak IA, Chiralpak IC, and hexane/ethyl acetate as the eluent. Retention times and solvent ratios are indicated in the respective entries.

# HPLC data of racemic **4aaa**

MSP-I-158-2 E:\...\Full Paper Data\Spectral data\HPLC\Raw file\Optimization\Paper code\Optimization\Racemic.lcd

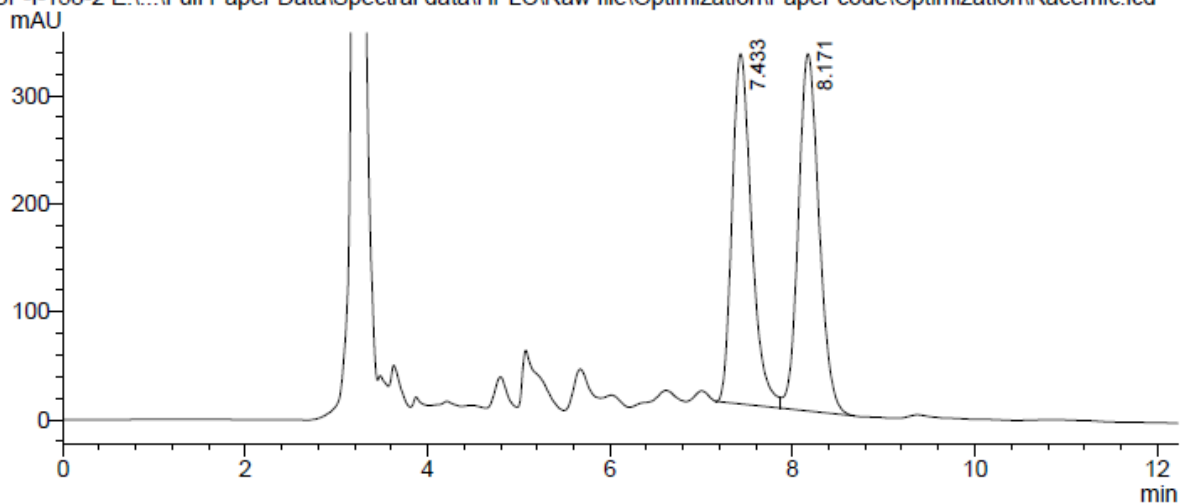

PDA Ch1 254nm

| Peak # | Ret. Time (min) | Area     | Height | Area%   |
|--------|-----------------|----------|--------|---------|
| 1      | 7.433           | 4813827  | 324273 | 48.044  |
| 2      | 8.171           | 5205694  | 330868 | 51.956  |
| Total  |                 | 10019522 | 655141 | 100.000 |

## HPLC data of chiral **5aaa**: 96% ee

MSP-III-61 E:\...\Full Paper Data\Spectral data\HPLC\Raw file\Optimization\Paper code\Optimization\2.lcd

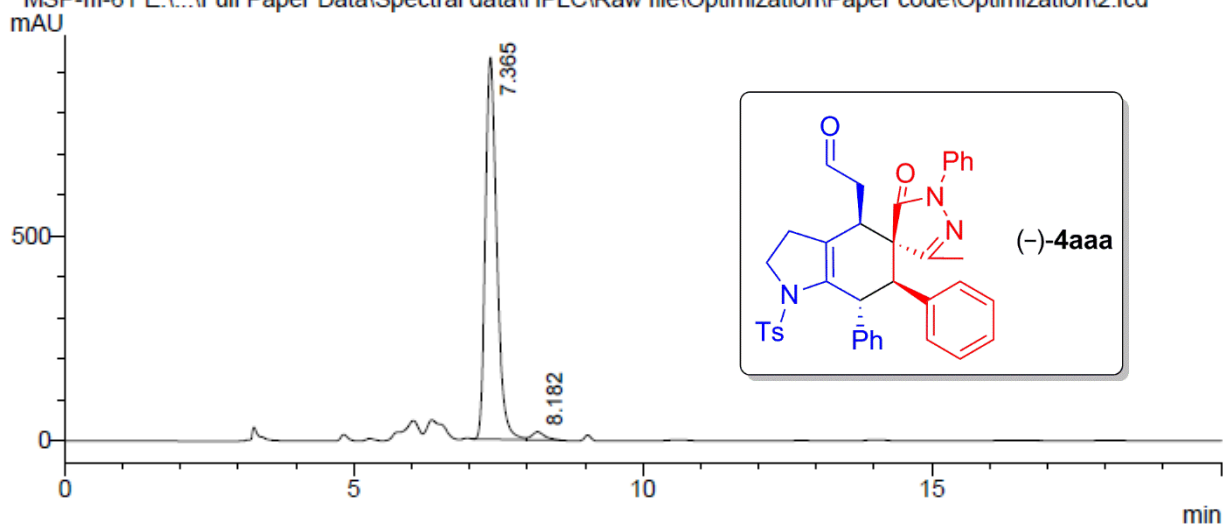

PDA Ch1 254nm

| Peak # | Ret. Time (min) | Area     | Height | Area%   |
|--------|-----------------|----------|--------|---------|
| 1      | 7.365           | 12779440 | 930806 | 97.732  |
| 2      | 8.182           | 296549   | 19314  | 2.268   |
| Total  |                 | 13075989 | 950120 | 100.000 |

# HPLC data of racemic **5aaa**

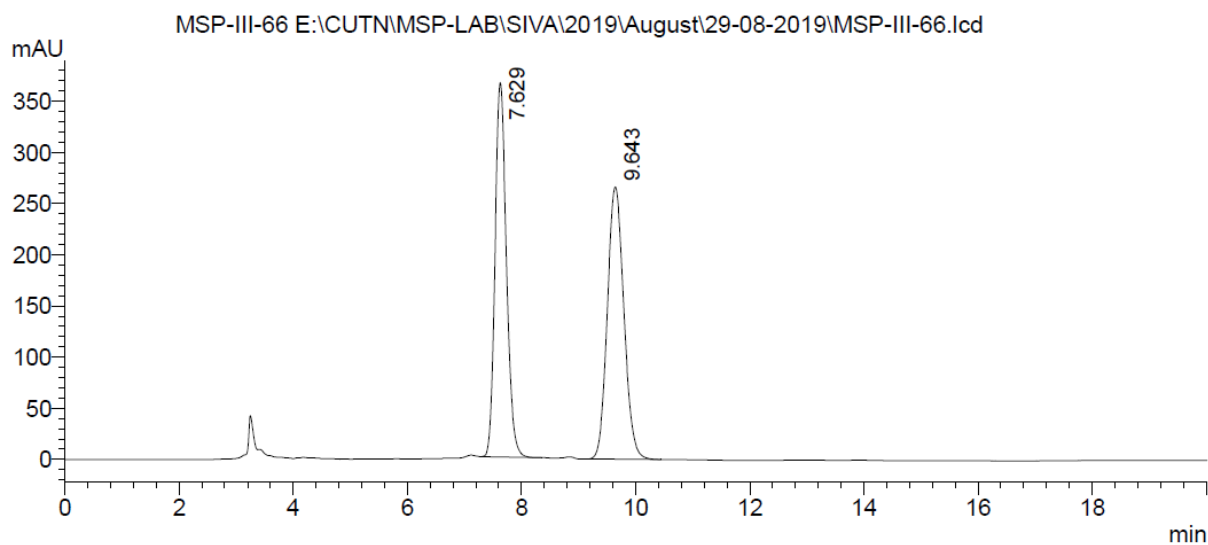

PDA Ch1 254nm

| Peak # | Ret. Time (min) | Area     | Height | Area%   |
|--------|-----------------|----------|--------|---------|
| 1      | 7.629           | 5053933  | 365789 | 48.554  |
| 2      | 9.643           | 5354880  | 266145 | 51.446  |
| Total  |                 | 10408813 | 631934 | 100.000 |

# HPLC data of chiral **5aaa**: 96% ee

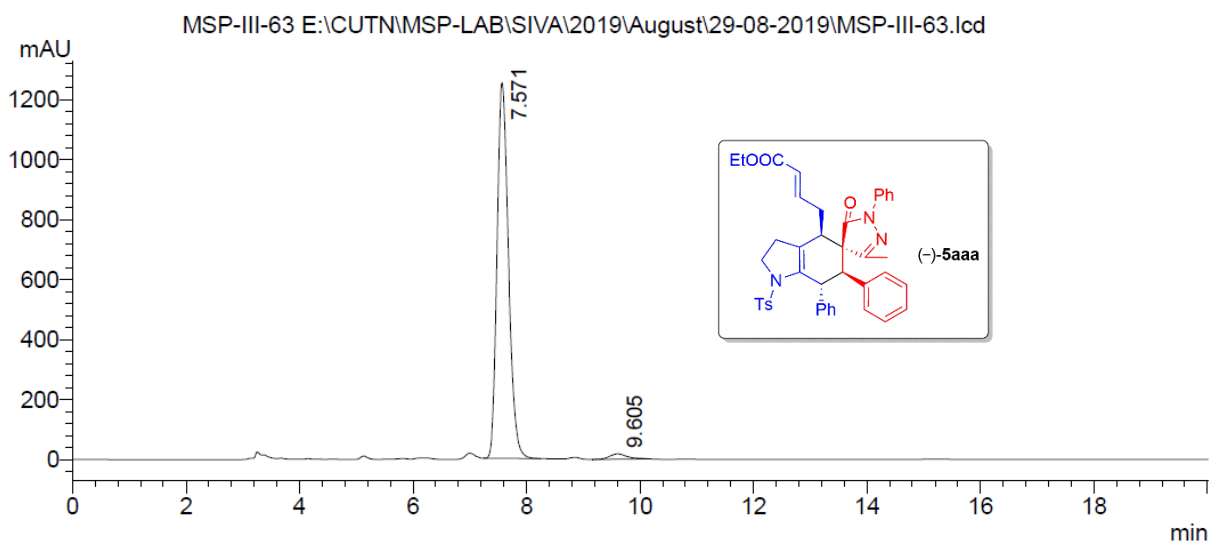

PDA Ch1 254nm

| Peak # | Ret. Time (min) | Area     | Height  | Area%   |
|--------|-----------------|----------|---------|---------|
| 1      | 7.571           | 17556609 | 1252706 | 97.922  |
| 2      | 9.605           | 372635   | 17366   | 2.078   |
| Total  |                 | 17929244 | 1270072 | 100.000 |

# HPLC data of racemic **5aab**

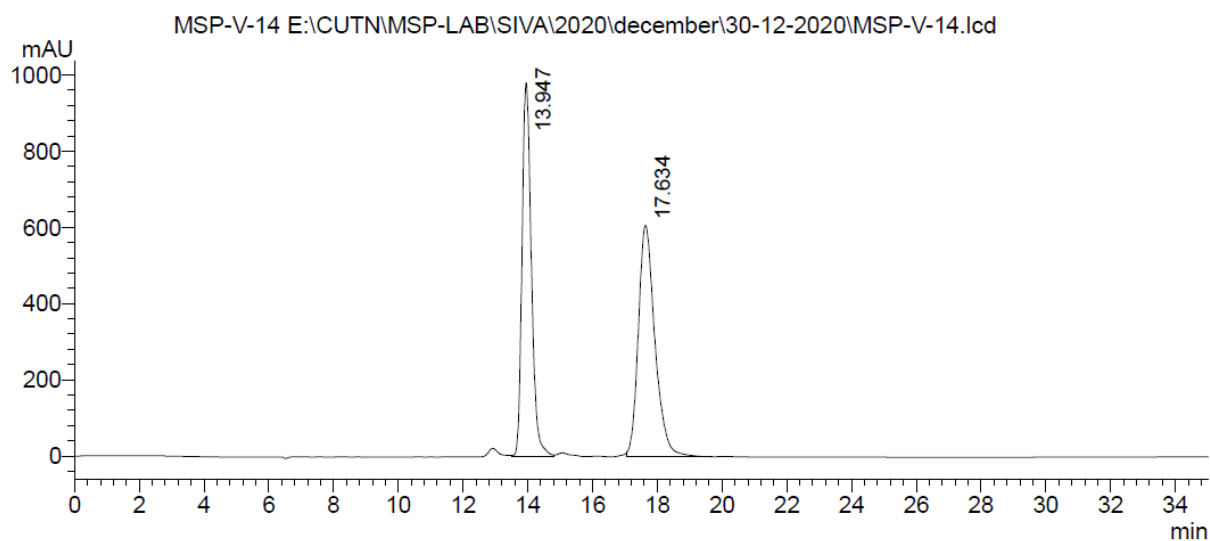

PDA Ch1 254nm

| Peak # | Ret. Time (min) | Area     | Height  | Area%   |
|--------|-----------------|----------|---------|---------|
| 1      | 13.947          | 19729374 | 981892  | 47.616  |
| 2      | 17.634          | 21704817 | 607931  | 52.384  |
| Total  |                 | 41434191 | 1589823 | 100.000 |

## HPLC data of chiral **5aab**: 97% *ee*

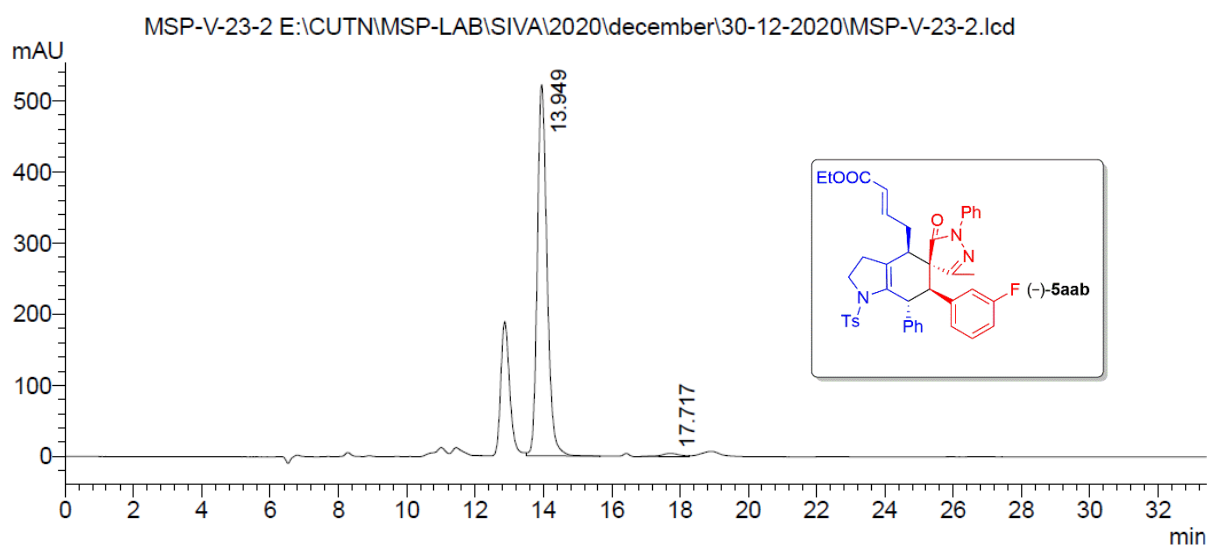

PDA Ch1 254nm

| Peak # | Ret. Time (min) | Area     | Height | Area%   |
|--------|-----------------|----------|--------|---------|
| 1      | 13.949          | 10329690 | 521906 | 98.486  |
| 2      | 17.717          | 158805   | 4336   | 1.514   |
| Total  |                 | 10488495 | 526242 | 100.000 |

# HPLC data of racemic **5aac**

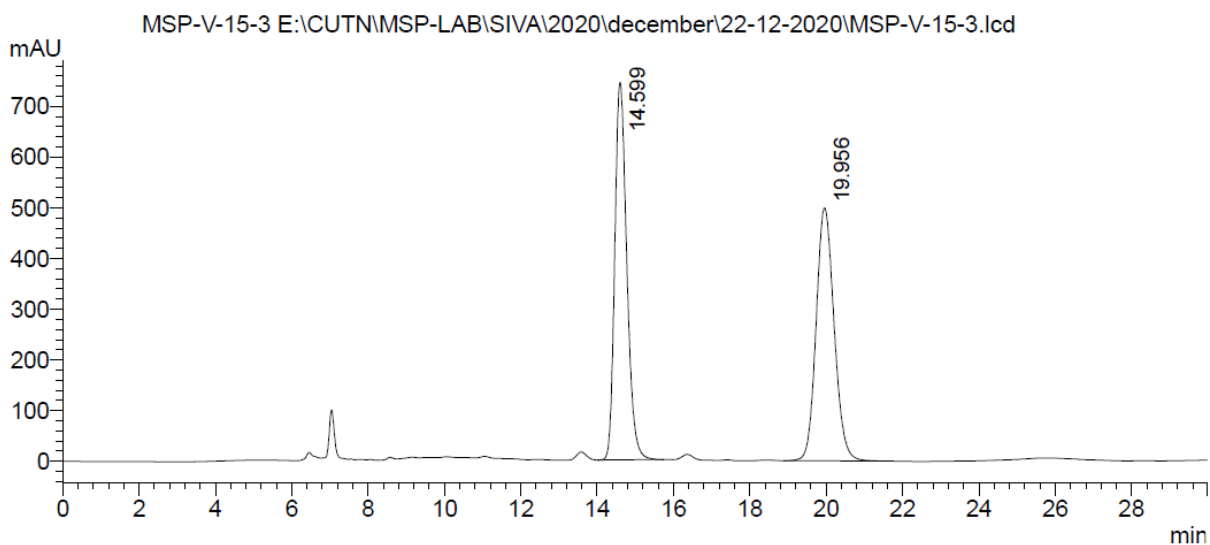

PDA Ch1 254nm

| Peak # | Ret. Time (min) | Area     | Height  | Area%   |
|--------|-----------------|----------|---------|---------|
| 1      | 14.599          | 16239011 | 744237  | 49.856  |
| 2      | 19.956          | 16332666 | 498719  | 50.144  |
| Total  |                 | 32571677 | 1242956 | 100.000 |

# HPLC data of chiral **5aac**: 96% *ee*

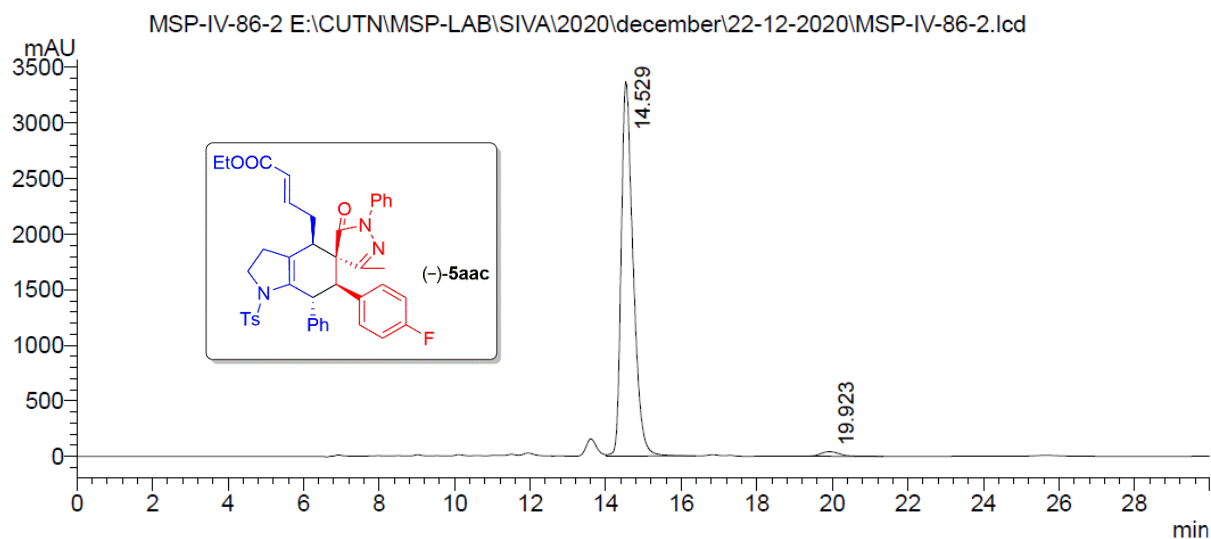

PDA Ch1 254nm

| Peak # | Ret. Time (min) | Area     | Height  | Area%   |
|--------|-----------------|----------|---------|---------|
| 1      | 14.529          | 73835656 | 3369805 | 98.021  |
| 2      | 19.923          | 1490459  | 43280   | 1.979   |
| Total  |                 | 75326114 | 3413085 | 100.000 |

### HPLC data of racemic **5aad**

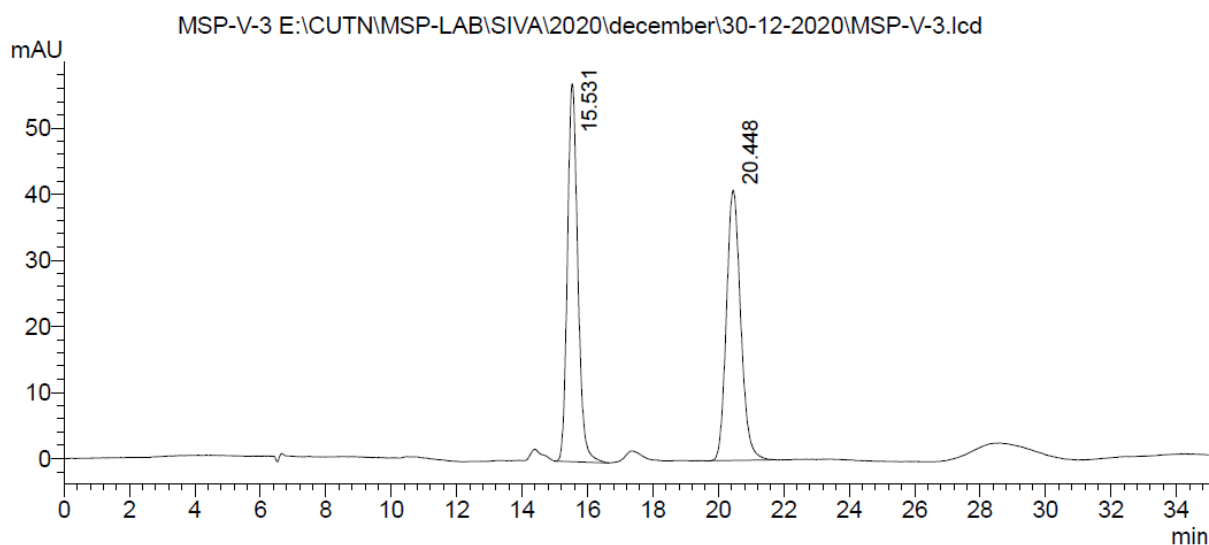

PDA Ch1 254nm

| Peak # | Ret. Time (min) | Area    | Height | Area%   |
|--------|-----------------|---------|--------|---------|
| 1      | 15.531          | 1261348 | 57210  | 50.409  |
| 2      | 20.448          | 1240894 | 40930  | 49.591  |
| Total  |                 | 2502242 | 98139  | 100.000 |

### HPLC data of chiral **5aad**: 97% *ee*

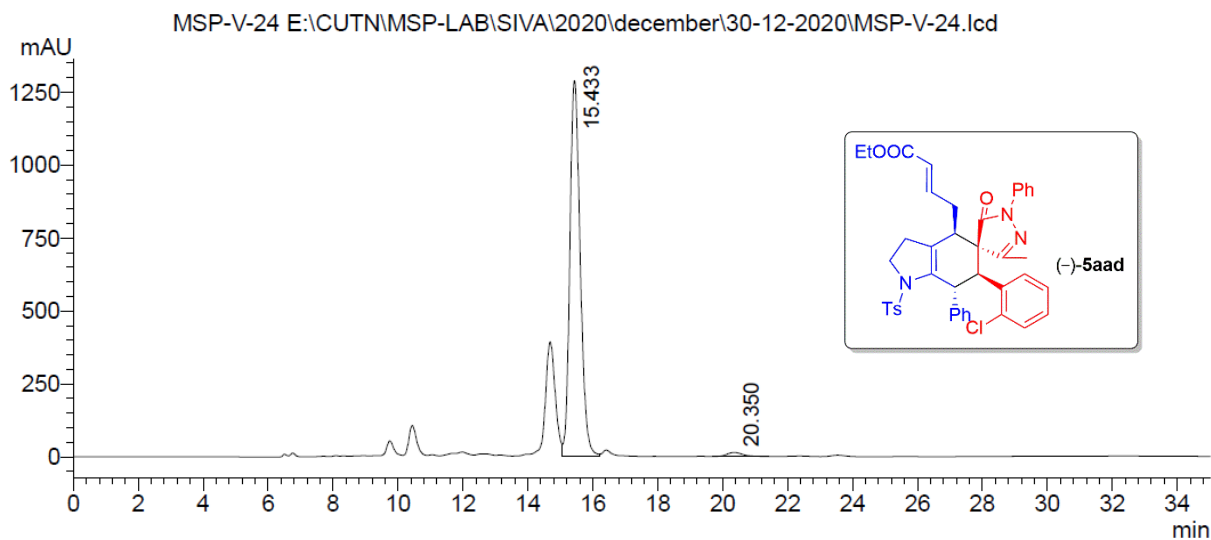

PDA Ch1 254nm

| Peak # | Ret. Time (min) | Area     | Height  | Area%   |
|--------|-----------------|----------|---------|---------|
| 1      | 15.433          | 28433563 | 1286973 | 98.348  |
| 2      | 20.350          | 477490   | 14187   | 1.652   |
| Total  |                 | 28911052 | 1301160 | 100.000 |

### HPLC data of racemic **5a***ae*

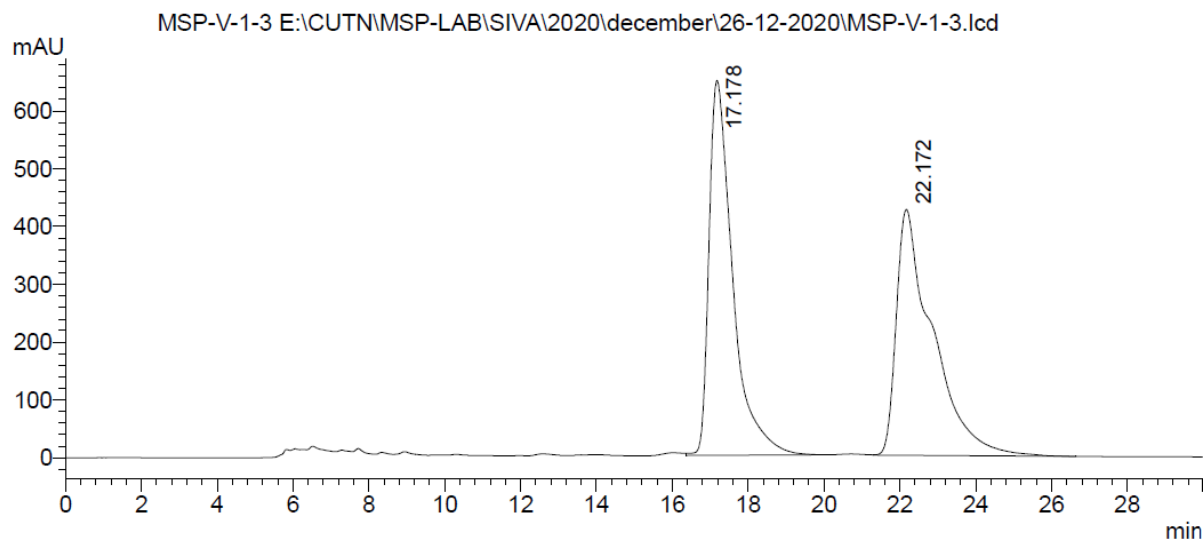

PDA Ch1 254nm

| Peak # | Ret. Time (min) | Area     | Height  | Area%   |
|--------|-----------------|----------|---------|---------|
| 1      | 17.178          | 28131441 | 648324  | 49.850  |
| 2      | 22.172          | 28301035 | 424796  | 50.150  |
| Total  |                 | 56432476 | 1073120 | 100.000 |

### HPLC data of chiral **5a***ae*: 96% *ee*

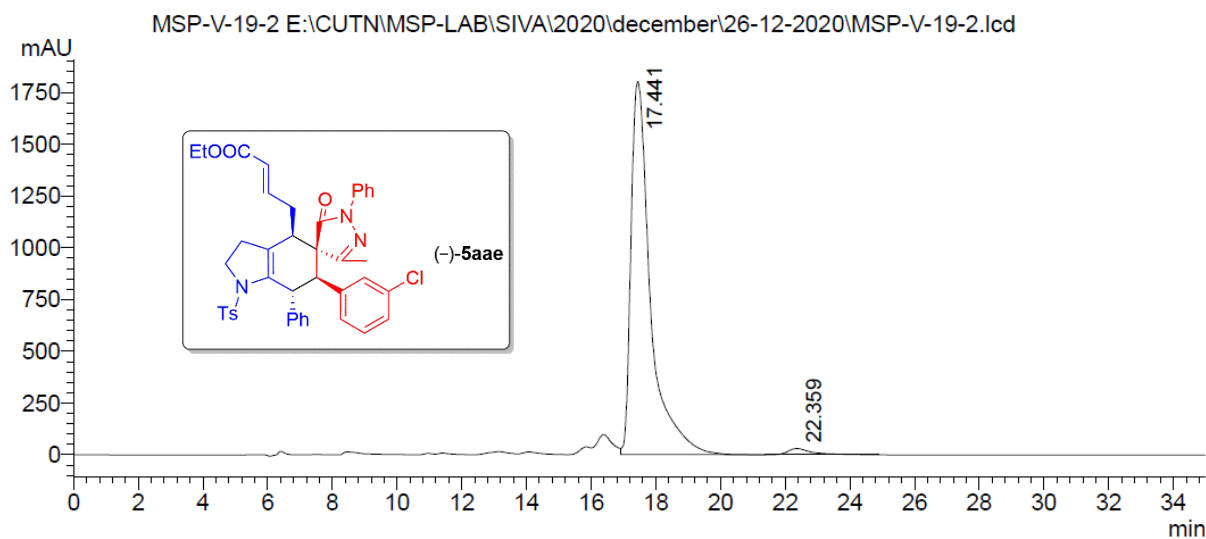

PDA Ch1 254nm

| Peak # | Ret. Time (min) | Area     | Height  | Area%   |
|--------|-----------------|----------|---------|---------|
| 1      | 17.441          | 75213606 | 1802250 | 97.944  |
| 2      | 22.359          | 1579237  | 30068   | 2.056   |
| Total  |                 | 76792843 | 1832317 | 100.000 |

# HPLC data of racemic **5aaf**

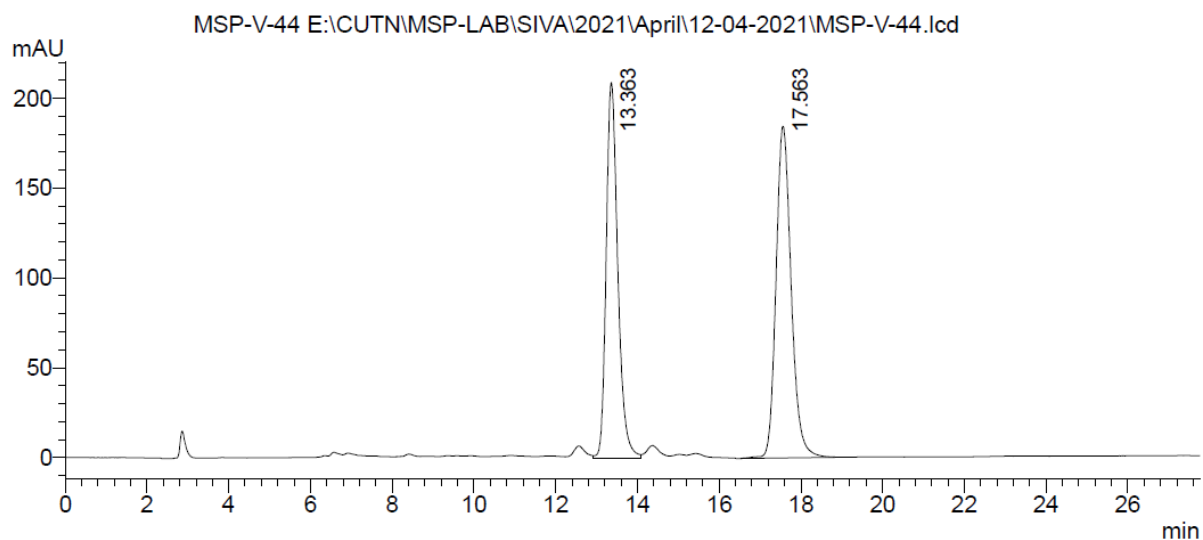

PDA Ch1 254nm

| Peak # | Ret. Time (min) | Area    | Height | Area%   |
|--------|-----------------|---------|--------|---------|
| 1      | 13.363          | 4120296 | 209046 | 46.405  |
| 2      | 17.563          | 4758707 | 184625 | 53.595  |
| Total  |                 | 8879003 | 393671 | 100.000 |

# HPLC data of chiral **5aaf**: 96% *ee*

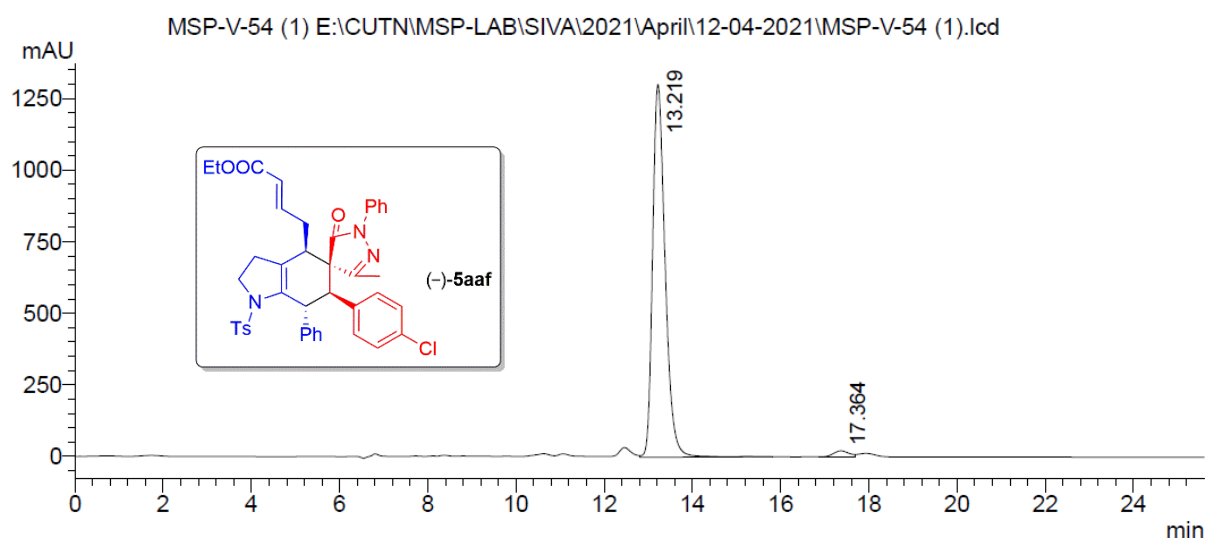

PDA Ch1 254nm

| Peak # | Ret. Time (min) | Area     | Height  | Area%   |
|--------|-----------------|----------|---------|---------|
| 1      | 13.219          | 25779768 | 1303206 | 97.945  |
| 2      | 17.364          | 540979   | 21318   | 2.055   |
| Total  |                 | 26320747 | 1324525 | 100.000 |



HPLC data of racemic **5aag**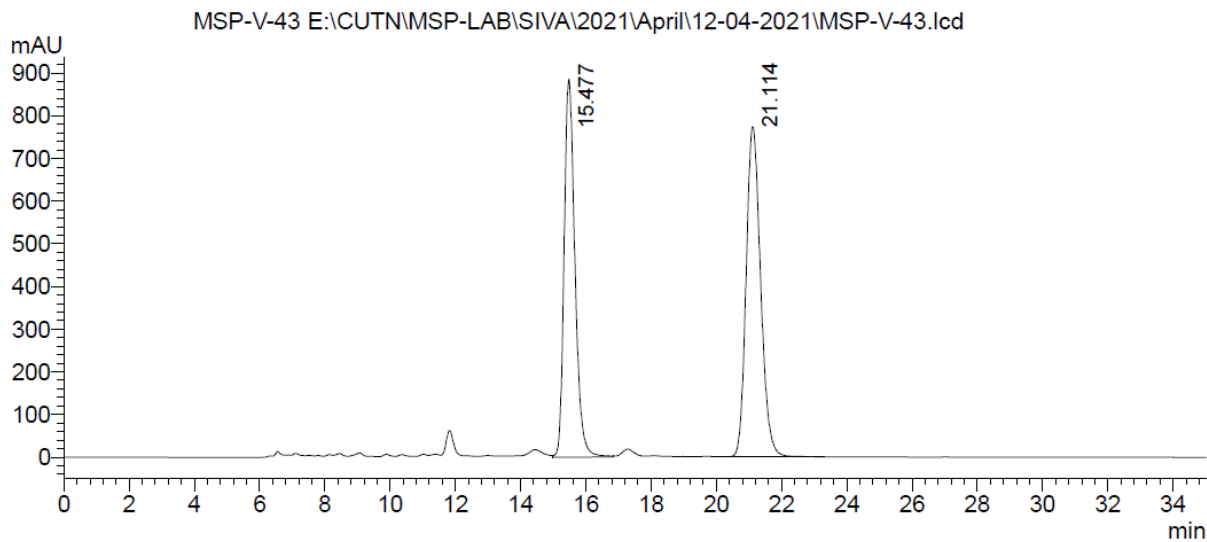

| PDA Ch1 254nm |                 |          |         |         |
|---------------|-----------------|----------|---------|---------|
| Peak #        | Ret. Time (min) | Area     | Height  | Area%   |
| 1             | 15.477          | 20393242 | 885817  | 46.034  |
| 2             | 21.114          | 23907439 | 774063  | 53.966  |
| Total         |                 | 44300681 | 1659880 | 100.000 |

HPLC data of chiral **5aag**: 96% *ee*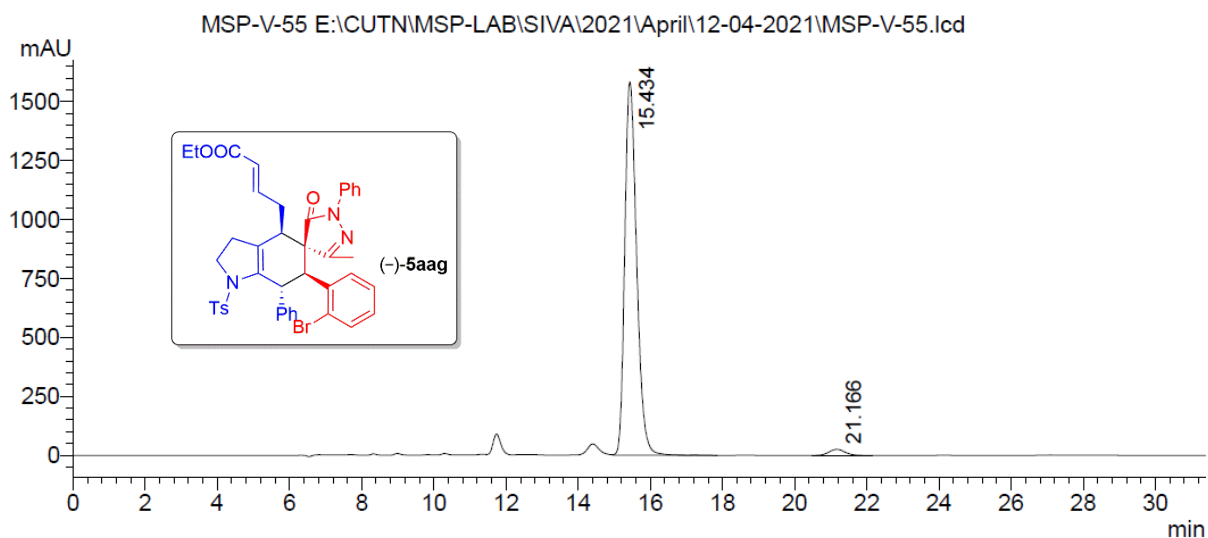

| PDA Ch1 254nm |                 |          |         |         |
|---------------|-----------------|----------|---------|---------|
| Peak #        | Ret. Time (min) | Area     | Height  | Area%   |
| 1             | 15.434          | 36230061 | 1584271 | 97.807  |
| 2             | 21.166          | 812315   | 25858   | 2.193   |
| Total         |                 | 37042377 | 1610130 | 100.000 |

## HPLC data of racemic **5aah**

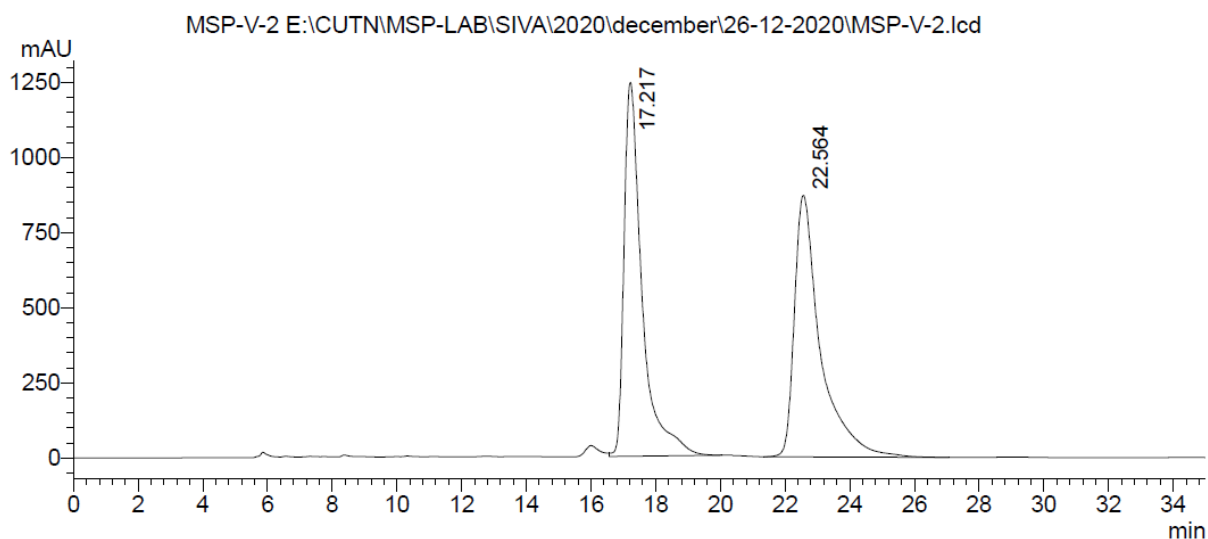

PDA Ch1 254nm

| Peak # | Ret. Time (min) | Area     | Height  | Area%   |
|--------|-----------------|----------|---------|---------|
| 1      | 17.217          | 48286332 | 1244231 | 49.873  |
| 2      | 22.564          | 48532223 | 870643  | 50.127  |
| Total  |                 | 96818555 | 2114874 | 100.000 |

## HPLC data of chiral **5aah**: 95% *ee*

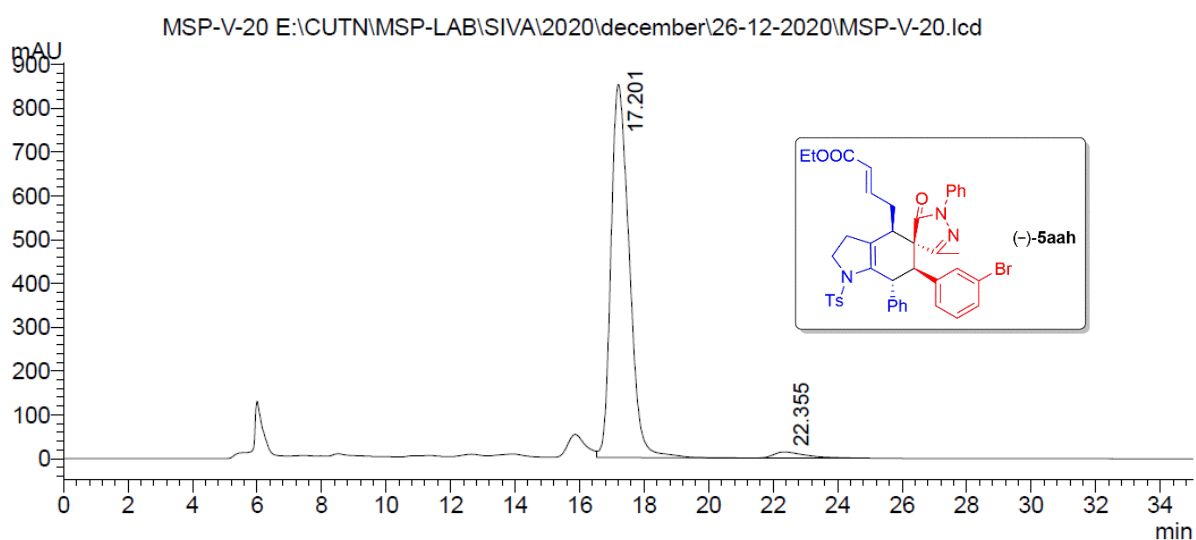

PDA Ch1 254nm

| Peak # | Ret. Time (min) | Area     | Height | Area%   |
|--------|-----------------|----------|--------|---------|
| 1      | 17.201          | 33460277 | 851274 | 97.359  |
| 2      | 22.355          | 907539   | 13647  | 2.641   |
| Total  |                 | 34367816 | 864921 | 100.000 |

### HPLC data of racemic **5aai**

MSP-IV-80 E:\CUTN\MSP-LAB\SIVA\2020\March\12-03-2020\MSP-IV-80.lcd

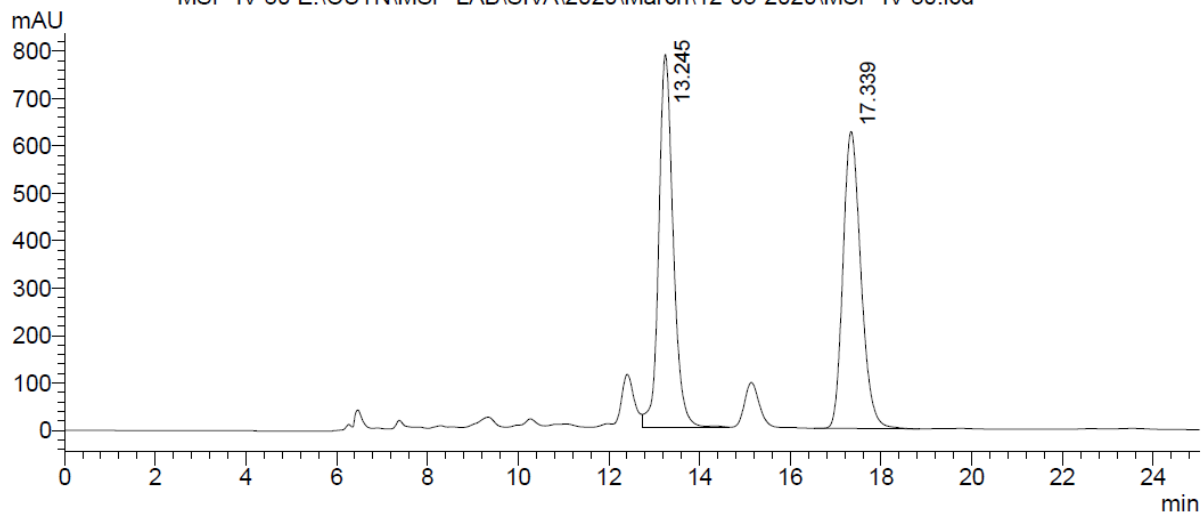

PDA Ch1 254nm

| Peak # | Ret. Time (min) | Area     | Height  | Area%   |
|--------|-----------------|----------|---------|---------|
| 1      | 13.245          | 17385063 | 786455  | 50.226  |
| 2      | 17.339          | 17228734 | 625888  | 49.774  |
| Total  |                 | 34613797 | 1412343 | 100.000 |

### HPLC data of chiral **5aai**: 96% *ee*

MSP-V-6-1 E:\CUTN\MSP-LAB\SIVA\2020\March\12-03-2020\MSP-V-6-1.lcd

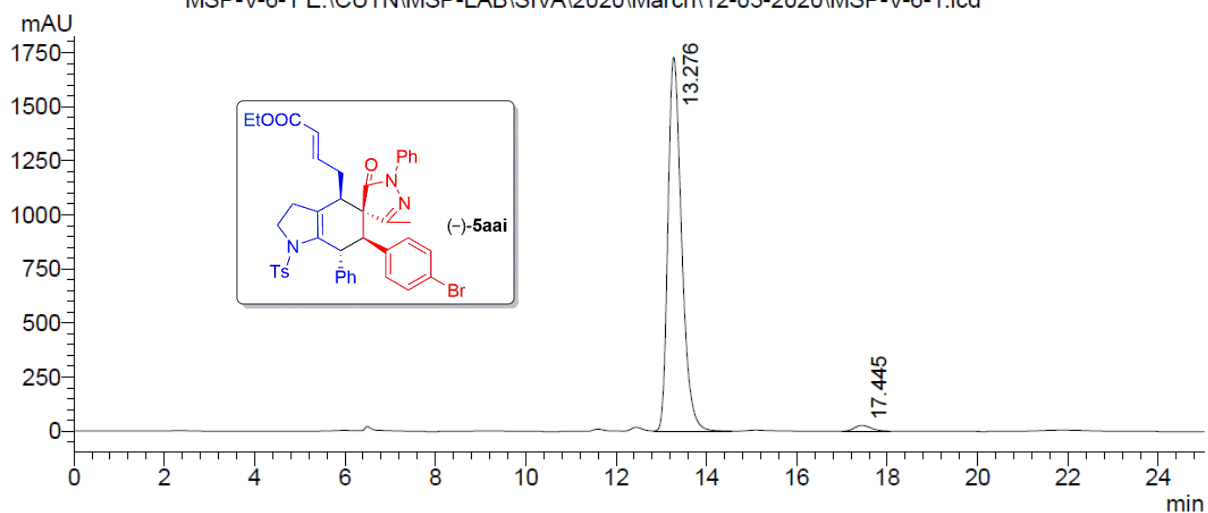

PDA Ch1 254nm

| Peak # | Ret. Time (min) | Area     | Height  | Area%   |
|--------|-----------------|----------|---------|---------|
| 1      | 13.276          | 36280100 | 1727875 | 98.083  |
| 2      | 17.445          | 708964   | 27757   | 1.917   |
| Total  |                 | 36989064 | 1755632 | 100.000 |

## HPLC data of racemic **5aaj**

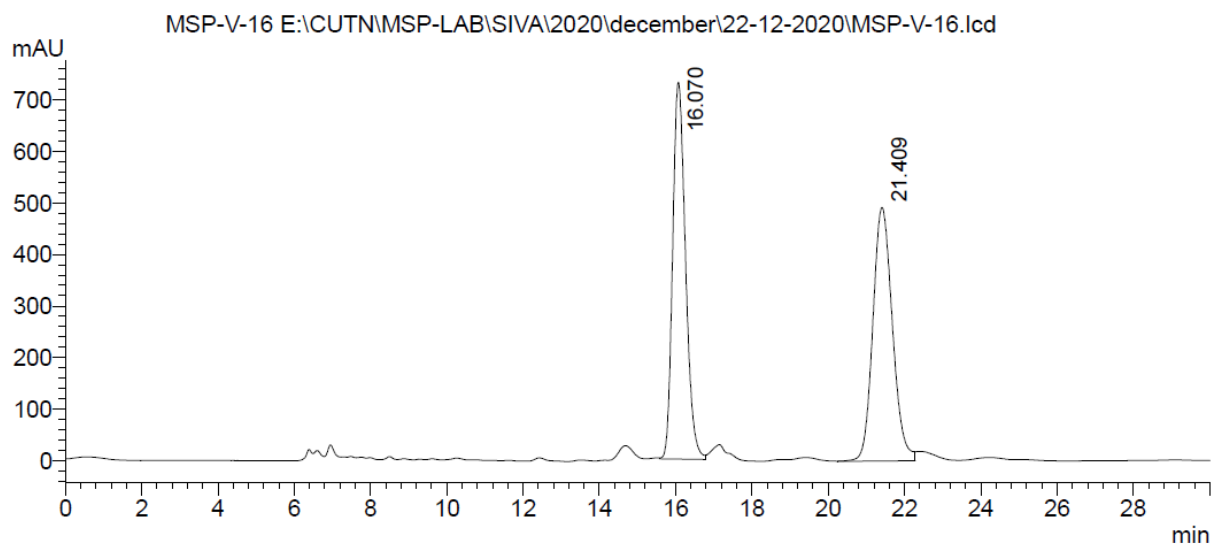

PDA Ch1 254nm

| Peak # | Ret. Time (min) | Area     | Height  | Area%   |
|--------|-----------------|----------|---------|---------|
| 1      | 16.070          | 17121287 | 731300  | 49.453  |
| 2      | 21.409          | 17499916 | 491755  | 50.547  |
| Total  |                 | 34621203 | 1223054 | 100.000 |

## HPLC data of chiral **5aaj**: 97% *ee*

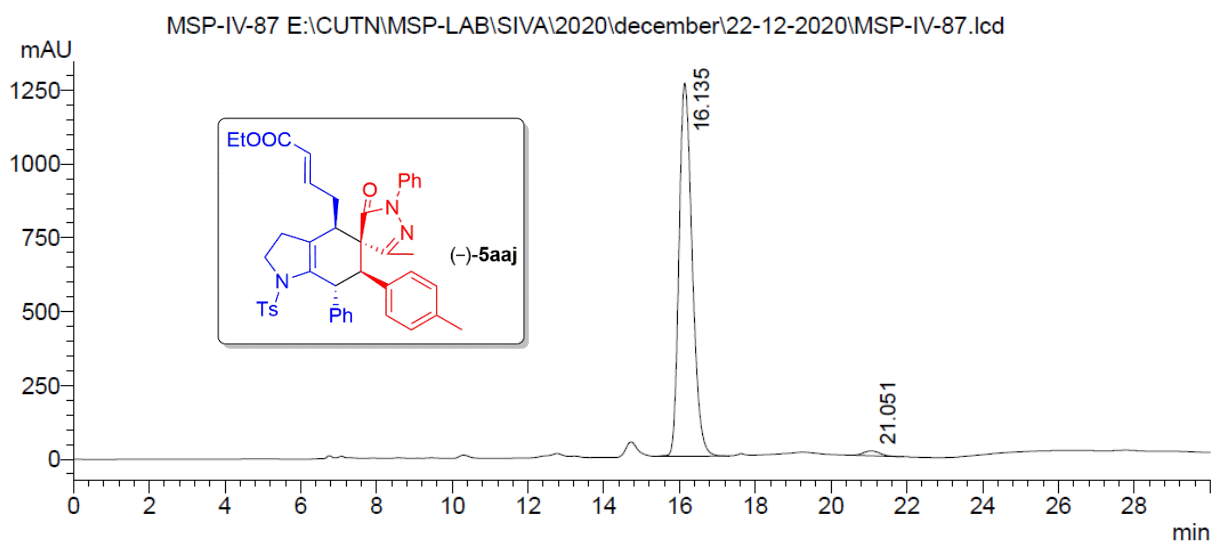

PDA Ch1 254nm

| Peak # | Ret. Time (min) | Area     | Height  | Area%   |
|--------|-----------------|----------|---------|---------|
| 1      | 16.135          | 30492903 | 1263535 | 98.385  |
| 2      | 21.051          | 500602   | 17061   | 1.615   |
| Total  |                 | 30993505 | 1280595 | 100.000 |

### HPLC data of racemic **5aak**

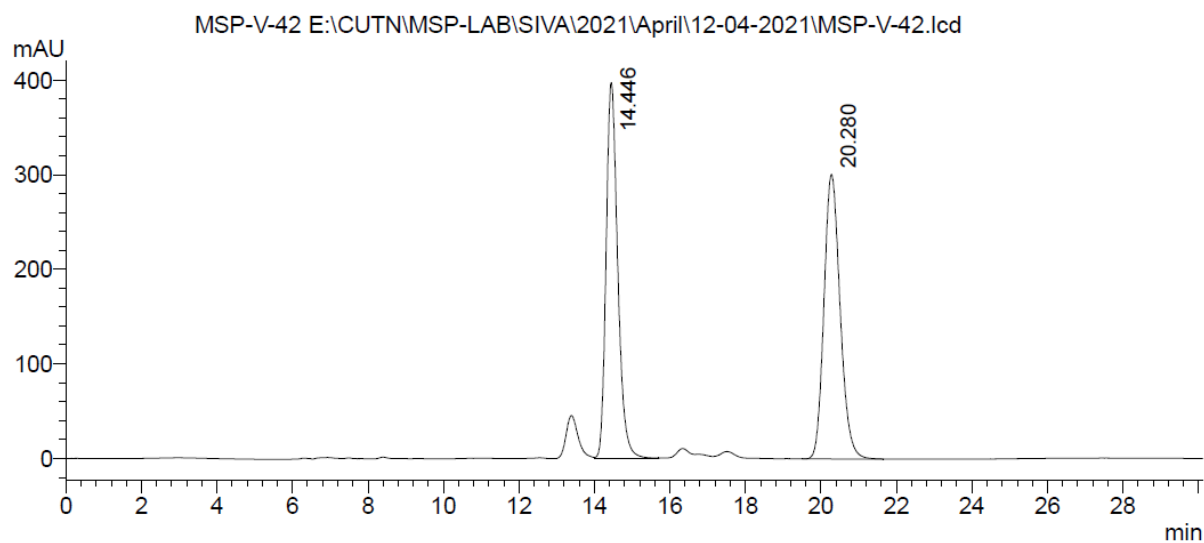

PDA Ch1 254nm

| Peak # | Ret. Time (min) | Area     | Height | Area%   |
|--------|-----------------|----------|--------|---------|
| 1      | 14.446          | 8507529  | 397717 | 48.768  |
| 2      | 20.280          | 8937363  | 300962 | 51.232  |
| Total  |                 | 17444892 | 698679 | 100.000 |

### HPLC data of chiral **5aak**: 96% *ee*

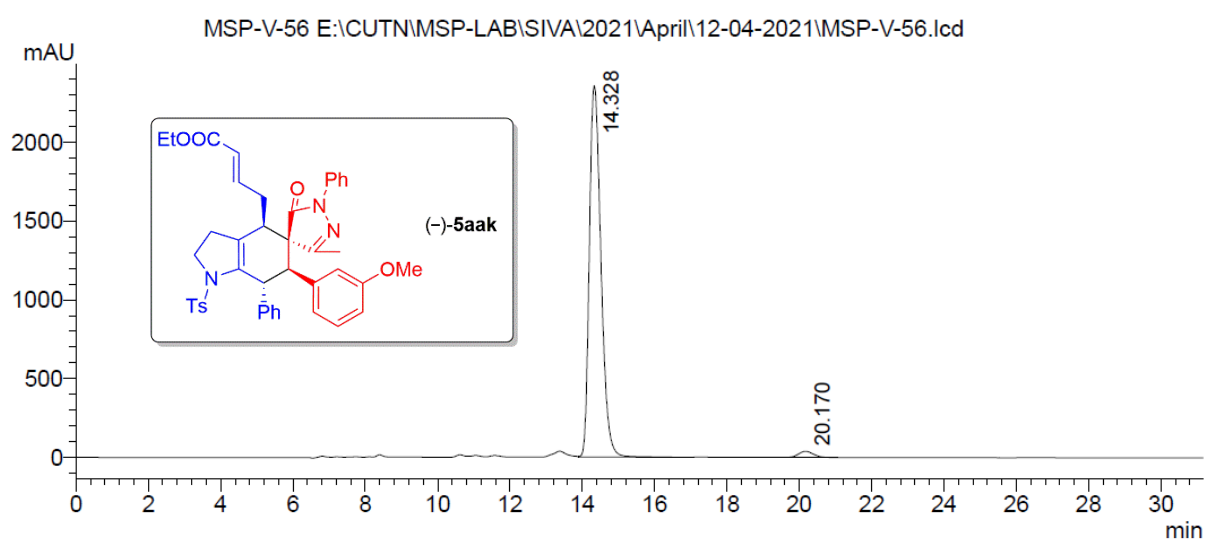

PDA Ch1 254nm

| Peak # | Ret. Time (min) | Area     | Height  | Area%   |
|--------|-----------------|----------|---------|---------|
| 1      | 14.328          | 52620756 | 2356410 | 97.836  |
| 2      | 20.170          | 1164083  | 39678   | 2.164   |
| Total  |                 | 53784839 | 2396088 | 100.000 |

### HPLC data of racemic **5aal**

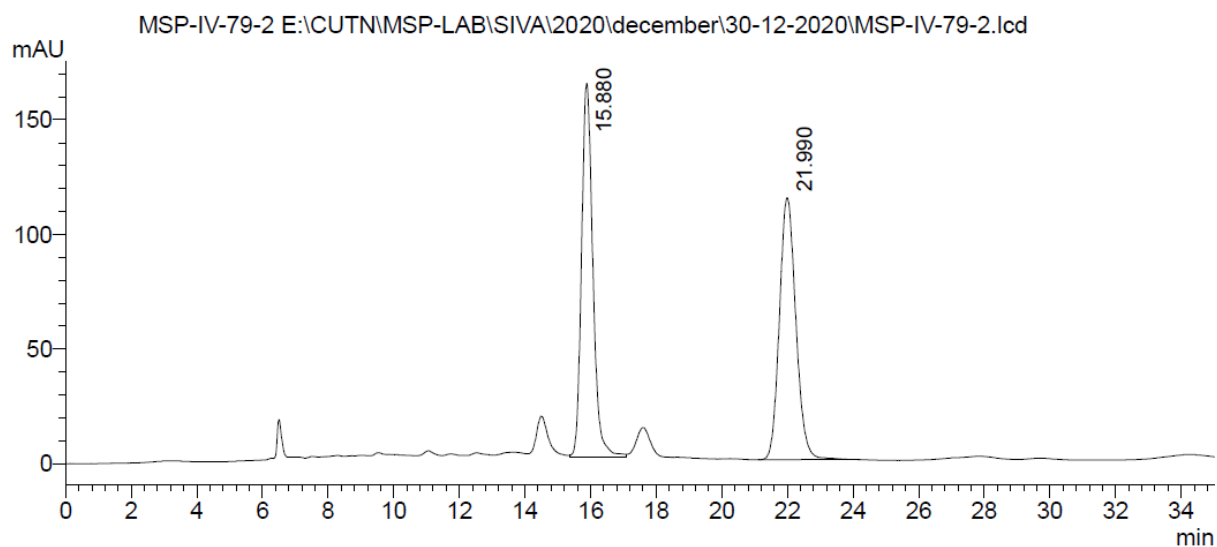

PDA Ch1 254nm

| Peak # | Ret. Time (min) | Area    | Height | Area%   |
|--------|-----------------|---------|--------|---------|
| 1      | 15.880          | 3925873 | 163195 | 49.675  |
| 2      | 21.990          | 3977271 | 114247 | 50.325  |
| Total  |                 | 7903145 | 277442 | 100.000 |

### HPLC data of chiral **5aal**: 96% *ee*

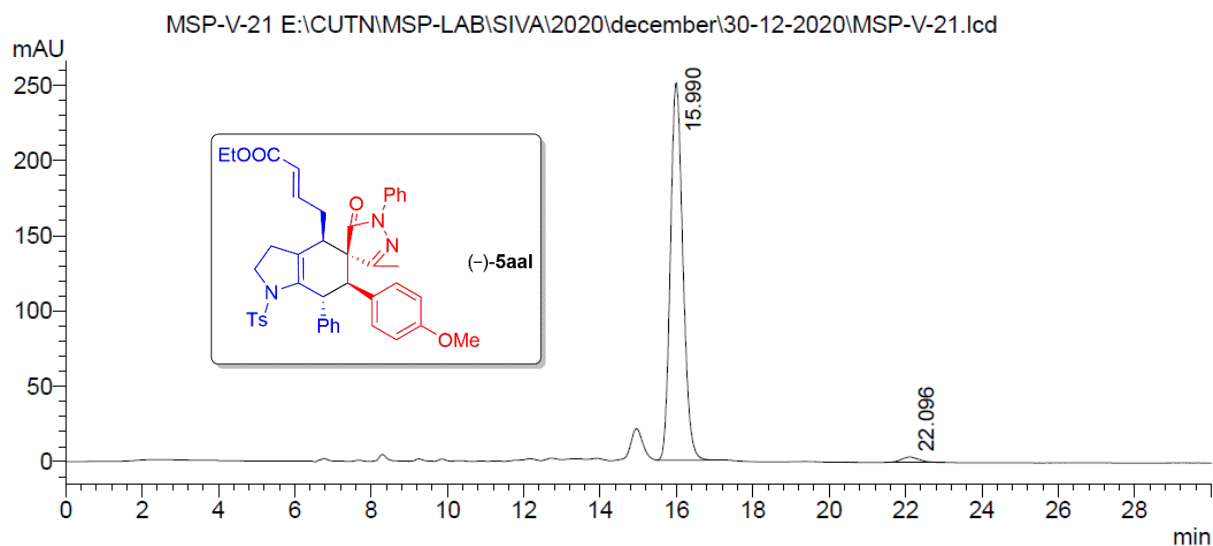

PDA Ch1 254nm

| Peak # | Ret. Time (min) | Area    | Height | Area%   |
|--------|-----------------|---------|--------|---------|
| 1      | 15.990          | 5701876 | 250692 | 97.929  |
| 2      | 22.096          | 120570  | 3572   | 2.071   |
| Total  |                 | 5822446 | 254265 | 100.000 |

# HPLC data of racemic **5aam**

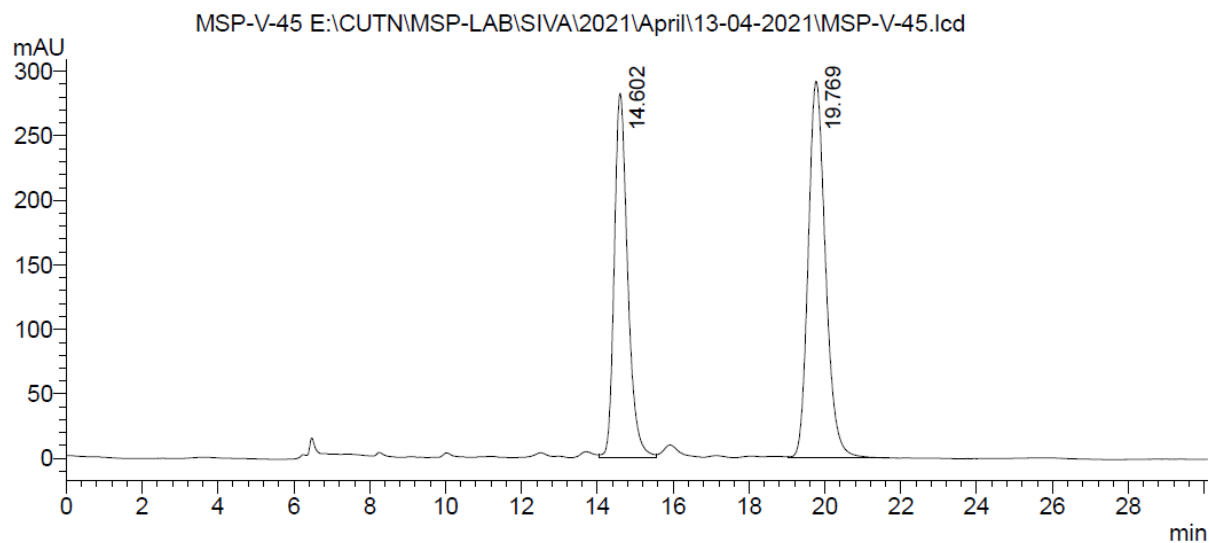

PDA Ch1 254nm

| Peak # | Ret. Time (min) | Area     | Height | Area%   |
|--------|-----------------|----------|--------|---------|
| 1      | 14.602          | 6951747  | 282447 | 42.913  |
| 2      | 19.769          | 9248037  | 291671 | 57.087  |
| Total  |                 | 16199784 | 574118 | 100.000 |

# HPLC data of chiral **5aam**: 94% *ee*

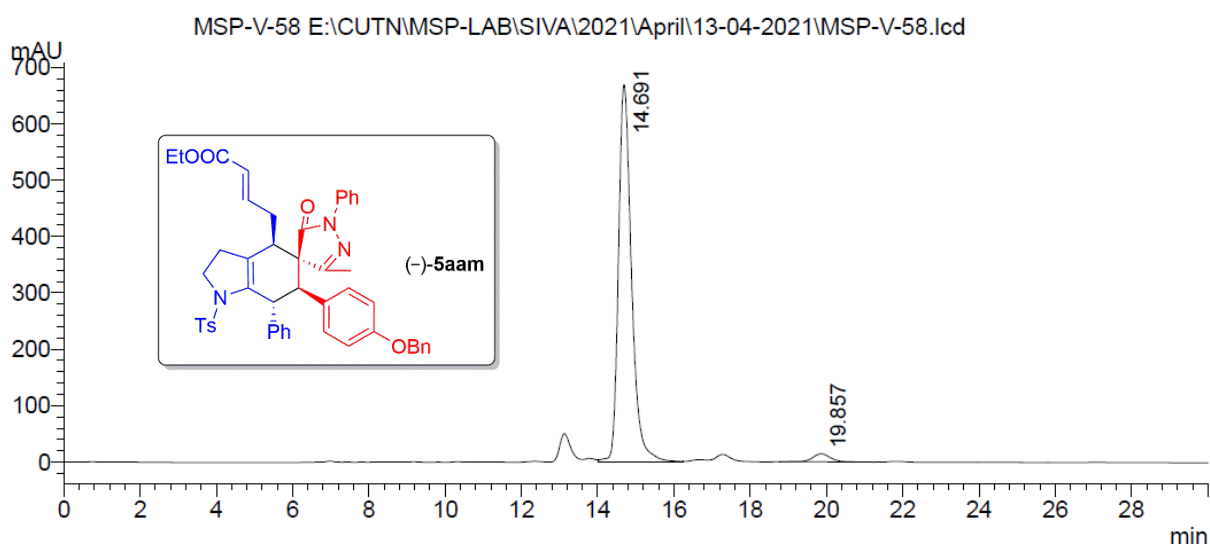

PDA Ch1 254nm

| Peak # | Ret. Time (min) | Area     | Height | Area%   |
|--------|-----------------|----------|--------|---------|
| 1      | 14.691          | 15954817 | 669486 | 96.986  |
| 2      | 19.857          | 495861   | 14536  | 3.014   |
| Total  |                 | 16450678 | 684022 | 100.000 |

### HPLC data of racemic **5aan**

MSP-V-49 E:\CUTN\MSP-LAB\SIVA\2021\April\14-04-2021\MSP-V-49.lcd

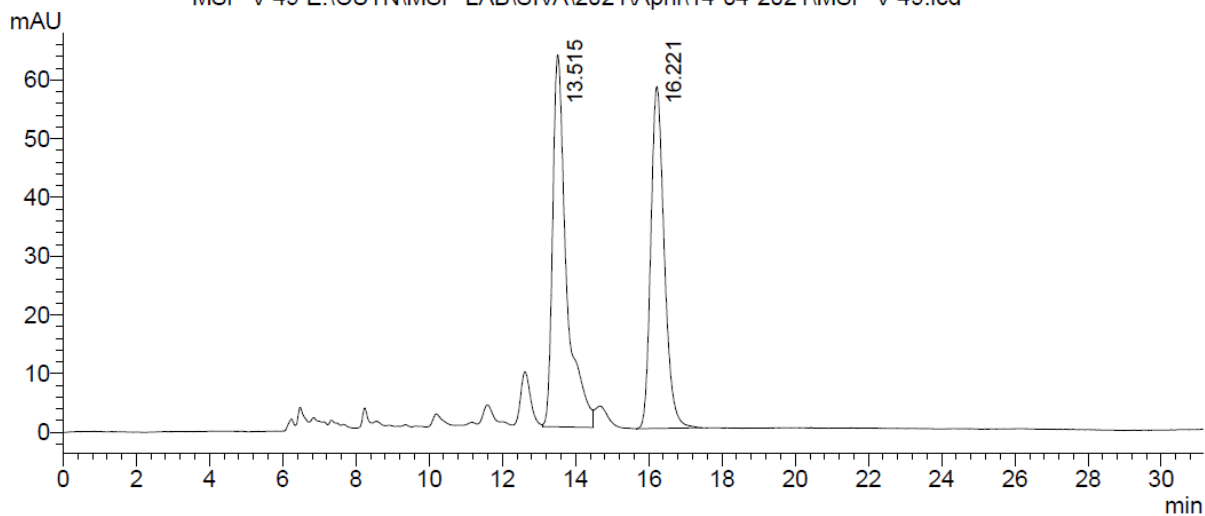

PDA Ch1 254nm

| Peak # | Ret. Time (min) | Area    | Height | Area%   |
|--------|-----------------|---------|--------|---------|
| 1      | 13.515          | 1668854 | 63345  | 52.835  |
| 2      | 16.221          | 1489751 | 58209  | 47.165  |
| Total  |                 | 3158606 | 121554 | 100.000 |

### HPLC data of chiral **5aan**: 93% *ee*

MSP-V-62 E:\CUTN\MSP-LAB\SIVA\2021\April\14-04-2021\MSP-V-62.lcd

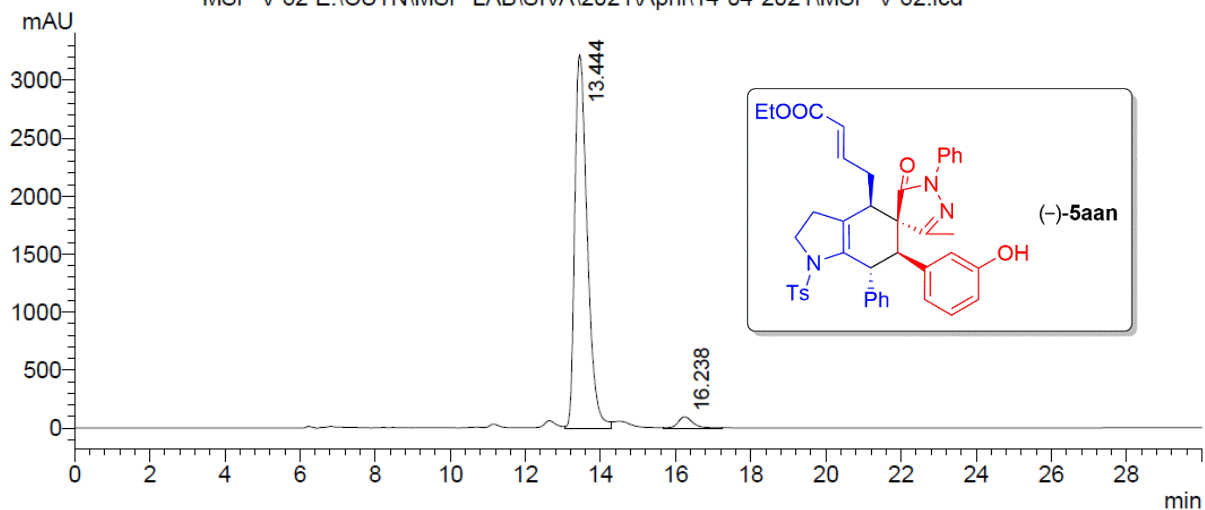

PDA Ch1 254nm

| Peak # | Ret. Time (min) | Area     | Height  | Area%   |
|--------|-----------------|----------|---------|---------|
| 1      | 13.444          | 74621142 | 3220041 | 96.618  |
| 2      | 16.238          | 2612143  | 97497   | 3.382   |
| Total  |                 | 77233285 | 3317538 | 100.000 |



## HPLC data of racemic **5aao**

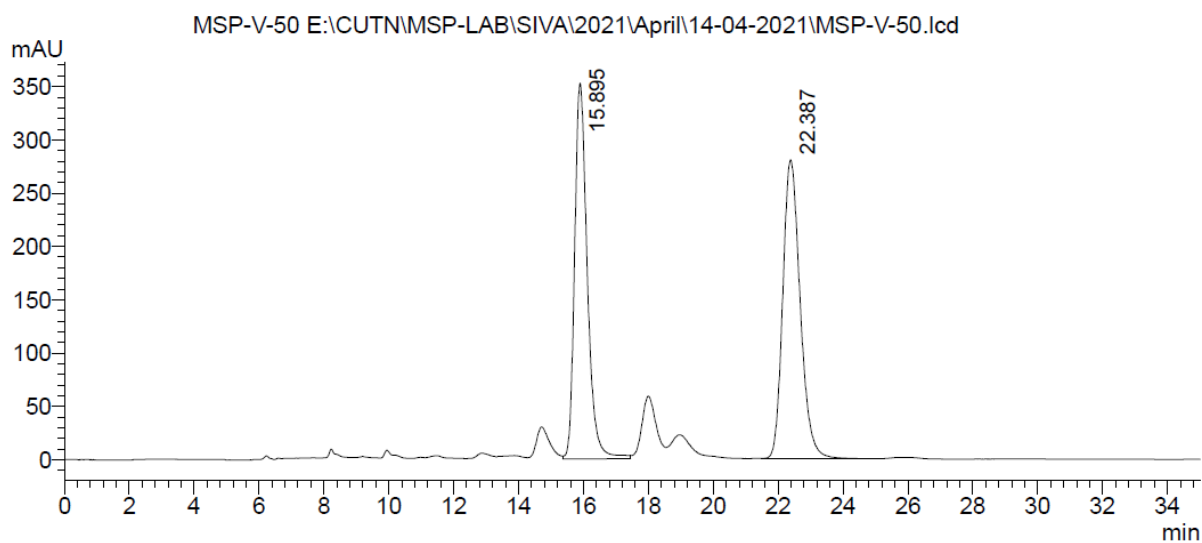

PDA Ch1 254nm

| Peak # | Ret. Time (min) | Area     | Height | Area%   |
|--------|-----------------|----------|--------|---------|
| 1      | 15.895          | 9547163  | 352487 | 47.804  |
| 2      | 22.387          | 10424184 | 280291 | 52.196  |
| Total  |                 | 19971347 | 632777 | 100.000 |

## HPLC data of chiral **5aao**: 74% *ee*

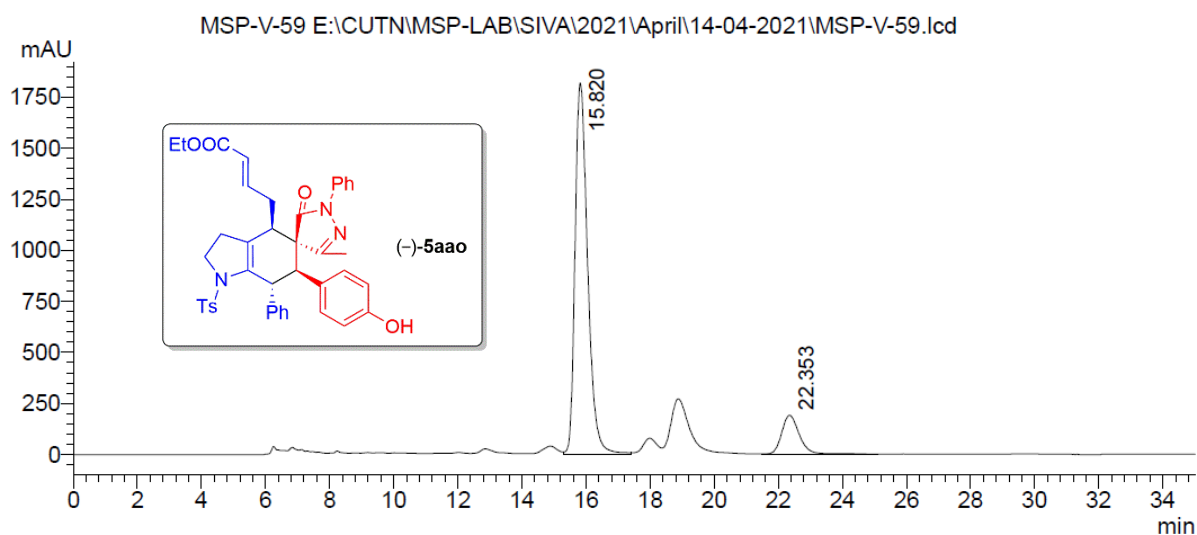

PDA Ch1 254nm

| Peak # | Ret. Time (min) | Area     | Height  | Area%   |
|--------|-----------------|----------|---------|---------|
| 1      | 15.820          | 49779266 | 1818787 | 87.081  |
| 2      | 22.353          | 7385340  | 190883  | 12.919  |
| Total  |                 | 57164606 | 2009670 | 100.000 |

## HPLC data of racemic **5aap**

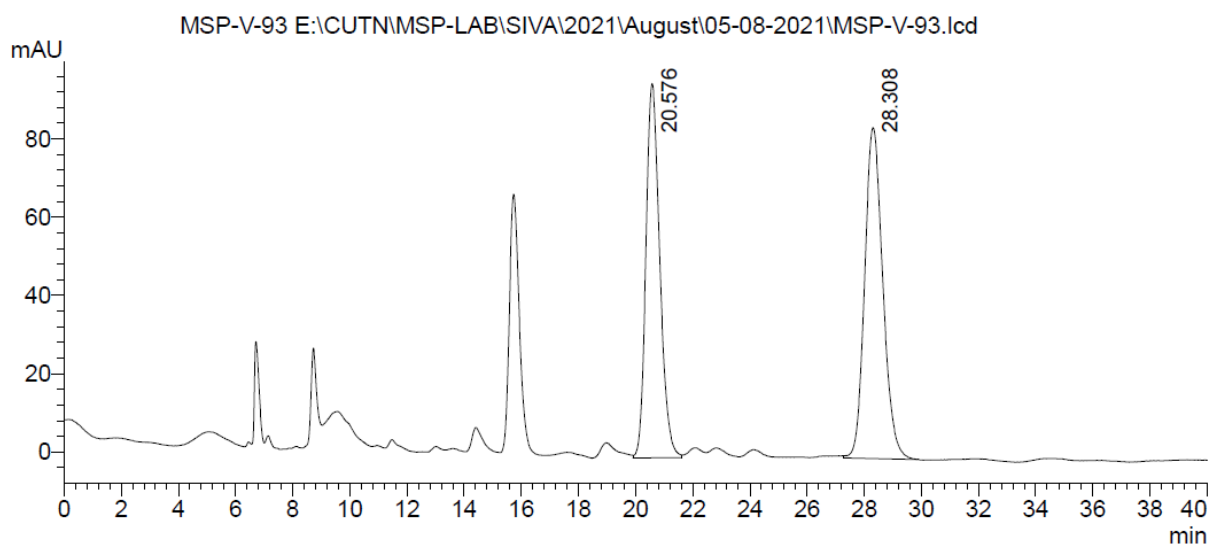

PDA Ch1 254nm

| Peak # | Ret. Time (min) | Area    | Height | Area%   |
|--------|-----------------|---------|--------|---------|
| 1      | 20.576          | 3223935 | 95685  | 46.310  |
| 2      | 28.308          | 3737777 | 84613  | 53.690  |
| Total  |                 | 6961713 | 180298 | 100.000 |

## HPLC data of chiral **5aap**: 94% *ee*

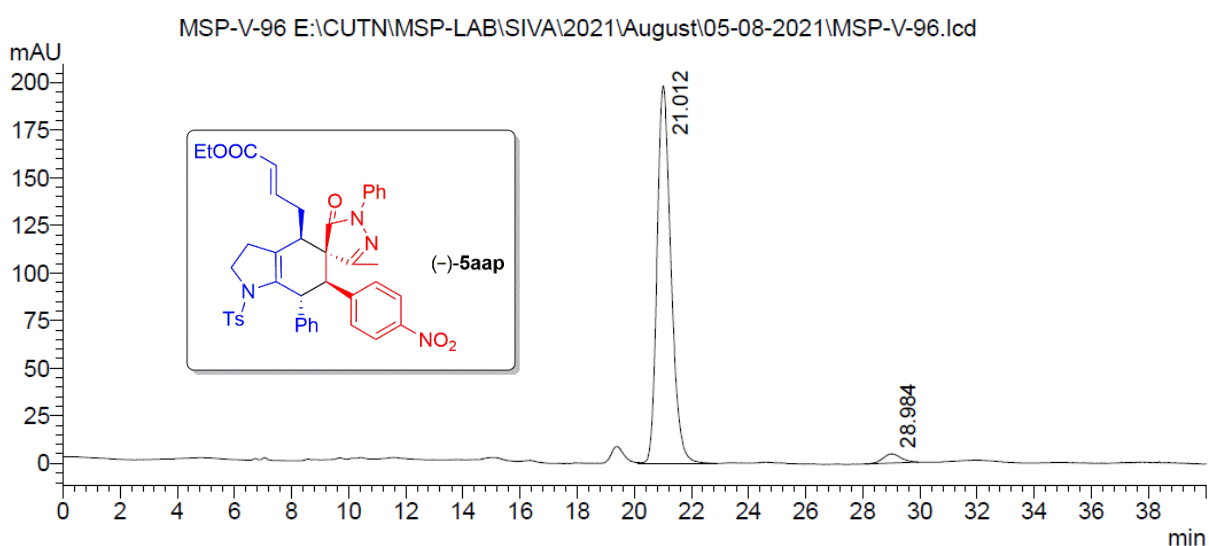

PDA Ch1 254nm

| Peak # | Ret. Time (min) | Area    | Height | Area%   |
|--------|-----------------|---------|--------|---------|
| 1      | 21.012          | 6713556 | 198183 | 96.982  |
| 2      | 28.984          | 208912  | 4887   | 3.018   |
| Total  |                 | 6922468 | 203069 | 100.000 |

### HPLC data of racemic **5aaq**

MSP-V-17 E:\CUTN\MSP-LAB\SIVA\2020\december\22-12-2020\MSP-V-17.lcd

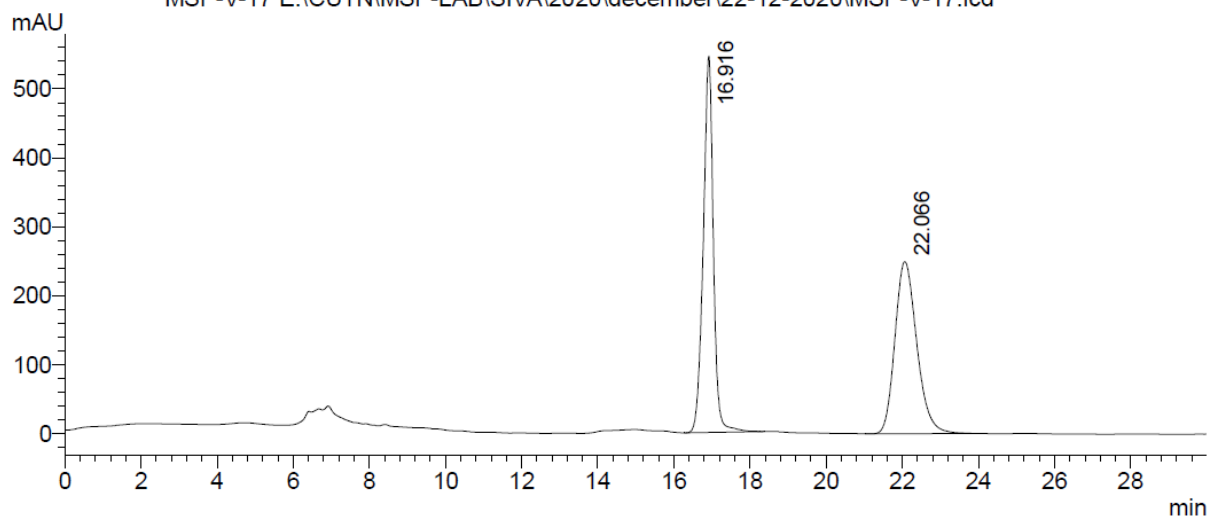

PDA Ch1 254nm

| Peak # | Ret. Time (min) | Area     | Height | Area%   |
|--------|-----------------|----------|--------|---------|
| 1      | 16.916          | 10034637 | 545402 | 50.075  |
| 2      | 22.066          | 10004435 | 249565 | 49.925  |
| Total  |                 | 20039071 | 794967 | 100.000 |

### HPLC data of chiral **5aaq**: 95% *ee*

MSP-IV-85 E:\CUTN\MSP-LAB\SIVA\2020\december\22-12-2020\MSP-IV-85.lcd

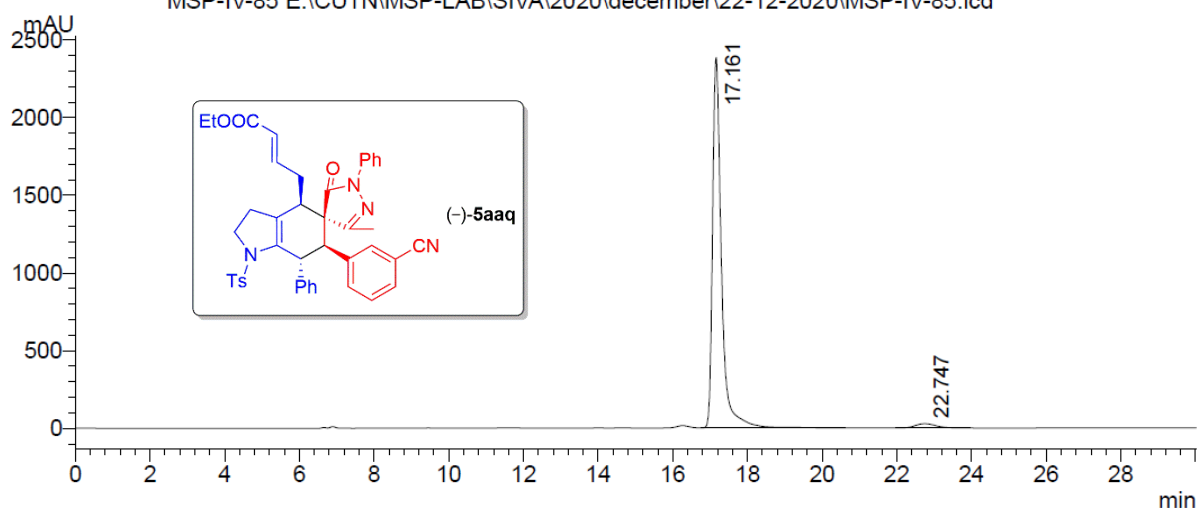

PDA Ch1 254nm

| Peak # | Ret. Time (min) | Area     | Height  | Area%   |
|--------|-----------------|----------|---------|---------|
| 1      | 17.161          | 39465697 | 2386015 | 97.344  |
| 2      | 22.747          | 1076935  | 27890   | 2.656   |
| Total  |                 | 40542632 | 2413905 | 100.000 |

### C data of racemic **5aar**

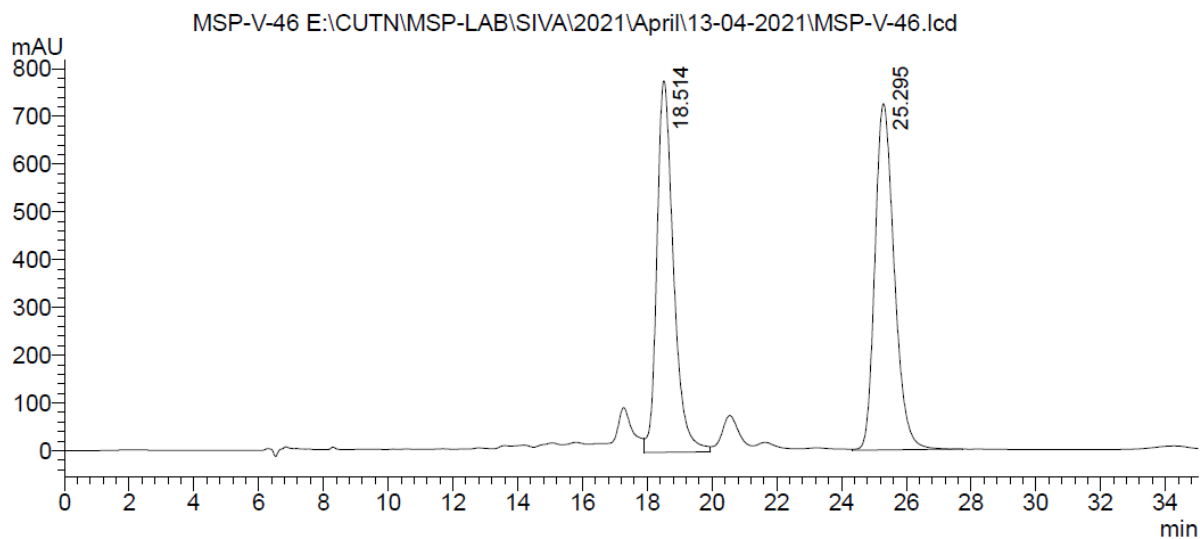

PDA Ch1 254nm

| Peak # | Ret. Time (min) | Area     | Height  | Area%   |
|--------|-----------------|----------|---------|---------|
| 1      | 18.514          | 27691558 | 778248  | 47.876  |
| 2      | 25.295          | 30148384 | 725581  | 52.124  |
| Total  |                 | 57839942 | 1503830 | 100.000 |

### HPLC data of chiral **5aar**: 96% *ee*

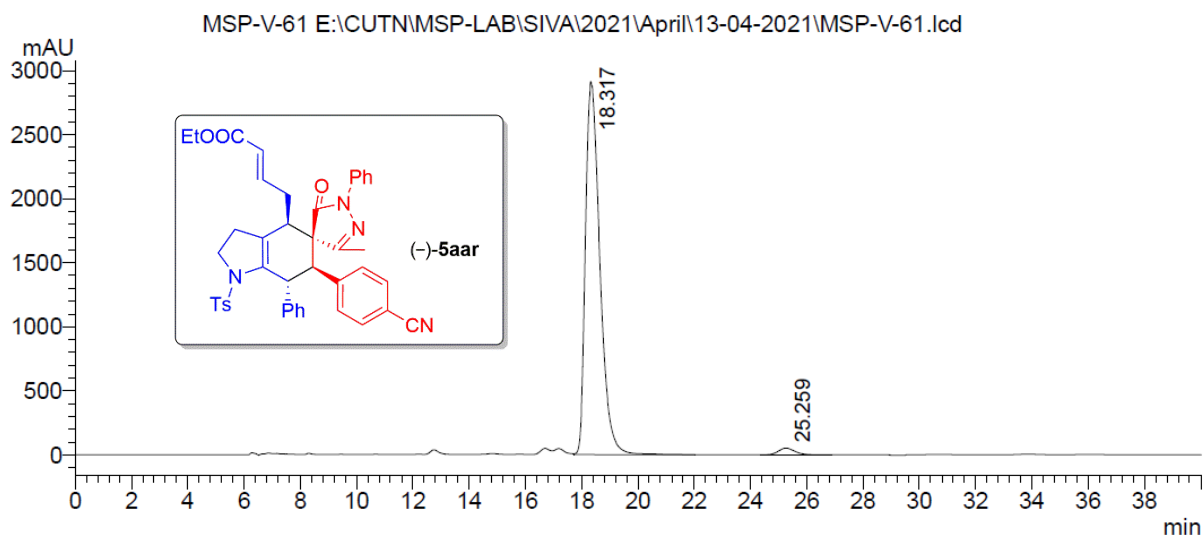

PDA Ch1 254nm

| Peak # | Ret. Time (min) | Area      | Height  | Area%   |
|--------|-----------------|-----------|---------|---------|
| 1      | 18.317          | 103855457 | 2912602 | 97.968  |
| 2      | 25.259          | 2153920   | 52022   | 2.032   |
| Total  |                 | 106009378 | 2964624 | 100.000 |

## HPLC data of racemic **5aas**

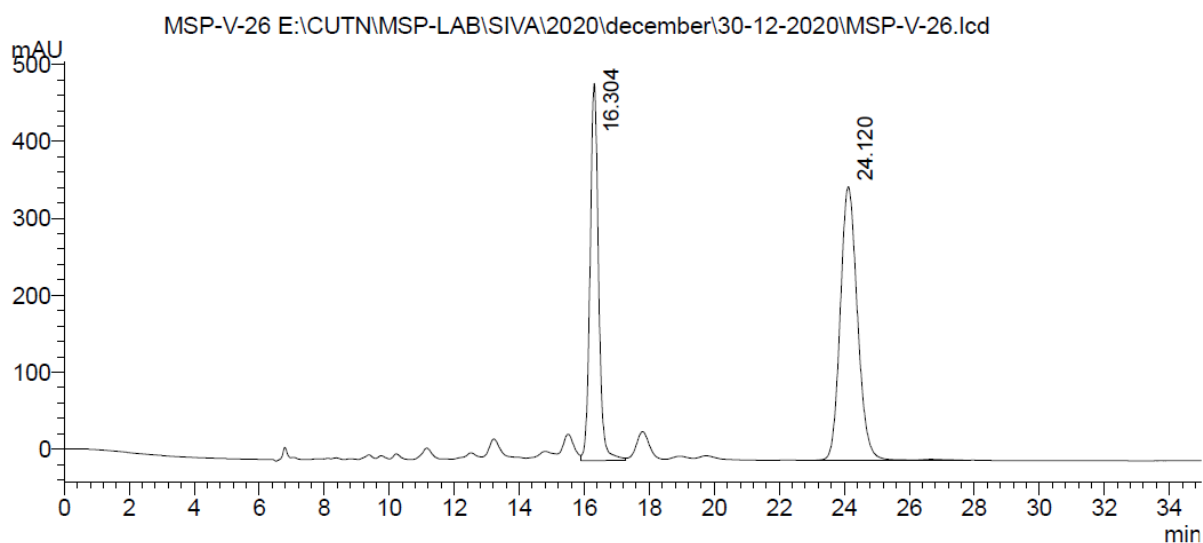

PDA Ch1 254nm

| Peak # | Ret. Time (min) | Area     | Height | Area%   |
|--------|-----------------|----------|--------|---------|
| 1      | 16.304          | 8888194  | 490263 | 40.384  |
| 2      | 24.120          | 13121173 | 355885 | 59.616  |
| Total  |                 | 22009367 | 846148 | 100.000 |

## HPLC data of chiral **5aas**: 96% *ee*

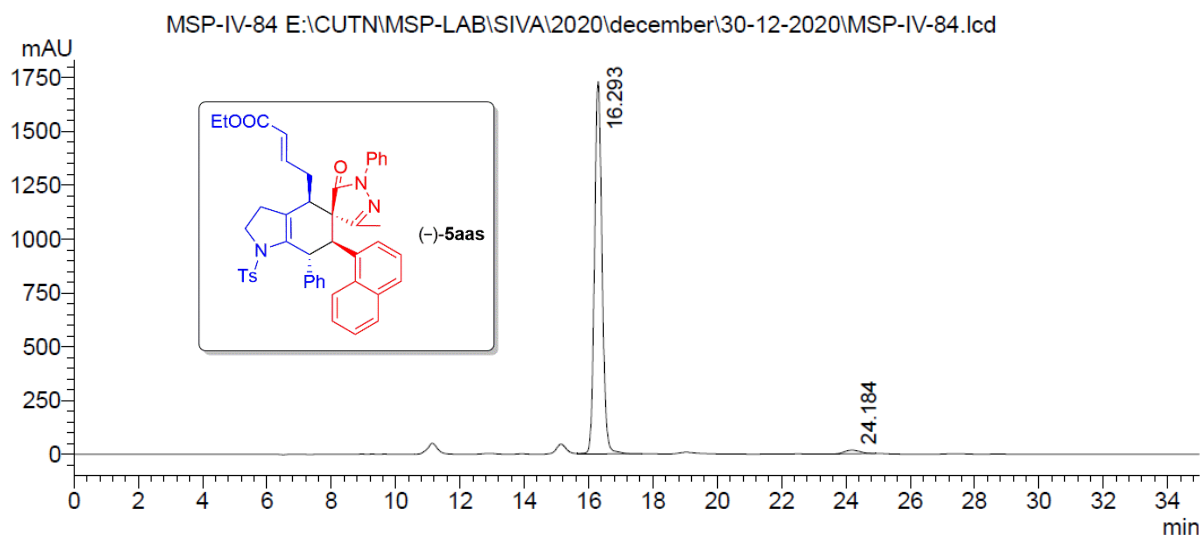

PDA Ch1 254nm

| Peak # | Ret. Time (min) | Area     | Height  | Area%   |
|--------|-----------------|----------|---------|---------|
| 1      | 16.293          | 28193095 | 1729156 | 98.008  |
| 2      | 24.184          | 572940   | 17335   | 1.992   |
| Total  |                 | 28766035 | 1746492 | 100.000 |

HPLC data of racemic **5aat**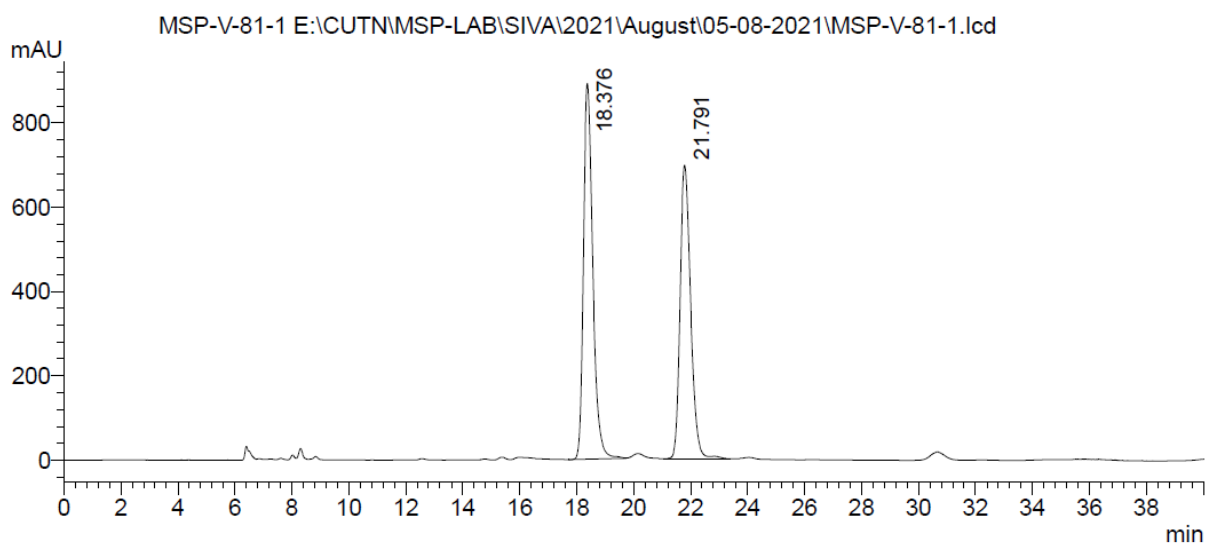

| Peak # | Ret. Time (min) | Area     | Height  | Area%   |
|--------|-----------------|----------|---------|---------|
| 1      | 18.376          | 20307992 | 891832  | 53.179  |
| 2      | 21.791          | 17880107 | 696148  | 46.821  |
| Total  |                 | 38188098 | 1587980 | 100.000 |

HPLC data of chiral **5aat**: 90% *ee*

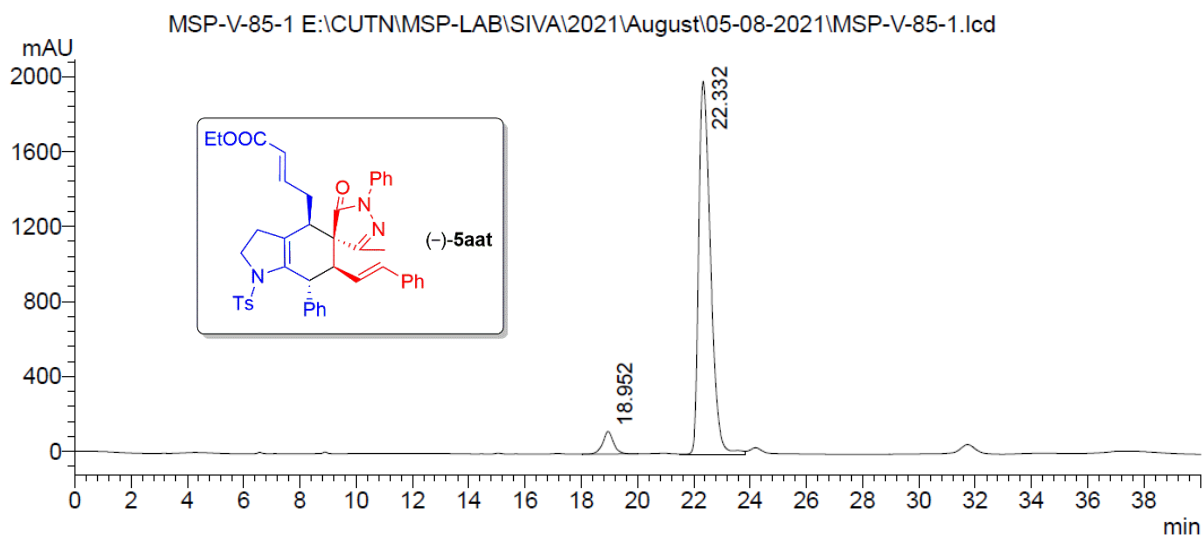

| PDA Ch1 254nm |                 |          |         |         |
|---------------|-----------------|----------|---------|---------|
| Peak #        | Ret. Time (min) | Area     | Height  | Area%   |
| 1             | 18.952          | 3224977  | 120895  | 5.255   |
| 2             | 22.332          | 58146192 | 1989517 | 94.745  |
| Total         |                 | 61371169 | 2110412 | 100.000 |

## HPLC data of racemic **5aau**

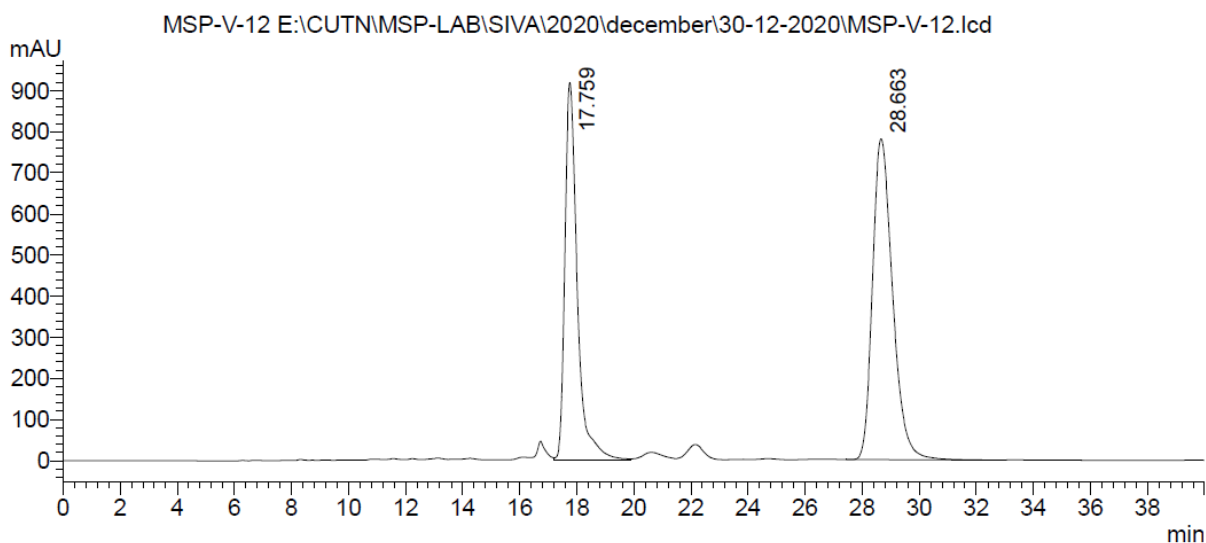

PDA Ch1 254nm

| Peak # | Ret. Time (min) | Area     | Height  | Area%   |
|--------|-----------------|----------|---------|---------|
| 1      | 17.759          | 27488791 | 917145  | 41.887  |
| 2      | 28.663          | 38137757 | 780157  | 58.113  |
| Total  |                 | 65626549 | 1697302 | 100.000 |

## HPLC data of chiral **5aau**: 93% *ee*

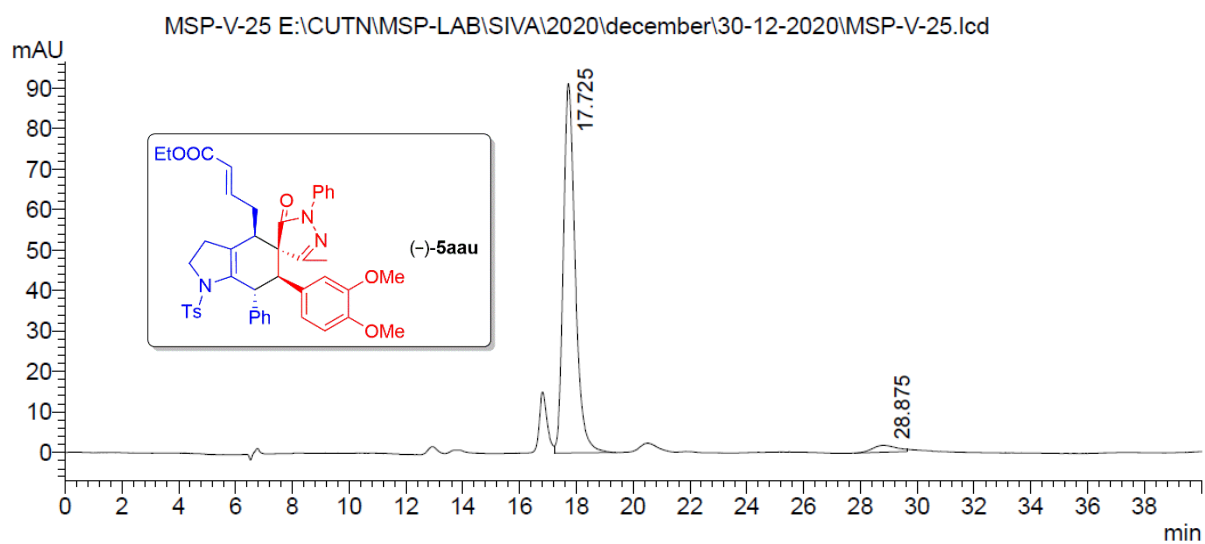

PDA Ch1 254nm

| Peak # | Ret. Time (min) | Area    | Height | Area%   |
|--------|-----------------|---------|--------|---------|
| 1      | 17.725          | 2657396 | 91252  | 96.269  |
| 2      | 28.875          | 102996  | 1712   | 3.731   |
| Total  |                 | 2760392 | 92964  | 100.000 |

### HPLC data of racemic **5aav**

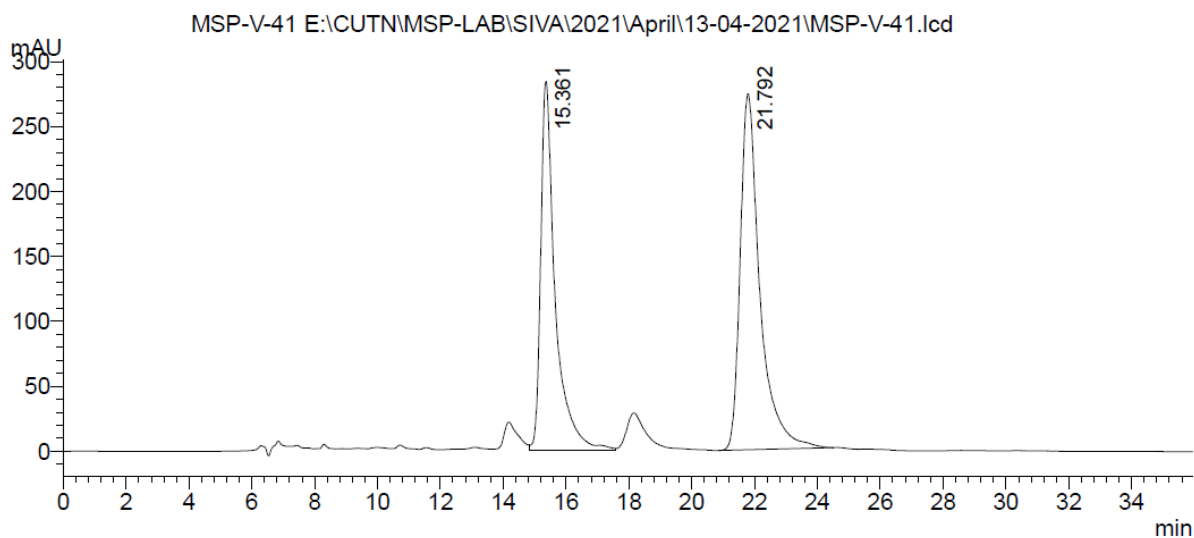

PDA Ch1 254nm

| Peak # | Ret. Time (min) | Area     | Height | Area%   |
|--------|-----------------|----------|--------|---------|
| 1      | 15.361          | 9085326  | 283860 | 43.252  |
| 2      | 21.792          | 11920080 | 273955 | 56.748  |
| Total  |                 | 21005407 | 557815 | 100.000 |

### HPLC data of chiral **5aav**: 98% *ee*

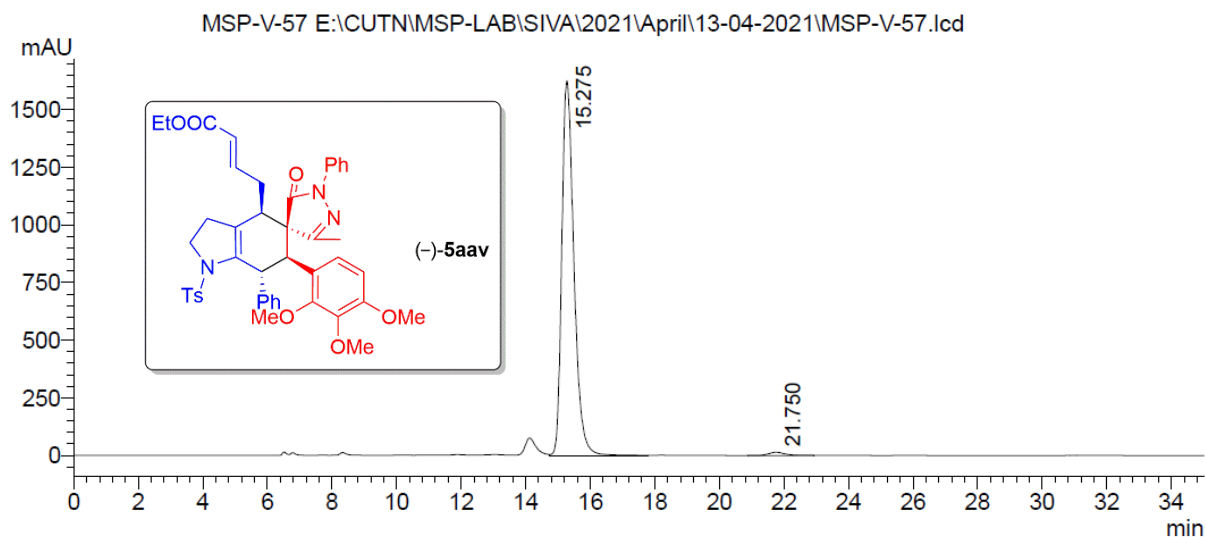

PDA Ch1 254nm

| Peak # | Ret. Time (min) | Area     | Height  | Area%   |
|--------|-----------------|----------|---------|---------|
| 1      | 15.275          | 42297000 | 1623985 | 98.824  |
| 2      | 21.750          | 503265   | 13970   | 1.176   |
| Total  |                 | 42800265 | 1637956 | 100.000 |



### HPLC data of racemic **5aaw**

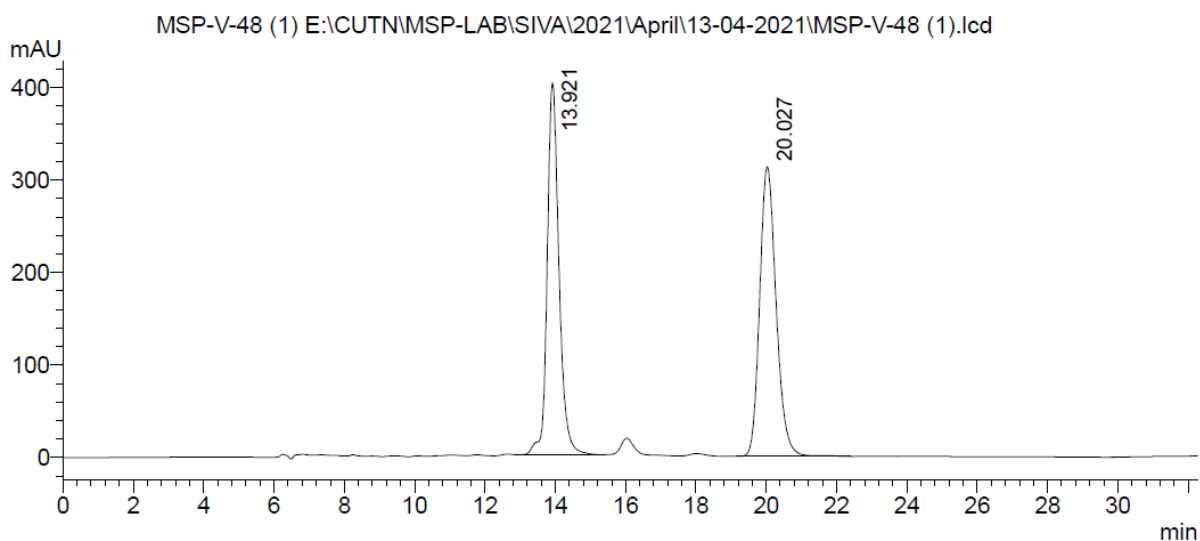

PDA Ch1 254nm

| Peak # | Ret. Time (min) | Area     | Height | Area%   |
|--------|-----------------|----------|--------|---------|
| 1      | 13.921          | 9335888  | 401762 | 47.791  |
| 2      | 20.027          | 10199082 | 312910 | 52.209  |
| Total  |                 | 19534970 | 714672 | 100.000 |

### HPLC data of chiral **5aaw**: 85% *ee*

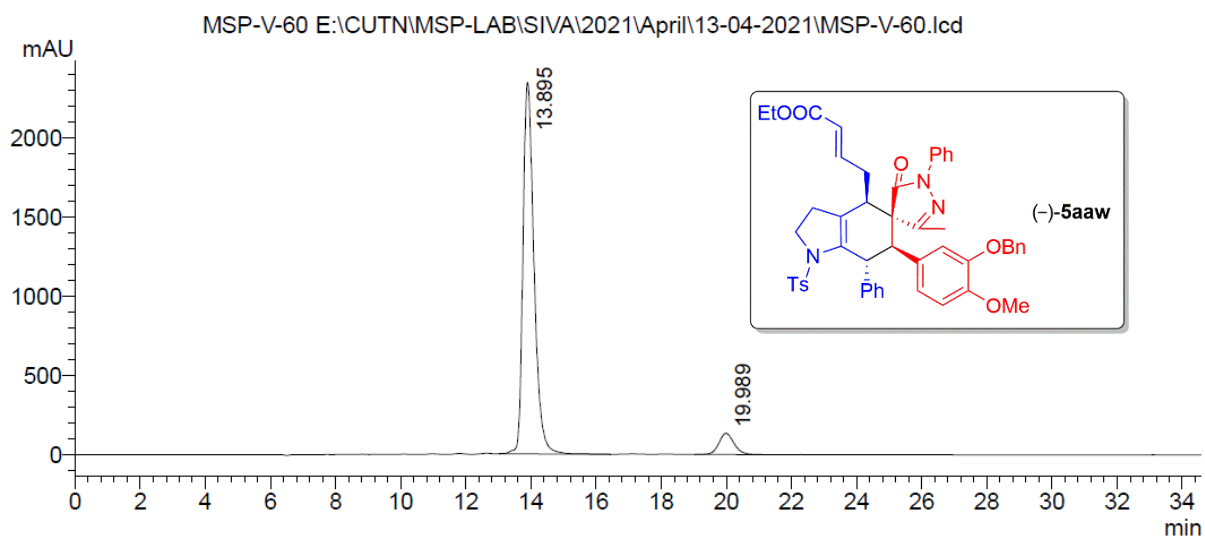

PDA Ch1 254nm

| Peak # | Ret. Time (min) | Area     | Height  | Area%   |
|--------|-----------------|----------|---------|---------|
| 1      | 13.895          | 55300584 | 2347009 | 92.655  |
| 2      | 19.989          | 4384048  | 134169  | 7.345   |
| Total  |                 | 59684631 | 2481177 | 100.000 |

## HPLC data of racemic **5aax**

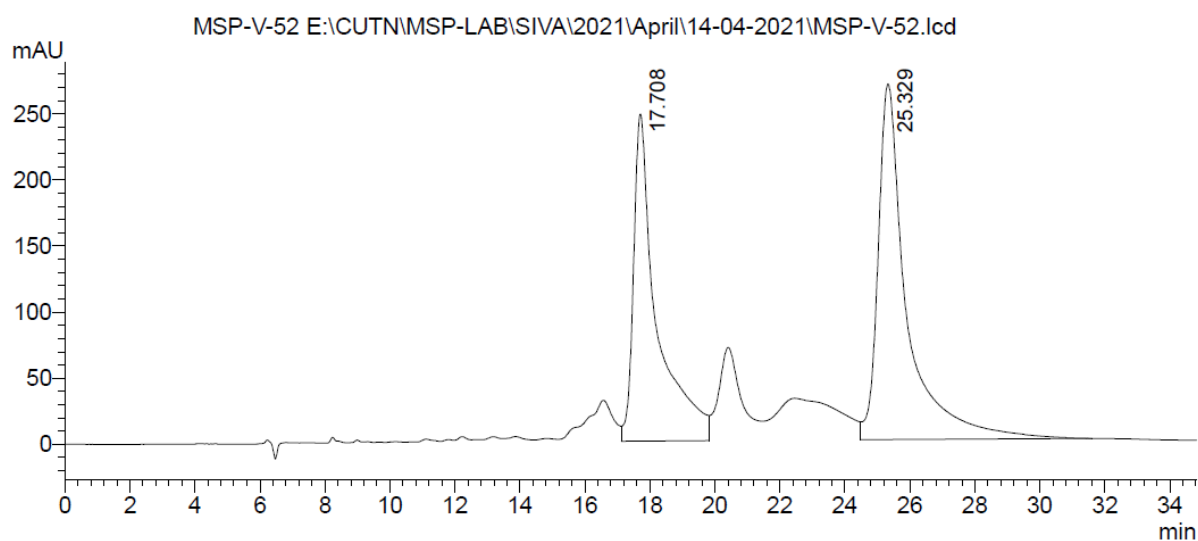

PDA Ch1 254nm

| Peak # | Ret. Time (min) | Area     | Height | Area%   |
|--------|-----------------|----------|--------|---------|
| 1      | 17.708          | 12262258 | 247515 | 42.549  |
| 2      | 25.329          | 16556966 | 269218 | 57.451  |
| Total  |                 | 28819224 | 516733 | 100.000 |

## HPLC data of chiral **5aax**: 96% *ee*

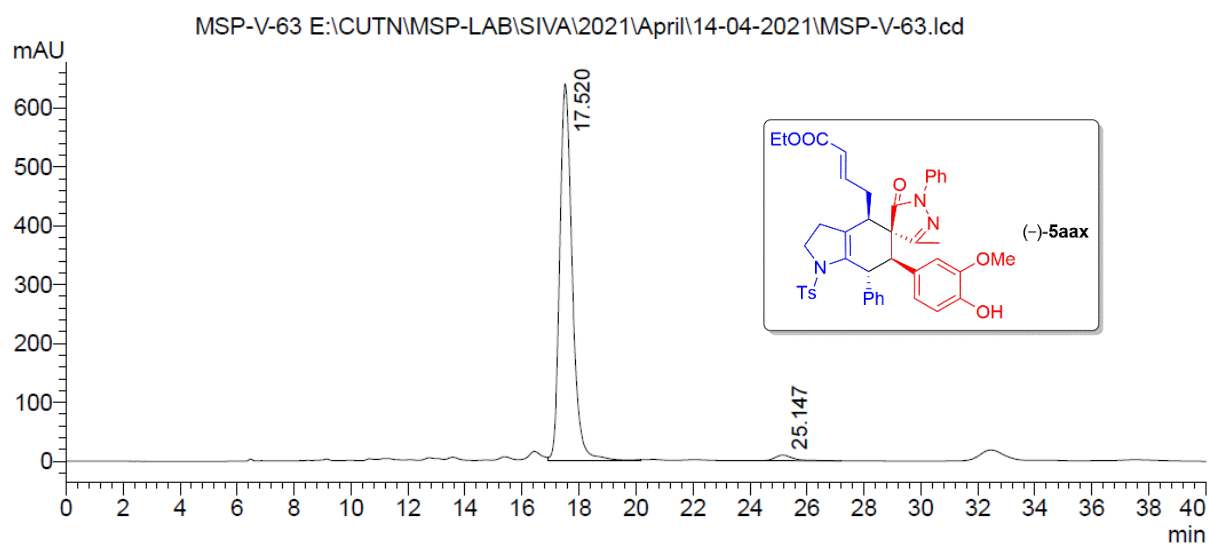

PDA Ch1 254nm

| Peak # | Ret. Time (min) | Area     | Height | Area%   |
|--------|-----------------|----------|--------|---------|
| 1      | 17.520          | 19615251 | 640221 | 97.826  |
| 2      | 25.147          | 435950   | 9432   | 2.174   |
| Total  |                 | 20051201 | 649653 | 100.000 |

## HPLC data of racemic **5aay**

MSP-V-51 E:\CUTN\MSP-LAB\SIVA\2021\April\14-04-2021\MSP-V-51.lcd

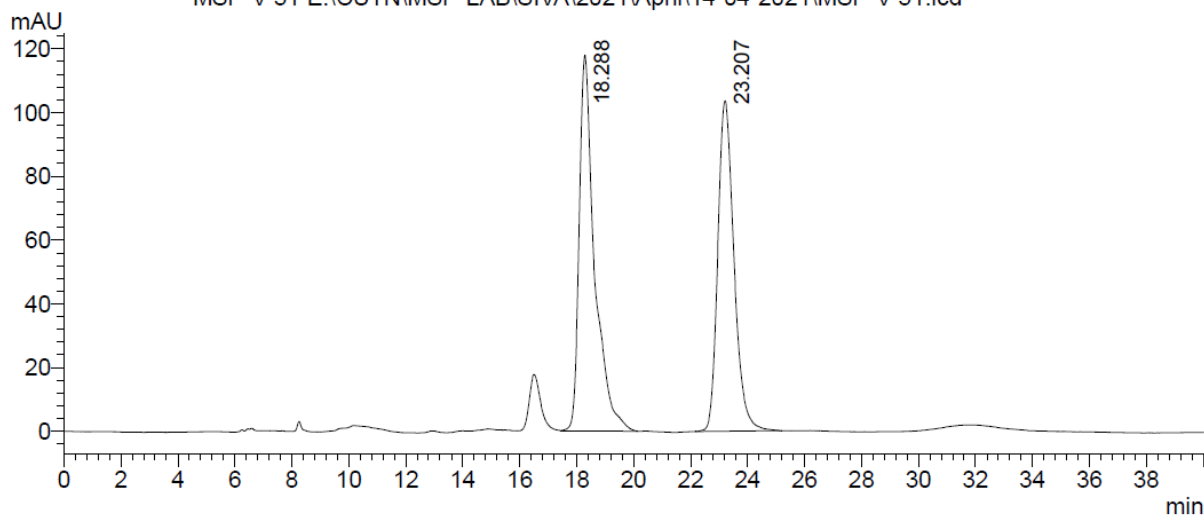

PDA Ch1 254nm

| Peak # | Ret. Time (min) | Area    | Height | Area%   |
|--------|-----------------|---------|--------|---------|
| 1      | 18.288          | 4416069 | 117848 | 51.892  |
| 2      | 23.207          | 4094091 | 103580 | 48.108  |
| Total  |                 | 8510160 | 221428 | 100.000 |

## HPLC data of chiral **5aay**: 92% *ee*

MSP-V-64 E:\CUTN\MSP-LAB\SIVA\2021\April\14-04-2021\MSP-V-64.lcd

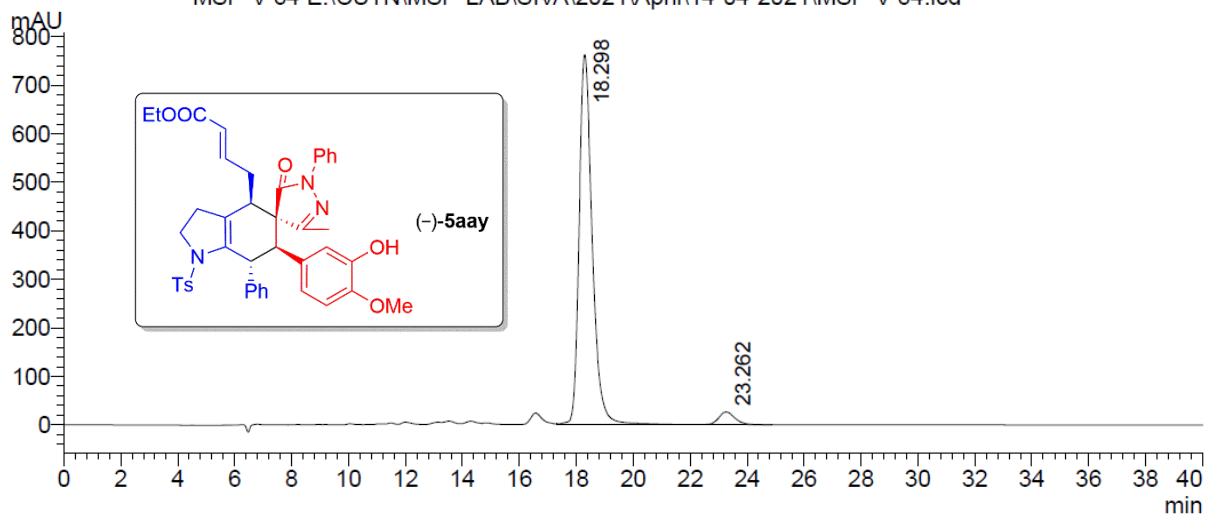

PDA Ch1 254nm

| Peak # | Ret. Time (min) | Area     | Height | Area%   |
|--------|-----------------|----------|--------|---------|
| 1      | 18.298          | 24342213 | 762769 | 96.024  |
| 2      | 23.262          | 1007823  | 25845  | 3.976   |
| Total  |                 | 25350037 | 788613 | 100.000 |

## HPLC data of racemic **5aaz**

MSP-V-10 E:\CUTN\MSP-LAB\SIVA\2020\december\24-12-2020\MSP-V-10.lcd

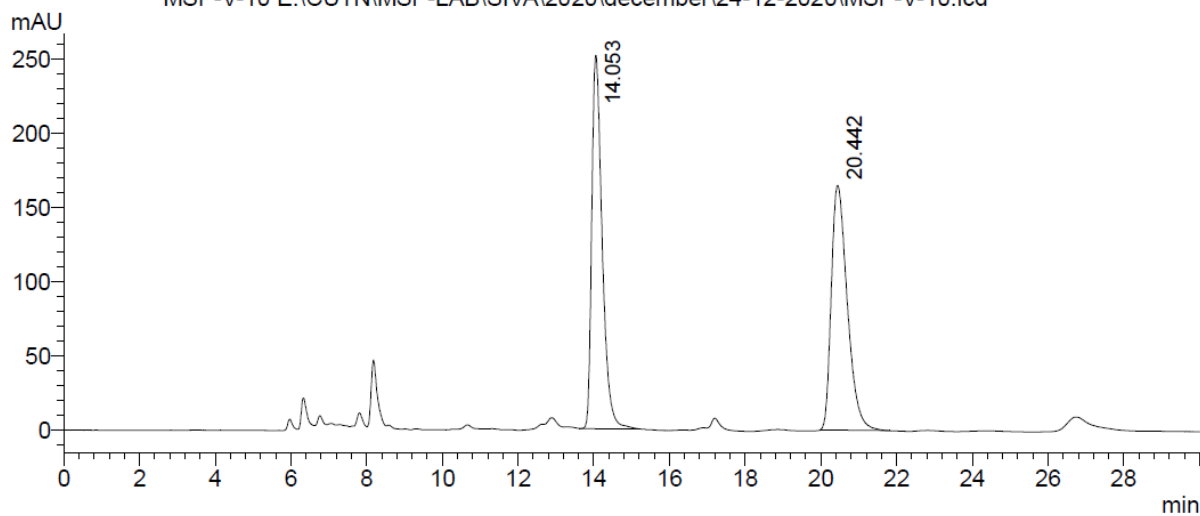

PDA Ch1 254nm

| Peak # | Ret. Time (min) | Area    | Height | Area%   |
|--------|-----------------|---------|--------|---------|
| 1      | 14.053          | 4817456 | 251655 | 49.831  |
| 2      | 20.442          | 4850222 | 165087 | 50.169  |
| Total  |                 | 9667677 | 416742 | 100.000 |

## HPLC data of chiral **5aaz**: 96% *ee*

MSP-IV-88-2 E:\CUTN\MSP-LAB\SIVA\2020\december\24-12-2020\MSP-IV-88-2.lcd

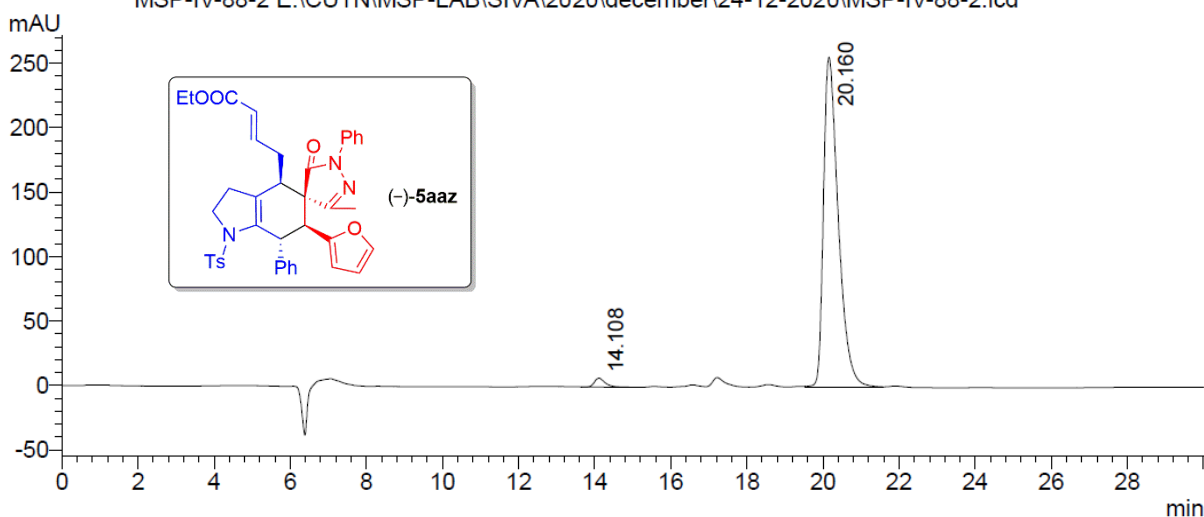

PDA Ch1 254nm

| Peak # | Ret. Time (min) | Area    | Height | Area%   |
|--------|-----------------|---------|--------|---------|
| 1      | 14.108          | 135079  | 6875   | 1.920   |
| 2      | 20.160          | 6901364 | 255801 | 98.080  |
| Total  |                 | 7036443 | 262676 | 100.000 |

### HPLC data of racemic **5aaa'**

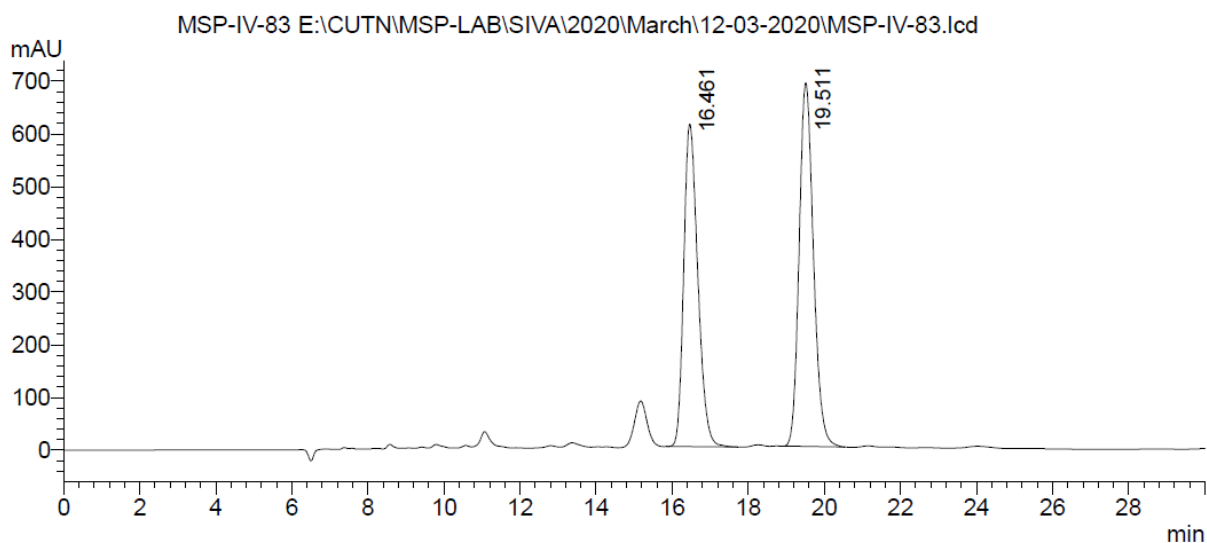

PDA Ch1 254nm

| Peak # | Ret. Time (min) | Area     | Height  | Area%   |
|--------|-----------------|----------|---------|---------|
| 1      | 16.461          | 15742370 | 612167  | 46.707  |
| 2      | 19.511          | 17962139 | 689844  | 53.293  |
| Total  |                 | 33704510 | 1302010 | 100.000 |

### HPLC data of chiral **5aaa'**: 96% *ee*

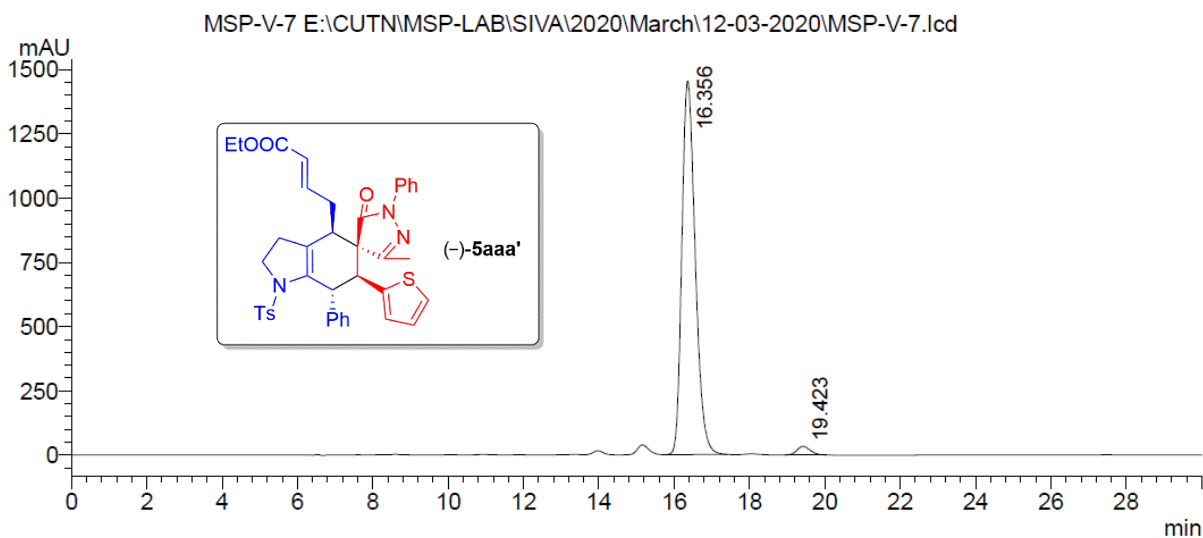

PDA Ch1 254nm

| Peak # | Ret. Time (min) | Area     | Height  | Area%   |
|--------|-----------------|----------|---------|---------|
| 1      | 16.356          | 35826499 | 1452802 | 97.758  |
| 2      | 19.423          | 821500   | 33496   | 2.242   |
| Total  |                 | 36647999 | 1486298 | 100.000 |

## HPLC data of racemic **5aba**

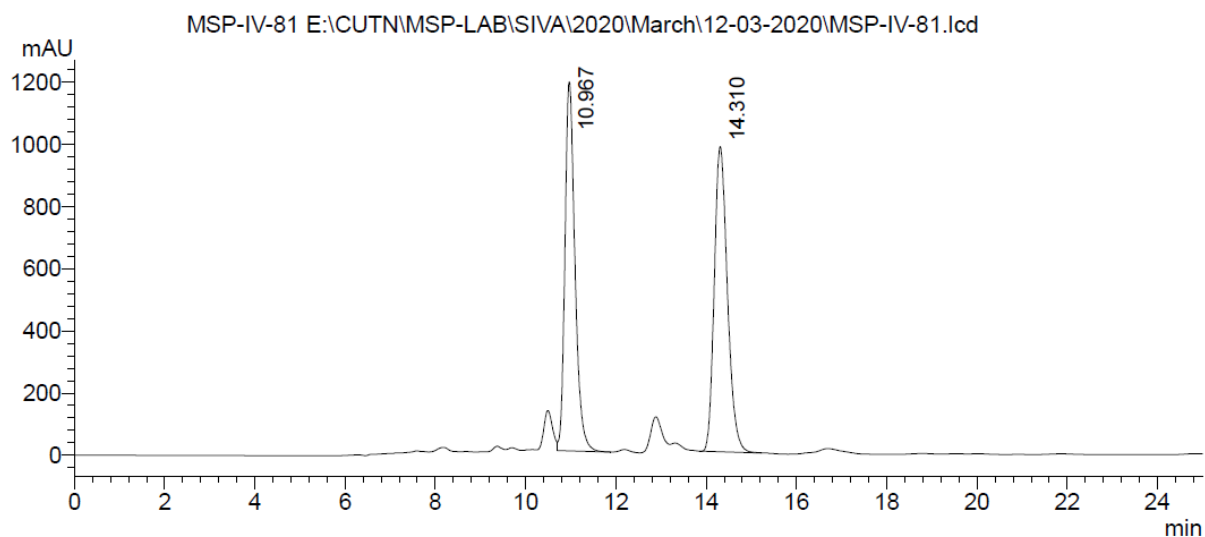

PDA Ch1 254nm

| Peak # | Ret. Time (min) | Area     | Height  | Area%   |
|--------|-----------------|----------|---------|---------|
| 1      | 10.967          | 18317972 | 1187688 | 47.924  |
| 2      | 14.310          | 19905345 | 982619  | 52.076  |
| Total  |                 | 38223317 | 2170307 | 100.000 |

## HPLC data of chiral **5aba**: 99% *ee*

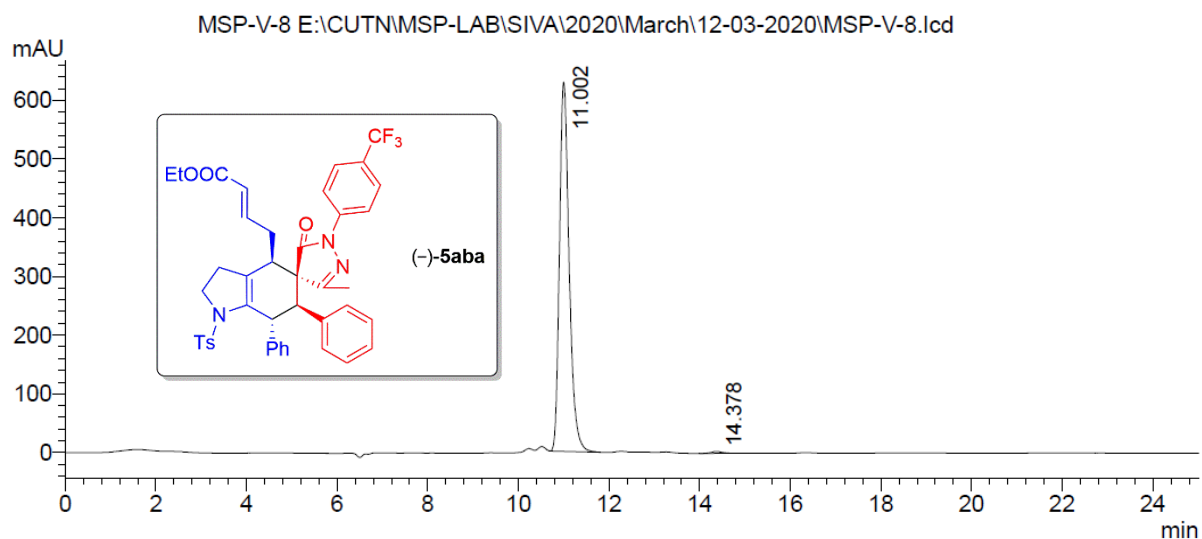

PDA Ch1 254nm

| Peak # | Ret. Time (min) | Area    | Height | Area%   |
|--------|-----------------|---------|--------|---------|
| 1      | 11.002          | 9347022 | 628667 | 99.464  |
| 2      | 14.378          | 50326   | 2864   | 0.536   |
| Total  |                 | 9397348 | 631531 | 100.000 |

### HPLC data of racemic **5abb**

MSP-V-4-3 E:\CUTN\MSP-LAB\SIVA\2020\december\24-12-2020\MSP-V-4-3.lcd

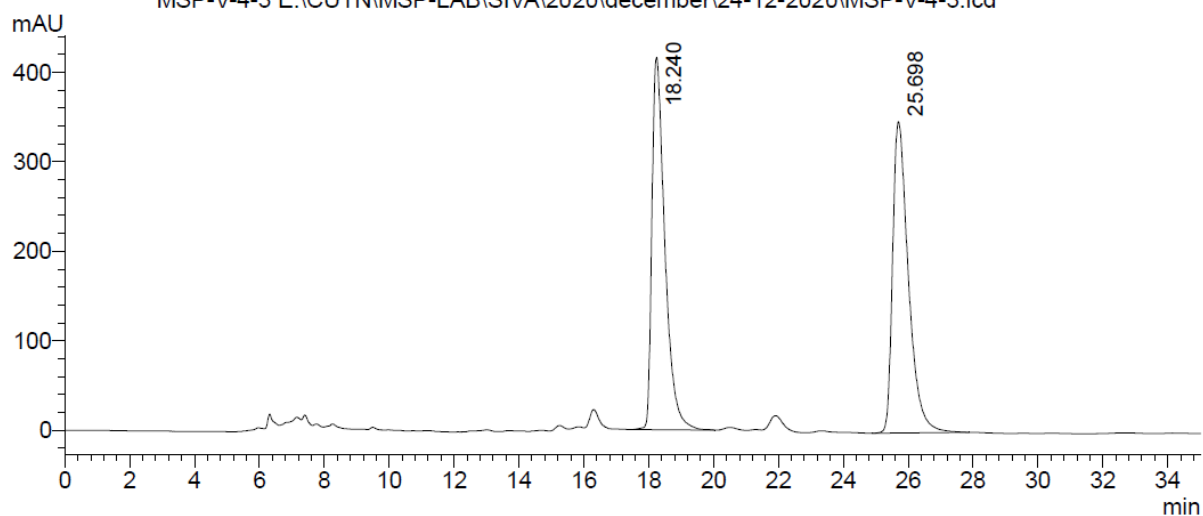

PDA Ch1 254nm

| Peak # | Ret. Time (min) | Area     | Height | Area%   |
|--------|-----------------|----------|--------|---------|
| 1      | 18.240          | 11551133 | 415805 | 49.522  |
| 2      | 25.698          | 11774240 | 347832 | 50.478  |
| Total  |                 | 23325373 | 763636 | 100.000 |

### HPLC data of chiral **5abb**: 95% *ee*

MSP-V-9-2 E:\CUTN\MSP-LAB\SIVA\2020\december\24-12-2020\MSP-V-9-2.lcd

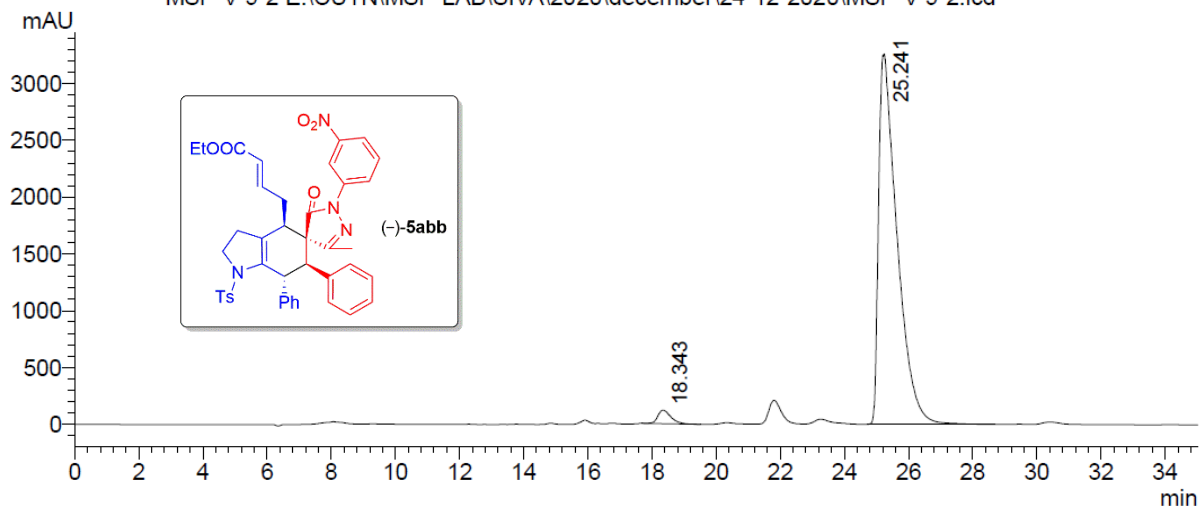

PDA Ch1 254nm

| Peak # | Ret. Time (min) | Area      | Height  | Area%   |
|--------|-----------------|-----------|---------|---------|
| 1      | 18.343          | 3379093   | 119057  | 2.528   |
| 2      | 25.241          | 130283510 | 3258782 | 97.472  |
| Total  |                 | 133662602 | 3377839 | 100.000 |

### HPLC data of racemic **5abc**

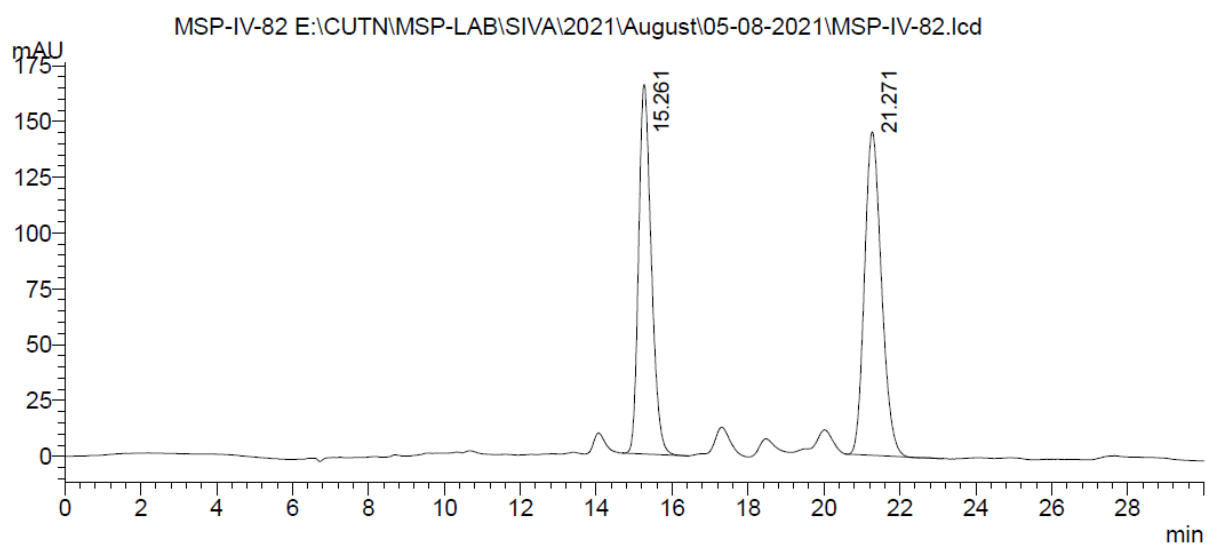

PDA Ch1 254nm

| Peak # | Ret. Time (min) | Area    | Height | Area%   |
|--------|-----------------|---------|--------|---------|
| 1      | 15.261          | 3844521 | 165617 | 45.973  |
| 2      | 21.271          | 4518125 | 144962 | 54.027  |
| Total  |                 | 8362646 | 310579 | 100.000 |

### HPLC data of chiral **5abc**: 88% *ee*

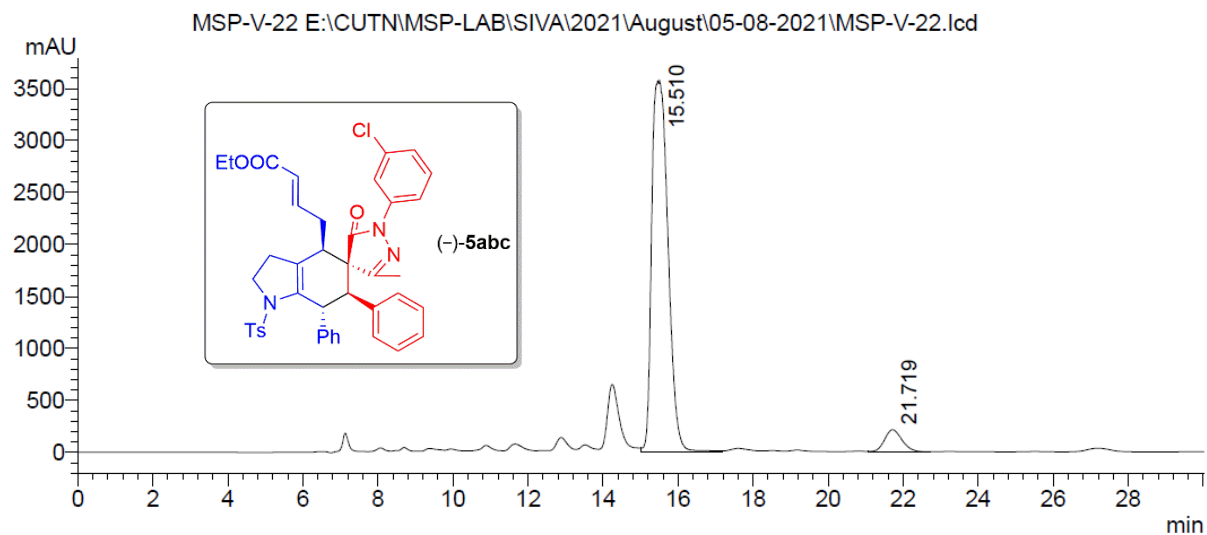

PDA Ch1 254nm

| Peak # | Ret. Time (min) | Area      | Height  | Area%   |
|--------|-----------------|-----------|---------|---------|
| 1      | 15.510          | 108796156 | 3581205 | 94.116  |
| 2      | 21.719          | 6801833   | 211466  | 5.884   |
| Total  |                 | 115597989 | 3792671 | 100.000 |



### HPLC data of racemic **5baa**

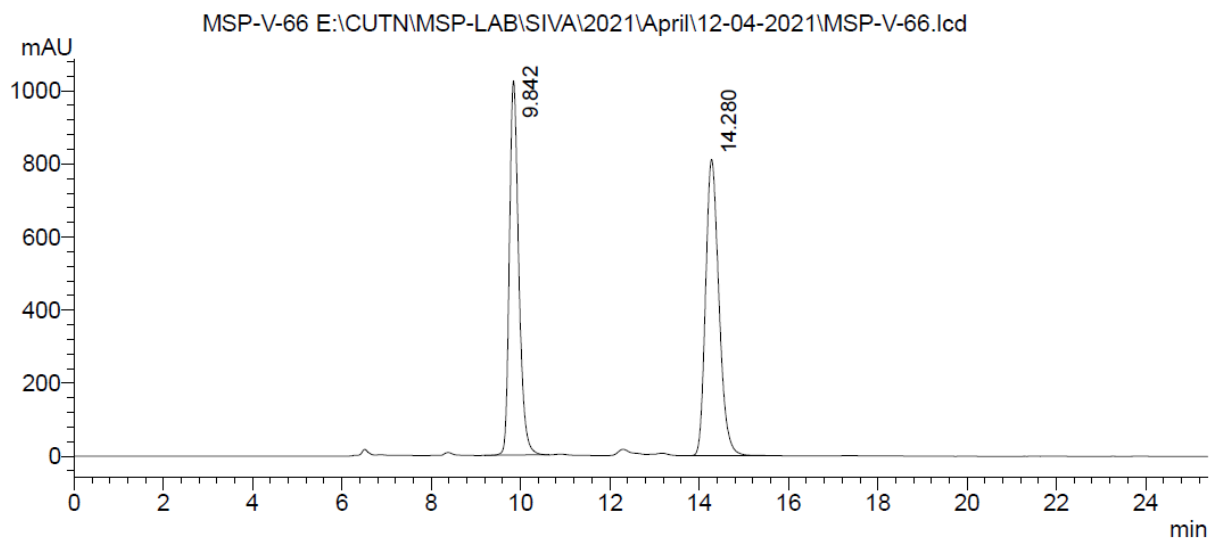

PDA Ch1 254nm

| Peak # | Ret. Time (min) | Area     | Height  | Area%   |
|--------|-----------------|----------|---------|---------|
| 1      | 9.842           | 14953528 | 1023619 | 47.011  |
| 2      | 14.280          | 16855011 | 810242  | 52.989  |
| Total  |                 | 31808538 | 1833860 | 100.000 |

### HPLC data of chiral **5baa**: 97% *ee*

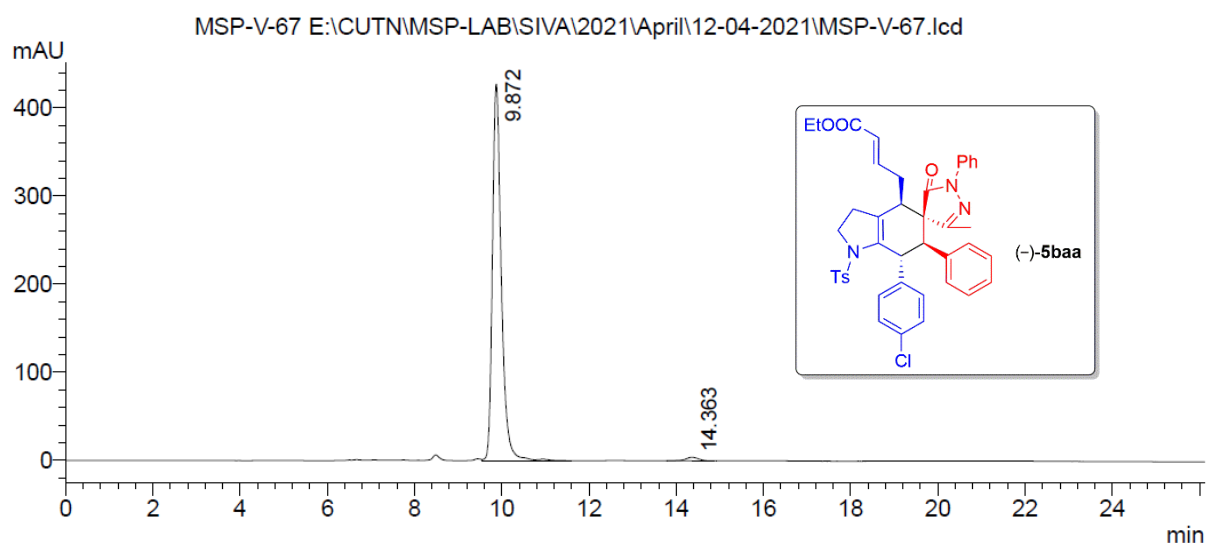

PDA Ch1 254nm

| Peak # | Ret. Time (min) | Area    | Height | Area%   |
|--------|-----------------|---------|--------|---------|
| 1      | 9.872           | 6074819 | 427207 | 98.582  |
| 2      | 14.363          | 87353   | 4186   | 1.418   |
| Total  |                 | 6162172 | 431393 | 100.000 |

### HPLC data of racemic **5caa**

MSP-V-71 E:\CUTN\MSP-LAB\SIVA\2021\April\12-04-2021\MSP-V-71.lcd

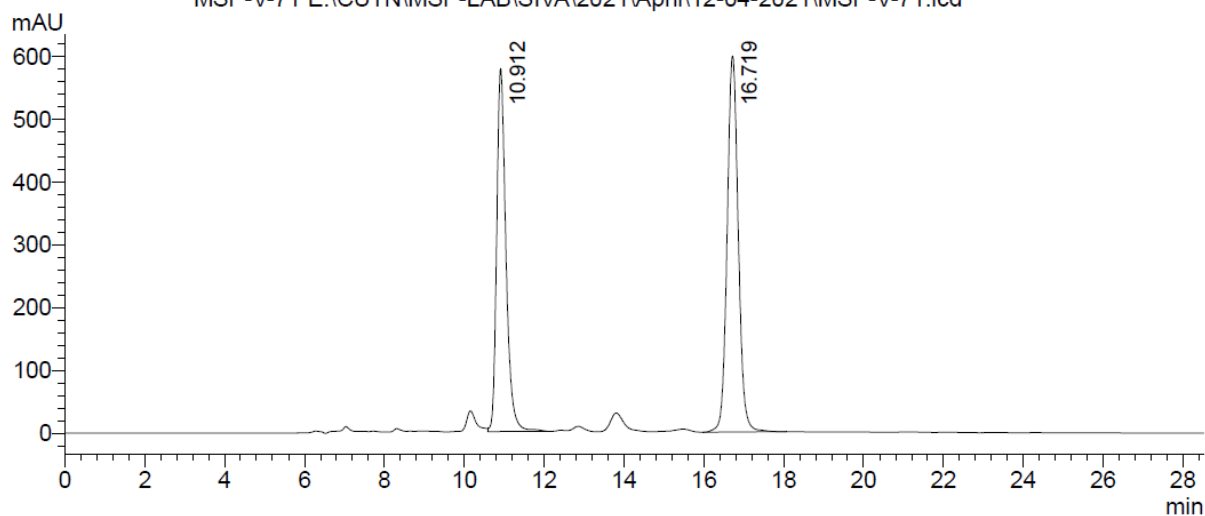

PDA Ch1 254nm

| Peak # | Ret. Time (min) | Area     | Height  | Area%   |
|--------|-----------------|----------|---------|---------|
| 1      | 10.912          | 9345275  | 578690  | 44.598  |
| 2      | 16.719          | 11609317 | 598689  | 55.402  |
| Total  |                 | 20954593 | 1177379 | 100.000 |

### HPLC data of chiral **5caa**: 97% *ee*

MSP-V-70 E:\CUTN\MSP-LAB\SIVA\2021\April\12-04-2021\MSP-V-70.lcd

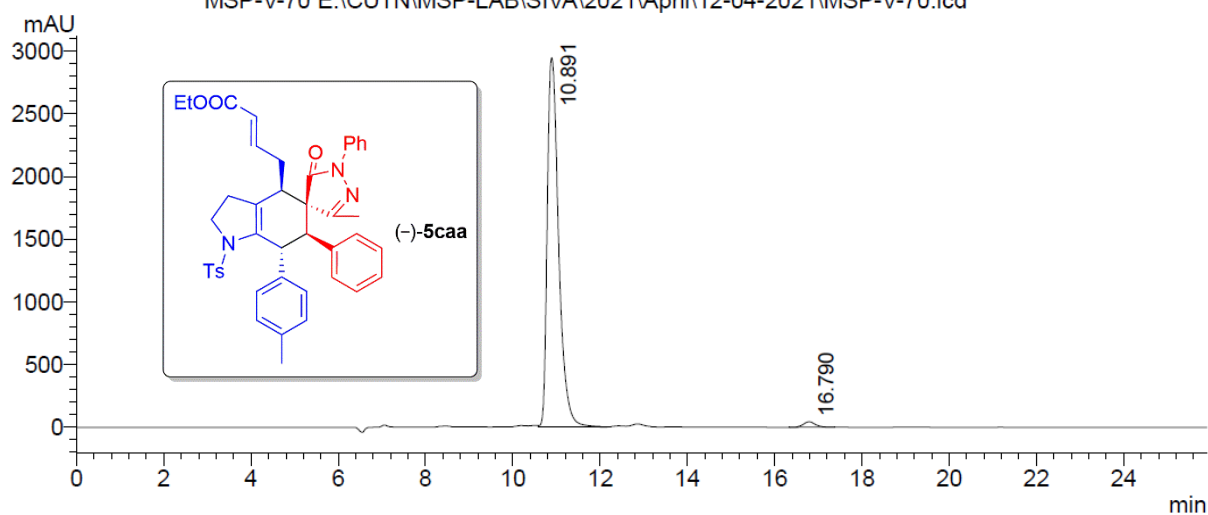

PDA Ch1 254nm

| Peak # | Ret. Time (min) | Area     | Height  | Area%   |
|--------|-----------------|----------|---------|---------|
| 1      | 10.891          | 53342401 | 2942638 | 98.456  |
| 2      | 16.790          | 836396   | 42967   | 1.544   |
| Total  |                 | 54178797 | 2985605 | 100.000 |

### HPLC data of racemic **5abd**

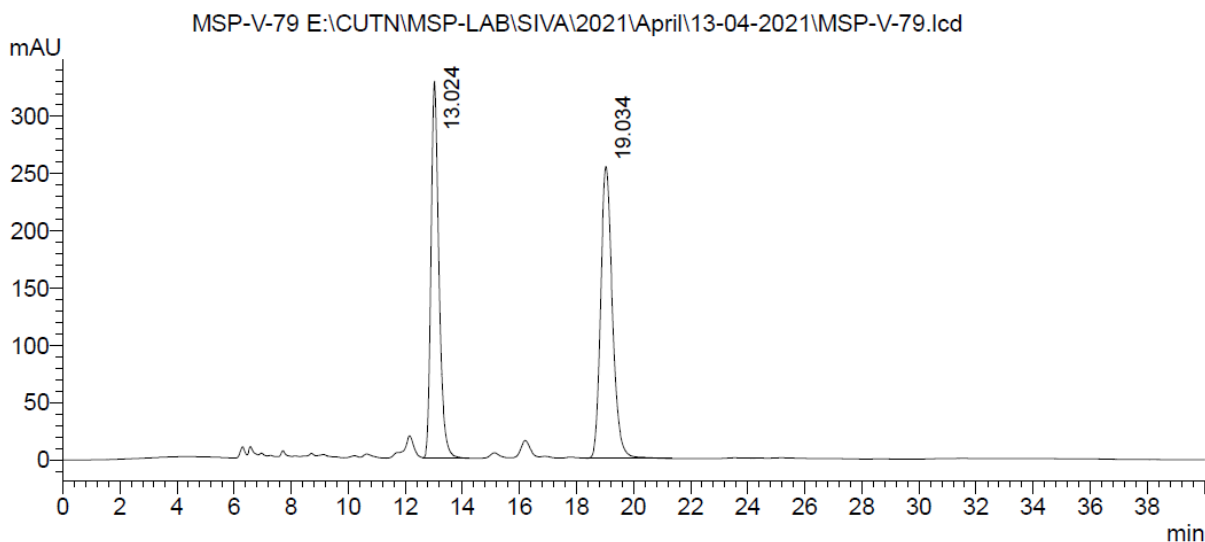

PDA Ch1 254nm

| Peak # | Ret. Time (min) | Area     | Height | Area%   |
|--------|-----------------|----------|--------|---------|
| 1      | 13.024          | 6381584  | 328980 | 46.629  |
| 2      | 19.034          | 7304241  | 254842 | 53.371  |
| Total  |                 | 13685825 | 583822 | 100.000 |

### HPLC data of chiral **5abd**: 99.9% *ee*

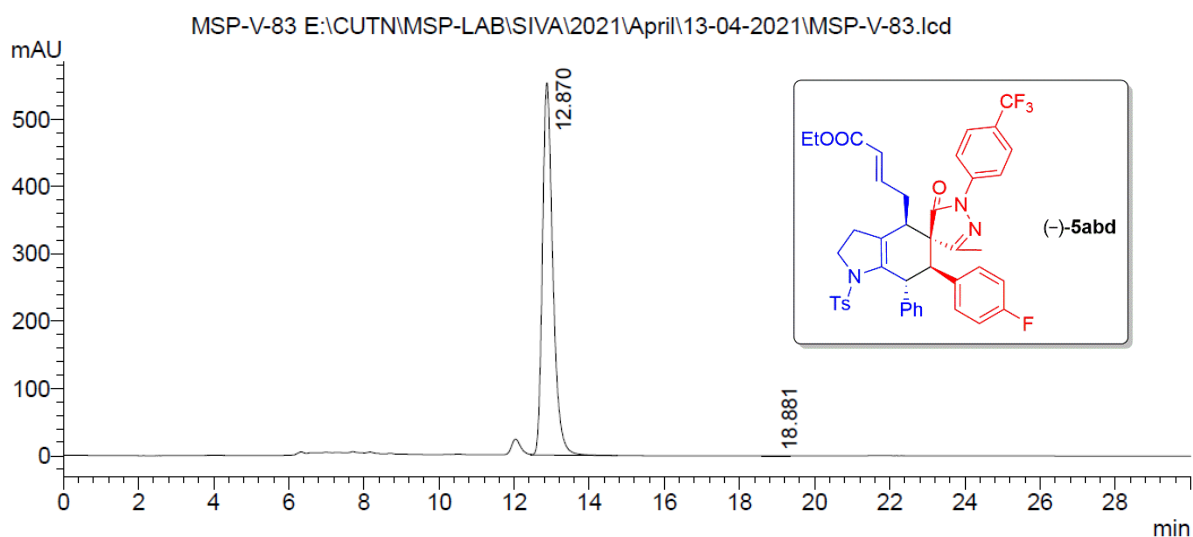

PDA Ch1 254nm

| Peak # | Ret. Time (min) | Area     | Height | Area%   |
|--------|-----------------|----------|--------|---------|
| 1      | 12.870          | 10665156 | 552744 | 99.971  |
| 2      | 18.881          | 3061     | 142    | 0.029   |
| Total  |                 | 10668218 | 552886 | 100.000 |

### HPLC data of racemic **5abe**

MSP-V-80 E:\CUTN\MSP-LAB\SIVA\2021\April\13-04-2021\MSP-V-80.lcd

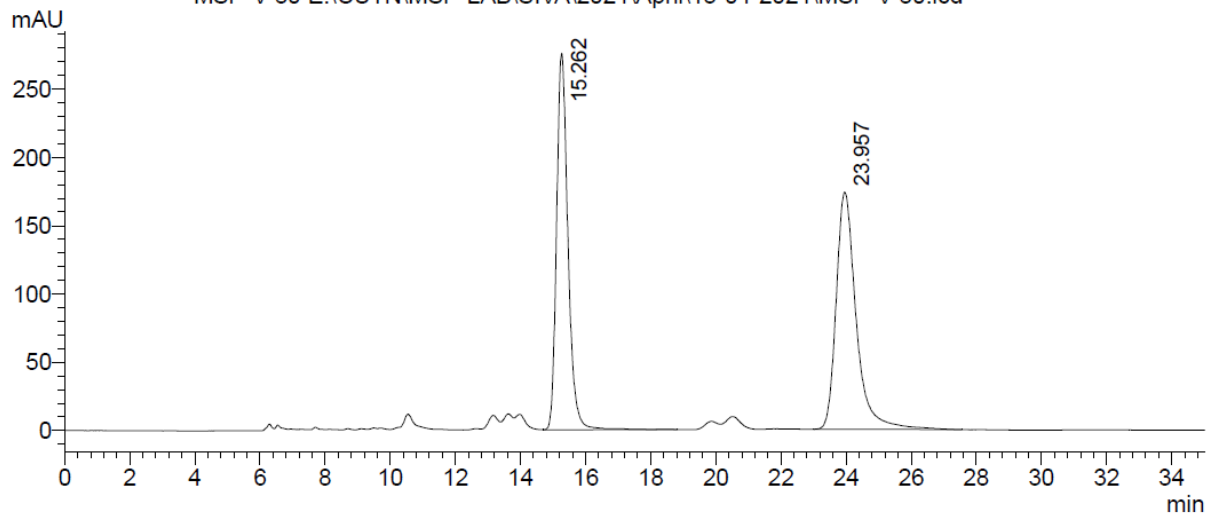

PDA Ch1 254nm

| Peak # | Ret. Time (min) | Area     | Height | Area%   |
|--------|-----------------|----------|--------|---------|
| 1      | 15.262          | 6702558  | 275624 | 47.457  |
| 2      | 23.957          | 7420971  | 173599 | 52.543  |
| Total  |                 | 14123529 | 449223 | 100.000 |

### HPLC data of chiral **5abe**: 98% *ee*

MSP-V-84 E:\CUTN\MSP-LAB\SIVA\2021\April\13-04-2021\MSP-V-84.lcd

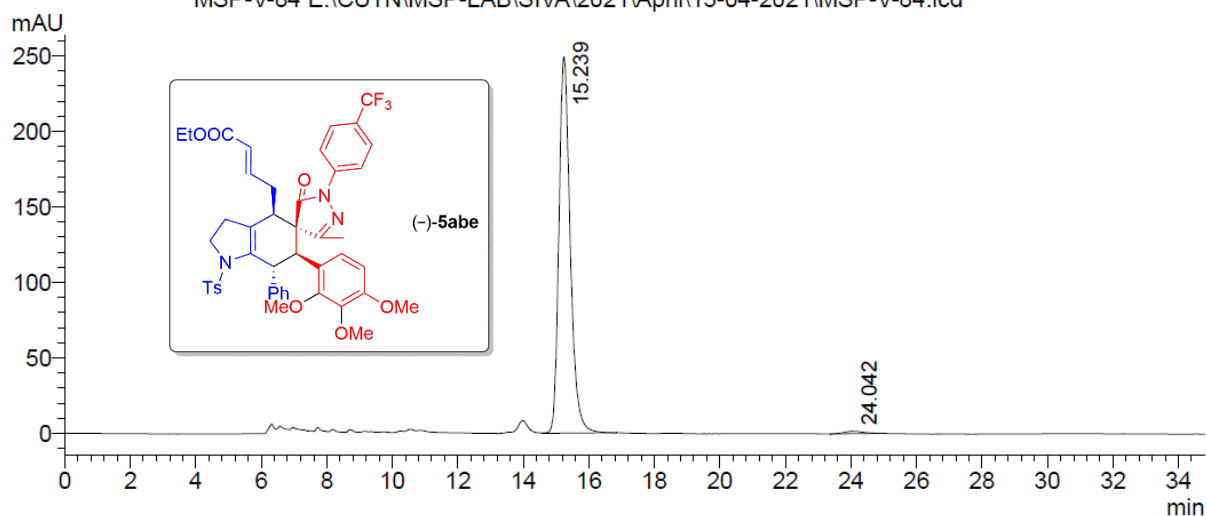

PDA Ch1 254nm

| Peak # | Ret. Time (min) | Area    | Height | Area%   |
|--------|-----------------|---------|--------|---------|
| 1      | 15.239          | 5992942 | 249307 | 98.870  |
| 2      | 24.042          | 68513   | 1604   | 1.130   |
| Total  |                 | 6061454 | 250911 | 100.000 |

### HPLC data of racemic **7aaa**

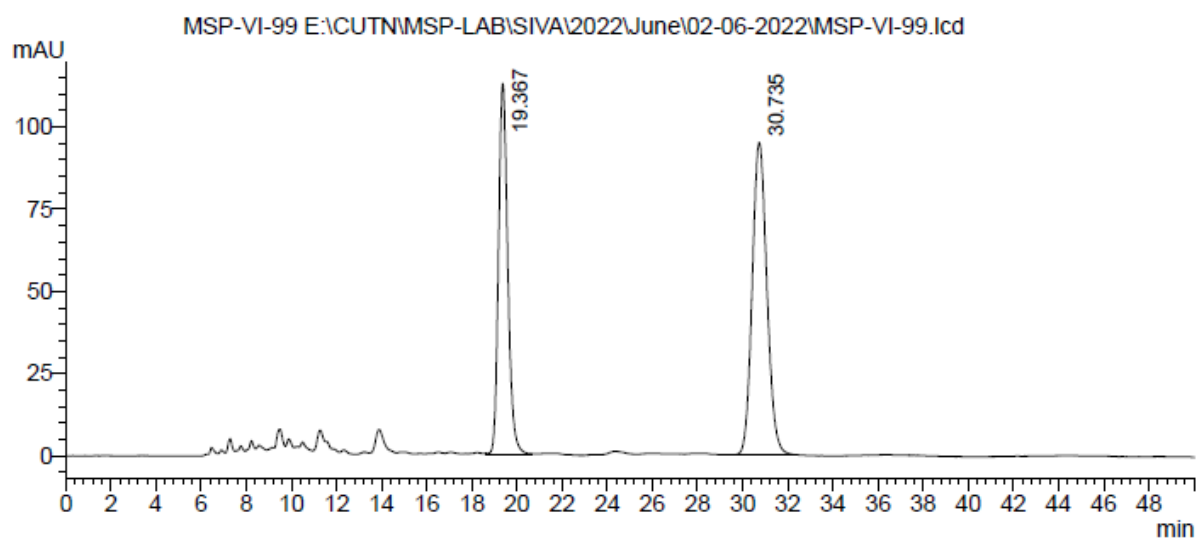

PDA Ch1 254nm

| Peak # | Ret. Time (min) | Area    | Height | Area%   |
|--------|-----------------|---------|--------|---------|
| 1      | 19.367          | 3193490 | 112501 | 42.702  |
| 2      | 30.735          | 4285013 | 94865  | 57.298  |
| Total  |                 | 7478503 | 207366 | 100.000 |

### HPLC data of chiral **7aaa**: 92% *ee*

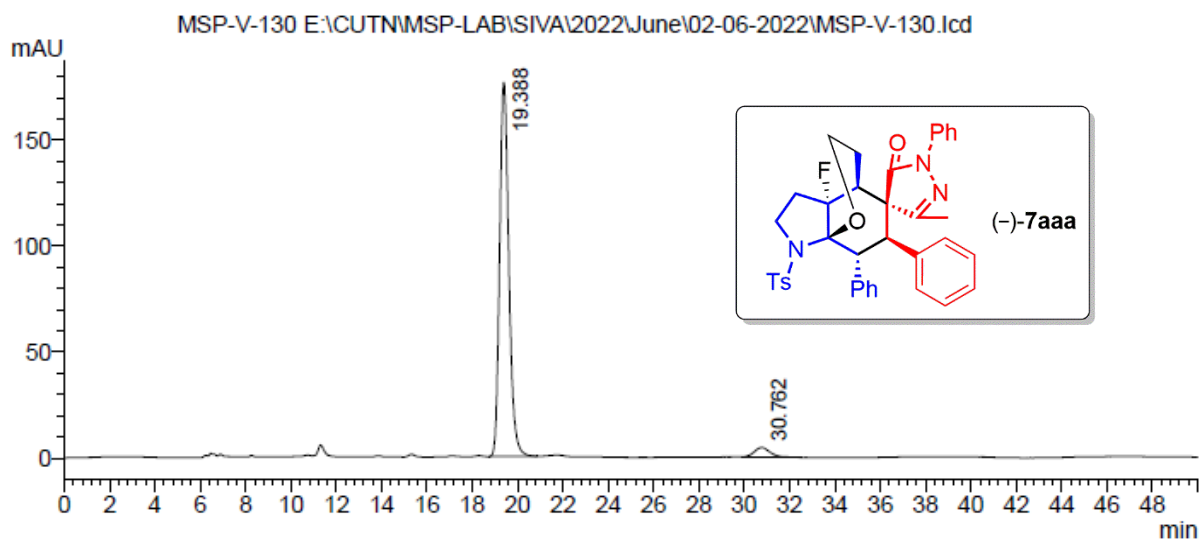

PDA Ch1 254nm

| Peak # | Ret. Time (min) | Area    | Height | Area%   |
|--------|-----------------|---------|--------|---------|
| 1      | 19.388          | 4993491 | 176620 | 95.850  |
| 2      | 30.762          | 216203  | 4504   | 4.150   |
| Total  |                 | 5209695 | 181124 | 100.000 |
