# Supplementary material for: Aminocatalytic asymmetric [4 + 2]-annulation to access functionally rich hexahydrospiroindole pyrazolones
Source: Royal Society of Chemistry journal article supplement (doi:10.1039/d2ob01085b), 2022-01-01
Supplement: d2ob01085b1.zip [file d2ob01085b1.zip]

## Supporting Information-I

### Aminocatalytic asymmetric [4+2]-annulation to access functionally rich hexahydrospiroindole pyrazolones

Madavi S. Prasad,\* Murugesan Sivaprakash, and A. Palanichamy

*Asymmetric Synthesis and Catalysis Laboratory, Department of Chemistry, Central University of Tamil Nadu, Thiruvarur, 610 005, India*

[shivaprasad@cutn.ac.in](mailto:shivaprasad@cutn.ac.in) and [shivacutn@gmail.com](mailto:shivacutn@gmail.com)

#### Table of Contents

---

|                                                |         |
|------------------------------------------------|---------|
| 1. General experimental procedures             | S2-S3   |
| 2. Characterization data for products          | S5-S29  |
| 3. Single Crystal X-ray data for compound 5aai | S30-S31 |



## 1. EXPERIMENTAL SECTION

### 1.1 General Experimental Procedures

*Nuclear Magnetic Resonance Spectroscopy:*  $^1\text{H}$  NMR spectra were acquired on Bruker AVIII400 (400 MHz) spectrometer and were referenced to TMS and residual non-deuterated solvent peak in  $\text{CDCl}_3$  ( $\delta = 7.26$ ). Chemical shifts ( $\delta\text{H}$  and  $\delta\text{C}$ ) are reported in parts per million (ppm), with signal splitting recorded as singlet (s), doublet (d), triplet (t), quartet (q), quintet (quint), and multiplet and unresolved peaks (m). Coupling constants ( $J$ ) are mentioned in Hz and are presented as observed.  $^{13}\text{C}$  NMR spectra were obtained on Bruker AVIII400 (100 MHz) spectrometers and were referenced to solvent peaks in  $\text{CDCl}_3$  ( $\delta = 77.0$ ). Where diastereomeric mixtures are formed, data is given for the major diastereomer.

*Mass Spectrometry:* High-resolution mass spectra (HRMS) were recorded by the Thermo Fisher spectrometer using electrospray ionization ( $\text{ESI}^+$ ). The parent ion  $[\text{M}+\text{H}]^+$   $[\text{M}+\text{Na}]^+$  is calculated to 4 decimal places from the molecular formula, and all values are within a tolerance of 5 ppm.

*Specific rotations:* Optical rotations were recorded on an Anton Parr MCP100 polarimeter with a path length of 1 dm (using the sodium D line, 589 nm). Specific rotations ( $[\alpha]_D$ ) are reported in units of  $10^{-1} \text{ deg cm}^2 \text{ g}^{-1}$ . Concentrations are reported in g/mL. Temperatures are reported in  $^\circ\text{C}$  (typically  $25^\circ\text{C}$ ).

*Infrared Spectroscopy:* Absorption spectra were obtained on a Shimadzu FT-IR spectrometer. Wavelengths of maximum absorbance ( $\nu_{\text{max}}$ ) are quoted in wavenumbers ( $\text{cm}^{-1}$ ). Only selected characteristic IR absorption data are provided for each compound.

*Single Crystal XRD:* Data was collected from Sophisticated Analytical Instrumental Facility, Indian Institute of Technology Madras- Chennai.

#### Materials:

Unless otherwise stated, all reactions were carried out in oven-dried glassware, using anhydrous reaction solvents. All other commercially available reagents and solvents were either used as received and/or dried and purified before use using standard procedures.

#### General Procedure A: Preparation of pyrrolidine-tethered dienal

**1a-c** were prepared by following the reported literature procedure.<sup>1</sup>

#### General Procedure B: Preparation of pyrazolone olefins

**2aa-2bw** were synthesized using a literature report.<sup>2</sup> All the NMR's were consistent with the literature.



**General Procedure C: Aminocatalytic [4+2]-annulation:**

To an oven dried vial containing catalyst **3a** (0.2 equiv.), benzoic acid (0.2 equiv.) and the pyrazolone olefin (1.0 equiv.) was added the pyrrolidine-tethered dienal (1.2 equiv.) in toluene (0.13M). The resulting mixture was stirred at RT for 5-12 hours, the crude product was directly purified by column chromatography.

**General Procedure D: Aminocatalytic [4+2]-annulation followed by one pot Wittig reaction:**

To an oven dried vial containing catalyst **3a** (0.2 equiv.), benzoic acid (0.2 equiv.) and the pyrazolone olefin (1.0 equiv.) was added the pyrrolidine-tethered dienal (1.2 equiv.) in toluene (0.13M). The resulting mixture was stirred at RT for 5-12 hours, then (ethoxycarbonylmethylene)triphenylphosphorane (0.15 mmol, 1.5 equiv.) was added. The reaction was then stirred for 2 hours, the crude product was directly purified by column chromatography.

**General Procedure E: Ramachary Reductive Coupling (RRC) Reaction:**

Into a glass vial L-proline (0.2 eq) was treated with product (-)-**4aaa** (1.0 eq), malononitrile (1.0 eq.) and Hantzsch ester (1.0 eq.) in DCM as a solvent. After the completion of the reaction crude mixture was purified using column chromatography and the resulting product (-)-**6aaa** was obtained as a yellow solid.<sup>3</sup>

**General Procedure F: NaBH<sub>4</sub> reduction followed by fluoroetherification**

Into a 10 ml RBF (-)-**4aaa** was taken in MeOH and NaBH<sub>4</sub> was added under N<sub>2</sub>. After the completion of the reaction, the crude product was quenched using sat. NaHCO<sub>3</sub> solution and extracted with EtOAc. Then the concentrated material was treated with select fluor (F<sup>+</sup> source) and NaHCO<sub>3</sub> in ACN yielded the fluorinated octahydrospiroindole pyrazolone (-)-**7aaa**.<sup>4</sup>

**Synthetic Route of the Dienals (1a-1c)**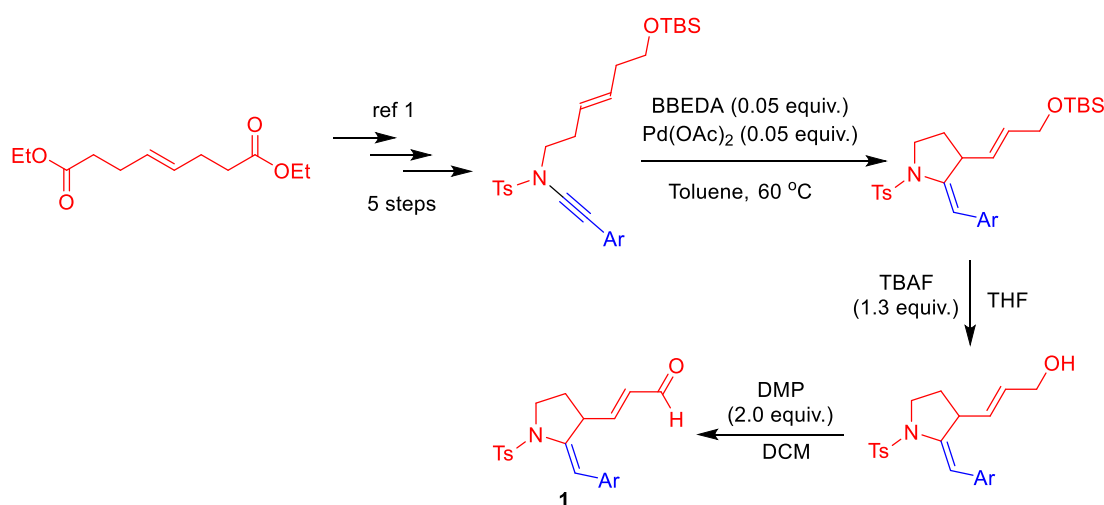**References**



- 1) a) D. C. Braddock, R. Bhuvu, D. S. Millan, Y. Perez-Fuertes, C. A. Roberts, R. N. Shepperd, S. Solanki, E. S. E. Stokes, A. J. P. White, *Org. Lett.* 2007, **9**, 3, 445-448. b) V. Chintalapudi, E. A. Galvin, R. L. Greenaway, E. A. Anderson, *Chem. Commun.*, 2016, **52**, 693. c) A. Mekareeya, P. R. Walker, A. Couce-Rios, C. D. Campbell, A. Steven, R. S. Paton, E. A. Anderson, *J. Am. Chem. Soc.*, 2017, **139**, 10104–10114.
- 2) Y. Zhou, N. Chen, Y. Cheng, X. Cai, *J. Vis. Exp.*, 2019, **144**, 59155.
- 3) a) D. B. Ramachary and M. Kishor, *J. Org. Chem.*, 2007, **72**, 5056; (b) D. B. Ramachary and Y. V. Reddy, *J. Org. Chem.*, 2010, **75**, 74; (c) D. B. Ramachary and M. Kishor, *Org. Biomol. Chem.*, 2010, **8**, 2859 and references cited therein. d) D. B. Ramachary, M. A. Pasha, G. Thirupathi, *Angew. Chem., Int. Ed.*, 2017, **56**, 12930–12934.
- 4) a) O. Lozano, G. Blessley, T. M. D Campo, A. L. Thompson, G. T. Giuffredi, M. Bettati, M. Walker, R. Borman, V. R. Gouverneur, *Angew. Chem.*, 2011, **123**, 8255-8259



### Characterization data

#### (E)-N-(6-((tert-butyldimethylsilyl)oxy)hex-3-en-1-yl)-4-methyl-N-(phenylethynyl)benzenesulfonamide:

Prepared by following general procedure **A** purified by column chromatography using EtOAc/hexane

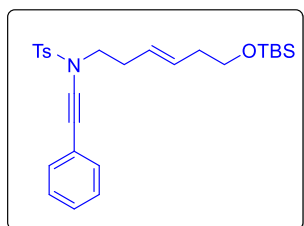

and isolated product in 59% yield as a pale-yellow liquid. IR (neat)  $\nu_{\max}$  2927, 2235, 1598, 1462, 1168, 1089 and 752.  $\text{cm}^{-1}$ ;  $^1\text{H}$  NMR (400 MHz,  $\text{CDCl}_3$ )  $\delta$  7.83 (2H, d,  $J = 8$  Hz), 7.37-7.33 (4H, m), 7.31-7.25 (3H, m), 5.54-5.34 (2H, m), 3.58 (2H, t,  $J = 6.8$  Hz), 3.42 (2H, t,  $J = 7.6$  Hz), 2.44 (3H, s), 2.39 (2H, q,  $J = 6.8$  Hz), 2.17 (2H, q,  $J = 6.8$  Hz), 0.88 (9H, s), 0.036 (6H, s);  $^{13}\text{C}$  NMR (100 MHz,  $\text{CDCl}_3$ , DEPT-135)  $\delta$  144.6 (C), 134.7 (C), 131.4 (2CH), 130.3 (CH), 129.8 (2CH), 128.3 (2CH), 127.8 (CH), 127.7 (2CH), 127.0 (CH), 122.9 (C), 82.3 (C), 70.9 (C), 63.0 ( $\text{CH}_2$ ), 51.4 ( $\text{CH}_2$ ), 36.3 ( $\text{CH}_2$ ), 31.4 ( $\text{CH}_2$ ), 26.0 (3 $\text{CH}_3$ ), 21.7 ( $\text{CH}_3$ ), 18.4 (C), -5.22 (2 $\text{CH}_3$ ); HRMS (ESI)  $m/z$ : 484.2336 [ $\text{M} + \text{H}$ ] $^+$ , calcd for  $\text{C}_{27}\text{H}_{38}\text{NO}_3\text{SSi}$ ; Found 484.2337.

#### (E)-N-(6-((tert-butyldimethylsilyl)oxy)hex-3-en-1-yl)-N-((4-chlorophenyl)ethynyl)-4-methylbenzenesulfonamide:

Prepared by following general procedure **A** purified by column chromatography using EtOAc/hexane

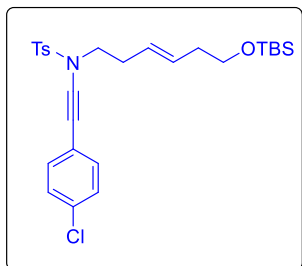

and isolated product in 56% yield as a pale-yellow liquid. IR (neat)  $\nu_{\max}$  2927, 2235, 1492, 1367, 1253, 1168, 1089 and 773.  $\text{cm}^{-1}$ ;  $^1\text{H}$  NMR (400 MHz,  $\text{CDCl}_3$ )  $\delta$  7.81 (2H, d,  $J = 8$  Hz), 7.35 (2H, d,  $J = 8$  Hz), 7.30-7.24 (4H, m), 5.54-5.33 (2H, m), 3.58 (2H, t,  $J = 6.8$  Hz), 3.41 (2H, t,  $J = 7.2$  Hz), 2.45 (3H, s), 2.37 (2H, q,  $J = 6.7$  Hz), 2.17 (2H, q,  $J = 6.8$  Hz), 0.88 (9H, s), 0.035 (6H, s);  $^{13}\text{C}$  NMR (100 MHz,  $\text{CDCl}_3$ , DEPT-135)  $\delta$  144.7 (C), 143.6 (C), 133.7 (C), 132.5 (2CH), 130.7 (CH), 129.8 (2CH), 128.6 (2CH), 127.7 (2CH), 126.9 (CH), 121.4 (C), 83.2 (C), 70.0 (C), 62.9 ( $\text{CH}_2$ ), 51.3 ( $\text{CH}_2$ ), 36.3 ( $\text{CH}_2$ ), 31.4 ( $\text{CH}_2$ ), 26.0 (3 $\text{CH}_3$ ), 21.7 ( $\text{CH}_3$ ), 18.4 (C), -5.23 (2 $\text{CH}_3$ ); HRMS (ESI)  $m/z$ : 540.1766 [ $\text{M} + \text{Na}$ ] $^+$ , calcd for  $\text{C}_{27}\text{H}_{36}\text{NO}_3\text{ClNaSSi}$ ; Found 540.1778.

#### (E)-N-(6-((tert-butyldimethylsilyl)oxy)hex-3-en-1-yl)-4-methyl-N-(p-tolyethynyl)benzenesulfonamide:

Prepared by following general procedure **A** purified by column chromatography using EtOAc/hexane

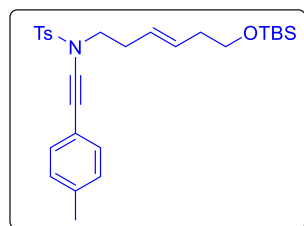

and isolated product in 53% yield as a pale-yellow liquid. IR (neat)  $\nu_{\max}$  2927, 1597, 1367, 1168, 1089 and 812.  $\text{cm}^{-1}$ ;  $^1\text{H}$  NMR (400 MHz,  $\text{CDCl}_3$ )  $\delta$  7.83 (2H, d,  $J = 8$  Hz), 7.34 (2H, d,  $J = 8.4$  Hz), 7.26 (2H, d,  $J = 8$  Hz), 7.09 (2H, d,  $J = 8$  Hz), 5.54-5.34 (2H, m), 3.58 (2H, t,  $J = 6.8$  Hz), 3.40 (2H, t,  $J = 7.6$  Hz), 2.44 (3H, s), 2.38 (2H, q,  $J = 7.2$  Hz), 2.34 (3H, s), 2.17 (2H, q,  $J = 6.8$  Hz), 0.88 (9H, s), 0.035 (6H, s);  $^{13}\text{C}$  NMR (100 MHz,  $\text{CDCl}_3$ ,



DEPT-135)  $\delta$  144.5 (C), 138.0 (C), 134.7 (C), 131.5 (2CH), 130.2 (CH), 129.7 (2CH), 129.0 (2CH), 127.7 (2CH), 127.1 (CH), 119.7 (C), 81.5 (C), 70.8 (C), 63.0 (CH<sub>2</sub>), 51.4 (CH<sub>2</sub>), 36.3 (CH<sub>2</sub>), 31.3 (CH<sub>2</sub>), 26.0 (3CH<sub>3</sub>), 21.7 (CH<sub>3</sub>), 21.5 (CH<sub>3</sub>), 18.4 (C), -5.23 (2CH<sub>3</sub>); HRMS (ESI)  $m/z$ : 520.2312 [M + Na]<sup>+</sup>, calcd for C<sub>28</sub>H<sub>39</sub>NO<sub>3</sub>NaSSi; Found 520.2313.

### 2-((*E*-benzylidene)-3-((*E*-3-((*tert*-butyldimethylsilyl)oxy)prop-1-en-1-yl)-1-tosylpyrrolidine:

Prepared by following general procedure **A** purified by column chromatography using EtOAc/hexane

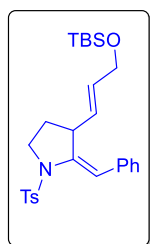

and isolated product in 84% yield as a pale-yellow liquid. IR (neat)  $\nu_{\max}$  2953, 1597, 1359, 1163, 1089 and 833. cm<sup>-1</sup>; <sup>1</sup>H NMR (400 MHz, CDCl<sub>3</sub> 5.5:1 ratio of isomers, major isomer)  $\delta$  7.65 (2H, d,  $J$  = 8.2 Hz), 7.62 (2H, d,  $J$  = 7.4 Hz), 7.34-7.26 (4H, m), 7.19 (1H, q,  $J$  = 7.4 Hz), 5.92 (1H, d,  $J$  = 2 Hz), 5.51 (1H, dt,  $J$  = 4.9, 15.3 Hz), 5.34 (1H, dd,  $J$  = 8.4, 8.4 Hz), 4.14 (2H, dd,  $J$  = 1.4, 3.5 Hz), 3.73-3.66 (1H, m), 3.56-3.49 (1H, m), 2.57 (1H, q,  $J$  = 8.4 Hz), 2.43 (3H, s), 1.84-1.77 (1H, m), 1.48-1.37 (1H, m), 0.91 (9H, s), 0.08

(6H, s); <sup>13</sup>C NMR (100 MHz, CDCl<sub>3</sub>, DEPT-135)  $\delta$  144.1 (C), 140.8 (C), 136.5 (C), 134.6 (C), 132.8 (CH), 129.6 (2CH), 129.3 (CH), 129.0 (2CH), 128.1 (2CH), 127.9 (2CH), 127.0 (CH), 119.0 (CH), 63.5 (CH<sub>2</sub>), 49.3 (CH<sub>2</sub>), 46.4 (CH), 29.0 (CH<sub>2</sub>), 26.1 (3CH<sub>3</sub>), 21.7 (CH<sub>3</sub>), 18.6 (C), -4.99 (2CH<sub>3</sub>); HRMS (ESI)  $m/z$ : 506.2156 [M + Na]<sup>+</sup>, calcd for C<sub>27</sub>H<sub>37</sub>NO<sub>3</sub>NaSSi; Found 506.2156.

### 3-((*E*-3-((*tert*-butyldimethylsilyl)oxy)prop-1-en-1-yl)-2-((*E*-4-chlorobenzylidene)-1-tosylpyrrolidine:

Prepared by following general procedure **A** purified by column chromatography using EtOAc/hexane

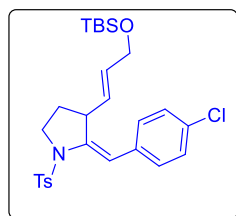

and isolated product in 80% yield as a pale-yellow liquid. IR (neat)  $\nu_{\max}$  2927, 1597, 1359, 1251, 1165, 1089 and 835. cm<sup>-1</sup>; <sup>1</sup>H NMR (400 MHz, CDCl<sub>3</sub>, 8.5:1 ratio of isomers, major isomer)  $\delta$  7.63 (2H, d,  $J$  = 8.2 Hz), 7.53 (2H, d,  $J$  = 8.5 Hz), 7.27 (2H, d,  $J$  = 8.5 Hz), 7.22 (1H, d,  $J$  = 8.5 Hz), 5.86 (1H, d,  $J$  = 2 Hz), 5.52 (1H, dt,  $J$  = 2.2, 15.2 Hz), 5.33 (1H, dd,  $J$  = 8.4, 8.4 Hz), 4.14 (2H, dd,  $J$  = 1.4, 3.4 Hz), 3.73-3.67 (1H, m), 3.56-3.49 (1H, m), 2.57 (1H, q,  $J$  = 8.3 Hz), 2.43

(3H, s), 1.85-1.77 (1H, m), 1.47-1.37 (1H, m), 0.91 (9H, s), 0.07 (6H, s); <sup>13</sup>C NMR (100 MHz, CDCl<sub>3</sub>, DEPT-135)  $\delta$  144.2 (C), 141.5 (C), 134.9 (C), 134.4 (C), 132.9 (CH), 132.2 (C), 130.2 (2CH), 129.6 (2CH), 128.9 (CH), 127.9 (2CH), 127.9 (2CH), 117.5 (CH), 63.3 (CH<sub>2</sub>), 49.3 (CH<sub>2</sub>), 46.4 (CH), 28.8 (CH<sub>2</sub>), 26.0 (3CH<sub>3</sub>), 21.6 (CH<sub>3</sub>), 18.5 (C), -5.1 (2CH<sub>3</sub>); HRMS (ESI)  $m/z$ : 518.1947 [M + H]<sup>+</sup>, calcd for C<sub>27</sub>H<sub>37</sub>NO<sub>3</sub>ClSSi; Found 518.1945.

### 3-((*E*-3-((*tert*-butyldimethylsilyl)oxy)prop-1-en-1-yl)-2-((*E*-4-methylbenzylidene)-1-tosylpyrrolidine:

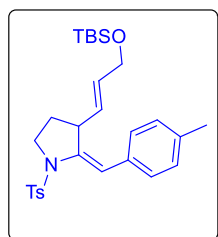

Prepared by following general procedure **A** purified by column chromatography using EtOAc/hexane and isolated product in 78% yield as a pale-yellow liquid. IR (neat)  $\nu_{\max}$  2924, 1462, 1361, 1251, 1166, 1089 and 835. cm<sup>-1</sup>; <sup>1</sup>H NMR (400 MHz, CDCl<sub>3</sub>, 6.5:1 ratio of isomers, major isomer)  $\delta$  7.66 (2H, d,  $J$  = 8.2 Hz), 7.53 (2H, d,  $J$  = 8.0 Hz), 7.27 (2H, d,  $J$  = 8.8 Hz), 7.09 (2H, d,  $J$  = 8 Hz), 5.9 (1H, d,  $J$  = 1.9



Hz), 5.5 (1H, dt,  $J = 5.0, 15.2$  Hz), 5.33 (1H, dd,  $J = 8.4, 8.4$  Hz), 4.14 (2H, dd,  $J = 1.4, 3.6$  Hz), 3.72-3.66 (1H, m), 3.56-3.49 (1H, m), 2.54 (1H, q,  $J = 8.4$  Hz), 2.43 (3H, s), 2.32 (3H, s), 1.82-1.75 (1H, m), 1.46-1.35 (1H, m), 0.91 (9H, s), 0.07 (6H, s);  $^{13}\text{C}$  NMR (100 MHz,  $\text{CDCl}_3$ , DEPT-135)  $\delta$  143.9 (C), 139.8 (C), 136.6 (C), 134.6 (C), 133.4 (C), 132.5 (CH), 129.5 (2CH), 129.4 (CH), 128.8 (2CH), 128.5 (2CH), 128.0 (2CH), 119.0 (CH), 63.4 ( $\text{CH}_2$ ), 49.2 ( $\text{CH}_2$ ), 46.2 (CH), 28.9 ( $\text{CH}_2$ ), 26.0 ( $3\text{CH}_3$ ), 21.6 ( $\text{CH}_3$ ), 21.4 ( $\text{CH}_3$ ), 18.5 (C), -5.1 ( $2\text{CH}_3$ ); HRMS (ESI)  $m/z$ : 520.2312  $[\text{M} + \text{Na}]^+$ , calcd for  $\text{C}_{28}\text{H}_{39}\text{NO}_3\text{NaSSi}$ ; Found 520.2314.

**(E)-3-(2-((E)-benzylidene)-1-tosylpyrrolidin-3-yl)prop-2-en-1-ol:**

Prepared by following general procedure **A** purified by column chromatography using EtOAc/hexane

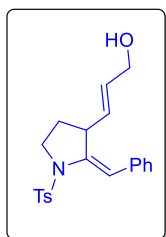

and isolated product in 90% yield as a pale-yellow liquid. IR (neat)  $\nu_{\text{max}}$  3412, 2956, 1597, 1354, 1159, 1087 and 657.  $\text{cm}^{-1}$ ;  $^1\text{H}$  NMR (400 MHz,  $\text{CDCl}_3$ )  $\delta$  7.63 (2H, d,  $J = 8.2$  Hz), 7.60 (2H, d,  $J = 7.4$  Hz), 7.29-7.25 (4H, m), 7.17 (1H, t,  $J = 7.4$  Hz), 5.92 (1H, d,  $J = 1.84$  Hz), 5.58 (1H, dt,  $J = 5.6, 15.3$  Hz), 5.35 (1H, dd,  $J = 8.4, 8.4$  Hz), 4.09 (2H, d,  $J = 5.5$  Hz), 3.69 (1H, dd,  $J = 3.1, 8.5$ ), 3.56-3.49 (1H, m), 2.6 (1H, q,  $J = 8.4$  Hz), 2.42 (3H, s), 1.96-1.77 (2H, m), 1.49-1.39 (1H, m);  $^{13}\text{C}$  NMR (100 MHz,  $\text{CDCl}_3$ , DEPT-135)  $\delta$  144.1 (C), 140.4 (C), 136.3 (C), 134.4 (C), 132.1 (CH), 130.7 (CH), 129.5 (2CH), 128.8 (2CH), 127.9 (2CH), 127.8 (2CH), 126.9 (CH), 118.9 (CH), 63.0 ( $\text{CH}_2$ ), 49.2 ( $\text{CH}_2$ ), 46.2 (CH), 28.8 ( $\text{CH}_2$ ), 21.6 ( $\text{CH}_3$ ); HRMS (ESI)  $m/z$ : 392.1291  $[\text{M} + \text{Na}]^+$ , calcd for  $\text{C}_{21}\text{H}_{23}\text{NO}_3\text{NaS}$ ; Found 392.1290.

**(E)-3-(2-((E)-4-chlorobenzylidene)-1-tosylpyrrolidin-3-yl)prop-2-en-1-ol:**

Prepared by following general procedure **A** purified by column chromatography using EtOAc/hexane

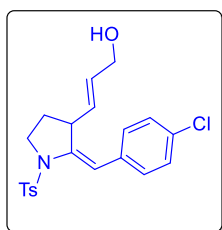

and isolated product in 85% yield as a pale yellow liquid. IR (neat)  $\nu_{\text{max}}$  3422, 2926, 1597, 1352, 1161, 1087 and 813.  $\text{cm}^{-1}$ ;  $^1\text{H}$  NMR (400 MHz,  $\text{CDCl}_3$ )  $\delta$  7.62 (2H, d,  $J = 8.2$  Hz), 7.52 (2H, d,  $J = 8.5$  Hz), 7.27 (2H, d,  $J = 8.2$  Hz), 7.22 (2H, d,  $J = 8.5$  Hz), 5.86 (1H, d,  $J = 1.92$  Hz), 5.6 (1H, dt,  $J = 5.5, 15.3$  Hz), 5.35 (1H, dd,  $J = 8.5, 8.5$  Hz), 4.11 (2H, d,  $J = 5.5$  Hz), 3.74-3.68 (1H, m), 3.57-3.5 (1H, m), 2.61 (1H, q,  $J = 8.3$  Hz), 2.43 (3H, s), 1.86-1.79 (1H, m), 1.69 (1H, br s), 1.50-

1.39 (1H, m);  $^{13}\text{C}$  NMR (100 MHz,  $\text{CDCl}_3$ , DEPT-135)  $\delta$  144.3 (C), 141.2 (C), 134.9 (C), 134.4 (C), 132.3 (CH), 132.3 (C), 130.4 (CH), 130.1 (2CH), 129.6 (2CH), 127.9 (2CH), 127.9 (2CH), 117.5 (CH), 63.0 ( $\text{CH}_2$ ), 49.3 ( $\text{CH}_2$ ), 46.4 (CH), 28.8 ( $\text{CH}_2$ ), 21.6 ( $\text{CH}_3$ ); HRMS (ESI)  $m/z$ : 426.0901  $[\text{M} + \text{Na}]^+$ , calcd for  $\text{C}_{21}\text{H}_{22}\text{NO}_3\text{ClNaS}$ ; Found 426.0907.

**(E)-3-(2-((E)-4-methylbenzylidene)-1-tosylpyrrolidin-3-yl)prop-2-en-1-ol:**

Prepared by following general procedure **A** purified by column chromatography using EtOAc/hexane

and isolated product **c** in 79% yield as a pale-yellow liquid. IR (neat)  $\nu_{\text{max}}$  3398, 2922, 1597, 1352, 1159, 1087 and 812.  $\text{cm}^{-1}$ ;  $^1\text{H}$  NMR (400 MHz,  $\text{CDCl}_3$ )  $\delta$  7.65 (2H, d,  $J = 8.2$  Hz), 7.51 (2H, d,  $J = 8.04$  Hz), 7.27 (2H, d,  $J = 7.6$  Hz), 7.09 (2H, d,  $J = 8$  Hz), 5.89 (1H, d,  $J = 1.52$  Hz), 5.57 (1H, dt,  $J = 5.6, 15.3$  Hz), 5.35 (1H, dd,  $J = 8.5, 8.5$  Hz), 4.10 (2H, d,  $J = 5.22$  Hz), 3.73-3.67 (1H, m), 3.59-3.49 (1H, m), 2.58 (1H, q,  $J = 8.4$  Hz), 2.42 (3H, s), 2.32 (3H, s), 1.98 (1H, br s), 1.83-1.76 (1H, m), 1.48-1.38 (1H, m);  $^{13}\text{C}$



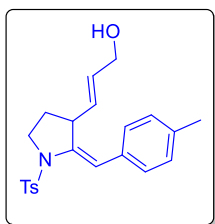

NMR (100 MHz,  $\text{CDCl}_3$ , DEPT-135)  $\delta$  144.0 (C), 139.6 (C), 136.7 (C), 134.5 (C), 133.3 (C), 131.9 (CH), 131.0 (CH), 129.5 (2CH), 128.8 (2CH), 128.5 (2CH), 128.0 (2CH), 119.1 (CH), 63.1 ( $\text{CH}_2$ ), 49.2 ( $\text{CH}_2$ ), 46.2 (CH) 28.9 ( $\text{CH}_2$ ), 21.6 ( $\text{CH}_3$ ) 21.4 ( $\text{CH}_3$ ); HRMS (ESI)  $m/z$ : 406.1447 [ $\text{M} + \text{Na}$ ] $^+$ , calcd for  $\text{C}_{22}\text{H}_{25}\text{NO}_3\text{NaS}$ ; Found 406.1451.

**(E)-3-(2-((E)-benzylidene)-1-tosylpyrrolidin-3-yl)acrylaldehyde (1a):**

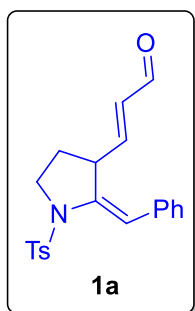

Prepared by following general procedure **A** purified by column chromatography using ether/hexane and isolated product **1a** in 80% yield as a pale-yellow semi solid. IR (neat)  $\nu_{\text{max}}$  2976, 1687, 1595, 1354, 1161, 1087 and 817.  $\text{cm}^{-1}$ ;  $^1\text{H}$  NMR (400 MHz,  $\text{CDCl}_3$ )  $\delta$  9.45 (1H, d,  $J = 7.8$  Hz), 7.65 (2H, d,  $J = 8.24$  Hz), 7.58 (2H, d,  $J = 7.4$  Hz), 7.26-7.20 (4H, m), 7.20 (1H, t,  $J = 7.32$  Hz), 6.39 (1H, dd,  $J = 8.8$ , 8.8 Hz), 6.03 (1H, dd,  $J = 7.8$ , 7.8 Hz), 5.91 (1H, d,  $J = 1.56$  Hz), 3.84-3.78 (1H, m), 3.64 (1H, dt,  $J = 7.9$ , 11.96 Hz), 3.04 (1H, q,  $J = 8.6$  Hz), 2.43 (3H, s), 1.97-1.89 (1H, m), 1.58 (1H, dq,  $J = 8.6$ , 8.6 Hz);  $^{13}\text{C}$  NMR (100 MHz,  $\text{CDCl}_3$ , DEPT-135)  $\delta$  193.3 (C, H-C=O), 155.2 (CH), 144.6 (C), 138.5 (C), 135.7 (C), 134.5 (C), 133.8 (CH), 129.8 (2CH), 129.0 (2CH), 128.1 (2CH), 128.0 (2CH), 127.5 (CH), 120.8 (CH), 49.8 ( $\text{CH}_2$ ), 46.6 (CH) 28.5 ( $\text{CH}_2$ ), 21.7 ( $\text{CH}_3$ ); HRMS (ESI)  $m/z$ : 390.1134 [ $\text{M} + \text{Na}$ ] $^+$ , calcd for  $\text{C}_{21}\text{H}_{22}\text{NO}_3\text{NaS}$ ; Found 390.1135.

**(E)-3-(2-((E)-4-chlorobenzylidene)-1-tosylpyrrolidin-3-yl)acrylaldehyde (1b):**

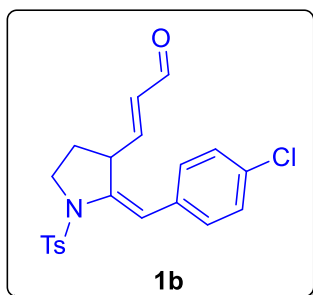

Prepared by following general procedure **A** purified by column chromatography using ether/hexane and isolated product **1b** in 70% yield as a yellow semi solid. IR (neat)  $\nu_{\text{max}}$  2924, 1683, 1597, 1489, 1354, 1161, 1087 and 813.  $\text{cm}^{-1}$ ;  $^1\text{H}$  NMR (400 MHz,  $\text{CDCl}_3$ )  $\delta$  9.46 (1H, d,  $J = 7.8$  Hz), 7.63 (2H, d,  $J = 8.24$  Hz), 7.50 (2H, d,  $J = 8.52$  Hz), 7.29 (2H, d,  $J = 8.1$  Hz), 7.23 (2H, d,  $J = 8.5$  Hz), 6.39 (1H, dd,  $J = 8.8$ , 8.8 Hz), 6.04 (1H, dd,  $J = 7.8$ , 7.8 Hz), 5.85 (1H, d,  $J = 1.68$  Hz), 3.87-3.80 (1H, m), 3.65 (1H, dt,  $J = 7.7$ , 11.96 Hz), 3.05 (1H, q,  $J = 8.6$  Hz), 2.44 (3H, s), 2.0-1.92 (1H, m), 1.6 (1H, dq,  $J = 8.5$ , 8.5 Hz);  $^{13}\text{C}$  NMR (100 MHz,  $\text{CDCl}_3$ , DEPT-135)  $\delta$  193.1 (C, H-C=O), 154.7 (C), 144.7 (C), 139.2 (C), 134.4 (C), 134.1 (C), 133.9 (CH), 130.1 (2CH), 129.8 (2CH), 128.1 (2CH), 127.9 (2CH), 119.3 (CH), 116.5 (CH), 49.8 ( $\text{CH}_2$ ), 46.6 (CH) 28.4 ( $\text{CH}_2$ ), 21.7 ( $\text{CH}_3$ ); HRMS (ESI)  $m/z$ : 424.0745 [ $\text{M} + \text{Na}$ ] $^+$ , calcd for  $\text{C}_{21}\text{H}_{20}\text{NO}_3\text{NaS}$ ; Found 424.0750.

**(E)-3-(2-((E)-4-methylbenzylidene)-1-tosylpyrrolidin-3-yl)acrylaldehyde (1c):**

Prepared by following general procedure **A** purified by column chromatography using ether/hexane and isolated product **1c** in 62% yield as a yellow semi solid. IR (neat)  $\nu_{\text{max}}$  2924, 1674, 1598, 1352, 1161, 1087 and 812.  $\text{cm}^{-1}$ ;  $^1\text{H}$  NMR (400 MHz,  $\text{CDCl}_3$ )  $\delta$  9.45 (1H, d,  $J = 7.8$  Hz), 7.66 (2H, d,  $J = 8.2$  Hz), 7.50 (2H, d,  $J = 8.04$  Hz), 7.28 (2H, d,  $J = 8.2$  Hz), 7.1 (2H, d,  $J = 8$  Hz), 6.38 (1H, dd,  $J = 8.8$ , 8.8 Hz), 6.01 (1H, dd,  $J = 7.8$ , 7.8 Hz), 5.89 (1H, br s), 3.85-3.79 (1H, m), 3.65 (1H, dt,  $J = 7.8$ , 11.96 Hz), 3.01 (1H, q,  $J = 8.6$  Hz), 2.44 (3H, s), 2.33 (3H, s), 1.96-1.84 (1H, m), 1.58-1.52 (1H, m);  $^{13}\text{C}$  NMR (100 MHz,



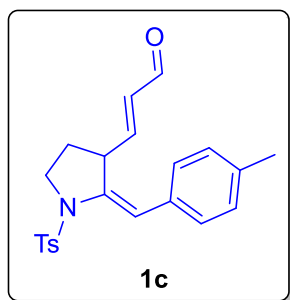

CDCl<sub>3</sub>, DEPT-135)  $\delta$  193.2 (C, H-C=O), 155.3 (CH), 144.4 (C), 137.6 (C), 134.5 (C), 133.7 (CH), 132.6 (C), 129.7 (2CH), 128.8 (2CH), 128.6 (2CH), 128.0 (2CH), 120.9 (CH), 49.7 (CH<sub>2</sub>), 46.4 (CH), 28.4 (CH<sub>2</sub>), 21.6 (CH<sub>3</sub>), 21.4 (CH<sub>3</sub>); HRMS (ESI)  $m/z$ : 404.1291 [M + Na]<sup>+</sup>, calcd for C<sub>22</sub>H<sub>23</sub>NO<sub>3</sub>NaS; Found 404.1294.

**2-((4*R*,5*R*,6*R*,7*R*)-3'-methyl-5'-oxo-1',6,7-triphenyl-1-tosyl-1',2,3,4,5',6,7-octahydrospiro[indole-5,4'-pyrazol]-4-yl)acetaldehyde (4aaa):**

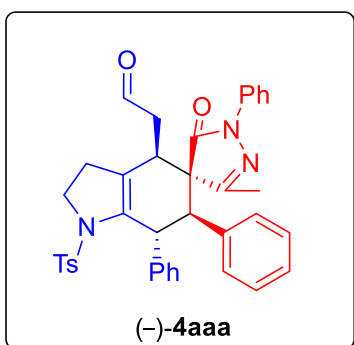

Prepared by following general procedure **C** purified by column chromatography using EtOAc/hexane and isolated product **4aaa** in 85% yield as a yellow solid with M. P. 102-105 °C. The enantiomeric excess (ee) was determined by chiral stationary phase HPLC using a Daicel Chiralpak IC column (hexane/EtOAc = 70:30, flow rate 1 mL/min,  $\lambda$  = 254 nm),  $t_R$  = 7.365 min (major),  $t_R$  = 8.182 min (minor);  $[\alpha]_D^{25}$  = -161.111 (CHCl<sub>3</sub>,  $c$  = 0.72 g/100mL for 96% ee); IR (neat)  $\nu_{\max}$  2922, 1718, 1695, 1595, 1159 and 752. cm<sup>-1</sup>; <sup>1</sup>H NMR (400 MHz, CDCl<sub>3</sub>)  $\delta$  9.62 (1H, s), 8.14 (2H, d,  $J$  = 8.2 Hz), 7.83 (2H, d,  $J$  = 7.7 Hz), 7.44 (2H, d,  $J$  = 8.3 Hz), 7.33 (2H, d,  $J$  = 8.1 Hz), 7.24 (1H, t,  $J$  = 7.4 Hz), 7.08-6.87 (10H, m), 4.84 (1H, d,  $J$  = 10.1 Hz), 3.74-3.58 (3H, m), 3.13 (1H, d,  $J$  = 10.5 Hz), 2.45 (3H, s), 2.38 (1H, dd,  $J$  = 9.2, 9.2 Hz), 2.03 (1H, dd,  $J$  = 3.2, 3.2 Hz), 1.98 (3H, s), 1.90 (1H, dd,  $J$  = 9.3, 9.3 Hz), 1.65-1.63 (1H, m); <sup>13</sup>C NMR (100 MHz, CDCl<sub>3</sub>, DEPT-135)  $\delta$  190.0 (C, H-C=O), 172.4 (C, N-C=O), 160.7 (C, C=N), 143.5 (C), 140.4 (C), 137.6 (C), 136.7 (C), 134.6 (C), 129.3 (2CH), 128.9 (4CH), 128.8 (2CH), 128.4 (2CH), 127.8 (5CH), 126.3 (CH), 125.9 (C), 125.4 (CH), 119.1 (3CH), 61.1 (C), 55.8 (CH), 49.6 (CH<sub>2</sub>), 44.7 (CH), 42.3 (CH<sub>2</sub>), 33.7 (CH), 30.4 (CH<sub>2</sub>), 21.7 (CH<sub>3</sub>), 13.9 (CH<sub>3</sub>); HRMS (ESI)  $m/z$ : 652.2241 [M + Na]<sup>+</sup>, calcd for C<sub>38</sub>H<sub>35</sub>N<sub>3</sub>O<sub>4</sub>SNa; Found 652.2241.

**Ethyl(E)-4-((4*R*,5*R*,6*S*,7*S*)-3'-methyl-5'-oxo-1',6,7-triphenyl-1-tosyl-1',2,3,4,5',6,7-octahydrospiro[indole-5,4'-pyrazol]-4-yl)but-2-enoate (5aaa):**

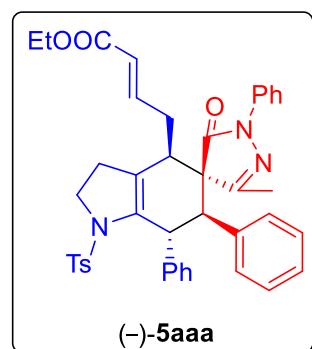

Prepared by following general procedure **D** purified by column chromatography using EtOAc/hexane and isolated product **5aaa** in 85% yield as a yellow solid with M. P. 102 °C. The enantiomeric excess (ee) was determined by chiral stationary phase HPLC using a Daicel Chiralpak IC column (hexane/EtOAc = 70:30, flow rate 1.0 mL/min,  $\lambda$  = 254 nm),  $t_R$  = 7.571 min (major),  $t_R$  = 9.605 min (minor),  $[\alpha]_D^{25}$  = -105.268 (CHCl<sub>3</sub>,  $c$  = 0.12 g/100mL, CHCl<sub>3</sub> for 96% ee); IR (neat)  $\nu_{\max}$  2926, 1699, 1597, 1454, 1157 and 750.31 cm<sup>-1</sup>; <sup>1</sup>H NMR (400 MHz, CDCl<sub>3</sub>)  $\delta$  8.21 (2H, d,  $J$  = 8.4 Hz), 7.79 (2H, d,  $J$  = 8.4 Hz), 7.43-7.37 (4H, m), 7.22 (1H, t,  $J$  = 7.2 Hz), 7.07-6.98 (7H, m), 6.87 (2H, d,  $J$  = 6.8 Hz), 6.72 (1H, quin,  $J$  = 7.2 Hz), 5.62 (1H, d,  $J$  = 15.6 Hz), 4.86 (1H, d,  $J$  = 10 Hz), 4.15-



4.03 (2H, m), 3.71 (1H, dd,  $J = 7.6, 7.2$  Hz), 3.60 (1H, ddd,  $J = 9.2, 9.2, 9.2$  Hz), 3.14 (1H, m), 3.07 (1H, d,  $J = 10.4$  Hz), 2.46 (3H, s), 2.17 (1H, quin,  $J = 7.2$  Hz), 2.05-2.02 (1H, m), 2.00 (3H, s), 1.98-1.92 (1H, m), 1.79-1.67 (2H, m), 1.21 (3H, t,  $J = 6.8$  Hz);  $^{13}\text{C}$  NMR (100 MHz,  $\text{CDCl}_3$ , DEPT-135)  $\delta$  172.1 (C, O-C=O), 165.7 (C, N-C=O), 160.4 (C, C=N), 144.9 (2CH), 143.7 (2C), 140.5 (2C), 140.4 (2C), 137.6 (C), 136.5 (C), 134.3 (C), 129.5 (3CH), 128.8 (4CH), 128.3 (CH), 127.7 (3CH), 127.1 (C), 126.2 (CH), 125.2 (C), 123.9 (C), 119.2 (3CH), 61.4 (C), 60.4 ( $\text{CH}_2$ ), 56.2 (CH), 50.0 ( $\text{CH}_2$ ), 44.5 (CH), 40.0 (CH), 31.9 ( $\text{CH}_2$ ), 30.9 ( $\text{CH}_2$ ), 22.6 ( $\text{CH}_3$ ), 14.1 ( $\text{CH}_3$ ), 14.0 ( $\text{CH}_3$ ); HRMS (ESI)  $m/z$ : 722.2659  $[\text{M} + \text{Na}]^+$ , calcd for  $\text{C}_{42}\text{H}_{41}\text{N}_3\text{O}_5\text{SNa}$ ; Found 722.2683.

**Ethyl(*E*)-4-((4*R*,5*R*,6*S*,7*S*)-6-(3-fluorophenyl)-3'-methyl-5'-oxo-1',7-diphenyl-1-tosyl-1,1',2,3,4,5',6,7-octahydrospiro[indole-5,4'-pyrazol]-4-yl)but-2-enoate (5a**ab**):**

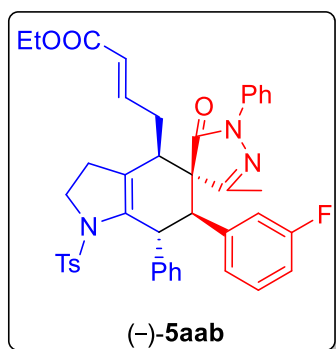

Prepared by following general procedure **D** purified by column chromatography using EtOAc/hexane and isolated product **5a**ab**** in 66% yield as a yellow solid with M. P. 120-123 °C. The enantiomeric excess (ee) was determined by chiral stationary phase HPLC using a Daicel Chiralpak IC column (hexane/EtOAc = 70:30, flow rate 0.5 mL/min,  $\lambda = 254$  nm),  $t_R = 13.949$  min (major),  $t_R = 17.717$  min (minor),  $[\alpha]_D^{25} = -167.583$  ( $\text{CHCl}_3$ ,  $c = 0.12$  g/100mL for 97% ee); IR (neat)  $\nu_{\text{max}}$  2924, 1699, 1595, 1490, 1452, 1348 and 1159  $\text{cm}^{-1}$ ;  $^1\text{H}$  NMR (400 MHz,  $\text{CDCl}_3$ )  $\delta$  8.20 (2H, d,  $J = 8.2$  Hz), 7.79 (2H, d,  $J = 7.5$  Hz), 7.44-7.37 (4H, m), 7.22 (1H, t,  $J = 7.4$  Hz), 7.11-7.04 (3H, m), 6.98 (1H, q,  $J = 6.6$  Hz), 6.88 (2H, d,  $J = 6.2$  Hz), 6.78-6.64 (3H, m), 5.62 (1H, d,  $J = 15.48$  Hz), 4.83 (1H, d,  $J = 10.4$  Hz), 4.15-4.03 (2H, m), 3.73-3.54 (2H, m), 3.14 (1H, br s), 3.07 (1H, d,  $J = 10.5$  Hz), 2.46 (3H, s), 2.16 (1H, quin  $J = 7.1$  Hz), 2.05-2.02 (1H, m), 2.0 (3H, s), 1.98-1.90 (1H, m), 1.78-1.68 (2H, m), 1.20 (3H, t,  $J = 7.1$  Hz);  $^{13}\text{C}$  NMR (100 MHz,  $\text{CDCl}_3$ , DEPT-135)  $\delta$  171.9 (C, O-C=O), 165.6 (C, N-C=O), 160.2 (C, C=N), 144.6 (2CH), 143.7 (C), 140.2 (C), 140.1 (C), 137.5 (C), 134.3 (C), 129.8 (C), 129.5 (3CH), 128.8 (3CH, d,  $J = 8$  Hz), 127.9 (3CH), 127.3 (2CH), 126.5 (2CH), 125.4 (2CH), 124.0 (2CH), 119.2 (3CH), 114.8 (CH, d,  $J = 21$  Hz), 61.2 (C), 60.4 ( $\text{CH}_2$ ), 55.8 (CH), 50.0 ( $\text{CH}_2$ ), 44.5 (CH), 39.9 (CH), 31.9 ( $\text{CH}_2$ ), 30.9 ( $\text{CH}_2$ ), 21.6 ( $\text{CH}_3$ ), 14.2 ( $\text{CH}_3$ ), 14.0 ( $\text{CH}_3$ ); HRMS (ESI)  $m/z$ : 740.2565  $[\text{M} + \text{Na}]^+$ , calcd for  $\text{C}_{42}\text{H}_{40}\text{FN}_3\text{O}_5\text{SNa}$ ; Found 740.2558.

**Ethyl(*E*)-4-((4*R*,5*R*,6*S*,7*S*)-6-(4-fluorophenyl)-3'-methyl-5'-oxo-1',7-diphenyl-1-tosyl-1,1',2,3,4,5',6,7-octahydrospiro[indole-5,4'-pyrazol]-4-yl)but-2-enoate (5a**c**):**

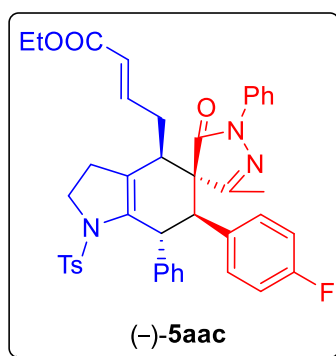

Prepared by following general procedure **D** purified by column chromatography using EtOAc/hexane and isolated product **5a**c**** in 68% yield as a pale-yellow solid with M. P. 89-91 °C. The enantiomeric excess (ee) was determined by chiral stationary phase HPLC using a Daicel Chiralpak IC column (hexane/EtOAc = 70:30, flow rate 0.5 mL/min,  $\lambda = 254$  nm),  $t_R = 14.529$  min (major),  $t_R = 19.923$  min (minor),  $[\alpha]_D^{25} = -108.333$  ( $\text{CHCl}_3$ ,  $c = 0.3$  g/100mL for 96% ee); IR (neat)  $\nu_{\text{max}}$  2924, 1716, 1597, 1496, 1365, 1157  $\text{cm}^{-1}$ ;  $^1\text{H}$  NMR (400 MHz,  $\text{CDCl}_3$ )  $\delta$  8.19 (2H, d,  $J = 8.2$  Hz), 7.80 (2H, d,  $J = 7.6$  Hz), 7.43 (2H, t,  $J = 8.5$  Hz), 7.38 (2H, d,  $J = 8.0$  Hz),



7.23 (1H, t,  $J = 7.4$  Hz), 7.10-7.04 (3H, m), 6.86 (3H, d,  $J = 6.1$  Hz), 6.73-6.65 (3H, m), 5.62 (1H, d,  $J = 15.5$  Hz), 4.81-4.79 (1H, m), 4.15-4.04 (2H, m), 3.74-3.55 (2H, m), 3.14 (1H, br s), 3.07 (1H, d,  $J = 10.6$  Hz), 2.46 (3H, s), 2.18 (1H, quin,  $J = 7.4$  Hz), 2.05-2.02 (1H, m), 1.99 (3H, s), 1.96-1.92 (1H, m), 1.81-1.71 (2H, m), 1.20 (3H, t,  $J = 7.1$  Hz);  $^{13}\text{C}$  NMR (100 MHz,  $\text{CDCl}_3$ , DEPT-135)  $\delta$  172.0 (C, O-C=O), 165.6 (C, N-C=O), 162.1 (C, d,  $J = 245$  Hz), 160.2 (C, C=N), 144.6 (2CH), 143.7 (C), 140.3 (C), 140.2 (C), 137.5 (C), 134.3 (C), 129.5 (3CH), 128.8 (4CH, d,  $J = 11$  Hz), 127.9 (3CH), 127.1 (C), 126.4 (2CH), 125.4 (2CH), 124.0 (2CH), 119.0 (3CH), 115.2 (CH, d,  $J = 21$  Hz), 61.4 (C), 60.4 ( $\text{CH}_2$ ), 55.4 (CH), 50.0 ( $\text{CH}_2$ ), 44.7 (CH), 39.9 (CH), 31.9 ( $\text{CH}_2$ ), 30.9 ( $\text{CH}_2$ ), 21.6 ( $\text{CH}_3$ ), 14.2 ( $\text{CH}_3$ ), 14.0 ( $\text{CH}_3$ ); HRMS (ESI)  $m/z$ : 740.25649  $[\text{M} + \text{Na}]^+$ , calcd for  $\text{C}_{42}\text{H}_{40}\text{FN}_3\text{O}_5\text{SNa}$ ; Found 740.25653.

**Ethyl(*E*)-4-((4*R*,5*R*,6*R*,7*S*)-6-(2-chlorophenyl)-3'-methyl-5'-oxo-1',7-diphenyl-1-tosyl-1,1',2,3,4,5',6,7-octahydrospiro[indole-5,4'-pyrazol]-4-yl)but-2-enoate (5aad):**

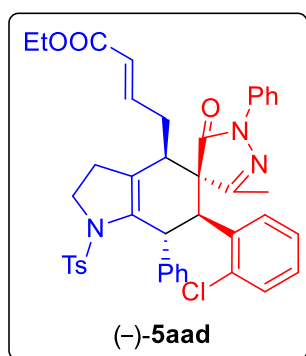

Prepared by following general procedure **D** purified by column chromatography using EtOAc/hexane and isolated product **5aad** in 83% yield as a Off white solid with M. P. 124-127 °C. The enantiomeric excess (ee) was determined by chiral stationary phase HPLC using a Daicel Chiralpak IC column (hexane/EtOAc = 70:30, flow rate 0.5 mL/min,  $\lambda = 254$  nm),  $t_R = 15.433$  min (major),  $t_R = 20.350$  min (minor),  $[\alpha]_D^{25} = -154.872$  ( $\text{CHCl}_3$ ,  $c = 0.39$  g/100mL for 97% ee); IR (neat)  $\nu_{\text{max}}$  2922, 1697, 1595, 1500, 1154 and 754  $\text{cm}^{-1}$ ;  $^1\text{H}$  NMR (400 MHz,  $\text{CDCl}_3$ )  $\delta$  8.19 (2H, d,  $J = 8.2$  Hz), 7.84 (2H, d,  $J = 7.6$  Hz), 7.49-7.36 (5H, m), 7.25-7.21 (1H, m), 7.01-6.98 (6H, m), 6.86 (1H, br s), 6.71 (1H, quin,  $J = 6.5$  Hz), 5.63 (1H, d,  $J = 15.5$  Hz), 4.79-4.77 (1H, m), 4.14-4.06 (2H, m), 4.03 (1H, d,  $J = 10.6$  Hz), 3.75-3.70 (1H, m), 3.68-3.59 (1H, m), 3.20 (1H, br s), 2.46 (3H, s), 2.22-2.14 (1H, m), 2.10 (3H, s), 2.07-1.96 (3H, m), 1.84-1.75 (1H, m), 1.21 (3H, t,  $J = 7.1$  Hz);  $^{13}\text{C}$  NMR (100 MHz,  $\text{CDCl}_3$ , DEPT-135)  $\delta$  172.2 (C, O-C=O), 165.6 (C, N-C=O), 160.8 (C, C=N), 144.8 (CH), 143.7 (C), 140.4 (C), 138.8 (C), 137.6 (C), 134.8 (C), 134.5 (C), 134.1 (C), 129.5 (3CH), 128.9 (CH), 128.8, 128.8 (3CH), 128.7 (3CH), 128.3 (CH), 127.6 (CH), 127.1 (C), 127.1 (CH), 126.4 (CH), 125.3 (CH), 124.0 (CH), 119.0 (3CH), 61.2 (C), 60.4 ( $\text{CH}_2$ ), 50.0 ( $\text{CH}_2$ ), 49.3 (CH), 45.2 (CH), 40.4 (CH), 31.7 ( $\text{CH}_2$ ), 31.0 ( $\text{CH}_2$ ), 21.6 ( $\text{CH}_3$ ), 14.2 ( $\text{CH}_3$ ), 14.0 ( $\text{CH}_3$ ); HRMS (ESI)  $m/z$ : 756.2269  $[\text{M} + \text{Na}]^+$ , calcd for  $\text{C}_{42}\text{H}_{40}\text{ClN}_3\text{O}_5\text{SNa}$ ; Found 756.2271.

**Ethyl(*E*)-4-((4*R*,5*R*,6*S*,7*S*)-6-(3-chlorophenyl)-3'-methyl-5'-oxo-1',7-diphenyl-1-tosyl-1,1',2,3,4,5',6,7-octahydrospiro[indole-5,4'-pyrazol]-4-yl)but-2-enoate (5aae):**

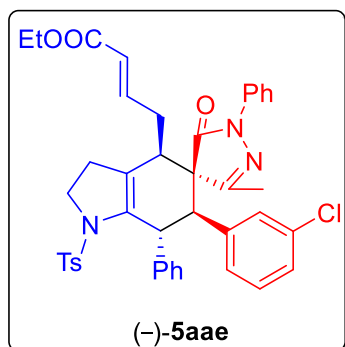

Prepared by following general procedure **D** purified by column chromatography using EtOAc/hexane and isolated product **5aae** in 73% yield as a pale-yellow solid with M. P. 131-135 °C. The enantiomeric excess (ee) was determined by chiral stationary phase HPLC using a Daicel Chiralpak IC column (hexane/EtOAc = 70:30, flow rate 0.5 mL/min,  $\lambda = 254$  nm),  $t_R = 17.441$  min (major),  $t_R = 22.359$  min (minor),  $[\alpha]_D^{25} = -162.000$  ( $\text{CHCl}_3$ ,  $c = 0.45$  g/100mL for 96% ee);



IR (neat)  $\nu_{\max}$  2924, 1699, 1654, 1597, 1492, 1159, 750  $\text{cm}^{-1}$ ;  $^1\text{H}$  NMR (400 MHz,  $\text{CDCl}_3$ )  $\delta$  8.19 (2H, d,  $J = 8.2$  Hz), 7.80 (2H, d,  $J = 7.6$  Hz), 7.45-7.41 (2H, m), 7.39-7.37 (2H, m), 7.23 (1H, t,  $J = 7.5$  Hz), 7.09-7.06 (3H, m), 6.99-6.97 (2H, m), 6.87-6.86 (3H, m), 6.68 (1H, quin,  $J = 7.1$  Hz), 5.61 (1H, d,  $J = 15.5$  Hz), 4.80 (1H, d,  $J = 8.5$  Hz), 4.13-4.05 (2H, m), 3.72-3.67 (1H, m), 3.62-3.54 (1H, m), 3.13 (1H, br s), 3.06 (1H, d,  $J = 10.5$  Hz), 2.46 (3H, s), 2.20-2.12 (1H, m), 2.04-2.00 (1H, m), 1.98 (3H, s), 1.96-1.91 (2H, m), 1.79-1.75 (1H, m), 1.20 (3H, t,  $J = 7.1$  Hz);  $^{13}\text{C}$  NMR (100 MHz,  $\text{CDCl}_3$ , DEPT-135)  $\delta$  171.9 (C, O-C=O), 165.6 (C, N-C=O), 160.1 (C, C=N), 144.6 (CH), 143.7 (C), 140.2 (C), 140.1 (C), 137.5 (C), 135.2 (C), 134.2 (C), 133.5 (C), 129.5 (3CH), 128.9 (3CH), 128.7 (3CH), 128.5 (CH), 127.9 (3CH), 127.2 (C), 126.4 (CH), 125.4 (CH), 124.0 (CH), 119.0 (3CH), 61.2 (C), 60.4 ( $\text{CH}_2$ ), 55.5 (CH), 50.0 ( $\text{CH}_2$ ), 44.5 (CH), 39.9 (CH), 31.8 ( $\text{CH}_2$ ), 30.9 ( $\text{CH}_2$ ), 21.6 ( $\text{CH}_3$ ), 14.1 ( $\text{CH}_3$ ), 14.0 ( $\text{CH}_3$ ); HRMS (ESI)  $m/z$ : 756.2269  $[\text{M} + \text{Na}]^+$ , calcd for  $\text{C}_{42}\text{H}_{40}\text{ClN}_3\text{O}_5\text{SNa}$ ; Found 756.2266.

**Ethyl(*E*)-4-((4*R*,5*R*,6*S*,7*S*)-6-(4-chlorophenyl)-3'-methyl-5'-oxo-1',7-diphenyl-1-tosyl-1,1',2,3,4,5',6,7-octahydrospiro[indole-5,4'-pyrazol]-4-yl)but-2-enoate (**5aaf**):**

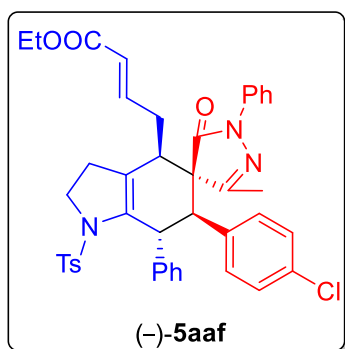

Prepared by following general procedure **D** purified by column chromatography using EtOAc/hexane and isolated product **5aaf** in 85% yield as a Off white solid with M. P. 125-127 °C. The enantiomeric excess (ee) was determined by chiral stationary phase HPLC using a Daicel Chiralpak IC column (hexane/EtOAc = 70:30, flow rate 0.5 mL/min,  $\lambda = 254$  nm),  $t_R = 13.219$  min (major),  $t_R = 17.364$  min (minor),  $[\alpha]_D^{25} = -136.923$  ( $\text{CHCl}_3$ ,  $c = 1.82$  g/100mL for 96% ee); IR (neat)  $\nu_{\max}$  2924, 1701, 1654, 1597, 1492, 1157 and 750  $\text{cm}^{-1}$ ;  $^1\text{H}$  NMR (400 MHz,

$\text{CDCl}_3$ )  $\delta$  8.19 (2H, d,  $J = 8.2$  Hz), 7.80 (2H, d,  $J = 7.6$  Hz), 7.45-7.37 (4H, m), 7.25-7.21 (1H, m), 7.1-7.03 (3H, m), 6.99-6.97 (2H, m), 6.87-6.86 (3H, m), 6.71-6.63 (1H, m), 5.61 (1H, d,  $J = 15.4$  Hz), 4.81-4.78 (1H, m), 4.14-4.03 (2H, m), 3.72-3.53 (2H, m), 3.14 (1H, br s), 3.07 (1H, d,  $J = 10.5$  Hz), 2.46 (3H, s), 2.19-2.12 (1H, m), 2.03-1.99 (1H, m), 1.97 (3H, s), 1.95-1.9 (1H, m), 1.74-1.65 (2H, m), 1.19 (3H, t,  $J = 7$  Hz);  $^{13}\text{C}$  NMR (100 MHz,  $\text{CDCl}_3$ , DEPT-135)  $\delta$  171.9 (C, O-C=O), 165.6 (C, N-C=O), 160.2 (C, C=N), 144.6 (CH), 143.8 (C), 140.2 (C), 140.1 (C), 137.5 (C), 135.2, (C) 134.3 (C), 133.5 (C), 129.5 (2CH), 128.9 (3CH), 128.9 (CH), 128.8 (3CH), 128.5 (CH), 127.9 (2CH), 127.3 (C), 126.4 (CH), 125.4 (CH), 124.0 (CH), 119.0 (3CH), 61.2 (C), 60.4 ( $\text{CH}_2$ ), 55.5 (CH), 50.0 ( $\text{CH}_2$ ), 44.6 (CH), 39.9 (CH), 31.9 ( $\text{CH}_2$ ), 30.9 ( $\text{CH}_2$ ), 21.9 ( $\text{CH}_2$ ), 21.6 ( $\text{CH}_3$ ), 14.2 ( $\text{CH}_3$ ), 14.0 ( $\text{CH}_3$ ); HRMS (ESI)  $m/z$ : 756.2269  $[\text{M} + \text{Na}]^+$ , calcd for  $\text{C}_{42}\text{H}_{40}\text{ClN}_3\text{O}_5\text{SNa}$ ; Found 756.2277.



**Ethyl(*E*)-4-((4*R*,5*R*,6*R*,7*S*)-6-(2-bromophenyl)-3'-methyl-5'-oxo-1',7-diphenyl-1-tosyl-1,1',2,3,4,5',6,7-octahydrospiro[indole-5,4'-pyrazol]-4-yl)but-2-enoate (**5aag**):**

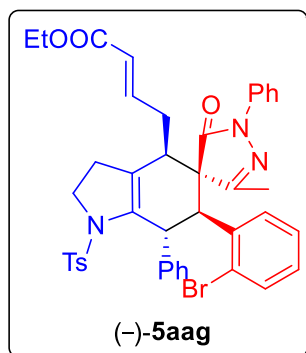

Prepared by following general procedure **D** purified by column chromatography using EtOAc/hexane and isolated product **5aag** in 74% yield as a pale-yellow solid with M. P. 133-135 °C. The enantiomeric excess (ee) was determined by chiral stationary phase HPLC using a Daicel Chiralpak IC column (hexane/EtOAc = 70:30, flow rate 0.5 mL/min,  $\lambda$  = 254 nm),  $t_R$  = 13.219 min (major),  $t_R$  = 17.364 min (minor),  $[\alpha]_D^{25}$  = -121.347 (CHCl<sub>3</sub>, c = 1.93 g/100mL for 96% ee); IR (neat)  $\nu_{\max}$  2939, 1716, 1691, 1597, 1498, 1159 and 750 cm<sup>-1</sup>; <sup>1</sup>H NMR (400 MHz, CDCl<sub>3</sub>)  $\delta$  8.19

(2H, d,  $J$  = 8.2 Hz), 7.84 (2H, d,  $J$  = 7.6 Hz), 7.48-7.41 (3H, m), 7.37 (2H, d,  $J$  = 8.1 Hz), 7.25-7.21 (2H, m), 7.08-7.02 (4H, m), 6.98-6.89 (2H, m), 6.71 (1H, quin,  $J$  = 6.9 Hz), 5.62 (1H, d,  $J$  = 15.5 Hz), 4.79-4.76 (1H, m), 4.15-4.03 (2H, m), 3.99 (1H, d,  $J$  = 10.5 Hz), 3.75-3.60 (2H, m), 3.24 (1H, br s), 2.45 (3H, s), 2.21-2.15 (1H, m), 2.14 (3H, s), 2.04-1.97 (2H, m), 1.85-1.79 (1H, m), 1.68 (1H, br s), 1.2 (3H, t,  $J$  = 7.1 Hz); <sup>13</sup>C NMR (100 MHz, CDCl<sub>3</sub>, DEPT-135)  $\delta$  172.2 (C, O-C=O), 165.6 (C, N-C=O), 160.9 (C, C=N), 144.8 (CH), 143.7 (C), 140.3 (C), 138.6 (C), 137.6 (C), 136.5 (C), 134.5 (C), 133.0 (CH), 129.5 (3CH), 129.2 (CH), 128.9 (3CH), 128.7 (3CH), 128.5 (CH), 127.7 (CH), 127.6 (C), 127.1 (C), 126.5 (CH), 125.3 (CH), 124.0 (CH), 119.0 (3CH), 61.3 (C), 60.4 (CH<sub>2</sub>), 52.0 (CH), 50.0 (CH<sub>2</sub>), 45.5 (CH), 40.4 (CH), 31.7 (CH<sub>2</sub>), 31.0 (CH<sub>2</sub>), 21.7 (CH<sub>3</sub>), 14.5 (CH<sub>3</sub>), 14.2 (CH<sub>3</sub>); HRMS (ESI)  $m/z$ : 800.1764 [M + Na]<sup>+</sup>, calcd for C<sub>42</sub>H<sub>40</sub>BrN<sub>3</sub>O<sub>5</sub>SNa; Found 800.1768.

**Ethyl(*E*)-4-((4*R*,5*R*,6*S*,7*S*)-6-(3-bromophenyl)-3'-methyl-5'-oxo-1',7-diphenyl-1-tosyl-1,1',2,3,4,5',6,7-octahydrospiro[indole-5,4'-pyrazol]-4-yl)but-2-enoate (**5aah**):**

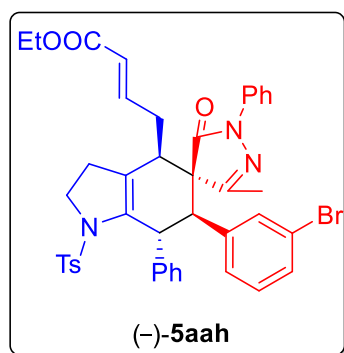

Prepared by following general procedure **D** purified by column chromatography using EtOAc/hexane and isolated product **5aah** in 67% yield as a white solid with M. P. 158-162 °C. The enantiomeric excess (ee) was determined by chiral stationary phase HPLC using a Daicel Chiralpak IC column (hexane/EtOAc = 70:30, flow rate 0.5 mL/min,  $\lambda$  = 254 nm),  $t_R$  = 17.2019 min (major),  $t_R$  = 22.355 min (minor),  $[\alpha]_D^{25}$  = -126.098 (CHCl<sub>3</sub>, c = 0.82 g/100mL for 95% ee); IR (neat)  $\nu_{\max}$  2918, 1720 (C=O), 1693, 1597, 1498 and 682 cm<sup>-1</sup>; <sup>1</sup>H NMR (400 MHz,

CDCl<sub>3</sub>)  $\delta$  8.19 (2H, d,  $J$  = 8.1 Hz), 7.80 (2H, d,  $J$  = 8 Hz), 7.45-7.36 (4H, m), 7.25-7.17 (2H, m), 7.11-7.08 (3H, m), 6.89-6.87 (4H, m), 6.68 (1H, quin,  $J$  = 7.4 Hz), 5.62 (1H, d,  $J$  = 15.5 Hz), 4.81 (1H, d,  $J$  = 10.3 Hz), 4.15-4.04 (2H, m), 3.73-3.68 (1H, m), 3.63-3.55 (1H, m), 3.13 (1H, br s), 3.03 (1H, d,  $J$  = 10.5 Hz), 2.45 (3H, s), 2.17 (1H, quin,  $J$  = 7.3 Hz), 2.04-2.02 (1H, m), 1.99 (3H, s), 1.97-1.91 (1H, m), 1.83-1.61 (2H, m), 1.20 (3H, t,  $J$  = 7 Hz); <sup>13</sup>C NMR (100 MHz, CDCl<sub>3</sub>, DEPT-135)  $\delta$  171.8 (C, O-C=O), 165.6 (C, N-C=O), 160.1 (C, C=N), 144.6 (2CH), 143.7 (C), 140.2 (2C), 140.0 (C), 138.9 (C), 137.4 (C), 134.3 (C), 130.9 (CH), 129.8 (CH), 129.5 (3CH), 128.9 (3CH), 128.8 (3CH), 127.9 (2CH), 127.3 (C), 126.5 (CH), 125.5 (CH), 124.1 (2CH), 119.3 (CH), 61.2 (C), 60.4 (CH<sub>2</sub>), 55.8 (CH), 50.0 (CH<sub>2</sub>), 44.4 (CH),



39.8 (CH), 31.9 (CH<sub>2</sub>), 30.9 (CH<sub>2</sub>), 21.6 (CH<sub>3</sub>), 14.2 (CH<sub>3</sub>), 14.0 (CH<sub>3</sub>); HRMS (ESI) *m/z*: 800.1764 [M + Na]<sup>+</sup>, calcd for C<sub>42</sub>H<sub>40</sub>BrN<sub>3</sub>O<sub>5</sub>SNa; Found 800.1768.

**Ethyl(*E*)-4-((4*R*,5*R*,6*S*,7*S*)-6-(4-bromophenyl)-3'-methyl-5'-oxo-1',7-diphenyl-1-tosyl-1,1',2,3,4,5',6,7-octahydrospiro[indole-5,4'-pyrazol]-4-yl)but-2-enoate (**5aai**):**

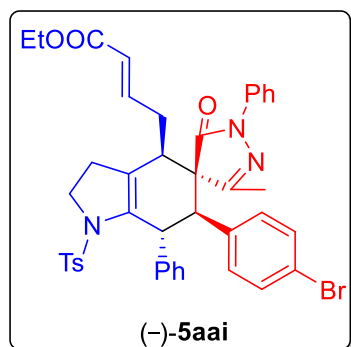

Prepared by following general procedure **D** purified by column chromatography using EtOAc/hexane and isolated product **5aai** in 82% yield as a white solid with M. P. 155-158 °C. The enantiomeric excess (ee) was determined by chiral stationary phase HPLC using a Daicel Chiralpak IC column (hexane/EtOAc = 70:30, flow rate 0.5 mL/min, λ = 254 nm), *t<sub>R</sub>* = 13.276 min (major), *t<sub>R</sub>* = 17.445 min (minor), [α]<sub>D</sub><sup>25</sup> = -166.800 (CHCl<sub>3</sub>, *c* = 0.25 g/100mL for 96% ee); IR (neat) *ν*<sub>max</sub> 2922, 1699, 1653, 1597, 1490, 1159 and 648 cm<sup>-1</sup>; <sup>1</sup>H NMR (400 MHz, CDCl<sub>3</sub>)

δ 8.19 (2H, md, *J* = 8.4Hz), 7.80 (2H, d, *J* = 7.6 Hz), 7.44 (2H, t, *J* = 7.2 Hz), 7.38 (2H, d, *J* = 8 Hz), 7.24 (1H, t, *J* = 7.2 Hz), 7.14-7.06 (5H, m), 6.87 (3H, d, *J* = 6Hz), 6.68 (1H, quin, *J* = 6.8 Hz), 5.61 (1H, d, *J* = 15.6 Hz), 4.80 (1H, d, *J* = 10.8 Hz), 4.15-4.03 (2H, m), 3.73-3.54 (2H, m), 3.14 (1H, br s), 3.05 (1H, d, *J* = 10.4 Hz), 2.46 (3H, s), 2.16 (1H, quin, *J* = 8 Hz), 2.04-2.00 (1H, m), 1.98 (3H, s), 1.97-1.91 (1H, m), 1.79-1.69 (1H, br m), 1.64 (1H, br s), 1.20 (3H, t, *J* = 7.2 Hz); <sup>13</sup>C NMR (100 MHz, CDCl<sub>3</sub>, DEPT-135) δ 171.9 (C, O-C=O), 165.6 (C, N-C=O), 160.1 (C, C=N), 144.6 (2CH), 143.7 (C), 140.3 (C), 140.1 (C), 137.5 (C), 135.8 (C), 134.3 (C), 131.4 (CH), 129.5 (3CH), 128.9 (3CH), 128.8 (3CH), 127.9 (2CH), 127.2 (C), 126.4 (CH), 125.4 (CH), 124.1 (CH), 121.7 (C), 119.1 (3CH), 61.2 (C), 60.4 (CH<sub>2</sub>), 55.6 (CH), 50.0 (CH<sub>2</sub>), 44.5 (CH), 40.0 (CH), 31.9 (CH<sub>2</sub>), 30.9 (CH<sub>2</sub>), 21.7 (CH<sub>3</sub>), 14.2 (CH<sub>3</sub>), 14.0 (CH<sub>3</sub>); HRMS (ESI) *m/z*: 800.1764 [M + Na]<sup>+</sup>, calcd for C<sub>42</sub>H<sub>40</sub>BrN<sub>3</sub>O<sub>5</sub>SNa; Found 800.1766.

**Ethyl(*E*)-4-((4*R*,5*R*,6*S*,7*S*)-3'-methyl-5'-oxo-1',7-diphenyl-6-(*p*-tolyl)-1-tosyl-1,1',2,3,4,5',6,7-octahydrospiro[indole-5,4'-pyrazol]-4-yl)but-2-enoate (**5aaj**):**

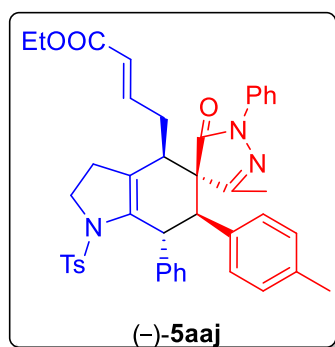

Prepared by following general procedure **D** purified by column chromatography using EtOAc/hexane and isolated product **5aaj** in 80% yield as a pale-yellow solid with M. P. 205-208 °C. The enantiomeric excess (ee) was determined by chiral stationary phase HPLC using a Daicel Chiralpak IC column (hexane/EtOAc = 70:30, flow rate 0.5 mL/min, λ = 254 nm), *t<sub>R</sub>* = 16.070 min (major), *t<sub>R</sub>* = 21.051 min (minor), [α]<sub>D</sub><sup>25</sup> = -170.000 (CHCl<sub>3</sub>, *c* = 0.14g/100mL for 97% ee); IR (neat) *ν*<sub>max</sub>

2918, 1718, 1697, 1597, 1454, 1157 and 760 cm<sup>-1</sup>; <sup>1</sup>H NMR (400 MHz, CDCl<sub>3</sub>) δ 8.21 (2H, d, *J* = 8.2Hz), 7.81 (2H, d, *J* = 7.6Hz), 7.44-7.40 (2H, m), 7.38-7.36 (2H, m), 7.24-7.20 (1H, m), 7.09-7.04 (3H, m), 6.88-6.78 (5H, m), 6.69 (1H, quin, *J* = 7 Hz), 5.61 (1H, d, *J* = 15.4 Hz), 4.82-4.8 (1H, m), 4.13-4.05 (2H, m), 3.72-3.54 (2H, m), 3.12 (1H, br s), 3.03 (1H, d, *J* = 10.52 Hz), 2.45 (3H, s), 2.2-2.15 (1H, m), 2.14 (3H, s), 1.99 (3H, s), 1.97-1.90 (2H, m), 1.78-1.69 (2H, m), 1.21 (3H, t, *J* = 7.1Hz); <sup>13</sup>C NMR (100 MHz, CDCl<sub>3</sub>, DEPT-135) δ 172.1 (C, O-C=O), 165.7 (C, N-C=O), 160.5 (C, C=N), 144.9 (2CH), 143.6 (C), 140.6 (C), 137.7 (C), 137.2 (C), 134.4 (C), 133.3 (C), 132.2 (C), 132.1 (C), 129.4 (3CH), 129.0 (CH),



128.8 (5CH), 127.7 (2CH), 126.1 (CH), 125.2 (2CH), 123.9 (CH), 119.2 (3CH), 61.5 (C), 60.4 (CH<sub>2</sub>), 55.8 (CH), 50.0 (CH<sub>2</sub>), 44.6 (CH), 40.0 (CH), 31.9 (CH<sub>2</sub>), 31.0 (CH<sub>2</sub>), 21.7 (CH<sub>3</sub>), 21.0 (CH<sub>3</sub>), 14.2 (CH<sub>3</sub>), 14.0 (CH<sub>3</sub>); HRMS (ESI) *m/z*: 736.2816 [M + Na]<sup>+</sup>, calcd for C<sub>43</sub>H<sub>43</sub>N<sub>3</sub>O<sub>5</sub>SNa; Found 736.2842.

**Ethyl(*E*)-4-((4*R*,5*R*,6*S*,7*S*)-6-(3-methoxyphenyl)-3'-methyl-5'-oxo-1',7-diphenyl-1-tosyl-1,1',2,3,4,5',6,7-octahydrospiro[indole-5,4'-pyrazol]-4-yl)but-2-enoate (**5aak**):**

Prepared by following general procedure **D** purified by column chromatography using EtOAc/hexane

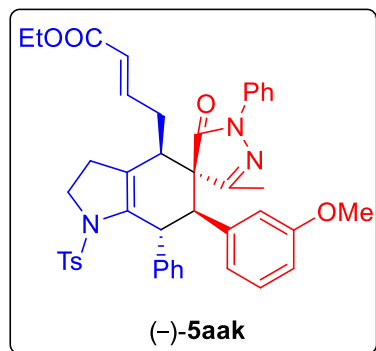

and isolated product **5aak** in 66% yield as a off white solid with M. P.

113-115 °C. The enantiomeric excess (ee) was determined by chiral stationary phase HPLC using a Daicel Chiralpak IC column (hexane/EtOAc = 70:30, flow rate 0.5 mL/min, λ = 254 nm), *t<sub>R</sub>* = 14.328 min (major), *t<sub>R</sub>* = 20.170 min (minor), [α]<sub>D</sub><sup>25</sup> = **-117.931** (CHCl<sub>3</sub>, c = 1.74 g/100mL for 96% ee); IR (neat) ν<sub>max</sub> 2976, 1697,

1595, 1490, 1292, 1157 cm<sup>-1</sup>; <sup>1</sup>H NMR (400 MHz, CDCl<sub>3</sub>) δ 8.21 (2H, d, *J* = 8.2 Hz), 7.83 (2H, d, *J* = 7.6 Hz), 7.43-7.37 (4H, m), 7.21 (1H, t, *J* = 7.4 Hz), 7.09-7.02 (3H, m), 6.88 (3H, d, *J* = 6 Hz), 6.69 (1H, quin, *J* = 7 Hz), 6.6-6.57 (1H, m), 6.44 (1H, br s), 5.61 (1H, d, *J* = 15.5 Hz), 4.85-4.82 (1H, m), 4.13-4.04 (2H, m), 3.72-3.54 (2H, m), 3.42 (3H, s), 3.13 (1H, br s), 3.05 (1H, d, *J* = 10.5 Hz), 2.46 (3H, s), 2.2-2.12 (1H, m), 2.04-2.0 (1H, m), 1.99 (3H, s), 1.94-1.90 (1H, m), 1.83-1.66 (2H, m), 1.20 (3H, t, *J* = 7.1 Hz); <sup>13</sup>C NMR (100 MHz, CDCl<sub>3</sub>, DEPT-135) δ 172.1 (C, O-C=O), 165.7 (C, N-C=O), 160.5 (C, C=N), 144.9 (2CH), 143.6 (C), 140.6 (C), 140.5 (C), 137.7 (C), 137.2 (C), 134.4 (C), 133.3 (C), 132.2 (C), 132.1 (C), 129.4 (3C), 128.8 (CH), 128.8 (4CH) 127.8 (3CH), 126.1 (CH), 125.2 (CH), 123.9 (CH), 119.2 (3CH), 61.5 (C), 60.4 (CH<sub>2</sub>), 56.2 (CH), 55.0 (CH<sub>3</sub>) 50.0 (CH<sub>2</sub>), 44.5 (CH), 40.1 (CH), 31.9 (CH<sub>2</sub>), 30.9 (CH<sub>2</sub>), 21.7 (CH<sub>3</sub>), 14.2 (CH<sub>3</sub>), 14.0 (CH<sub>3</sub>); HRMS (ESI) *m/z*: 752.2765 [M + Na]<sup>+</sup>, calcd for C<sub>43</sub>H<sub>43</sub>N<sub>3</sub>O<sub>6</sub>SNa; Found 752.2766.

**Ethyl(*E*)-4-((4*R*,5*R*,6*S*,7*S*)-6-(4-methoxyphenyl)-3'-methyl-5'-oxo-1',7-diphenyl-1-tosyl-1,1',2,3,4,5',6,7-octahydrospiro[indole-5,4'-pyrazol]-4-yl)but-2-enoate (**5aal**):**

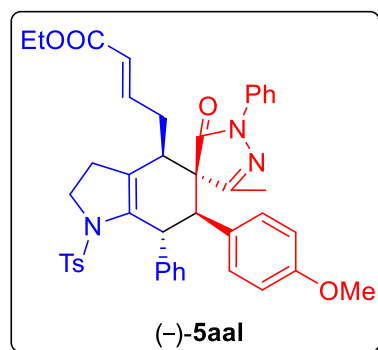

Prepared by following general procedure **D** purified by column chromatography using EtOAc/hexane and isolated product **5aal** in

84% yield as a off white solid with M. P. 113-115 °C. The enantiomeric excess (ee) was determined by chiral stationary phase HPLC using a Daicel Chiralpak IC column (hexane/EtOAc = 70:30, flow rate 0.5 mL/min, λ = 254 nm), *t<sub>R</sub>* = 15.990 min (major), *t<sub>R</sub>* = 22.096 min (minor), [α]<sub>D</sub><sup>25</sup> = **-123.662** (CHCl<sub>3</sub>, c = 1.42 g/100mL for 96% ee); IR (neat) ν<sub>max</sub> 2918, 1699, 1597, 1512,

1492, 1159 and 754 cm<sup>-1</sup>; <sup>1</sup>H NMR (400 MHz, CDCl<sub>3</sub>) δ 8.20 (2H, d, *J* = 8.2 Hz), 7.81 (2H, d, *J* = 7.6 Hz), 7.44-7.36 (5H, m), 7.24-7.20 (1H, m), 7.08-7.05 (3H, m), 6.88-6.86 (2H, m), 6.7 (1H, quin, *J* = 7 Hz), 6.53-6.51 (2H, m), 5.62 (1H, d, *J* = 15.4 Hz), 4.81-4.79 (1H, m), 4.13-4.05 (2H, m), 3.73-3.68 (2H, m), 3.64 (3H, s), 3.61-3.57 (1H, m), 3.12 (1H, br s), 3.02 (1H, d, *J* = 10.5 Hz), 2.46 (3H, s), 2.41-2.36 (1H, m), 2.20-2.12 (2H, m), 1.99 (3H, s), 1.96-1.91 (1H, m), 1.21 (3H, t, *J* = 7.1 Hz); <sup>13</sup>C NMR (100 MHz,



CDCl<sub>3</sub>, DEPT-135)  $\delta$  172.2 (C, O-C=O), 165.7 (C, N-C=O), 160.5 (C, C=N), 158.8 (C), 144.9 (2CH), 143.6 (C), 140.6 (C), 140.5 (C), 137.7 (C), 134.4 (C), 129.4 (3CH), 128.8 (CH), 128.8 (4CH), 128.5 (C), 128.4 (C), 127.7 (3CH), 126.2 (CH), 125.2 (CH), 123.9 (CH), 119.1 (3CH), 113.6 (CH), 61.5 (C), 60.4 (CH<sub>2</sub>), 55.4 (CH), 55.0 (CH<sub>3</sub>), 50.0 (CH<sub>2</sub>), 44.7 (CH), 40.0 (CH), 31.9 (CH<sub>2</sub>), 31.0 (CH<sub>2</sub>), 21.6 (CH<sub>3</sub>), 14.2 (CH<sub>3</sub>), 14.0 (CH<sub>3</sub>); HRMS (ESI)  $m/z$ : 752.2765 [M + Na]<sup>+</sup>, calcd for C<sub>43</sub>H<sub>43</sub>N<sub>3</sub>O<sub>6</sub>SNa; Found 752.2762.

**Ethyl(*E*)-4-((4*R*,5*R*,6*S*,7*S*)-6-(4-(benzyloxy)phenyl)-3'-methyl-5'-oxo-1',7-diphenyl-1-tosyl-1,1',2,3,4,5',6,7-octahydrospiro[indole-5,4'-pyrazol]-4-yl)but-2-enoate (5aam):**

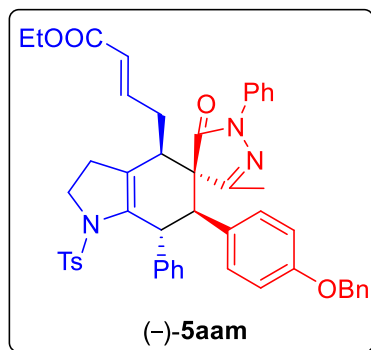

Prepared by following general procedure **D** purified by column chromatography using EtOAc/hexane and isolated product **5aam** in 73% yield as a pale-yellow solid with M. P. 112-114 °C. The enantiomeric excess (ee) was determined by chiral stationary phase HPLC using a Daicel Chiralpak IC column (hexane/EtOAc = 70:30, flow rate 0.5 mL/min,  $\lambda$  = 254 nm),  $t_R$  = 14.691 min (major),  $t_R$  = 19.857 min (minor),  $[\alpha]_D^{25}$  = -129.793 (CHCl<sub>3</sub>,  $c$  = 1.45 g/100mL for 94% ee); IR (neat)  $\nu_{\max}$  2920, 1697, 1595, 1510, 1454, 1290 and

754 cm<sup>-1</sup>; <sup>1</sup>H NMR (400 MHz, CDCl<sub>3</sub>)  $\delta$  8.2 (2H, d,  $J$  = 8.2 Hz), 7.8 (2H, d,  $J$  = 7.5 Hz), 7.43-7.36 (4H, m), 7.34-7.31 (4H, m), 7.3-7.27 (1H, m), 7.21 (1H, t,  $J$  = 7.4 Hz), 7.1-7.05 (3H, m), 6.88-6.86 (3H, m), 6.69 (1H, quin,  $J$  = 7 Hz), 6.61-6.59 (2H, m), 5.61 (1H, d,  $J$  = 15.5 Hz), 4.89-4.79 (3H, m), 4.15-4.03 (2H, m), 3.72-3.54 (2H, m), 3.13 (1H, br s), 3.03 (1H, d,  $J$  = 10.5 Hz), 2.45 (3H, s), 2.2-2.12 (1H, m), 2.05-2.0 (1H, m), 1.99 (3H, s), 1.94-1.90 (1H, m), 1.79-1.66 (2H, m), 1.2 (3H, t,  $J$  = 7.1 Hz); <sup>13</sup>C NMR (100 MHz, CDCl<sub>3</sub>, DEPT-135)  $\delta$  172.2 (C, O-C=O), 165.7 (C, N-C=O), 160.5 (C, C=N), 158.1 (C), 144.9 (CH), 143.6 (C), 140.6 (C), 140.5 (2C), 137.7 (C), 136.7 (C), 134.4 (C), 129.5 (2CH), 128.8 (3CH), 128.8 (3CH), 128.5 (3CH), 128.0 (CH), 127.8 (2CH), 127.6 (3CH), 127.1 (C), 126.2 (CH), 125.2 (CH), 123.9 (CH), 119.2 (3CH), 114.5 (CH), 69.8 (CH<sub>2</sub>), 61.5 (C), 60.4 (CH<sub>2</sub>), 55.4 (CH), 50.0 (CH<sub>2</sub>), 44.8 (CH), 40.0 (CH), 32.0 (CH<sub>2</sub>), 30.9 (CH<sub>2</sub>), 21.6 (CH<sub>3</sub>), 14.2 (CH<sub>3</sub>), 14.0 (CH<sub>3</sub>); HRMS (ESI)  $m/z$ : 828.3078 [M + Na]<sup>+</sup>, calcd for C<sub>49</sub>H<sub>47</sub>N<sub>3</sub>O<sub>6</sub>SNa; Found 828.3077.

**Ethyl(*E*)-4-((4*R*,5*R*,6*S*,7*S*)-6-(3-hydroxyphenyl)-3'-methyl-5'-oxo-1',7-diphenyl-1-tosyl-1,1',2,3,4,5',6,7-octahydrospiro[indole-5,4'-pyrazol]-4-yl)but-2-enoate (5aan):**

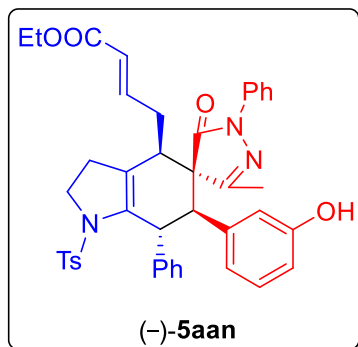

Prepared by following general procedure **D** purified by column chromatography using EtOAc/hexane and isolated product **5aan** in 41% yield as a pale-yellow solid with M. P. 120-122 °C. The enantiomeric excess (ee) was determined by chiral stationary phase HPLC using a Daicel Chiralpak IC column (hexane/EtOAc = 70:30, flow rate 0.5 mL/min,  $\lambda$  = 254 nm),  $t_R$  = 13.444 min (major),  $t_R$  = 16.238 min (minor),  $[\alpha]_D^{25}$  = -103.314 (CHCl<sub>3</sub>,  $c$  = 0.5 g/100mL for 93% ee); IR (neat)  $\nu_{\max}$  3404, 2924, 1697, 1597, 1456 and 1157 cm<sup>-1</sup>; <sup>1</sup>H NMR

(400 MHz, CDCl<sub>3</sub>)  $\delta$  8.18 (2H, d,  $J$  = 8.2 Hz), 7.78 (d, 2H,  $J$  = 7.7 Hz), 7.44-7.36 (m, 4H), 7.24-7.20 (m,



1H), 7.1-7.03 (m, 4H), 6.93-6.84 (m, 3H), 6.7 (1H, quin,  $J = 7.1$  Hz), 6.54-6.52 (1H, m), 6.41 (1H, broad), 5.63 (1H, d,  $J = 15.5$  Hz), 4.82-4.8 (1H, m), 4.14-4.06 (2H, m), 3.73-3.54 (2H, m), 3.13 (1H, broad), 3.02 (1H, d,  $J = 10.5$  Hz), 2.46 (3H, s), 2.21-2.13 (1H, m), 2.04-2.03 (1H, m), 2.0 (3H, s), 1.94-1.92 (1H, m), 1.82-1.76 (2H, m), 1.21 (3H, t,  $J = 7$  Hz);  $^{13}\text{C}$  NMR (100 MHz,  $\text{CDCl}_3$ , DEPT-135)  $\delta$  172.2 (C, C-C=O), 165.8 (C, N-C=O), 160.5 (C, C=N), 144.9 (CH), 143.7 (C), 140.4 (C), 140.3 (C), 138.1 (C), 137.6 (C), 134.4 (C), 132.1 (CH), 132.0 (CH), 129.5 (3CH), 129.4 (C), 128.8 (3CH), 128.7 (2CH), 128.7 (CH), 128.5 (CH), 127.8 (2CH), 127.1 (C), 126.3 (CH), 125.4 (CH), 123.9 (CH), 119.4 (CH), 114.8 (CH), 61.4, (C) 60.5 ( $\text{CH}_2$ ), 55.9 (CH), 50.0 ( $\text{CH}_2$ ), 44.5 (CH), 39.9 (CH), 31.9 ( $\text{CH}_2$ ), 30.9 ( $\text{CH}_2$ ), 21.6 ( $\text{CH}_3$ ), 14.2 ( $\text{CH}_3$ ), 14.0 ( $\text{CH}_3$ ); HRMS (ESI)  $m/z$ : 738.2608  $[\text{M} + \text{Na}]^+$ , calcd for  $\text{C}_{42}\text{H}_{41}\text{N}_3\text{O}_6\text{SNa}$ ; Found 738.2609.

**Ethyl(*E*)-4-((4*R*,5*R*,6*S*,7*S*)-6-(4-hydroxyphenyl)-3'-methyl-5'-oxo-1',7-diphenyl-1-tosyl-1,1',2,3,4,5',6,7-octahydrospiro[indole-5,4'-pyrazol]-4-yl)but-2-enoate (5aao):**

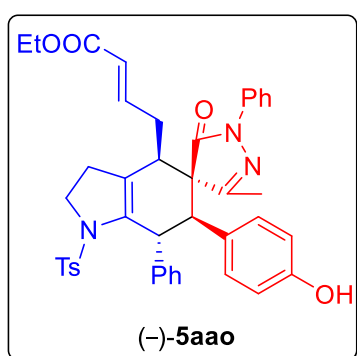

Prepared by following general procedure **D** purified by column chromatography using EtOAc/hexane and isolated product **5aao** in 53% yield as a pale-yellow solid with M. P. 96-98 °C. The enantiomeric excess (ee) was determined by chiral stationary phase HPLC using a Daicel Chiralpak IC column (hexane/EtOAc = 70:30, flow rate 0.5 mL/min,  $\lambda = 254$  nm),  $t_R = 15.820$  min (major),  $t_R = 22.353$  min (minor),  $[\alpha]_D^{25} = -83.898$  ( $\text{CHCl}_3$ ,  $c = 0.12$  g/100mL for 74% ee); IR (neat)  $\nu_{\text{max}}$  3456, 2922, 1699, 1597, 1438, 1516 and 758.02  $\text{cm}^{-1}$ ;  $^1\text{H}$  NMR

(400 MHz,  $\text{CDCl}_3$ )  $\delta$  8.19 (2H, d,  $J = 8.2$  Hz), 7.81 (2H, d,  $J = 7.6$  Hz), 7.44-7.36 (4H, m), 7.24-7.19 (1H, m), 7.1-7.05 (3H, m), 6.88-6.86 (3H, m), 6.73-6.65 (2H, m), 6.47-6.45 (2H, m), 5.61 (1H, d,  $J = 15.5$  Hz), 4.8-4.77 (1H, m), 4.13-4.05 (2H, m), 3.73-3.55 (2H, m), 3.12 (1H, br s), 3.01 (1H, d,  $J = 10.5$  Hz), 2.46 (3H, s), 2.2-2.12 (1H, m), 2.04-2.01 (1H, m), 1.99 (3H, s), 1.95-1.91 (1H, m), 1.83-1.74 (2H, m), 1.21 (3H, t,  $J = 7.1$  Hz);  $^{13}\text{C}$  NMR (100 MHz,  $\text{CDCl}_3$ , DEPT-135)  $\delta$  172.2 (C, O-C=O), 165.7 (C, N-C=O), 160.5 (C, C=N), 155.23 (C), 144.9 (CH), 143.6 (C), 137.7 (C), 134.4 (C), 132.2 (2CH), 132.1 (3CH), 129.4 (2CH), 128.8 (2CH), 128.8 (2CH), 128.6 (2CH), 128.5 (2CH), 127.7 (2CH), 127.0 (C), 126.2 (CH), 125.2 (CH), 123.9 (CH), 119.1 (2CH), 61.6 (C), 60.4 ( $\text{CH}_2$ ), 55.4 (CH), 50.0 ( $\text{CH}_2$ ), 44.7 (CH), 40.0 (CH), 31.9 ( $\text{CH}_2$ ), 29.8.9 ( $\text{CH}_2$ ), 21.6 ( $\text{CH}_3$ ), 14.2 ( $\text{CH}_3$ ), 14.0 ( $\text{CH}_3$ ); HRMS (ESI)  $m/z$ : 738.2608  $[\text{M} + \text{Na}]^+$ , calcd for  $\text{C}_{42}\text{H}_{41}\text{N}_3\text{O}_6\text{SNa}$ ; Found 738.2609.

**Ethyl(*E*)-4-((4*R*,5*R*,6*S*,7*S*)-3'-methyl-6-(4-nitrophenyl)-5'-oxo-1',7-diphenyl-1-tosyl-1,1',2,3,4,5',6,7-octahydrospiro[indole-5,4'-pyrazol]-4-yl)but-2-enoate (5aap):**

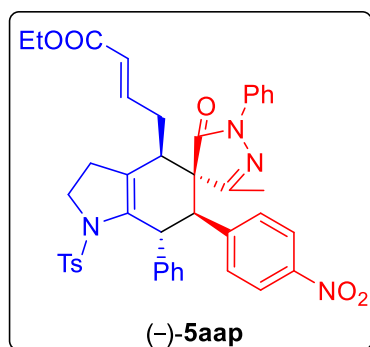

Prepared by following general procedure **D** purified by column chromatography using EtOAc/hexane and isolated product **5aap** in 62% yield as a pale-yellow solid with M. P. 85-87 °C. The enantiomeric excess (ee) was determined by chiral stationary phase HPLC using a Daicel Chiralpak IC column (hexane/EtOAc = 70:30, flow rate 0.5 mL/min,  $\lambda = 254$  nm),  $t_R = 21.012$  min (major),  $t_R = 28.984$  min (minor),  $[\alpha]_D^{25} = -126.998$  ( $\text{CHCl}_3$ ,  $c = 0.46$  g/100mL for



**94% ee**); IR (neat)  $\nu_{\max}$  2920, 1701, 1697, 1519, 1597, 1346, 1519, 1157 and 756  $\text{cm}^{-1}$ ;  $^1\text{H}$  NMR (400 MHz,  $\text{CDCl}_3$ )  $\delta$  8.19 (2H, d,  $J = 8.1$  Hz), 7.87 (2H, d,  $J = 8.4$  Hz), 7.79 (2H, d,  $J = 8.2$  Hz), 7.45-7.38 (4H, m), 7.24-7.22 (1H, m), 7.07-7.06 (4H, m), 6.86 (2H, broad), 6.66 (1H, quin,  $J = 7.5$  Hz), 5.61 (1H, d,  $J = 15.4$  Hz), 4.88-4.85 (1H, m), 4.14-4.02 (2H, m), 3.73-3.54 (2H, m), 3.25 (1H, d,  $J = 10.5$  Hz), 3.18 (1H, br s), 2.46 (3H, s), 2.22-2.14 (1H, m), 2.05-2.02 (1H, m), 1.98 (3H, s), 1.96-1.92 (1H, m), 1.78-1.73 (2H, m), 1.19 (3H, t,  $J = 7.1$  Hz);  $^{13}\text{C}$  NMR (100 MHz,  $\text{CDCl}_3$ , DEPT-135)  $\delta$  171.6 (C, O-C=O), 165.5 (C, N-C=O), 159.8 (C, C=N), 147.3 (C), 144.5 (C), 144.2 (CH), 143.9 (C), 139.9 (C), 139.6 (C), 137.3 (C), 134.2 (C), 129.6 (3CH), 129.0 (3CH), 128.7 (3CH), 128.1 (2CH), 127.5 (C), 126.7 (CH), 125.6 (CH), 124.3 (CH), 123.5 (2CH), 118.9 (3CH), 61.1 (C), 60.4 ( $\text{CH}_2$ ), 55.9 (CH), 50.1 ( $\text{CH}_2$ ), 44.4 (CH), 39.9 (CH), 31.8 ( $\text{CH}_2$ ), 30.9 ( $\text{CH}_2$ ), 21.6 ( $\text{CH}_3$ ), 14.2 ( $\text{CH}_3$ ), 14.0 ( $\text{CH}_3$ ); HRMS (ESI)  $m/z$ : 767.2510  $[\text{M} + \text{Na}]^+$ , calcd for  $\text{C}_{42}\text{H}_{40}\text{N}_4\text{O}_7\text{SNa}$ ; Found 767.2509.

**Ethyl(*E*)-4-((4*R*,5*R*,6*S*,7*S*)-6-(3-cyanophenyl)-3'-methyl-5'-oxo-1',7-diphenyl-1-tosyl-1,1',2,3,4,5',6,7-octahydrospiro[indole-5,4'-pyrazol]-4-yl)but-2-enoate (**5aaq**):**

Prepared by following general procedure **D** purified by column chromatography using EtOAc/hexane

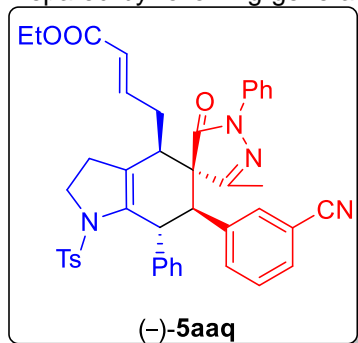

and isolated product **5aaq** in 52% yield as a yellow solid with M. P. 112-114  $^{\circ}\text{C}$ . The enantiomeric excess (ee) was determined by chiral stationary phase HPLC using a Daicel Chiralpak IC column (hexane/EtOAc = 70:30, flow rate 0.5 mL/min,  $\lambda = 254$  nm),  $t_R = 17.161$  min (major),  $t_R = 22.747$  min (minor);  $[\alpha]_{\text{D}}^{25} = -114.545$  ( $\text{CHCl}_3$ ,  $c = 0.11$  g/100mL for 96% ee); IR (neat)  $\nu_{\max}$  2922, 1699, 1597, 1494, 1159 and 752.  $\text{cm}^{-1}$ ;  $^1\text{H}$  NMR (400 MHz,  $\text{CDCl}_3$ )  $\delta$  8.18 (2H, d,  $J = 8.4$  Hz), 7.77 (2H, d,  $J = 7.6$  Hz), 7.46-7.36 (6H, m), 7.24 (1H, t,  $J = 7.4$  Hz), 7.16 (1H, t,  $J = 7.2$  Hz), 7.09-7.08 (3H, m), 6.86-6.84 (2H, br m), 6.67 (1H, quin,  $J = 7.3$  Hz), 5.62 (1H, d,  $J = 15.2$  Hz), 4.82 (1H, d,  $J = 10.4$  Hz), 4.15-4.03 (2H, m), 3.74 (1H, dd,  $J = 4.4, 7.2$  Hz), 3.60 (1H, ddd,  $J = 9.2, 9.6, 9.6$  Hz), 3.16 (1H, br s), 3.12 (1H, d,  $J = 10.4$  Hz), 2.46 (3H, s), 2.19 (1H, quin,  $J = 8.1$  Hz), 2.05-2.03 (1H, m), 2.01 (3H, s), 1.96-1.92 (1H, m), 1.79-1.70 (2H, m), 1.20 (3H, t,  $J = 14.4$  Hz);  $^{13}\text{C}$  NMR (100 MHz,  $\text{CDCl}_3$ , DEPT-135)  $\delta$  171.6 (C, O-C=O), 165.5 (C, N-C=O), 159.8 (C, C=N), 144.2 (2CH), 143.8 (C), 140.0 (C), 139.6 (C), 138.4 (C), 137.2 (C), 134.2 (C), 131.6 (CH), 129.5 (3CH), 129.3 (CH), 129.0 (3CH), 128.8 (3CH), 128.1 (2CH), 127.3 (C), 126.8 (CH), 125.7 (CH), 124.3 (2CH), 119.0 (2CH), 118.2 (C, -CN), 61.1 (C), 60.5 ( $\text{CH}_2$ ), 55.8 (CH), 50.0 ( $\text{CH}_2$ ), 44.3 (CH), 39.8 (CH), 31.9 ( $\text{CH}_2$ ), 30.9 ( $\text{CH}_2$ ), 21.7 ( $\text{CH}_3$ ), 14.2 ( $\text{CH}_3$ ), 14.0 ( $\text{CH}_3$ ); HRMS (ESI)  $m/z$ : 747.2612  $[\text{M} + \text{Na}]^+$ , calcd for  $\text{C}_{43}\text{H}_{40}\text{N}_4\text{O}_5\text{SNa}$ ; Found 722.2611.



**Ethyl(*E*)-4-((4*R*,5*R*,6*S*,7*S*)-6-(4-cyanophenyl)-3'-methyl-5'-oxo-1',7-diphenyl-1-tosyl-1,1',2,3,4,5',6,7-octahydrospiro[indole-5,4'-pyrazol]-4-yl)but-2-enoate (**5aar**):**

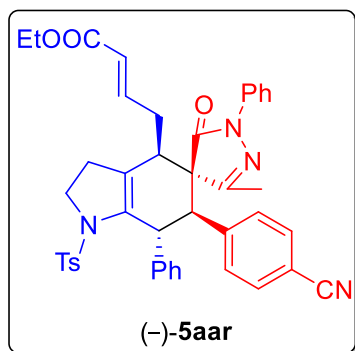

Prepared by following general procedure **D** purified by column chromatography using EtOAc/hexane and isolated product **5aar** in 73% yield as a white solid with M. P. 108-110 °C. The enantiomeric excess (ee) was determined by chiral stationary phase HPLC using a Daicel Chiralpak IC column (hexane/EtOAc = 70:30, flow rate 0.5 mL/min,  $\lambda$  = 254 nm),  $t_R$  = 18.317 min (major),  $t_R$  = 25.259 min (minor),  $[\alpha]_D^{25}$  = **-108.676 (CHCl<sub>3</sub>, c = 1.12 g/100mL for 96% ee)**; IR (neat)  $\nu_{\max}$  2924, 2235, 1718, 1697, 1597, 1496, 1155 and 750. cm<sup>-1</sup>; <sup>1</sup>H

NMR (400 MHz, CDCl<sub>3</sub>)  $\delta$  8.18 (2H, d,  $J$  = 8.2 Hz), 7.78 (2H, d,  $J$  = 7.6 Hz), 7.45-7.38 (4H, m), 7.3 (2H, d,  $J$  = 8.1 Hz), 7.25 (1H, t, 7.2 Hz), 7.08-7.017 (4H, m), 6.85 (2H, br m), 6.67 (1H, quin,  $J$  = 7.3 Hz), 5.61 (1H, d,  $J$  = 15.4 Hz), 4.84 (1H, d,  $J$  = 10.4 Hz), 4.14-4.02 (2H, m), 3.71 (1H, dd,  $J$  = 7.6, 7.6 Hz), 3.59 (1H, ddd,  $J$  = 9.6, 9.6, 9.6 Hz), 3.16 (2H, br m), 2.46 (3H, s), 2.18 (1H, quin,  $J$  = 7.6 Hz), 2.05-2.01 (1H, m), 1.99 (3H, s), 1.96-1.92 (1H, m), 1.82-1.7 (2H, m), 1.19 (3H, t,  $J$  = 7.1 Hz); <sup>13</sup>C NMR (100 MHz, CDCl<sub>3</sub>, DEPT-135)  $\delta$  171.6 (C, O-C=O), 165.5 (C, N-C=O), 159.8 (C, C=N), 144.2 (2CH), 143.9 (C), 142.3 (C), 140.0 (C), 139.7 (C), 137.3 (C), 134.2 (C), 132.1 (2CH), 129.5 (2CH), 129.0 (3CH), 128.7 (2CH), 128.1 (2CH), 127.3 (C), 126.7 (CH), 125.6 (CH), 124.2 (2CH), 118.9 (3CH), 118.3 (CN), 111.8 (C), 61.1 (C), 60.4 (CH<sub>2</sub>), 56.2 (CH), 50.0 (CH<sub>2</sub>), 44.3 (CH), 39.9 (CH), 31.8 (CH<sub>2</sub>), 30.9 (CH<sub>2</sub>), 21.6 (CH<sub>3</sub>), 14.2 (CH<sub>3</sub>), 14.0 (CH<sub>3</sub>); HRMS (ESI)  $m/z$ : 747.2612 [M + Na]<sup>+</sup>, calcd for C<sub>43</sub>H<sub>40</sub>N<sub>4</sub>O<sub>5</sub>Na; Found 722.2612.

**Ethyl(*E*)-4-((4*R*,5*R*,6*S*,7*S*)-3'-methyl-6-(naphthalen-1-yl)-5'-oxo-1',7-diphenyl-1-tosyl-1,1',2,3,4,5',6,7-octahydrospiro[indole-5,4'-pyrazol]-4-yl)but-2-enoate (**5aas**):**

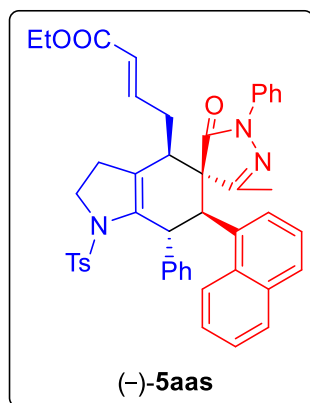

Prepared by following general procedure **D** purified by column chromatography using EtOAc/hexane and isolated product **5aas** in 61% yield as a pale-yellow solid with M. P. 131-133 °C. The enantiomeric excess (ee) was determined by chiral stationary phase HPLC using a Daicel Chiralpak IC column (hexane/EtOAc = 70:30, flow rate 0.5 mL/min,  $\lambda$  = 254 nm),  $t_R$  = 16.293 min (major),  $t_R$  = 24.184 min (minor),  $[\alpha]_D^{25}$  = **-208.333 (CHCl<sub>3</sub>, c = 0.18 g/100mL for 96% ee)**; IR (neat)  $\nu_{\max}$  2922, 1699, 1597, 1492, 1454, 1157 and 750. cm<sup>-1</sup>; <sup>1</sup>H NMR (400 MHz, CDCl<sub>3</sub>)  $\delta$  8.24 (2H, d,  $J$  = 8.4 Hz), 7.83 (2H, d,  $J$  = 8 Hz), 7.64 (3H, ddd,  $J$  = 7.6,

8, 8 Hz), 7.46-7.39 (5H, m), 7.25-7.13 (4H, m), 6.94-6.80 (4H, m), 6.73 (1H, quin,  $J$  = 6.9 Hz), 5.64 (1H, d,  $J$  = 15.6 Hz), 4.99 (1H, d,  $J$  = 10.4 Hz), 4.19 (1H, d,  $J$  = 10 Hz), 4.14-4.06 (2H, m), 3.76 (1H, dd,  $J$  = 7.2, 8.7 Hz), 3.68 (1H, ddd,  $J$  = 9.2, 9.4, 9.2 Hz), 3.27 (1H, br s), 2.48 (3H, s), 2.21 (1H, quin,  $J$  = 7.2 Hz), 2.06-1.99 (2H, m), 1.91-1.81 (1H, m), 1.71 (3H, s), 1.67-1.64 (1H, m), 1.21 (3H, t,  $J$  = 7.2 Hz); <sup>13</sup>C NMR (100 MHz, CDCl<sub>3</sub>, DEPT-135)  $\delta$  172.6 (C, O-C=O), 165.7 (C, N-C=O), 160.4 (C, C=N), 145.0 (2CH), 143.7 (C), 140.8 (C), 139.8 (C), 137.7 (C), 134.5 (C), 133.4 (C), 133.4 (C), 131.5 (C), 129.5



(2CH), 128.9 (3CH), 128.8 (3CH), 128.3 (CH), 127.6 (CH), 127.0 (C), 126.2 (CH), 125.5 (CH), 125.3 (CH), 125.1 (CH), 125.0 (CH), 124.4 (CH), 123.9 (CH), 121.8 (CH), 119.1 (3CH), 61.7 (C), 60.4 (CH<sub>2</sub>), 50.0 (CH<sub>2</sub>), 47.8 (CH), 45.9 (CH), 40.8 (CH), 31.8 (CH<sub>2</sub>), 31.1 (CH<sub>2</sub>), 21.7 (CH<sub>3</sub>), 14.2 (CH<sub>3</sub>), 14.0 (CH<sub>3</sub>); HRMS (ESI) *m/z*: 772.2816 [M + Na]<sup>+</sup>, calcd for C<sub>46</sub>H<sub>43</sub>N<sub>3</sub>O<sub>5</sub>SNa; Found 772.2811.

**Ethyl(*E*)-4-((4*R*,5*S*,6*R*,7*S*)-3'-methyl-5'-oxo-1',7-diphenyl-6-((*E*)-styryl)-1-tosyl-1,1',2,3,4,5',6,7-octahydrospiro[indole-5,4'-pyrazol]-4-yl)but-2-enoate (**5aat**):**

Prepared by following general procedure **D** purified by column chromatography using EtOAc/hexane and isolated product **5aat** in 68% yield as a brown solid with M. P. 95-97 °C. The enantiomeric excess (*ee*) was determined by chiral stationary phase HPLC using a Daicel Chiralpak IA column (hexane/EtOAc =

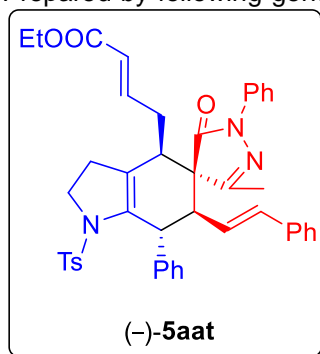

= 75:25, flow rate 0.5 mL/min,  $\lambda$  = 254 nm),  $t_R$  = 18.952 min (major),  $t_R$  = 22.332 min (minor),  $[\alpha]_D^{25}$  = -73.600 (CHCl<sub>3</sub>, *c* = 0.25 g/100mL for 90% *ee*); IR (neat)  $\nu_{\max}$  2924, 1701, 1597, 1496, 1288, 1157 and 748. cm<sup>-1</sup>; <sup>1</sup>H NMR (400 MHz, CDCl<sub>3</sub>)  $\delta$  8.15 (2H, d, *J* = 8.2 Hz), 7.94 (2H, d, *J* = 7.6 Hz), 7.45 (2H, t, *J* = 7.44 Hz), 7.36 (2H, d, *J* = 7.9 Hz), 7.24-7.20 (3H,

*m*), 7.17-7.10 (5H, *m*), 6.99-6.96 (2H, *m*), 6.68 (1H, quin, *J* = 7.1 Hz), 5.78 (1H, d, *J* = 15.7 Hz), 5.69 (1H, dd, *J* = 9.5, 9.5 Hz), 5.61 (1H, d, *J* = 15.5 Hz), 4.52 (1H, d, *J* = 9.8 Hz), 4.15-4.03 (2H, *m*), 3.70 (1H, dd, *J* = 7.2, 8.4 Hz), 3.58 (1H, ddd, *J* = 9.3, 9.4, 9.3 Hz), 3.08 (1H, br s), 2.66 (1H, t, *J* = 9.6 Hz), 2.45 (3H, s), 2.15 (1H, quin, *J* = 7.1 Hz), 2.05 (3H, s), 2.02-1.98 (1H, *m*), 1.95-1.89 (1H, *m*), 1.76-1.67 (2H, *m*), 1.21 (3H, t, *J* = 7.1 Hz); <sup>13</sup>C NMR (100 MHz, CDCl<sub>3</sub>, DEPT-135)  $\delta$  171.8 (C, O-C=O), 165.6 (C, N-C=O), 160.8 (C, C=N), 144.7 (2CH), 143.6 (C), 140.7 (C), 139.9 (C), 137.6 (C), 136.2 (C), 135.1 (CH), 134.3 (C), 129.4 (2CH), 128.9 (2CH), 128.7 (2CH), 128.4 (3CH), 127.9 (2CH), 127.7 (CH), 127.1 (C), 126.5 (CH), 126.3 (2CH), 125.2 (CH), 124.2 (CH), 124.0 (CH), 119.0 (2CH), 60.7 (C), 60.4 (CH<sub>2</sub>), 53.0 (CH), 50.0 (CH<sub>2</sub>), 43.6 (CH), 39.0 (CH), 31.9 (CH<sub>2</sub>), 30.9 (CH<sub>2</sub>), 21.6 (CH<sub>3</sub>), 14.2 (CH<sub>3</sub>), 13.6 (CH<sub>3</sub>); HRMS (ESI) *m/z*: 748.2816 [M + Na]<sup>+</sup>, calcd for C<sub>43</sub>H<sub>43</sub>N<sub>3</sub>O<sub>5</sub>SNa; Found 748.2816.

**Ethyl(*E*)-4-((4*R*,5*R*,6*S*,7*S*)-6-(3,4-dimethoxyphenyl)-3'-methyl-5'-oxo-1',7-diphenyl-1-tosyl-1,1',2,3,4,5',6,7-octahydrospiro[indole-5,4'-pyrazol]-4-yl)but-2-enoate (**5aau**):**

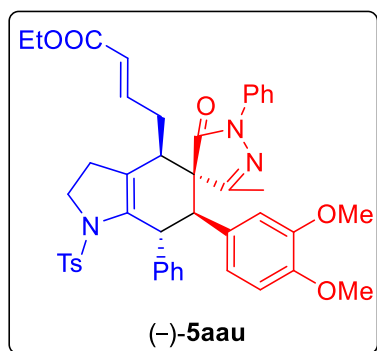

Prepared by following general procedure **D** purified by column chromatography using EtOAc/hexane and isolated product **5aau** in 72% yield as a yellow solid with M. P. 120-125 °C. The enantiomeric excess (*ee*) was determined by chiral stationary phase HPLC using a Daicel Chiralpak IC column (hexane/EtOAc = 70:30, flow rate 0.5 mL/min,  $\lambda$  = 254 nm),  $t_R$  = 17.759 min (major),  $t_R$  = 28.663 min (minor),  $[\alpha]_D^{25}$  = -125.421 (CHCl<sub>3</sub>, *c* = 1.66 g/100mL for 93% *ee*); IR (neat)  $\nu_{\max}$  2926, 1697, 1597, 1596, 1159 and 750. cm<sup>-1</sup>; <sup>1</sup>H NMR

(400 MHz, CDCl<sub>3</sub>)  $\delta$  8.21 (2H, d, *J* = 8.3 Hz), 7.86 (2H, d, *J* = 7.6 Hz), 7.42-7.37 (4H, *m*), 7.20 (1H, t, *J* = 7.4 Hz), 7.09-7.06 (3H, *m*), 6.87 (2H, d, *J* = 6.2 Hz), 6.69 (1H, quin, *J* = 8.5 Hz), 6.42 (1H, d, *J* = 7.9



Hz), 6.18 (1H, br s), 5.61 (1H, d,  $J = 15.5$  Hz), 4.79 (1H, d,  $J = 10.3$  Hz), 4.14-4.02 (2H, m), 3.71 (3H, s), 3.69-3.67 (1H, m), 3.59 (1H, ddd,  $J = 9.3, 9.4, 9.4$  Hz), 3.38 (3H, s), 3.13 (3H, s), 3.01 (1H, d,  $J = 10.5$  Hz), 2.47 (3H, s), 2.17 (1H, quin,  $J = 8.0$  Hz), 2.05-2.01 (1H, m), 1.98 (3H, s), 1.96-1.90 (1H, m), 1.78-1.67 (2H, m), 1.19 (3H, t,  $J = 7.1$  Hz);  $^{13}\text{C}$  NMR (100 MHz,  $\text{CDCl}_3$ , DEPT-135)  $\delta$  172.4 (C, O-C=O), 165.4 (C, N-C=O), 160.6 (C, C=N), 148.7 (C), 148.2 (C), 144.8 (2CH), 143.7 (C), 140.6 (C), 140.5 (C), 137.8 (C), 134.4 (C), 129.5 (3CH), 129.0 (C), 128.9 (4CH), 128.8 (3CH), 127.8 (CH), 127.2 (C), 126.2 (CH), 125.1 (C), 124.0 (CH), 118.7 (2CH), 61.4 (C), 60.4 ( $\text{CH}_2$ ), 56.0 (CH), 55.5 ( $\text{CH}_3$ ), 55.5 ( $\text{CH}_3$ ), 50.0 ( $\text{CH}_2$ ), 44.8 (CH), 40.2 (CH), 31.9 ( $\text{CH}_2$ ), 31.0 ( $\text{CH}_2$ ), 21.7 ( $\text{CH}_3$ ), 14.2 ( $\text{CH}_3$ ), 14.0 ( $\text{CH}_3$ ); HRMS (ESI)  $m/z$ : 782.2870  $[\text{M} + \text{Na}]^+$ , calcd for  $\text{C}_{44}\text{H}_{45}\text{N}_3\text{O}_7\text{SNa}$ ; Found 782.2870.

**Ethyl(*E*)-4-((4*R*,5*R*,6*S*,7*S*)-3'-methyl-5'-oxo-1',7-diphenyl-1-tosyl-6-(2,3,4-trimethoxyphenyl)-1,1',2,3,4,5',6,7-octahydrospiro[indole-5,4'-pyrazol]-4-yl)but-2-enoate (**5aav**):**

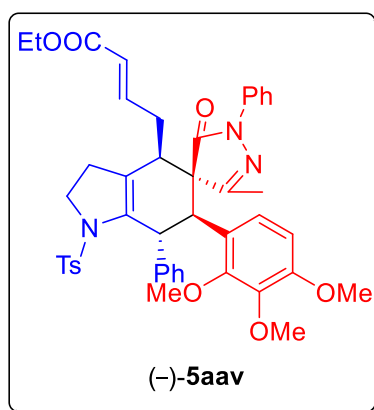

Prepared by following general procedure **D** purified by column chromatography using EtOAc/hexane and isolated product **5aav** in 86% yield as a white solid with M. P. 143-145 °C. The enantiomeric excess (ee) was determined by chiral stationary phase HPLC using a Daicel Chiralpak IC column (hexane/EtOAc = 70:30, flow rate 0.5 mL/min,  $\lambda = 254$  nm),  $t_R = 15.275$  min (major),  $t_R = 21.750$  min (minor),  $[\alpha]_{\text{D}}^{25} = -118.235$  ( $\text{CHCl}_3$ ,  $c = 0.85$  g/100mL for 98% ee); IR (neat)  $\nu_{\text{max}}$  2927, 1718, 1693, 1597, 1498, and 1155.  $\text{cm}^{-1}$ ;  $^1\text{H}$  NMR (400 MHz,  $\text{CDCl}_3$ )  $\delta$  8.21 (2H, d,  $J = 8.2$  Hz), 7.80 (2H, d,  $J = 7.6$  Hz), 7.42 (2H, t,  $J = 7.5$  Hz), 7.37 (2H, d,  $J = 8$  Hz), 7.21 (1H, t,  $J = 7.4$  Hz), 7.14-7.09 (4H, m), 6.92 (1H, br s), 6.71 (1H, quin,  $J = 6.9$  Hz), 6.39 (1H, d,  $J = 8.8$  Hz), 5.62 (1H, d,  $J = 15.5$  Hz), 4.79 (1H, d,  $J = 10.5$  Hz), 4.15-4.04 (2H, m), 3.77 (1H, d,  $J = 10.6$  Hz), 3.7 (3H, s), 3.69-3.68 (1H, m), 3.66 (3H, s), 3.65-3.59 (1H, m), 3.18 (1H, br s), 2.79 (3H, s), 2.45 (3H, s), 2.15 (1H, quin,  $J = 7.2$  Hz), 2.04 (3H, s), 2.02-2.16 (2H, m), 1.86-1.77 (1H, m), 1.7 (1H, br s), 1.21 (3H, t,  $J = 7.1$  Hz);  $^{13}\text{C}$  NMR (100 MHz,  $\text{CDCl}_3$ , DEPT-135)  $\delta$  172.5 (C, O-C=O), 165.7 (C, N-C=O), 161.6 (C, C=N), 152.3 (C), 151.3 (C), 145.1 (2CH), 143.6 (C), 141.4 (C), 141.0 (C), 140.4 (C), 137.8 (C), 134.6 (C), 129.5 (2CH), 128.8 (3CH), 128.7 (2CH), 127.8 (2CH), 127.1 (C), 126.2 (CH), 125.1 (CH), 123.8 (C), 122.7 (C), 122.1 (CH), 119.2 (2CH), 106.9 (CH), 61.8 (C), 60.4 ( $\text{CH}_3, \text{CH}_2$ ), 60.3 ( $\text{CH}_3$ ), 55.7 (CH), 49.9 ( $\text{CH}_2$ ), 45.9 (CH), 44.7 (CH), 40.1 (CH), 31.8 ( $\text{CH}_2$ ), 31.0 ( $\text{CH}_2$ ), 21.6 ( $\text{CH}_3$ ), 14.2 ( $\text{CH}_3$ ), 13.4 ( $\text{CH}_3$ ); HRMS (ESI)  $m/z$ : 812.2976  $[\text{M} + \text{Na}]^+$ , calcd for  $\text{C}_{45}\text{H}_{47}\text{N}_3\text{O}_8\text{SNa}$ ; Found 812.2976.



**Ethyl (E)-4-((4*R*,5*R*,6*S*,7*S*)-6-(3-(benzyloxy)-4-methoxyphenyl)-3'-methyl-5'-oxo-1',7-diphenyl-1-tosyl-1,1',2,3,4,5',6,7-octahydrospiro[indole-5,4'-pyrazol]-4-yl)but-2-enoate (**5aaw**):**

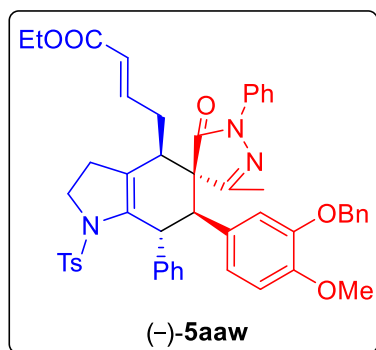

Prepared by following general procedure **D** purified by column chromatography using EtOAc/hexane and isolated product **5aaw** in 61% yield as a pale-yellow solid with M. P. 114-116 °C. The enantiomeric excess (ee) was determined by chiral stationary phase HPLC using a Daicel Chiralpak IC column (hexane/EtOAc = 70:30, flow rate 0.5 mL/min,  $\lambda$  = 254 nm),  $t_R$  = 13.895 min (major),  $t_R$  = 19.989 min (minor),  $[\alpha]_D^{25}$  = **-100.385 (CHCl<sub>3</sub>, c = 0.26 g/100mL for 85% ee)**; IR (neat)  $\nu_{\max}$  2924, 1697, 1595, 1516, 1454, 1257 and

1159. cm<sup>-1</sup>; <sup>1</sup>H NMR (400 MHz, CDCl<sub>3</sub>)  $\delta$  8.20 (2H, d,  $J$  = 8.2 Hz), 7.90 (2H, d,  $J$  = 7.9 Hz), 7.44-7.39 (4H, m), 7.35-7.32 (2H, m), 7.28-7.26 (2H, m), 7.25 (1H, br s), 7.20 (1H, t,  $J$  = 7.4 Hz), 7.02 (3H, br s), 6.71-6.64 (4H, m), 6.43 (1H, d,  $J$  = 6.3 Hz), 5.61 (1H, d,  $J$  = 15.5 Hz), 4.63 (2H, d,  $J$  = 8.7 Hz), 4.53 (1H, d,  $J$  = 12 Hz), 4.14-4.03 (2H, m), 3.71 (3H, s), 3.69-3.66 (1H, m), 3.58 (1H, ddd,  $J$  = 9.3, 9.4, 9.3 Hz), 3.09 (1H, br s), 2.91 (1H, d,  $J$  = 10.4 Hz), 2.48 (3H, s), 2.16 (1H, quin,  $J$  = 7.6 Hz), 2.03-1.88 (5H, m), 1.78-1.62 (2H, m), 1.19 (3H, t,  $J$  = 7.1 Hz); <sup>13</sup>C NMR (100 MHz, CDCl<sub>3</sub>, DEPT-135)  $\delta$  172.4 (C, O-C=O), 165.4 (C, N-C=O), 160.4 (C, C=N), 148.8 (C), 147.6 (C), 144.8 (2CH), 143.6 (C), 140.5 (C), 140.4 (C), 137.9 (C), 136.8 (C), 134.4 (C), 129.5 (3CH), 128.9 (3CH), 128.8 (3CH), 128.7 (C), 128.6 (4CH), 127.9 (CH), 127.6 (2CH), 127.5 (CH), 127.1 (C), 126.1 (CH), 125.2 (CH), 123.9 (CH), 118.8 (2CH), 70.4 (CH<sub>2</sub>), 61.5 (C), 60.4 (CH<sub>2</sub>), 55.8 (CH), 55.6 (CH<sub>3</sub>), 50.0 (C), 44.6 (CH), 40.1 (CH), 31.9 (C), 30.9 (C), 21.7 (CH<sub>3</sub>), 14.2 (CH<sub>3</sub>), 13.8 (CH<sub>3</sub>); HRMS (ESI)  $m/z$ : 858.3183 [M + Na]<sup>+</sup>, calcd for C<sub>50</sub>H<sub>49</sub>N<sub>3</sub>O<sub>7</sub>SNa; Found 858.3184.

**Ethyl(E)-4-((4*R*,5*R*,6*S*,7*S*)-6-(4-hydroxy-3-methoxyphenyl)-3'-methyl-5'-oxo-1',7-diphenyl-1-tosyl-1,1',2,3,4,5',6,7-octahydrospiro[indole-5,4'-pyrazol]-4-yl)but-2-enoate (**5aax**):**

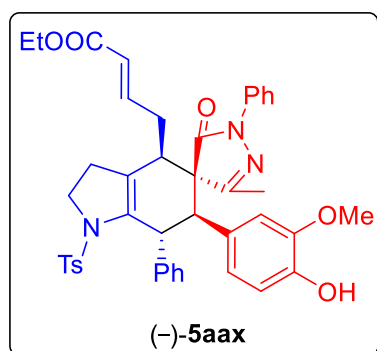

Prepared by following general procedure **D** purified by column chromatography using EtOAc/hexane and isolated product **5aax** in 81% yield as a pale-yellow solid with M. P. 93-95 °C. The enantiomeric excess (ee) was determined by chiral stationary phase HPLC using a Daicel Chiralpak IC column (hexane/EtOAc = 70:30, flow rate 0.5 mL/min,  $\lambda$  = 254 nm),  $t_R$  = 17.520 min (major),  $t_R$  = 25.147 min (minor),  $[\alpha]_D^{25}$  = **-77.647 (CHCl<sub>3</sub>, c = 0.5 g/100mL for 96% ee)**; IR (neat)  $\nu_{\max}$  3410, 2926, 1697, 1597,

1516, 1436 and 1290. cm<sup>-1</sup>; <sup>1</sup>H NMR (400 MHz, CDCl<sub>3</sub>)  $\delta$  8.20 (2H, d,  $J$  = 8.2 Hz), 7.87 (2H, d,  $J$  = 7.6 Hz), 7.43-7.37 (4H, m), 7.21 (1H, t,  $J$  = 7.4 Hz), 7.10-7.05 (3H, m), 6.87 (2H, d,  $J$  = 6.3 Hz), 6.69 (1H, quin,  $J$  = 6.8 Hz), 6.48 (1H, d,  $J$  = 7.9 Hz), 6.1 (1H, br s), 5.62 (1H, d,  $J$  = 15.5 Hz), 5.42 (1H, br s), 4.77 (1H, d,  $J$  = 10.4 Hz), 4.15-4.03 (2H, m), 3.72 (1H, dd,  $J$  = 7.1, 7.1 Hz), 3.59 (1H, ddd,  $J$  = 9.2, 9.2, 9.4 Hz), 3.36 (3H, s), 3.12 (1H, br s), 2.99 (1H, d,  $J$  = 10.5 Hz), 2.47 (3H, s), 2.18 (1H, quin,  $J$  = 7.2 Hz), 2.07-2.01 (1H, m), 1.98 (3H, s), 1.96-1.91 (1H, m), 1.81-1.1 (2H, m), 1.20 (3H, t,  $J$  = 7.1 Hz); <sup>13</sup>C NMR



(100 MHz, CDCl<sub>3</sub>, DEPT-135)  $\delta$  172.5 (C, O=C=O), 165.6 (C, N=C=O), 160.7 (C, C=N), 144.9 (C), 144.8 (2CH), 143.7 (C), 145.0 (C), 144.8 (C), 143.7 (C), 140.6 (C), 140.5 (C), 137.9 (C), 134.4 (C), 132.2 (CH), 132.1 (CH), 129.5 (2CH), 128.8 (2CH), 128.8 (2CH), 128.4 (C), 128.5 (CH), 127.8 (2CH), 127.1 (C), 126.2 (CH), 125.1 (CH), 124.0 (CH), 118.6 (CH), 61.5 (C), 60.4 (CH<sub>2</sub>), 56.1 (CH<sub>3</sub>), 55.6 (CH), 50.0 (CH<sub>2</sub>), 44.8 (CH), 40.1 (CH), 31.9 (CH<sub>2</sub>), 31.0 (CH<sub>2</sub>), 21.6 (CH<sub>3</sub>), 14.2 (CH<sub>3</sub>), 14.0 (CH<sub>3</sub>); HRMS (ESI)  $m/z$ : 768.2714 [M + Na]<sup>+</sup>, calcd for C<sub>43</sub>H<sub>43</sub>N<sub>3</sub>O<sub>7</sub>SNa; Found 768.2714.

**Ethyl(*E*)-4-((4*R*,5*R*,6*S*,7*S*)-6-(3-hydroxy-4-methoxyphenyl)-3'-methyl-5'-oxo-1',7-diphenyl-1-tosyl-1,1',2,3,4,5',6,7-octahydrospiro[indole-5,4'-pyrazol]-4-yl)but-2-enoate (**5aay**):**

Prepared by following general procedure **D** purified by column chromatography using EtOAc/hexane

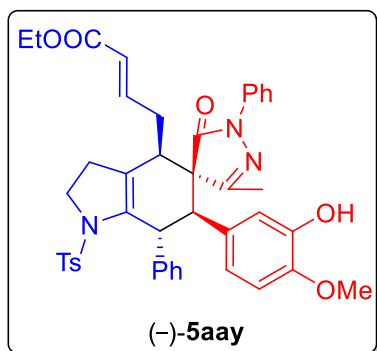

and isolated product **5aay** in 73% yield as a brown solid with M. P. 111-113 °C. The enantiomeric excess (*ee*) was determined by chiral stationary phase HPLC using a Daicel Chiralpak IC column (hexane/EtOAc = 70:30, flow rate 0.5 mL/min,  $\lambda$  = 254 nm),  $t_R$  = 18.298 min (major),  $t_R$  = 23.262 min (minor),  $[\alpha]_D^{25}$  = **-103.485** (CHCl<sub>3</sub>, **c** = **0.66 g/100mL for 92% ee**); IR (neat)  $\nu_{\max}$  3406, 2924, 1699, 1595, 1436, and 1157. cm<sup>-1</sup>; <sup>1</sup>H NMR (400 MHz, CDCl<sub>3</sub>)  $\delta$  8.19 (2H, d,  $J$  = 8.2 Hz), 7.83 (2H, d,  $J$  = 7.6 Hz), 7.42 (2H, t,  $J$  = 8.5 Hz),

7.36 (2H, d,  $J$  = 8.1 Hz), 7.22 (1H, t,  $J$  = 7.4 Hz), 7.11-7.05 (3H, m), 6.90 (2H, d,  $J$  = 6.4 Hz), 6.69 (1H, quin,  $J$  = 7.1 Hz), 6.46 (2H, d,  $J$  = 7.4 Hz), 5.61 (1H, d,  $J$  = 15.4 Hz), 5.33 (1H, br s), 4.80 (1H, d,  $J$  = 9.9 Hz), 4.14-4.06 (2H, m), 3.71 (3H, s), 3.70-3.67 (1H, m), 3.58 (1H, ddd,  $J$  = 9.2, 9.3, 9.4 Hz), 3.11 (1H, br s), 2.97 (1H, d,  $J$  = 10.5 Hz), 2.45 (3H, s), 2.15 (1H, quin,  $J$  = 7.7 Hz), 2.01 (3H, s), 1.96-1.84 (2H, m), 1.78-1.68 (2H, m), 1.21 (3H, t,  $J$  = 7 Hz); <sup>13</sup>C NMR (100 MHz, CDCl<sub>3</sub>, DEPT-135)  $\delta$  172.2 (C, O=C=O), 165.7 (C, N=C=O), 160.6 (C, C=N), 145.8 (C), 145.0 (2CH), 143.6 (C), 140.6 (C), 140.5 (C), 137.7 (C), 134.4 (C), 132.2 (CH), 132.1 (CH), 132.0 (C), 129.6 (C), 129.5 (2CH), 128.8 (3CH), 128.6 (CH), 127.8 (2CH), 127.0 (C), 126.2 (CH), 125.2 (CH), 123.9 (2CH), 119.3 (2CH), 61.5 (C), 60.4 (CH<sub>2</sub>), 55.6 (CH<sub>3</sub>), 55.5 (CH), 50.0 (CH<sub>2</sub>), 44.7 (CH), 40.0 (CH), 31.9 (CH<sub>2</sub>), 31.0 (CH<sub>2</sub>), 22.6 (CH<sub>3</sub>), 14.2 (CH<sub>3</sub>), 14.1 (CH<sub>3</sub>); HRMS (ESI)  $m/z$ : 768.2714 [M + Na]<sup>+</sup>, calcd for C<sub>43</sub>H<sub>43</sub>N<sub>3</sub>O<sub>7</sub>SNa; Found 768.2714.

**Ethyl(*E*)-4-((4*R*,5*R*,6*R*,7*S*)-6-(furan-2-yl)-3'-methyl-5'-oxo-1',7-diphenyl-1-tosyl-1,1',2,3,4,5',6,7-octahydrospiro[indole-5,4'-pyrazol]-4-yl)but-2-enoate (**5aaz**):**

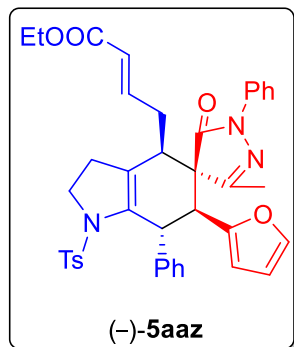

Prepared by following general procedure **D** purified by column chromatography using EtOAc/hexane and isolated product **5aaz** in 78% yield as a brown solid with M. P. 123-125 °C. The enantiomeric excess (*ee*) was determined by chiral stationary phase HPLC using a Daicel Chiralpak IA column (hexane/EtOAc = 70:30, flow rate 0.5 mL/min,  $\lambda$  = 254 nm),  $t_R$  = 14.108 min (major),  $t_R$  = 20.160 min (minor),  $[\alpha]_D^{25}$  = **-90.556** (CHCl<sub>3</sub>, **c** = **0.18 g/100mL for 96% ee**); IR (neat)  $\nu_{\max}$  2924, 1705, 1597, 1498, 1159

and 752. cm<sup>-1</sup>; <sup>1</sup>H NMR (400 MHz, CDCl<sub>3</sub>)  $\delta$  8.18 (2H, d,  $J$  = 8.2 Hz), 7.82 (2H, d,  $J$  = 7.6 Hz), 7.43 (2H, t,  $J$  = 7.5 Hz), 7.37 (2H, d,  $J$  = 8.1 Hz), 7.22 (1H, t,  $J$  = 7.4 Hz), 7.16 (2H, d,  $J$  = 7.36), 7.06 (1H, d,



$J = 1.5$  Hz), 6.97 (2H, d,  $J = 6.5$  Hz), 6.68 (1H, quin,  $J = 7.2$  Hz), 6.04 (1H, dd,  $J = 1.8, 1.8$ ), 5.83 (2H, d,  $J = 3.16$  Hz), 5.62 (1H, d,  $J = 15.4$  Hz), 4.90 (1H, d,  $J = 9.84$  Hz), 4.16-4.04 (2H, m), 3.72 (1H, dd,  $J = 7.2, 7.3$  Hz), 3.60 (1H, ddd,  $J = 9.2, 9.4, 9.3$  Hz), 3.24 (1H, d,  $J = 10.6$  Hz), 3.10 (1H, br s), 2.45 (3H, s), 2.16 (1H, quin,  $J = 7.9$  Hz), 2.05 (3H, s), 2.03-1.90 (2H, m), 1.77-1.67 (2H, m), 1.21 (3H, t,  $J = 7.1$  Hz);  $^{13}\text{C}$  NMR (100 MHz,  $\text{CDCl}_3$ , DEPT-135)  $\delta$  172.6 (C, O-C=O), 166.6 (C, N-C=O), 160.0 (C, C=N), 150.2 (C), 144.6 (2CH), 143.7 (C), 141.8 (C), 140.4 (C), 139.1 (C), 137.8 (C), 134.2 (C), 129.5 (2CH), 128.8 (3CH), 128.7 (CH), 127.9 (2CH), 126.6 (C), 125.2 (CH), 124.1 (CH), 119.0 (3CH), 110.1 (CH), 108.0 (CH), 60.4 ( $\text{CH}_2$ ), 60.2 (C), 50.0 ( $\text{CH}_2$ ), 49.4 (CH), 43.1 (CH), 39.4 (CH), 31.9 ( $\text{CH}_2$ ), 30.9 ( $\text{CH}_2$ ), 21.6 ( $\text{CH}_3$ ), 14.2 ( $\text{CH}_3$ ), 13.6 ( $\text{CH}_3$ ); HRMS (ESI)  $m/z$ : 712.2452  $[\text{M} + \text{Na}]^+$ , calcd for  $\text{C}_{40}\text{H}_{39}\text{N}_3\text{O}_6\text{SNa}$ ; Found 712.2465.

**Ethyl(*E*)-4-((4*R*,5*R*,6*R*,7*S*)-3'-methyl-5'-oxo-1',7-diphenyl-6-(thiophen-2-yl)-1-tosyl-1,1',2,3,4,5',6,7-octahydrospiro[indole-5,4'-pyrazol]-4-yl)but-2-enoate (**5aaa'**):**

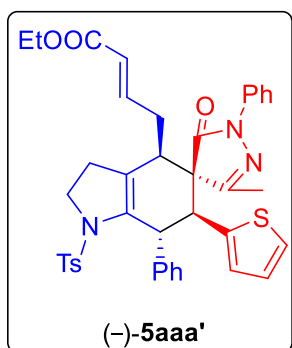

Prepared by following general procedure **D** purified by column chromatography using EtOAc/hexane and isolated product **5aaa'** in 85% yield as a yellow solid with M. P. 120-122 °C. The enantiomeric excess (ee) was determined by chiral stationary phase HPLC using a Daicel Chiralpak IC column (hexane/EtOAc = 70:30, flow rate 0.5 mL/min,  $\lambda = 254$  nm),  $t_R = 16.356$  min (major),  $t_R = 19.423$  min (minor),  $[\alpha]_{\text{D}}^{25} = -107.981$  ( $\text{CHCl}_3$ ,  $c = 0.83$  g/100mL for 96% ee); IR (neat)  $\nu_{\text{max}}$  2926, 1699, 1597, 1498, 1456,

1159 and 688.  $\text{cm}^{-1}$ ;  $^1\text{H}$  NMR (400 MHz,  $\text{CDCl}_3$ )  $\delta$  8.19 (2H, d,  $J = 8$  Hz), 7.88 (2H, d,  $J = 7.6$  Hz), 7.44 (2H, t,  $J = 8.4$  Hz), 7.38 (2H, d,  $J = 8.4$  Hz), 7.23 (1H, t,  $J = 7.6$  Hz), 7.14-7.10 (2H, m), 6.96-6.93 (3H, m), 6.72-6.65 (2H, m), 6.57 (1H, d,  $J = 3.6$  Hz), 5.61 (1H, d,  $J = 15.6$  Hz), 4.82 (1H, d,  $J = 10.4$  Hz), 4.16-4.04 (2H, m), 3.70 (1H, dd,  $J = 7.2, 7.3$  Hz), 3.58 (1H, ddd,  $J = 9.2, 9.2, 9.2$  Hz), 3.37 (1H, d,  $J = 10.4$ ), 3.18 (1H, br s), 2.46 (3H, s), 2.15 (1H, quin,  $J = 7.2$  Hz), 2.04 (3H, s), 2.03-1.98 (1H, m), 1.95-1.89 (1H, m), 1.75-1.66 (2H, m), 1.21 (3H, t,  $J = 7.2$  Hz);  $^{13}\text{C}$  NMR (100 MHz,  $\text{CDCl}_3$ , DEPT-135)  $\delta$  171.7 (C, O-C=O), 165.6 (C, N-C=O), 160.2 (C, C=N), 144.7 (2CH), 143.7 (C), 140.4 (C), 138.8 (C), 137.8 (C), 134.2 (C), 129.5 (2CH), 128.8 (3CH), 128.8 (2CH), 127.9 (2CH), 127.4 (C), 126.6 (CH), 126.4 (CH), 125.8 (C), 125.2 (CH), 124.4 (CH), 124.0 (CH), 119.1 (2CH), 61.5 (C), 60.4 ( $\text{CH}_2$ ), 50.7 (CH), 50.1 ( $\text{CH}_2$ ), 46.2 (CH), 39.8 (CH), 31.9 ( $\text{CH}_2$ ), 31.0 ( $\text{CH}_2$ ), 21.6 ( $\text{CH}_3$ ), 14.2 ( $\text{CH}_3$ ), 13.9 ( $\text{CH}_3$ ); HRMS (ESI)  $m/z$ : 728.2223  $[\text{M} + \text{Na}]^+$ , calcd for  $\text{C}_{40}\text{H}_{39}\text{N}_3\text{O}_5\text{S}_2\text{Na}$ ; Found 728.2224.



**Ethyl(*E*)-4-((4*R*,5*R*,6*S*,7*S*)-3'-methyl-5'-oxo-6,7-diphenyl-1-tosyl-1'-(4-(trifluoromethyl)phenyl)-1,1',2,3,4,5',6,7-octahydrospiro[indole-5,4'-pyrazol]-4-yl)but-2-enoate (**5aba**):**

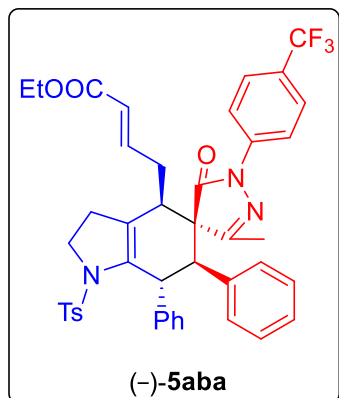

Prepared by following general procedure **D** purified by column chromatography using EtOAc/hexane and isolated product **5aba** in 69% yield as a white solid with M. P. 133-135 °C. The enantiomeric excess (ee) was determined by chiral stationary phase HPLC using a Daicel Chiralpak IC column (hexane/EtOAc = 70:30, flow rate 0.5 mL/min,  $\lambda$  = 254 nm),  $t_R$  = 11.002 min (major),  $t_R$  = 14.378 min (minor);  $[\alpha]_D^{25}$  = -121.667 (CHCl<sub>3</sub>,  $c$  = 0.11 g/100mL, CHCl<sub>3</sub> for 96% ee); IR (neat)  $\nu_{\max}$  2924, 1712, 1654, 1614, 1494, and 1325. cm<sup>-1</sup>; <sup>1</sup>H NMR (400 MHz, CDCl<sub>3</sub>)  $\delta$  8.19 (2H, d,  $J$  = 8.2 Hz), 7.99 (2H, d,  $J$  = 8.5 Hz), 7.66 (2H, d,  $J$  = 8.6 Hz), 7.39 (2H, d,  $J$  = 8 Hz), 7.10-7.03 (4H, m), 6.99 (2H, t,  $J$  = 7.2 Hz), 6.93-6.79 (3H, m), 6.65 (1H, quin,  $J$  = 8.2 Hz), 5.58 (1H, d,  $J$  = 15.4 Hz), 4.84 (1H, d,  $J$  = 10.32 Hz), 4.11-3.99 (2H, m), 3.75-3.57 (2H, m), 3.18 (1H, br s), 3.09 (1H, d,  $J$  = 10.5 Hz), 2.47 (3H, s), 2.22-2.17 (1H, m), 2.06-2.02 (1H, m), 2.01 (3H, s), 1.99-1.94 (1H, m), 1.92-1.67 (2H, m), 1.18 (3H, t,  $J$  = 7.1 Hz); <sup>13</sup>C NMR (100 MHz, CDCl<sub>3</sub>, DEPT-135)  $\delta$  172.6 (C, O-C=O), 165.5 (C, N-C=O), 161.1 (C, C=N), 144.3 (2CH), 143.8(C), 140.6 (C), 140.3 (C), 140.2 (C), 136.2 (C), 134.4 (C), 129.5(CH), 128.8 (C) 128.7 (2CH), 128.3 (2CH), 127.9 (CH), 127.8 (3CH), 126.9 (C), 126.7 (C, CF<sub>3</sub>, q,  $J$  = 32.5 Hz), 126.3(CH), 126.1 (2CH, d,  $J$  = 4 Hz), 124.1 (2CH), 118.3 (3CH), 61.6 (C), 60.4 (CH<sub>2</sub>), 56.3 (CH), 50.0 (CH<sub>2</sub>), 44.6 (CH), 40.0 (CH), 32.0 (CH<sub>2</sub>), 30.8 (CH<sub>2</sub>), 21.6 (CH<sub>3</sub>), 14.1 (CH<sub>3</sub>), 14.1 (CH<sub>3</sub>); HRMS (ESI)  $m/z$ : 790.2533 [M + Na]<sup>+</sup>, calcd for C<sub>43</sub>H<sub>40</sub>N<sub>3</sub>O<sub>5</sub>SF<sub>3</sub>Na; Found 790.2532.

**Ethyl(*E*)-4-((4*R*,5*R*,6*S*,7*S*)-3'-methyl-1'-(3-nitrophenyl)-5'-oxo-6,7-diphenyl-1-tosyl-1,1',2,3,4,5',6,7-octahydrospiro[indole-5,4'-pyrazol]-4-yl)but-2-enoate (**5abb**):**

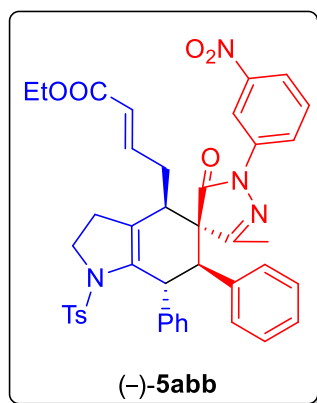

Prepared by following general procedure **D** purified by column chromatography using EtOAc/hexane and isolated product **5abb** in 56% yield as a pale-yellow solid with M. P. 112-114 °C. The enantiomeric excess (ee) was determined by chiral stationary phase HPLC using a Daicel Chiralpak IA column (hexane/EtOAc = 70:30, flow rate 0.5 mL/min,  $\lambda$  = 254 nm),  $t_R$  = 18.343 min (minor),  $t_R$  = 25.241 min (major),  $[\alpha]_D^{25}$  = -113.394 (CHCl<sub>3</sub>,  $c$  = 0.54 g/100mL for 95% ee); IR (neat)  $\nu_{\max}$  2926, 1708, 1527, 1597, 1348 and 1157 cm<sup>-1</sup>; <sup>1</sup>H NMR (400 MHz, CDCl<sub>3</sub>)  $\delta$  8.73 (1H, t,  $J$  = 2.1 Hz), 8.27-8.25 (1H, m), 8.18 (2H, d,  $J$  = 8.3 Hz), 8.07-8.04 (1H, m), 7.59 (1H, t,  $J$  = 8.2 Hz), 7.41 (2H, d,  $J$  = 8 Hz), 7.09-7.03 (4H, m), 6.99 (2H, t,  $J$  = 7.6 Hz), 6.93-6.81(3H, m), 6.65 (1H, quin,  $J$  = 7.2 Hz), 5.58 (1H, d,  $J$  = 15.4 Hz), 4.82 (1H, d,  $J$  = 10.4 Hz), 4.11-4.0 (2H, m), 3.78-3.59 (2H, m), 3.20 (1H, br s), 3.10 (1H, d,  $J$  = 10.5 Hz), 2.48 (3H, s), 2.22-2.15 (1H, m), 2.03 (3H, s), 2.01-1.97 (1H, m), 1.89-1.79 (1H, m), 1.66 (2H, br s), 1.17 (3H, t,  $J$  = 7.2 Hz); <sup>13</sup>C NMR (100 MHz, CDCl<sub>3</sub>, DEPT-135)  $\delta$  172.6 (C, O-C=O), 165.4 (C, N-C=O), 161.5 (C, C=N), 148.6 (C), 144.3 (2CH), 143.9 (C), 140.5 (C), 140.2 (C), 138.5 (C), 136.2 (C), 134.4 (C), 129.8 (CH), 129.5 (3CH), 128.7 (3CH), 128.4 (2CH), 128.0 (CH), 127.8 (3CH), 126.5 (C), 126.4 (CH), 124.1 (CH),



123.8 (CH), 119.4 (CH), 113.4 (CH), 61.8 (C), 60.5 (CH<sub>2</sub>), 56.3 (CH), 50.0 (CH<sub>2</sub>), 44.6 (CH), 40.0 (CH), 32.0 (CH<sub>2</sub>), 30.8 (CH<sub>2</sub>), 21.7 (CH<sub>3</sub>), 14.2 (CH<sub>3</sub>), 14.1 (CH<sub>3</sub>); HRMS (ESI) *m/z*: 767.2510 [M + Na]<sup>+</sup>, calcd for C<sub>42</sub>H<sub>40</sub>N<sub>4</sub>O<sub>7</sub>Na; Found 767.2509.

**Ethyl(*E*)-4-((4*R*,5*R*,6*S*,7*S*)-1'-(3-chlorophenyl)-3'-methyl-5'-oxo-6,7-diphenyl-1-tosyl-1,1',2,3,4,5',6,7-octahydrospiro[indole-5,4'-pyrazol]-4-yl)but-2-enoate (**5abc**):**

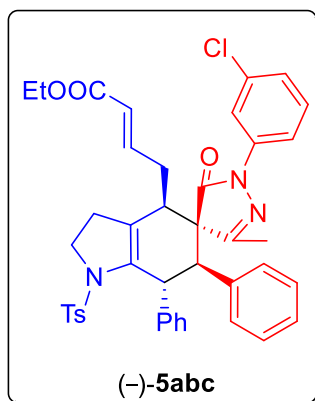

Prepared by following general procedure **D** purified by column chromatography using EtOAc/hexane and isolated product **5abc** in 76% yield as a brown solid with M. P. 104-106 °C. The enantiomeric excess (ee) was determined by chiral stationary phase HPLC using a Daicel Chiralpak IC column (hexane/EtOAc = 70:30, flow rate 0.5 mL/min, λ = 254 nm), *t<sub>R</sub>* = 15.510 min (major), *t<sub>R</sub>* = 21.719 min (minor), [α]<sub>D</sub><sup>25</sup> = -101.488 (CHCl<sub>3</sub>, c = 0.33 g/100mL for 88% ee); IR (neat) ν<sub>max</sub> 2924, 2360, 1708, 1593, 1481 and 732 cm<sup>-1</sup>; <sup>1</sup>H NMR (400 MHz, CDCl<sub>3</sub>) δ 8.18 (2H, d, *J* = 8.2 Hz), 7.84 (1H, t, *J* = 1.9 Hz), 7.81-7.78 (1H, m), 7.39 (2H, d, *J* = 8 Hz), 7.33 (1H, t, *J* = 8.1 Hz), 7.18-7.16 (1H, m), 7.07-6.98 (6H, m), 6.88-6.86 (3H, m), 6.65 (1H, quin, *J* = 7.2 Hz), 5.60 (1H, d, *J* = 15.4 Hz), 4.84-4.81 (1H, m), 4.13-4.05 (2H, m), 3.74-3.55 (2H, m), 3.16 (1H, br s), 3.08 (1H, d, *J* = 10.5 Hz), 2.46 (3H, s), 2.44-2.39 (1H, m), 2.20-2.12 (1H, m), 2.03-2.01 (1H, m), 1.98 (3H, s), 1.96-1.92 (1H, m), 1.82-1.73 (1H, m), 1.19 (3H, t, *J* = 7.1 Hz); <sup>13</sup>C NMR (100 MHz, CDCl<sub>3</sub>, DEPT-135) δ 172.3 (C, O=C=O), 165.5 (C, N=C=O), 160.9 (C, C=N), 144.5 (2CH), 143.8 (C), 140.4 (C), 140.3 (C), 138.7 (C), 136.3 (C), 134.5 (C), 134.4 (C), 129.9 (CH), 129.5 (3CH), 128.7 (3CH), 128.3 (CH), 127.8 (CH), 127.7 (3CH), 127.0 (C), 126.3 (CH), 125.0 (CH), 124.1 (CH), 118.8 (CH), 116.7 (2CH), 61.5 (C), 60.4 (CH<sub>2</sub>), 56.2 (CH), 50.0 (CH<sub>2</sub>), 44.6 (CH), 39.9 (CH), 32.0 (CH<sub>2</sub>), 30.8 (CH<sub>2</sub>), 21.7 (CH<sub>3</sub>), 14.2 (CH<sub>3</sub>), 14.0 (CH<sub>3</sub>); HRMS (ESI) *m/z*: 756.2269 [M + Na]<sup>+</sup>, calcd for C<sub>42</sub>H<sub>40</sub>ClN<sub>3</sub>O<sub>5</sub>Na; Found 756.2270.

**Ethyl(*E*)-4-((4*R*,5*R*,6*S*,7*S*)-7-(4-chlorophenyl)-3'-methyl-5'-oxo-1',6-diphenyl-1-tosyl-1,1',2,3,4,5',6,7-octahydrospiro[indole-5,4'-pyrazol]-4-yl)but-2-enoate (**5baa**):**

Prepared by following general procedure **D** purified by column chromatography using EtOAc/hexane and isolated product **5baa** in 67% yield as a yellow solid with M. P. 113-115 °C. The enantiomeric excess (ee) was determined by chiral stationary phase HPLC using a Daicel Chiralpak IC column (hexane/EtOAc = 70:30, flow rate 0.5 mL/min, λ = 254 nm), *t<sub>R</sub>* = 9.872 min (major), *t<sub>R</sub>* = 14.363 min (minor), [α]<sub>D</sub><sup>25</sup> = -121.0 (CHCl<sub>3</sub>, c = 0.08 g/100mL for 97% ee); IR (neat) ν<sub>max</sub> 2922, 1720, 1695, 1597, 1456 and 677 cm<sup>-1</sup>; <sup>1</sup>H NMR (400 MHz, CDCl<sub>3</sub>) δ 8.2 (2H, d, *J* = 8.2 Hz), 7.78 (2H, d, *J* = 7.5 Hz), 7.44-7.38 (4H, m), 7.22 (1H, t, *J* = 7.4 Hz), 7.1-6.99 (6H, m), 6.81-6.79 (2H, m), 6.68 (1H, quin, *J* = 7 Hz), 5.62 (1H, d, *J* = 15.5 Hz), 4.87-4.84 (1H, m), 4.13-4.05 (2H, m), 3.74-3.55 (2H, m), 3.13 (1H, br s), 3.01 (1H, d, *J* = 10.5 Hz), 2.47

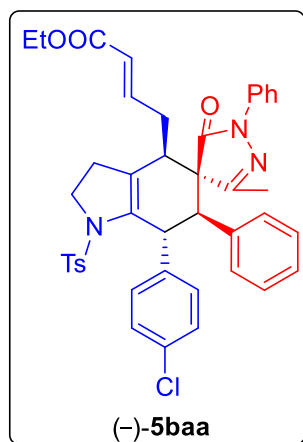



(3H, s), 2.43-2.37 (1H, m), 2.2-2.13 (1H, m), 2.05-2.02 (1H, m), 2.0 (3H, s), 1.96-1.92 (1H, m), 1.8-1.71 (1H, m), 1.2 (3H, t,  $J = 7.1$  Hz);  $^{13}\text{C}$  NMR (100 MHz,  $\text{CDCl}_3$ , DEPT-135)  $\delta$  172.0 (C, O-C=O), 165.6 (C, N-C=O), 160.1 (C, C=N), 144.6 (2CH), 143.8 (C), 140.0 (C), 139.1 (C), 137.6 (C), 136.1 (C), 134.2 (C), 131.9 (C), 129.5 (3CH), 128.8 (3CH), 128. (3CH), 128.4 (CH), 128.0 (2CH), 127.9 (CH), 127.3 (C), 125.3 (CH), 124.0 (CH), 119.13 (3CH), 61.3 (C), 60.4 ( $\text{CH}_2$ ), 56.1 (CH), 50.0 ( $\text{CH}_2$ ), 44.0 (CH), 40.0 (CH), 31.8 ( $\text{CH}_2$ ), 31.0 ( $\text{CH}_2$ ), 21.6 ( $\text{CH}_3$ ), 14.2 ( $\text{CH}_3$ ), 14.0 ( $\text{CH}_3$ ); HRMS (ESI)  $m/z$ : 756.2269  $[\text{M} + \text{Na}]^+$ , calcd for  $\text{C}_{42}\text{H}_{40}\text{ClN}_3\text{O}_5\text{SNa}$ ; Found 756.2277.

**Ethyl(*E*)-4-((4*R*,5*R*,6*S*,7*S*)-3'-methyl-5'-oxo-1',6-diphenyl-7-(*p*-tolyl)-1-tosyl-1',1',2,3,4,5',6,7-octahydrospiro[indole-5,4'-pyrazol]-4-yl)but-2-enoate (**5caa**):**

Prepared by following general procedure **D** purified by column chromatography using EtOAc/hexane

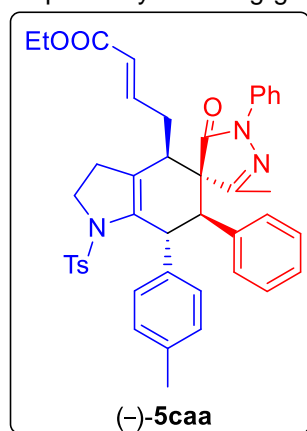

and isolated product **5caa** in 59% yield as a brown solid with M. P. 114-116 °C. The enantiomeric excess (ee) was determined by chiral stationary phase HPLC using a Daicel Chiralpak IC column (hexane/EtOAc = 70:30, flow rate 0.5 mL/min,  $\lambda = 254$  nm),  $t_R = 10.891$  min (major),  $t_R = 16.790$  min (minor),  $[\alpha]_D^{25} = -125.076$  ( $\text{CHCl}_3$ ,  $c = 0.33\text{g}/100\text{mL}$  for 97% ee); IR (neat)  $\nu_{\text{max}}$  2924, 1699, 1597, 1498 and 1159  $\text{cm}^{-1}$ ;  $^1\text{H}$  NMR (400 MHz,  $\text{CDCl}_3$ )  $\delta$  8.2 (2H, d,  $J = 8.2$  Hz), 7.78 (2H, d,  $J = 7.6\text{Hz}$ ), 7.43-7.36 (4H, m), 7.21 (1H, t,  $J = 7.4$  Hz), 7.07-6.99 (4H, m), 6.87-6.86 (2H, m), 6.76-6.66 (3H, m), 5.61 (1H, d,  $J = 15.4$  Hz), 4.83-4.80 (1H, m), 4.15-4.03 (2H, m), 3.73-3.55 (2H, m), 3.13 (1H, br s), 3.07 (1H, d,  $J = 10.5$  Hz), 2.46 (3H, s), 2.19 (3H, s), 2.18-2.12 (1H, m), 2.05-2.01 (1H, m), 2.0 (3H, s), 1.95-1.91 (1H, m), 1.79-1.69 (2H, m), 1.2 (3H, t,  $J = 7.1$  Hz);

$^{13}\text{C}$  NMR (100 MHz,  $\text{CDCl}_3$ , DEPT-135)  $\delta$  172.1 (C, O-C=O), 165.6 (C, N-C=O), 160.3 (C, C=N), 144.9 (2CH), 143.6 (C), 140.7 (C), 137.6 (C), 137.3 (C), 136.6 (C), 135.5 (C), 134.5 (C), 129.4 (2CH), 128.8 (4C), 128.5 (2CH), 128.2 (CH), 127.7 (CH), 126.8 (C), 125.2 (CH), 123.9 (CH), 119.2 (2CH), 61.5 (C), 60.4 ( $\text{CH}_2$ ), 56.2 (CH), 50.0 ( $\text{CH}_2$ ), 44.1 (CH), 40.0 (CH), 31.9 ( $\text{CH}_2$ ), 30.9 ( $\text{CH}_2$ ), 21.6 ( $\text{CH}_3$ ), 21.1 ( $\text{CH}_3$ ), 14.2 ( $\text{CH}_3$ ), 14.0 ( $\text{CH}_3$ ); HRMS (ESI)  $m/z$ : 736.2816  $[\text{M} + \text{Na}]^+$ , calcd for  $\text{C}_{43}\text{H}_{43}\text{N}_3\text{O}_5\text{SNa}$ ; Found 736.2816.

**Ethyl(*E*)-4-((4*R*,5*R*,6*S*,7*S*)-6-(4-fluorophenyl)-3'-methyl-5'-oxo-7-phenyl-1-tosyl-1'-(4-(trifluoromethyl)phenyl)-1',1',2,3,4,5',6,7-octahydrospiro[indole-5,4'-pyrazol]-4-yl)but-2-enoate (**5abd**):**



Prepared by following general procedure **D** purified by column chromatography using EtOAc/hexane

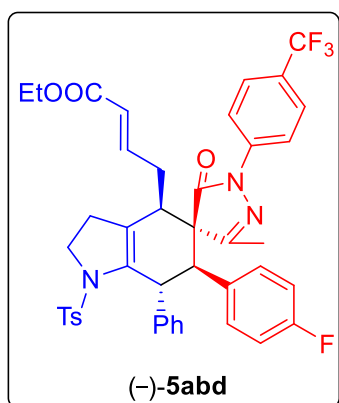

and isolated product **5abd** in 70% yield as a white solid with M. P. 172-175 °C. The enantiomeric excess (ee) was determined by chiral stationary phase HPLC using a Daicel Chiralpak IC column (hexane/EtOAc = 75:25, flow rate 0.5 mL/min,  $\lambda$  = 254 nm),  $t_R$  = 12.870 min (major),  $t_R$  = 18.881 min (minor);  $[\alpha]_D^{25}$  = -95.385 (CHCl<sub>3</sub>, c = 0.85 g/100mL for 99.9% ee); IR (neat)  $\nu_{\max}$  2924, 1712, 1614, 1512, 1157

and 1325. cm<sup>-1</sup>; <sup>1</sup>H NMR (400 MHz, CDCl<sub>3</sub>)  $\delta$  8.17 (2H, d,  $J$  = 8.2 Hz), 8.0 (2H, d,  $J$  = 8.5 Hz), 7.67 (2H, d,  $J$  = 8.6 Hz), 7.39 (2H, d,  $J$  = 8 Hz), 7.09-7.07 (3H, m), 6.87-6.85 (3H, m), 6.72-6.59 (3H, m), 5.58 (1H, d,  $J$

= 15.4 Hz), 4.79-4.77 (1H, m), 4.11-3.99 (2H, m), 3.75-3.56 (2H, m), 3.18 (1H, br s), 3.09 (1H, d,  $J$  = 10.5 Hz), 2.47 (3H, s), 2.22-2.14 (1H, m), 2.06-2.03 (1H, m), 2.01 (3H, s), 1.98-1.93 (1H, m), 1.84-1.74 (1H, m), 1.65-1.60 (1H, m), 1.16 (3H, t,  $J$  = 7.1 Hz); <sup>13</sup>C NMR (100 MHz, CDCl<sub>3</sub>, DEPT-135)  $\delta$  172.5 (C, O-C=O), 165.4 (C, N-C=O), 162.1 (C, C-F, d,  $J$  = 245.4 Hz), 161.0 (C, C=N), 144.1 (2CH), 143.9 (C), 140.4 (C), 140.2 (C), 140.1 (C), 134.3 (C), 131.2 (C), 131.2 (C), 129.5 (2CH), 128.8 (CH), 128.7 (2CH), 127.9 (2CH), 126.9 (C), 126.7 (C-CF<sub>3</sub>, q,  $J$  = 32.5 Hz), 126.4 (CH), 126.1 (2CH, d,  $J$  = 4 Hz), 124.1 (2CH), 118.3 (3CH), 115.3 (2CH, d,  $J$  = 21 Hz), 61.5 (C), 60.4 (CH<sub>2</sub>), 55.5 (CH), 50.0 (CH<sub>2</sub>), 44.8 (CH), 39.9 (CH), 32.0 (CH<sub>2</sub>), 30.7 (CH<sub>2</sub>), 21.6 (CH<sub>3</sub>), 14.1 (CH<sub>3</sub>), 14.1 (CH<sub>3</sub>); HRMS (ESI)  $m/z$ : 808.2439 [M + Na]<sup>+</sup>, calcd for C<sub>43</sub>H<sub>39</sub>N<sub>3</sub>O<sub>5</sub>SF<sub>4</sub>Na; Found 808.2438

**Ethyl(E)-4-((4*R*,5*R*,6*S*,7*S*)-3'-methyl-5'-oxo-7-phenyl-1-tosyl-1'-(4 (trifluoromethyl) phenyl)-6-(2,3,4-trimethoxyphenyl)-1,1',2,3,4,5',6,7-octahydrospiro[indole-5,4'-pyrazol]-4-yl)but-2-enoate (**5abe**):**

Prepared by following general procedure **D** purified by column chromatography using EtOAc/hexane

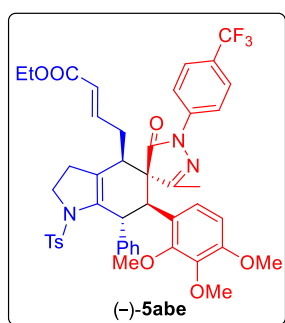

and isolated product **5aba** in 81% yield as a white solid with M. P. 175-180 °C. The enantiomeric excess (ee) was determined by chiral stationary phase HPLC using a Daicel Chiralpak IC column (hexane/EtOAc = 75:25, flow rate 0.5 mL/min,  $\lambda$  = 254 nm),  $t_R$  = 15.239 min (major),  $t_R$  = 24.042 min (minor);  $[\alpha]_D^{25}$  = -119.875 (CHCl<sub>3</sub>, c = 0.8 g/100 mL for 98% ee); IR (neat)  $\nu_{\max}$  2941, 1722, 1705, 1610, 1498, 1321, and 1157. cm<sup>-1</sup>; <sup>1</sup>H NMR (400 MHz, CDCl<sub>3</sub>)  $\delta$  8.19 (2H, d,  $J$  = 8.2 Hz), 8.01 (2H, d,  $J$  = 8.5 Hz), 7.66 (2H, d,  $J$  = 8.6 Hz), 7.39 (2H, d,  $J$  = 8 Hz), 7.09-7.01 (4H, m), 6.92 (1H, br s), 6.65 (1H, quin,  $J$  =

6.8 Hz), 6.38 (1H, d,  $J$  = 8.9 Hz), 5.58 (1H, d,  $J$  = 15.4 Hz), 4.78-4.75 (1H, m), 4.12-3.98 (2H, m), 3.79 (1H, d,  $J$  = 10.6 Hz), 3.75-3.72 (1H, m), 3.7 (3H, s), 3.67 (3H, s), 3.65-3.61 (1H, m), 3.23 (1H, br s), 2.8 (3H, s), 2.46 (3H, s), 2.19-2.11 (1H, m), 2.06 (3H, s), 2.04-1.98 (2H, m), 1.96-1.74 (2H, m), 1.17 (3H, t,  $J$  = 7.1 Hz); <sup>13</sup>C NMR (100 MHz, CDCl<sub>3</sub>, DEPT-135)  $\delta$  173.1 (C, O-C=O), 165.5 (C, N-C=O), 163.3 (C, C=N), 152.8 (C), 151.4 (C), 144.6 (2CH), 143.7(C), 141.5 (C), 140.8 (C), 140.5 (C), 134.6 (C), 129.5 (2CH), 128.6(2CH), 127.8 (2CH), 126.9 (C), 126.4 (C, -CF<sub>3</sub>, q,  $J$  = 32.5 Hz), 126.3 (CH), 125.9 (2CH, q,  $J$  = 4 Hz), 125.5 (C), 123.9 (2CH), 122.5 (C), 121.9 (CH), 118.3 (2CH), 106.9 (CH), 61.9 (C), 60.4



(CH<sub>3</sub>), 60.3 (CH<sub>2</sub>, CH<sub>3</sub>), 55.7 (CH<sub>3</sub>), 49.8 (CH<sub>2</sub>), 46.1 (CH), 44.8 (CH), 40.09 (CH), 31.9 (CH<sub>2</sub>), 30.7 (CH<sub>2</sub>), 21.6 (CH<sub>3</sub>), 14.1 (CH<sub>3</sub>), 13.4 (CH<sub>3</sub>); HRMS (ESI) *m/z*: 880.2850 [M + Na]<sup>+</sup>, calcd for C<sub>46</sub>H<sub>46</sub>N<sub>3</sub>O<sub>8</sub>SF<sub>3</sub>Na; Found 880.2841.

**2-((4*R*,5*R*,6*S*,7*S*)-3'-methyl-5'-oxo-1',6,7-triphenyl-1-tosyl-1,1',2,3,4,5',6,7-octahydrospiro[indole-5,4'-pyrazol]-4-yl)ethyl)malononitrile (6aaa):**

Prepared by following general procedure **E** purified by column chromatography using EtOAc/hexane and isolated product **6aaa** in 80% yield as a yellow solid with M. P. 148-150 °C.

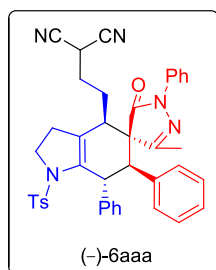

$[\alpha]_D^{25} = -139.000$  (CHCl<sub>3</sub>, *c* = 0.1 g/100ml); IR (neat)  $\nu_{\max}$  2924, 1693, 1597, 1492 and 1159 cm<sup>-1</sup>; <sup>1</sup>H NMR (400 MHz, CDCl<sub>3</sub>)  $\delta$  8.20 (2H, d, *J* = 8.2 Hz), 7.75 (2H, d, *J* = 7.6 Hz), 7.47-7.43 (2H, m), 7.38 (2H, d, *J* = 7.9 Hz), 7.29-7.27 (1H, m), 7.09-6.98 (7H, m), 6.88-6.86 (3H, m), 4.87-4.85 (1H, m), 3.81-3.61 (2H, m), 3.48 (1H, t, *J* = 6.5 Hz), 3.12-3.06 (2H, m), 2.45 (3H, s), 2.10-2.03 (1H, m), 2.01 (3H, s), 1.97-1.89 (2H, m), 1.86-1.74 (3H, m); <sup>13</sup>C NMR (100 MHz, CDCl<sub>3</sub>, DEPT-135)

$\delta$  172.4 (C, N-C=O), 161.0 (C, C=N), 144.3 (C), 141.5 (C), 140.3 (C), 137.5 (C), 136.2 (C), 134.1 (C), 129.7 (3CH), 129.2 (3CH), 128.9 (3CH), 128.5 (CH), 128.0 (CH), 127.9 (3CH), 126.6 (C), 126.5 (CH), 125.9 (CH), 119.6 (3CH), 112.0 (C, CN), 111.8 (C, CN), 61.3 (C), 56.5 (CH), 50.0 (CH<sub>2</sub>), 44.5 (CH), 39.7 (CH), 30.6 (CH<sub>2</sub>), 28.6 (CH<sub>2</sub>), 26.3 (CH<sub>2</sub>), 22.9 (CH), 21 (CH<sub>3</sub>), 14.2 (CH<sub>3</sub>); HRMS (ESI) *m/z*: 702.250 [M + Na]<sup>+</sup>, calcd for C<sub>41</sub>H<sub>37</sub>N<sub>5</sub>O<sub>3</sub>SNa; Found 702.2508.

**(3*a*'*R*,4*S*,4'*S*,6'*R*,7'*R*,7*a*'*R*)-3*a*'-fluoro-3-methyl-1,6',7'-triphenyl-1'-tosyl-2',3',3*a*',4',6',7'-hexahydro-1'H-spiro[pyrazole-4,5'-[7*a*,4](epoxyethano)indol]-5(1*H*)-one (7aaa):**

Prepared by following general procedure **F** purified by column chromatography using EtOAc/hexane

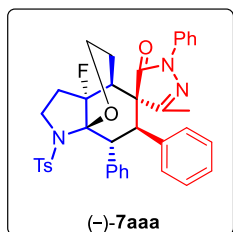

and isolated product **7aaa** in 75% yield as a white solid with M. P. 95-100 °C. The enantiomeric excess (*ee*) was determined by chiral stationary phase HPLC using a Daicel Chiralpak IC column (hexane/EtOAc = 70:30, flow rate 0.5 mL/min,  $\lambda$  = 254 nm), *t<sub>R</sub>* = 19.388 min (major), *t<sub>R</sub>* = 30.762 min (minor),  $[\alpha]_D^{25} = -123.077$  (CHCl<sub>3</sub>, *c* = 0.13 g/100ml for 92%*ee*); IR (neat)  $\nu_{\max}$  2924, 1705, 1597, 1496, 1342 and 1159 cm<sup>-1</sup>; <sup>1</sup>H NMR (400 MHz, CDCl<sub>3</sub>)  $\delta$  7.27-7.26 (1H, m), 7.24-7.16 (6H, m), 7.07-6.95 (12H, m), 4.83-4.81 (1H, m), 4.59 (1H, d, *J* = 11.6 Hz), 3.84-3.76 (3H, m), 3.54-3.47 (1H, m), 2.84-2.81 (1H, m), 2.79-2.62 (1H, m), 2.34 (3H, s), 2.32 (3H, d, *J* = 5.12 Hz), 2.23-2.21 (1H, m), 2.18-2.09 (1H, m), 2.03-1.93 (1H, m); <sup>13</sup>C NMR (100 MHz, CDCl<sub>3</sub>, DEPT-135)  $\delta$  171.9 (C, N-C=O), 162.1 (C, C=N), 143.0 (C), 142.2 (C), 136.9 (C), 136.6 (C), 135.7 (C), 131.1 (CH), 129.9 (CH), 128.9 (2CH), 128.4 (2CH), 128.2 (2CH), 127.7 (2CH), 127.5 (CH), 127.4 (2CH), 125.8 (CH), 125.3 (CH), 120.0 (3CH), 108.4 (C, d, *J* = 187.51 Hz), 97.0 (C, d, *J* = 19.9 Hz), 62.4 (C), 59.7 (CH<sub>2</sub>), 54.6 (CH), 51.5 (CH, d, *J* = 9.82 Hz), 47.1 (CH<sub>2</sub>), 36.2 (CH, C-F, d, *J* = 17.9 Hz), 31.5 (CH<sub>2</sub>, d, *J* = 26.4 Hz), 28.5 (CH<sub>2</sub>, d, *J* = 7.8 Hz), 21.6 (CH<sub>3</sub>), 14.1 (CH<sub>3</sub>, d, *J* = 4.0 Hz); HRMS (ESI) *m/z*: 672.2303 [M + Na]<sup>+</sup>, calcd for C<sub>38</sub>H<sub>36</sub>N<sub>3</sub>O<sub>4</sub>SFNa; Found 672.2303.



## Crystal Structure of **5aai**

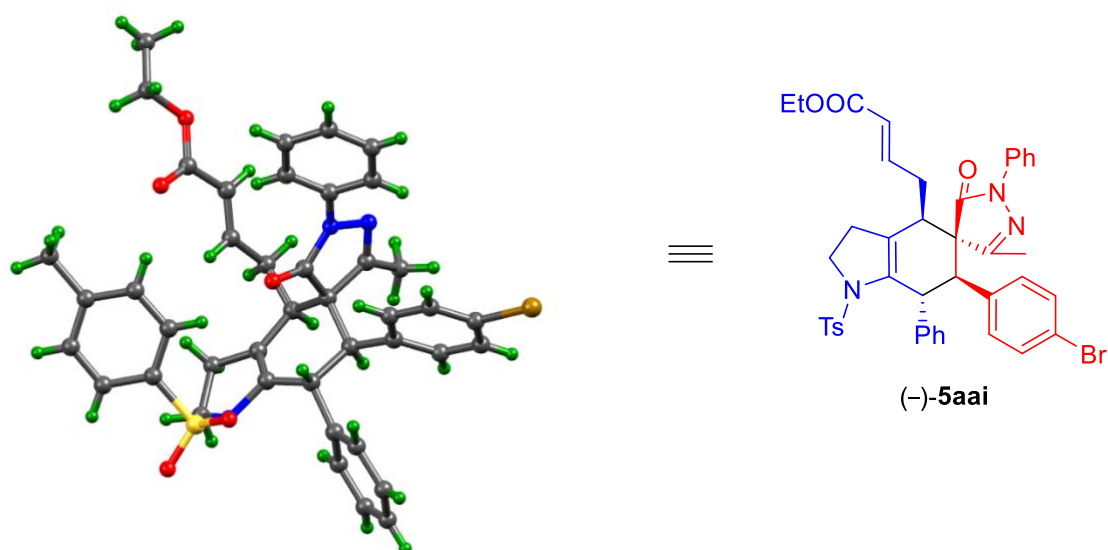

**Table 1:** Crystal data and structure refinement for **5aai**.

|                                 |                                                                    |          |
|---------------------------------|--------------------------------------------------------------------|----------|
| Identification code             | shelx                                                              |          |
| Empirical formula               | C <sub>42</sub> H <sub>40</sub> Br N <sub>3</sub> O <sub>5</sub> S |          |
| Formula weight                  | 778.74                                                             |          |
| Temperature                     | 297(2) K                                                           |          |
| Wavelength                      | 0.71073 Å                                                          |          |
| Crystal system                  | Orthorhombic                                                       |          |
| Space group                     | P 21 21 21                                                         |          |
| Unit cell dimensions            | a = 13.659(7) Å                                                    | α = 90°. |
|                                 | b = 17.867(9) Å                                                    | β = 90°. |
|                                 | c = 31.896(16) Å                                                   | γ = 90°. |
| Volume                          | 7784(7) Å <sup>3</sup>                                             |          |
| Z                               | 8                                                                  |          |
| Density (calculated)            | 1.329 Mg/m <sup>3</sup>                                            |          |
| Absorption coefficient          | 1.157 mm <sup>-1</sup>                                             |          |
| F(000)                          | 3232                                                               |          |
| Crystal size                    | 0.150 x 0.120 x 0.100 mm <sup>3</sup>                              |          |
| Theta range for data collection | 2.428 to 25.000°.                                                  |          |
| Index ranges                    | -16 ≤ h ≤ 16, -21 ≤ k ≤ 20, -37 ≤ l ≤ 37                           |          |
| Reflections collected           | 81398                                                              |          |
| Independent reflections         | 13677 [R(int) = 0.1249]                                            |          |
| Completeness to theta = 25.000° | 99.7 %                                                             |          |



|                                      |                                    |
|--------------------------------------|------------------------------------|
| Absorption correction                | Semi-empirical from equivalents    |
| Max. and min. transmission           | 0.7361 and 0.5933                  |
| Refinement method                    | Full-matrix least-squares on $F^2$ |
| Data / restraints / parameters       | 13677 / 154 / 956                  |
| Goodness-of-fit on $F^2$             | 1.015                              |
| Final R indices [ $I > 2\sigma(I)$ ] | $R_1 = 0.0649$ , $wR_2 = 0.1291$   |
| R indices (all data)                 | $R_1 = 0.1354$ , $wR_2 = 0.1580$   |
| Absolute structure parameter         | 0.040(7)                           |
| Extinction coefficient               | n/a                                |
| Largest diff. peak and hole          | 0.320 and -0.414 e.Å <sup>-3</sup> |
